# Supplementary material for: HIF1α-glycolysis engages activation-induced cell death to drive IFN-γ induction in hypoxic T cells
Source: Research Square preprint supplement (doi:10.21203/rs.3.rs-3830704/v1), 2024-01-12
Supplement: Supplementary file 1 [file 1276112b1b82941d20d8281b.xlsx]

## Sheet: WT vs KO_pvalue-ALL
ems	baseMean	log2FoldChange	lfcSE	stat	pvalue	padj	SYMBOL
ENSMUSG00000023456	5961.57	-1.4062	0.0708596	-19.8449	1.22088e-87	2.19027e-83	Tpi1
ENSMUSG00000025161	575.171	-2.34005	0.122997	-19.0253	1.0531e-80	9.44631e-77	Slc16a3
ENSMUSG00000020277	2078.3	-1.20627	0.0712222	-16.9367	2.41463e-64	1.44395e-60	Pfkl
ENSMUSG00000030695	11630.3	-0.76477	0.0607465	-12.5895	2.41092e-36	1.0813e-32	Aldoa
ENSMUSG00000028527	272.545	-1.91268	0.152182	-12.5684	3.15168e-36	1.13082e-32	Ak4
ENSMUSG00000032294	21654.6	-0.567572	0.0527417	-10.7614	5.23884e-27	1.56641e-23	Pkm
ENSMUSG00000019916	832.198	-0.932833	0.0868882	-10.736	6.8954e-27	1.76719e-23	P4ha1
ENSMUSG00000058966	2135.47	-0.804589	0.0761976	-10.5592	4.60381e-26	1.03241e-22	Tlcd3b
ENSMUSG00000000056	151.059	-1.92566	0.195087	-9.87076	5.57395e-23	1.11107e-19	Narf
ENSMUSG00000063524	18464.3	-0.608511	0.06246	-9.74241	1.98779e-22	3.56609e-19	Eno1
ENSMUSG00000078566	137.691	-1.96802	0.211557	-9.30259	1.37071e-20	2.23551e-17	Bnip3
ENSMUSG00000028645	1413.69	-0.651946	0.0738888	-8.82334	1.11096e-18	1.66089e-15	Slc2a1
ENSMUSG00000027763	9482.57	0.522416	0.0624128	8.37032	5.74599e-17	7.92946e-14	Mbnl1
ENSMUSG00000087700	804.052	-0.842662	0.103213	-8.16431	3.23287e-16	4.14269e-13	NA
ENSMUSG00000050914	55.3039	-2.75676	0.350331	-7.869	3.57477e-15	4.27542e-12	Ankrd37
ENSMUSG00000062070	12769.7	-0.435485	0.0581094	-7.49422	6.66929e-14	7.47794e-11	Pgk1
ENSMUSG00000006494	1015.78	-0.684629	0.0935939	-7.31489	2.57591e-13	2.71834e-10	Pdk1
ENSMUSG00000063229	26513.1	-0.419477	0.0579463	-7.23907	4.51773e-13	4.50267e-10	Ldha
ENSMUSG00000053470	494.319	-0.808962	0.113558	-7.12375	1.05033e-12	9.91728e-10	Kdm3a
ENSMUSG00000109881	92.4911	-1.79179	0.257636	-6.95474	3.53221e-12	3.16839e-09	NA
ENSMUSG00000011752	3206.61	-0.416833	0.0640667	-6.50623	7.70599e-11	6.58311e-08	Pgam1
ENSMUSG00000033307	5458.47	-0.472559	0.0730354	-6.47028	9.78246e-11	7.97715e-08	Mif
ENSMUSG00000029394	1396.39	-0.597988	0.0933968	-6.40266	1.52693e-10	1.19101e-07	Cdk2ap1
ENSMUSG00000031637	40.8822	-2.65012	0.417865	-6.34206	2.26719e-10	1.69473e-07	Lrp2bp
ENSMUSG00000036427	6392.53	-0.380948	0.0609055	-6.25474	3.98172e-10	2.85728e-07	Gpi1
ENSMUSG00000028211	976.16	0.581823	0.0932051	6.24239	4.3093e-10	2.97342e-07	Trp53inp1
ENSMUSG00000029380	44.453	-3.17409	0.513078	-6.18637	6.15672e-10	4.0908e-07	Cxcl1
ENSMUSG00000020303	63.2187	-1.79157	0.297966	-6.01267	1.82492e-09	1.16925e-06	Stc2
ENSMUSG00000035637	255.439	-0.88322	0.147191	-6.00051	1.96694e-09	1.21679e-06	Grhpr
ENSMUSG00000031987	1248.46	-0.475927	0.0804813	-5.91351	3.34895e-09	2.00267e-06	Egln1
ENSMUSG00000057666	36112.8	-0.290589	0.0500969	-5.80054	6.61016e-09	3.82536e-06	Gapdh
ENSMUSG00000037280	1114.71	-0.453319	0.0807548	-5.61352	1.98251e-08	1.11144e-05	Galnt6
ENSMUSG00000019929	94.2424	-1.67256	0.298727	-5.59895	2.1565e-08	1.17235e-05	Dcn
ENSMUSG00000025791	732.165	-0.510733	0.0921227	-5.54406	2.95543e-08	1.55942e-05	Pgm1
ENSMUSG00000085505	242.531	-0.77629	0.14676	-5.2895	1.22648e-07	6.2866e-05	NA
ENSMUSG00000064339	7391.01	0.327766	0.0687686	4.76622	1.87716e-06	0.000935453	NA
ENSMUSG00000000628	1552.31	-0.362655	0.0770717	-4.70543	2.53331e-06	0.00122831	Hk2
ENSMUSG00000052353	29.2408	-2.01474	0.430639	-4.67848	2.89006e-06	0.00136441	Cemip
ENSMUSG00000027663	924.427	0.453195	0.0974466	4.6507	3.30803e-06	0.00152169	Zmat3
ENSMUSG00000003955	1035.72	-0.391906	0.0880291	-4.45201	8.50702e-06	0.00377427	Fam162a
ENSMUSG00000000552	40.9628	1.57896	0.3549	4.44903	8.6257e-06	0.00377427	Zfp385a
ENSMUSG00000032487	40.9183	-1.95016	0.453155	-4.30352	1.68106e-05	0.00718051	Ptgs2
ENSMUSG00000004936	818.927	-0.379701	0.0886286	-4.28418	1.83414e-05	0.00765222	Map2k1
ENSMUSG00000032531	17.4718	-2.49666	0.585793	-4.26202	2.02586e-05	0.00826	Amotl2
ENSMUSG00000026249	272.675	0.617329	0.14548	4.24338	2.20174e-05	0.00877762	Serpine2
ENSMUSG00000040026	175.839	-3.21993	0.760308	-4.23503	2.28517e-05	0.00891216	Saa3
ENSMUSG00000020326	4676.57	0.316181	0.0747983	4.22712	2.367e-05	0.00903489	Ccng1
ENSMUSG00000104605	295.076	-0.579442	0.139198	-4.16272	3.14482e-05	0.0117538	NA
ENSMUSG00000021614	91.0406	1.0392	0.250411	4.14998	3.32509e-05	0.0121739	Vcan
ENSMUSG00000006356	83.6167	0.963563	0.235608	4.08969	4.31947e-05	0.0154983	Crip2
ENSMUSG00000022639	67.3672	-1.0956	0.268218	-4.08473	4.41283e-05	0.0155228	NA
ENSMUSG00000023951	47.2931	-1.36623	0.338409	-4.03724	5.40849e-05	0.0186593	Vegfa
ENSMUSG00000037012	3161.78	-0.267534	0.066488	-4.0238	5.72673e-05	0.0193844	Hk1
ENSMUSG00000029661	335.787	-0.718815	0.180883	-3.97392	7.06992e-05	0.0234878	Col1a2
ENSMUSG00000027797	141.815	1.0762	0.271682	3.96123	7.45658e-05	0.024322	Dclk1
ENSMUSG00000090733	3515.74	-0.271252	0.0697344	-3.88979	0.000100333	0.0321423	Rps27
ENSMUSG00000037440	37.1212	-1.42937	0.369431	-3.8691	0.000109238	0.0343812	Vnn1
ENSMUSG00000022051	602.592	-0.412618	0.10702	-3.85551	0.000115488	0.0357216	Bnip3l
ENSMUSG00000032249	6018.44	-0.215239	0.0562292	-3.82789	0.000129248	0.0393002	Anp32a
ENSMUSG00000103587	8.39944	4.59153	1.21118	3.79094	0.000150078	0.0448732	Gm38326
ENSMUSG00000019979	651.578	0.387057	0.102386	3.78037	0.000156595	0.0460544	Apaf1
ENSMUSG00000038412	586.453	-0.370772	0.0986354	-3.75901	0.000170586	0.0493598	Higd1a
ENSMUSG00000056671	222.716	-0.589314	0.157245	-3.74774	0.000178437	0.050812	Prelid2
ENSMUSG00000015143	2221.85	0.25889	0.0695678	3.7214	0.000198123	0.0552661	Actn1
ENSMUSG00000040128	857.497	-0.352392	0.0947618	-3.71871	0.00020024	0.0552661	Pnrc1
ENSMUSG00000042650	2798.17	-0.23761	0.0640127	-3.71192	0.000205691	0.0559106	Alkbh5
ENSMUSG00000054150	481.687	0.418655	0.113063	3.70285	0.000213192	0.0570844	Syne3
ENSMUSG00000022906	588.536	-0.371534	0.103328	-3.59568	0.000323548	0.0853595	Parp9
ENSMUSG00000021486	4939.53	-0.247215	0.0694129	-3.56151	0.000368725	0.0958684	Prelid1
ENSMUSG00000026042	88.2624	-0.897285	0.252927	-3.5476	0.000388759	0.0996333	Col5a2
ENSMUSG00000021196	3993.68	-0.272177	0.0770951	-3.5304	0.000414931	0.104843	Pfkp
ENSMUSG00000034792	10.3151	2.77606	0.801245	3.46468	0.000530854	0.132271	Gna15
ENSMUSG00000022565	816.361	0.356645	0.103285	3.453	0.000554383	0.136241	Plec
ENSMUSG00000091623	3295.23	-0.246218	0.0718132	-3.42859	0.000606736	0.147092	NA
ENSMUSG00000102298	5.55774	4.91262	1.44162	3.4077	0.000655118	0.156704	NA
ENSMUSG00000026043	159.384	-1.65977	0.490439	-3.38425	0.000713725	0.168477	Col3a1
ENSMUSG00000028893	465.408	0.438734	0.130524	3.36132	0.000775707	0.18073	Sesn2
ENSMUSG00000075122	45.3634	1.1171	0.332853	3.35614	0.000790389	0.181789	Cd80
ENSMUSG00000018707	2628.86	0.295575	0.0883849	3.34418	0.000825248	0.187404	Dync1h1
ENSMUSG00000096768	104.624	0.982719	0.294894	3.33245	0.000860854	0.193046	Erdr1x
ENSMUSG00000068744	299.792	0.468696	0.141531	3.3116	0.000927629	0.205297	Psrc1
ENSMUSG00000040152	233.712	-1.27683	0.386093	-3.30705	0.000942851	0.205297	Thbs1
ENSMUSG00000026773	866.336	-0.286233	0.0866818	-3.30211	0.000959589	0.205297	Pfkfb3
ENSMUSG00000016252	1074.36	-0.31771	0.0962284	-3.30163	0.000961255	0.205297	Atp5e
ENSMUSG00000090062	357.192	-0.417304	0.126892	-3.28865	0.00100668	0.212468	NA
ENSMUSG00000036698	3764.95	0.251413	0.0771362	3.25933	0.00111674	0.232958	Ago2
ENSMUSG00000026822	9.12532	-3.0369	0.935989	-3.24459	0.0011762	0.24254	Lcn2
ENSMUSG00000066036	2088.71	0.299998	0.0929714	3.22677	0.00125194	0.253992	Ubr4
ENSMUSG00000059534	1155.51	-0.365113	0.113305	-3.22239	0.00127124	0.253992	Uqcr10
ENSMUSG00000090553	1450.53	-0.279412	0.0867275	-3.22173	0.00127421	0.253992	Snrpe
ENSMUSG00000020766	1640.85	-0.258482	0.0811434	-3.1855	0.00144505	0.28088	Galk1
ENSMUSG00000038451	24.2891	-1.43405	0.450468	-3.18347	0.00145522	0.28088	Spsb2
ENSMUSG00000028549	307.082	-0.428938	0.134746	-3.1833	0.00145607	0.28088	Itgb3bp
ENSMUSG00000024038	387.299	-0.48847	0.153625	-3.17963	0.00147463	0.281434	Ndufv3
ENSMUSG00000023885	123.874	-0.911187	0.290347	-3.13827	0.00169949	0.320936	Thbs2
ENSMUSG00000038521	66.6791	-0.913304	0.291586	-3.1322	0.00173504	0.324236	C1s1
ENSMUSG00000028284	1660.41	0.239977	0.0767218	3.12788	0.00176069	0.325638	Map3k7
ENSMUSG00000117050	401.131	0.486212	0.156767	3.10149	0.0019255	0.352485	NA
ENSMUSG00000014444	1429.07	0.263233	0.0851317	3.09206	0.00198771	0.360197	Piezo1
ENSMUSG00000019189	1819.5	-0.250389	0.0811184	-3.08672	0.0020238	0.363069	Rnf145
ENSMUSG00000032114	147.2	-0.561025	0.182167	-3.07972	0.00207195	0.363996	Slc37a4
ENSMUSG00000022385	1170.41	0.236596	0.0768241	3.07971	0.00207201	0.363996	Gtse1
ENSMUSG00000104913	239.062	-0.54403	0.176796	-3.07716	0.00208983	0.363996	NA
ENSMUSG00000022587	2132.75	0.230186	0.0748883	3.07372	0.00211406	0.364675	Ly6e
ENSMUSG00000030084	416.08	0.408835	0.133288	3.06731	0.00215995	0.369044	Plxna1
ENSMUSG00000030718	746.927	-0.273906	0.0895623	-3.05828	0.00222613	0.376761	Ppme1
ENSMUSG00000034361	46.7495	0.99206	0.324907	3.05337	0.0022629	0.379406	Cpne2
ENSMUSG00000028599	839.432	0.277582	0.091165	3.04483	0.00232809	0.383168	Tnfrsf1b
ENSMUSG00000025153	11949	0.18775	0.0616627	3.0448	0.00232838	0.383168	Fasn
ENSMUSG00000034205	17.4601	-1.71068	0.562338	-3.04209	0.00234941	0.383168	Loxl2
ENSMUSG00000022797	11142.2	-0.19154	0.0633067	-3.02559	0.00248152	0.401067	Tfrc
ENSMUSG00000007836	10847.3	-0.230747	0.0766119	-3.01189	0.00259625	0.415864	Hnrnpa0
ENSMUSG00000003153	409.686	-0.380348	0.127023	-2.99431	0.00275066	0.436698	Slc2a3
ENSMUSG00000039262	2767.05	0.230296	0.0770528	2.98881	0.00280066	0.440736	Prrc2b
ENSMUSG00000018593	280.913	-0.590092	0.198136	-2.97822	0.00289924	0.452282	Sparc
ENSMUSG00000024201	263.339	-0.464966	0.156861	-2.96419	0.00303484	0.468088	Kdm4b
ENSMUSG00000057322	1794.31	-0.24552	0.0828794	-2.96238	0.00305275	0.468088	Rpl38
ENSMUSG00000022443	17304.7	0.193221	0.0652837	2.95971	0.00307931	0.46816	Myh9
ENSMUSG00000032504	2500.11	0.190312	0.0644747	2.95173	0.00316003	0.476394	Pdcd6ip
ENSMUSG00000095562	68.08	0.93359	0.317131	2.94386	0.00324143	0.479335	Erdr1x
ENSMUSG00000022816	69.8998	-1.0218	0.347106	-2.94377	0.00324239	0.479335	Fstl1
ENSMUSG00000034892	2978.76	-0.236701	0.0804526	-2.94212	0.00325969	0.479335	Rps29
ENSMUSG00000037855	238.335	0.49821	0.169751	2.93495	0.00333603	0.486573	Zfp365
ENSMUSG00000030641	515.75	0.321148	0.109781	2.92535	0.00344074	0.494395	Ddias
ENSMUSG00000056612	2547.59	-0.265027	0.0906081	-2.92498	0.00344478	0.494395	Ppp1r14b
ENSMUSG00000001506	540.31	-0.921597	0.318446	-2.89404	0.00380316	0.540527	Col1a1
ENSMUSG00000003824	164.192	-0.511592	0.176891	-2.89212	0.00382647	0.540527	Syce2
ENSMUSG00000028581	7567.61	0.200287	0.0693907	2.88636	0.00389724	0.546223	Laptm5
ENSMUSG00000026989	162.717	-0.579609	0.201706	-2.87353	0.00405915	0.564505	Dapl1
ENSMUSG00000062997	5293.07	-0.168986	0.0591393	-2.85742	0.00427102	0.5894	Rpl35
ENSMUSG00000029371	83.1248	-0.870921	0.306318	-2.8432	0.00446634	0.611102	Cxcl5
ENSMUSG00000060636	4163.86	-0.172988	0.0608886	-2.84106	0.0044964	0.611102	Rpl35a
ENSMUSG00000031328	6293.12	0.213337	0.0752225	2.83608	0.00456706	0.616039	Flna
ENSMUSG00000025584	138.985	-0.625476	0.221007	-2.83012	0.0046531	0.619827	Pde8a
ENSMUSG00000073702	6508.99	-0.191862	0.0678113	-2.82935	0.00466425	0.619827	Rpl31
ENSMUSG00000082066	23.9628	-1.24985	0.443106	-2.82067	0.0047924	0.630305	NA
ENSMUSG00000117779	7.98023	-2.34669	0.832377	-2.81927	0.00481337	0.630305	NA
ENSMUSG00000028364	49.9153	-0.894237	0.317856	-2.81335	0.0049029	0.632927	Tnc
ENSMUSG00000051149	107.818	-0.699592	0.248711	-2.81287	0.00491022	0.632927	Adnp
ENSMUSG00000038690	1210.63	-0.298344	0.106136	-2.81097	0.00493923	0.632927	Atp5j2
ENSMUSG00000023000	2.47694	4.75179	1.69212	2.8082	0.00498199	0.633879	Dhh
ENSMUSG00000058454	707.83	0.269329	0.0960332	2.80454	0.00503881	0.635143	Dhcr7
ENSMUSG00000030522	56.6761	0.818306	0.291938	2.80302	0.00506273	0.635143	Mtmr10
ENSMUSG00000002477	1480.3	-0.219033	0.0783122	-2.79691	0.00515932	0.642765	Snrpd1
ENSMUSG00000097145	59.2789	0.894692	0.321157	2.78584	0.00533895	0.660557	9230114K14Rik
ENSMUSG00000057863	3439.6	-0.171218	0.061713	-2.77442	0.00552997	0.677388	Rpl36
ENSMUSG00000008730	2247.15	0.180001	0.0649409	2.77177	0.00557524	0.677388	Hipk1
ENSMUSG00000027133	1280.68	-0.240182	0.0867392	-2.76901	0.00562272	0.677388	Nop10
ENSMUSG00000039450	68.1451	0.76044	0.274644	2.76882	0.00562602	0.677388	Dcxr
ENSMUSG00000004885	324.984	-0.378872	0.137126	-2.76294	0.00572829	0.682797	Crabp2
ENSMUSG00000091537	2385.49	-0.213555	0.0773645	-2.76037	0.00577352	0.682797	Tma7
ENSMUSG00000091537	2385.49	-0.213555	0.0773645	-2.76037	0.00577352	0.682797	Tma7-ps
ENSMUSG00000019737	2.48916	4.75781	1.72475	2.75855	0.00580577	0.682797	Syne4
ENSMUSG00000015568	36.1033	-1.08958	0.395121	-2.75758	0.00582318	0.682797	Lpl
ENSMUSG00000023830	1592.9	0.221829	0.0806565	2.7503	0.00595414	0.692728	Igf2r
ENSMUSG00000001151	898.92	0.256689	0.0933891	2.7486	0.00598511	0.692728	Pcnt
ENSMUSG00000029101	93.6903	0.619668	0.226125	2.74038	0.00613688	0.702673	Rgs12
ENSMUSG00000021668	278.277	0.368508	0.134506	2.73971	0.00614937	0.702673	Polk
ENSMUSG00000001855	1940.15	0.219612	0.0805355	2.7269	0.0063932	0.725912	Nup214
ENSMUSG00000029810	42.4957	-0.925302	0.340152	-2.72026	0.00652305	0.731064	Tmem176b
ENSMUSG00000024002	2584.94	0.191865	0.0706153	2.71705	0.00658665	0.731064	Brd4
ENSMUSG00000073000	18.95	1.39643	0.514063	2.71646	0.00659843	0.731064	Ppp1r36dn
ENSMUSG00000039238	20.2759	1.43406	0.527944	2.7163	0.00660159	0.731064	Zfp750
ENSMUSG00000056427	18.0942	-1.40928	0.519805	-2.71117	0.00670472	0.737931	Slit3
ENSMUSG00000044330	54.9411	-1.08322	0.399949	-2.70839	0.00676109	0.739597	NA
ENSMUSG00000044167	824.795	0.253531	0.0936825	2.70628	0.00680418	0.7398	Foxo1
ENSMUSG00000008683	7011.3	-0.190654	0.0705152	-2.70374	0.00685649	0.740997	Rps15a
ENSMUSG00000049878	400.172	-0.343814	0.127579	-2.69492	0.00704063	0.756015	Rlf
ENSMUSG00000040274	1194.03	0.211885	0.078678	2.69307	0.00707974	0.756015	Cdk6
ENSMUSG00000037211	1305.01	-0.264381	0.0987518	-2.67722	0.0074235	0.788033	Spry1
ENSMUSG00000020850	9398.69	0.1744	0.0652518	2.67272	0.007524	0.789826	Prpf8
ENSMUSG00000038256	406.588	-0.323414	0.121015	-2.67252	0.00752844	0.789826	Bcl9
ENSMUSG00000079435	3744.23	-0.206626	0.077418	-2.66897	0.0076085	0.793584	Rpl36a
ENSMUSG00000037242	1511.9	0.199913	0.0750374	2.66418	0.00771752	0.799817	Clic4
ENSMUSG00000021485	598.208	-0.339952	0.127812	-2.65977	0.0078194	0.799817	Mxd3
ENSMUSG00000034342	1956.98	0.240041	0.0902529	2.65964	0.00782235	0.799817	Cbl
ENSMUSG00000035778	564.656	0.331281	0.124805	2.65438	0.00794548	0.799817	Ggta1
ENSMUSG00000025261	4599.87	0.237939	0.0896493	2.65411	0.00795177	0.799817	Huwe1
ENSMUSG00000086862	60.0911	-0.739181	0.27851	-2.65406	0.00795301	0.799817	Gm13546
ENSMUSG00000049502	821.424	-0.235069	0.0886085	-2.6529	0.00798034	0.799817	Dtx3l
ENSMUSG00000027472	410.612	0.316793	0.119717	2.64618	0.00814062	0.80901	Pdrg1
ENSMUSG00000034932	365.811	-0.314842	0.11902	-2.64528	0.00816225	0.80901	Mrpl54
ENSMUSG00000021831	1099.88	-0.206426	0.0781688	-2.64077	0.0082717	0.810599	Ero1a
ENSMUSG00000039221	1582.51	-0.23633	0.0896122	-2.63725	0.00835817	0.810599	Rpl22l1
ENSMUSG00000040249	218.606	-0.405285	0.15383	-2.63463	0.00842298	0.810599	Lrp1
ENSMUSG00000024892	214.669	-0.391569	0.148697	-2.63333	0.00845524	0.810599	Pcx
ENSMUSG00000038274	5747.85	-0.185914	0.0706398	-2.63186	0.00849185	0.810599	Fau
ENSMUSG00000093674	8307.03	-0.20522	0.0780384	-2.62973	0.00854532	0.810599	Rpl41
ENSMUSG00000034881	62.8125	0.712949	0.271174	2.62912	0.00856052	0.810599	Tbxa2r
ENSMUSG00000005198	5823.21	0.17191	0.0654262	2.62754	0.00860059	0.810599	Polr2a
ENSMUSG00000032253	1007.53	0.247739	0.0943241	2.62647	0.00862759	0.810599	Phip
ENSMUSG00000030095	452.219	0.293223	0.111741	2.62412	0.00868724	0.810599	Tmem43
ENSMUSG00000053929	150.68	-0.513761	0.195809	-2.62379	0.00869586	0.810599	Zftraf1
ENSMUSG00000039568	631.558	-0.268951	0.102542	-2.62282	0.00872049	0.810599	Ubald1
ENSMUSG00000031502	49.7165	-0.809771	0.309081	-2.61993	0.00879475	0.813287	Col4a1
ENSMUSG00000071552	368.155	0.361667	0.138471	2.61186	0.00900508	0.821649	Tigit
ENSMUSG00000058761	364.072	0.313368	0.120079	2.60968	0.00906278	0.821649	Rnf169
ENSMUSG00000057359	127.37	-0.528062	0.202429	-2.60863	0.0090906	0.821649	NA
ENSMUSG00000032182	552.09	0.264977	0.101628	2.60731	0.00912561	0.821649	Yipf2
ENSMUSG00000022665	37.2928	-0.9205	0.353154	-2.60652	0.00914688	0.821649	Ccdc80
ENSMUSG00000037944	2800.41	0.177107	0.0679605	2.60603	0.00915996	0.821649	Ccr7
ENSMUSG00000031634	307.634	-0.355688	0.136849	-2.59913	0.00934617	0.834181	Ufsp2
ENSMUSG00000046058	84.7908	-0.632735	0.243744	-2.5959	0.00943444	0.83789	Eid2
ENSMUSG00000033855	68.6158	0.667482	0.257862	2.58853	0.00963876	0.85182	Ston1
ENSMUSG00000030615	445.188	-0.338913	0.131032	-2.5865	0.00969574	0.85186	Tmem126a
ENSMUSG00000070394	163.043	-0.496916	0.192221	-2.58513	0.00973418	0.85186	Tmem256
ENSMUSG00000058006	2034.24	0.271	0.104956	2.58203	0.00982206	0.853336	Mdn1
ENSMUSG00000059994	9.36944	-1.90269	0.737136	-2.58118	0.00984619	0.853336	Fcrl1
ENSMUSG00000068086	7.55706	2.69834	1.04614	2.57934	0.009899	0.853789	Cyp2d9
ENSMUSG00000046574	699.669	0.252922	0.0984587	2.56881	0.0102048	0.873378	Prr12
ENSMUSG00000016526	92.0324	0.58581	0.22843	2.5645	0.0103323	0.873378	Dyrk3
ENSMUSG00000014313	1086.56	-0.253936	0.0990333	-2.56415	0.010343	0.873378	Cox6c
ENSMUSG00000064351	30810.2	0.152513	0.0594811	2.56406	0.0103454	0.873378	COX1
ENSMUSG00000021290	634.464	-0.321086	0.125265	-2.56326	0.0103695	0.873378	Atp5mpl
ENSMUSG00000027750	133.192	-1.65444	0.648176	-2.55245	0.0106969	0.896739	Postn
ENSMUSG00000091367	397.204	-0.34508	0.135308	-2.55033	0.0107622	0.898019	NA
ENSMUSG00000059040	117.13	-0.673887	0.264408	-2.54867	0.0108136	0.898102	Eno1b
ENSMUSG00000096842	949.914	-0.230241	0.0903946	-2.54706	0.0108633	0.898102	NA
ENSMUSG00000032011	2414.54	-0.27325	0.10749	-2.5421	0.0110189	0.906783	Thy1
ENSMUSG00000033004	1815.92	0.243973	0.0961288	2.53798	0.0111493	0.91333	Mycbp2
ENSMUSG00000029772	882.743	0.219524	0.0866333	2.53395	0.0112784	0.919706	Ahcyl2
ENSMUSG00000036751	1201.64	-0.260158	0.102778	-2.53125	0.0113657	0.921784	Cox6b1
ENSMUSG00000040824	2178.26	-0.203571	0.0804632	-2.52999	0.0114067	0.921784	Snrpd2
ENSMUSG00000028465	5563.94	0.17432	0.0690127	2.52591	0.01154	0.925268	Tln1
ENSMUSG00000015806	997.552	-0.253245	0.100299	-2.52491	0.0115728	0.925268	Qdpr
ENSMUSG00000043207	1513.65	0.188113	0.074551	2.52328	0.0116266	0.925268	Zmpste24
ENSMUSG00000035517	20.3166	1.24604	0.493992	2.52239	0.0116561	0.925268	Tdrd7
ENSMUSG00000048154	1264.84	0.246764	0.0979627	2.51896	0.0117703	0.930221	Kmt2d
ENSMUSG00000048794	3.9995	-3.47221	1.3796	-2.51683	0.0118417	0.931751	Cfap100
ENSMUSG00000040997	183.967	0.423099	0.168289	2.51412	0.0119331	0.932802	Abhd4
ENSMUSG00000110545	55.1139	-0.959068	0.381589	-2.51335	0.011959	0.932802	NA
ENSMUSG00000023175	3126.68	-0.166695	0.0663919	-2.51078	0.0120465	0.935562	Bsg
ENSMUSG00000032332	103.504	-1.28171	0.511355	-2.50649	0.0121935	0.942893	Col12a1
ENSMUSG00000014294	420.901	-0.324754	0.12968	-2.50426	0.0122708	0.944796	Ndufa2
ENSMUSG00000015812	2.13177	-4.55197	1.82447	-2.49495	0.0125973	0.965426	Gnrh1
ENSMUSG00000026831	7.0934	2.31802	0.929608	2.49355	0.0126473	0.965426	Pierce1
ENSMUSG00000097750	172.073	-0.469721	0.188486	-2.49207	0.0127001	0.965426	NA
ENSMUSG00000019851	73.0481	0.648544	0.260724	2.48748	0.0128653	0.973839	Perp
ENSMUSG00000096993	207.386	0.384546	0.154686	2.48598	0.0129194	0.973839	Gm26787
ENSMUSG00000064345	5897.34	0.143021	0.0576818	2.47948	0.0131574	0.982064	ND2
ENSMUSG00000101970	87.2659	-0.588794	0.237571	-2.47839	0.0131975	0.982064	Chaserr
ENSMUSG00000059895	1908.01	0.242286	0.0977904	2.4776	0.0132268	0.982064	Ptp4a3
ENSMUSG00000028927	45.5958	0.786836	0.317651	2.47705	0.0132475	0.982064	Padi2
ENSMUSG00000064363	3390.94	0.160024	0.0646805	2.47407	0.0133582	0.982108	ND4
ENSMUSG00000073236	88.6679	-0.59964	0.242447	-2.47329	0.0133877	0.982108	2500004C02Rik
ENSMUSG00000007656	1251.45	-0.219043	0.0885869	-2.47263	0.0134123	0.982108	Arpp19
ENSMUSG00000083836	50.1141	-0.839106	0.339763	-2.46968	0.0135233	0.986215	NA
ENSMUSG00000105987	9039.23	0.13342	0.0541256	2.465	0.0137012	0.990883	NA
ENSMUSG00000040407	606.144	0.273748	0.111071	2.46463	0.0137155	0.990883	Akap9
ENSMUSG00000026667	2744.85	0.165015	0.0670136	2.46241	0.0138008	0.990883	Uhmk1
ENSMUSG00000018906	33.8259	-0.951147	0.386298	-2.46221	0.0138083	0.990883	P4ha2
ENSMUSG00000017386	885.1	0.209961	0.0854398	2.45741	0.0139942	0.999982	Traf4
ENSMUSG00000064023	134.969	-0.475612	0.193668	-2.45582	0.0140565	0.999982	Klk8
ENSMUSG00000065273	1.97369	-4.44048	1.81135	-2.45148	0.014227	0.999982	Gm25128
ENSMUSG00000022205	3889.82	-0.162771	0.0665973	-2.44411	0.0145209	0.999982	Sub1
ENSMUSG00000024319	989.201	0.214032	0.0876101	2.443	0.0145656	0.999982	Vps52
ENSMUSG00000001229	1452.29	0.182895	0.074891	2.44214	0.0146003	0.999982	Dpp9
ENSMUSG00000020077	2757.76	-0.157394	0.064593	-2.4367	0.0148221	0.999982	Srgn
ENSMUSG00000048458	198.938	0.428267	0.176201	2.43056	0.0150755	0.999982	Inka2
ENSMUSG00000059291	8917.53	-0.143764	0.0592174	-2.42773	0.0151936	0.999982	Rpl11
ENSMUSG00000059291	8917.53	-0.143764	0.0592174	-2.42773	0.0151936	0.999982	LOC115489947
ENSMUSG00000029505	1814.66	0.197777	0.0817423	2.41952	0.0155411	0.999982	Ep400
ENSMUSG00000049760	510.734	-0.260025	0.10748	-2.41929	0.0155507	0.999982	Micos13
ENSMUSG00000040018	561.9	0.2473	0.102282	2.41783	0.0156135	0.999982	Cox15
ENSMUSG00000028961	2831.16	-0.15237	0.0630253	-2.4176	0.0156231	0.999982	Pgd
ENSMUSG00000027651	1024.58	0.199842	0.0826765	2.41716	0.0156421	0.999982	Rprd1b
ENSMUSG00000120507	13.7808	-1.39587	0.577743	-2.41608	0.0156887	0.999982	NA
ENSMUSG00000110647	2.8403	-3.91017	1.61888	-2.41536	0.0157198	0.999982	NA
ENSMUSG00000031503	51.6952	-0.762205	0.315946	-2.41245	0.0158456	0.999982	Col4a2
ENSMUSG00000037674	1375.03	0.200673	0.0833209	2.40843	0.0160211	0.999982	Rfx7
ENSMUSG00000021185	354.818	0.422835	0.175565	2.40842	0.0160217	0.999982	Dglucy
ENSMUSG00000029478	1410.63	0.215767	0.0896613	2.40647	0.0161075	0.999982	Ncor2
ENSMUSG00000074280	22.698	-1.21094	0.503664	-2.40426	0.0162054	0.999982	NA
ENSMUSG00000024529	135.988	-0.529834	0.221114	-2.3962	0.0165661	0.999982	Lox
ENSMUSG00000044258	6.14786	-2.35886	0.984719	-2.39546	0.0165993	0.999982	Ctla2a
ENSMUSG00000021607	599.589	-0.268065	0.112022	-2.39297	0.0167127	0.999982	Mrpl36
ENSMUSG00000036168	297.743	-0.329341	0.137642	-2.39273	0.0167236	0.999982	Ccdc38
ENSMUSG00000006411	2.83239	3.89361	1.63062	2.38781	0.0169489	0.999982	Nectin4
ENSMUSG00000026875	880.964	0.232199	0.0972503	2.38765	0.0169566	0.999982	Traf1
ENSMUSG00000033316	14.1618	-1.36527	0.572803	-2.3835	0.0171491	0.999982	Galnt9
ENSMUSG00000002083	337.239	0.29272	0.123245	2.3751	0.017544	0.999982	Bbc3
ENSMUSG00000053293	2818.43	0.16207	0.0683192	2.37225	0.01768	0.999982	Pom121
ENSMUSG00000031983	94.5934	-0.55794	0.235628	-2.36789	0.0178899	0.999982	2310022B05Rik
ENSMUSG00000032606	46.2372	0.746943	0.315452	2.36785	0.0178918	0.999982	Nicn1
ENSMUSG00000031506	2962.54	0.184946	0.0781218	2.36741	0.0179131	0.999982	Ptpn7
ENSMUSG00000023067	1499.87	0.558435	0.236018	2.36607	0.0179779	0.999982	Cdkn1a
ENSMUSG00000041801	502.817	0.328442	0.139026	2.36245	0.0181548	0.999982	Phlda3
ENSMUSG00000045482	2455.77	0.188937	0.0799804	2.36229	0.0181625	0.999982	Trrap
ENSMUSG00000082179	5.78903	-2.27862	0.964617	-2.3622	0.0181666	0.999982	NA
ENSMUSG00000003429	11809.2	-0.1583	0.0670898	-2.35952	0.0182984	0.999982	Rps11
ENSMUSG00000028965	1910.32	-0.161975	0.0686925	-2.35797	0.018375	0.999982	Tnfrsf9
ENSMUSG00000031485	485.475	0.267231	0.113367	2.35723	0.018412	0.999982	Plpbp
ENSMUSG00000071528	992.449	-0.23384	0.0992199	-2.35679	0.0184337	0.999982	Atp5md
ENSMUSG00000071528	992.449	-0.23384	0.0992199	-2.35679	0.0184337	0.999982	Gm35857
ENSMUSG00000020806	126.214	0.457506	0.194713	2.34964	0.0187915	0.999982	Rhbdf2
ENSMUSG00000081400	189.664	-0.538893	0.229489	-2.34823	0.0188626	0.999982	Gm13680
ENSMUSG00000099083	258.326	0.328492	0.139918	2.34774	0.0188877	0.999982	Atf7
ENSMUSG00000045962	3880.54	0.173696	0.0740207	2.34659	0.0189463	0.999982	Wnk1
ENSMUSG00000078967	1.83388	-4.33128	1.84702	-2.34501	0.0190263	0.999982	Gapdh-ps16
ENSMUSG00000071722	484.373	-0.278507	0.119166	-2.33713	0.0194325	0.999982	Spin4
ENSMUSG00000032384	686.586	0.231225	0.0992968	2.32863	0.0198788	0.999982	Csnk1g1
ENSMUSG00000025224	889.605	0.228378	0.0983111	2.32301	0.0201786	0.999982	Gbf1
ENSMUSG00000022961	4416.85	0.15541	0.0669128	2.32257	0.0202023	0.999982	Son
ENSMUSG00000036850	514.015	-0.239375	0.103177	-2.32004	0.0203389	0.999982	Mrpl41
ENSMUSG00000004356	2927.72	0.168756	0.0727536	2.31955	0.020365	0.999982	Utp20
ENSMUSG00000061111	351.862	-0.30988	0.133603	-2.3194	0.0203731	0.999982	Mcrip1
ENSMUSG00000054008	833.632	0.210676	0.0909318	2.31686	0.0205115	0.999982	Ndst1
ENSMUSG00000102070	158.675	-0.414775	0.179075	-2.3162	0.0205471	0.999982	NA
ENSMUSG00000031778	6.68133	-2.26141	0.978275	-2.31163	0.0207981	0.999982	Cx3cl1
ENSMUSG00000026478	309.228	0.30555	0.13235	2.30866	0.0209624	0.999982	Lamc1
ENSMUSG00000094910	1.80708	-4.31345	1.86867	-2.30831	0.020982	0.999982	D430019H16Rik
ENSMUSG00000024073	3045.36	0.202334	0.0877271	2.30641	0.021088	0.999982	Birc6
ENSMUSG00000043099	213.778	0.452323	0.196421	2.30282	0.0212887	0.999982	Hic1
ENSMUSG00000030609	962.821	0.193227	0.0841094	2.29733	0.0216	0.999982	Aen
ENSMUSG00000080868	2.70008	-3.82978	1.66736	-2.29691	0.021624	0.999982	NA
ENSMUSG00000090290	860.192	0.20919	0.0911842	2.29415	0.0217819	0.999982	Tarbp1
ENSMUSG00000029763	945.62	0.220394	0.0962068	2.29084	0.0219729	0.999982	Exoc4
ENSMUSG00000035674	517.807	-0.366911	0.160176	-2.29067	0.0219823	0.999982	Ndufa3
ENSMUSG00000096727	2144.83	-0.190612	0.083236	-2.29002	0.02202	0.999982	Psmb9
ENSMUSG00000024513	1614.6	-0.180264	0.0787272	-2.28973	0.0220367	0.999982	Mbd2
ENSMUSG00000108366	108.287	-0.664858	0.290509	-2.2886	0.0221025	0.999982	Gm5586
ENSMUSG00000022635	571.369	-0.226355	0.0989099	-2.2885	0.0221085	0.999982	Zcrb1
ENSMUSG00000000594	412.095	-0.265659	0.116229	-2.28564	0.0222751	0.999982	Gm2a
ENSMUSG00000027810	1325.74	-0.180282	0.0789974	-2.28213	0.0224816	0.999982	Eif2a
ENSMUSG00000063457	7450.9	-0.161158	0.070623	-2.28195	0.0224924	0.999982	Rps15
ENSMUSG00000049517	7574.65	-0.131126	0.0575133	-2.27992	0.0226125	0.999982	Rps23
ENSMUSG00000005447	85.4737	-0.535865	0.235237	-2.27798	0.022728	0.999982	Pafah1b3
ENSMUSG00000025746	5.04283	-2.7595	1.21221	-2.27642	0.0228207	0.999982	Il6
ENSMUSG00000033730	3310.79	-0.215318	0.0946012	-2.27606	0.0228423	0.999982	Egr3
ENSMUSG00000108042	1.78881	-4.30112	1.89082	-2.27474	0.0229218	0.999982	NA
ENSMUSG00000031246	951.561	0.211507	0.0930092	2.27404	0.0229635	0.999982	Sh3bgrl
ENSMUSG00000075256	157.453	0.534832	0.235531	2.27075	0.023162	0.999982	Cerkl
ENSMUSG00000039703	1730.1	0.155375	0.0684639	2.26944	0.0232416	0.999982	Nploc4
ENSMUSG00000030655	1526.92	0.232879	0.102919	2.26274	0.0236518	0.999982	Smg1
ENSMUSG00000022799	506.918	0.233054	0.103129	2.25984	0.0238314	0.999982	Arhgap31
ENSMUSG00000040599	674.185	-0.213306	0.0945105	-2.25695	0.0240111	0.999982	Mis12
ENSMUSG00000036918	804.369	0.194453	0.0861929	2.25603	0.0240689	0.999982	Ttc7
ENSMUSG00000007080	1631.18	0.163875	0.0727103	2.2538	0.0242087	0.999982	Pole
ENSMUSG00000042349	237.397	0.338476	0.150224	2.25314	0.0242501	0.999982	Ikbke
ENSMUSG00000091269	28.6242	-1.04793	0.465426	-2.25156	0.02435	0.999982	Gm6682
ENSMUSG00000022672	399.99	0.264701	0.117714	2.24868	0.024533	0.999982	Prkdc
ENSMUSG00000079092	23.7971	1.04153	0.463665	2.2463	0.0246846	0.999982	Prl2c2
ENSMUSG00000028840	361.787	-0.271941	0.121109	-2.24542	0.0247413	0.999982	Zfp593
ENSMUSG00000022614	918.332	0.189111	0.0842346	2.24506	0.0247645	0.999982	Lmf2
ENSMUSG00000027171	322.412	0.300343	0.133948	2.24223	0.0249462	0.999982	Prrg4
ENSMUSG00000056962	726.857	-0.211943	0.0945426	-2.24177	0.0249762	0.999982	Jmjd6
ENSMUSG00000020184	1263.05	0.186907	0.0835349	2.23747	0.0252555	0.999982	Mdm2
ENSMUSG00000079942	158.638	-0.412687	0.184531	-2.23641	0.025325	0.999982	Rpl28-ps3
ENSMUSG00000038604	177.924	0.40178	0.179663	2.2363	0.0253322	0.999982	Ripor1
ENSMUSG00000041638	3079.43	0.145585	0.0651117	2.23593	0.0253562	0.999982	Gcn1
ENSMUSG00000022885	537.236	-0.709197	0.317557	-2.23329	0.0255296	0.999982	St6gal1
ENSMUSG00000039294	378.886	-0.294748	0.132023	-2.23255	0.0255784	0.999982	Cybc1
ENSMUSG00000118051	186.092	-0.40072	0.179543	-2.23189	0.0256219	0.999982	Gm8714
ENSMUSG00000026960	635.251	-0.217768	0.0976904	-2.22916	0.0258031	0.999982	Arl6ip6
ENSMUSG00000057738	3219.25	0.168052	0.0754336	2.22781	0.0258932	0.999982	Sptan1
ENSMUSG00000115431	11.6659	-1.62212	0.728521	-2.22659	0.0259747	0.999982	NA
ENSMUSG00000040253	528.939	-0.266692	0.11981	-2.22596	0.0260168	0.999982	Gbp7
ENSMUSG00000024401	589.648	-0.248408	0.11165	-2.22488	0.0260893	0.999982	Tnf
ENSMUSG00000022217	290.804	-0.401484	0.180498	-2.22432	0.0261273	0.999982	Emc9
ENSMUSG00000024393	8259.33	0.153159	0.0689125	2.22251	0.0262489	0.999982	Prrc2a
ENSMUSG00000096210	404.478	-0.279921	0.126245	-2.21727	0.0266044	0.999982	H1f0
ENSMUSG00000076824	63.6316	-0.601986	0.271839	-2.21449	0.026795	0.999982	Trav14n-3
ENSMUSG00000003660	4981.55	0.144116	0.0651307	2.21272	0.0269169	0.999982	Snrnp200
ENSMUSG00000026399	46.0508	0.742625	0.336048	2.20988	0.0271138	0.999982	Cd55
ENSMUSG00000069094	1167.01	-0.185417	0.0839195	-2.20946	0.0271426	0.999982	Pde7a
ENSMUSG00000008668	9974.73	-0.144674	0.0655097	-2.20844	0.0272133	0.999982	Rps18
ENSMUSG00000066149	601.353	-0.217701	0.0986035	-2.20784	0.0272552	0.999982	Cdc26
ENSMUSG00000020196	1041.89	0.200135	0.0906623	2.20748	0.0272807	0.999982	Cabin1
ENSMUSG00000020723	3.96429	2.78105	1.26059	2.20616	0.027373	0.999982	Cacng4
ENSMUSG00000041187	958.44	0.187903	0.0852369	2.20448	0.0274908	0.999982	Prkd2
ENSMUSG00000095607	32.9903	0.824031	0.374248	2.20183	0.0276773	0.999982	Trav5-4
ENSMUSG00000026817	17.665	1.16248	0.527967	2.2018	0.0276797	0.999982	Ak1
ENSMUSG00000079523	8466.44	-0.117891	0.0536276	-2.19833	0.0279259	0.999982	Tmsb10
ENSMUSG00000071657	221.568	0.341329	0.155287	2.19806	0.0279451	0.999982	Bscl2
ENSMUSG00000029632	1350.78	-0.17677	0.0804258	-2.19792	0.0279547	0.999982	Ndufa4
ENSMUSG00000032410	781.252	0.206144	0.0938037	2.19762	0.0279765	0.999982	Xrn1
ENSMUSG00000030623	10.2882	-1.52899	0.696211	-2.19616	0.0280804	0.999982	NA
ENSMUSG00000030990	138.061	-0.424269	0.193213	-2.19587	0.0281016	0.999982	Pgap2
ENSMUSG00000012405	6910.39	-0.123236	0.0562394	-2.19127	0.0284325	0.999982	Rpl15
ENSMUSG00000000308	16.7279	1.18819	0.542697	2.18942	0.0285663	0.999982	Ckmt1
ENSMUSG00000019866	581.479	0.29894	0.136657	2.18752	0.0287045	0.999982	Crybg1
ENSMUSG00000052299	1379.03	0.163989	0.0749725	2.18732	0.0287188	0.999982	Ltn1
ENSMUSG00000064367	8327.68	0.124274	0.0568467	2.18612	0.0288065	0.999982	ND5
ENSMUSG00000039218	5958.6	0.169959	0.0777463	2.18608	0.02881	0.999982	Srrm2
ENSMUSG00000108832	2.4547	3.67838	1.68266	2.18605	0.0288119	0.999982	NA
ENSMUSG00000021298	272.254	0.303993	0.13912	2.1851	0.0288812	0.999982	Gpr132
ENSMUSG00000034243	339.04	0.285773	0.130833	2.18427	0.0289426	0.999982	Golgb1
ENSMUSG00000006378	23.898	-0.994066	0.455522	-2.18226	0.0290906	0.999982	Gcat
ENSMUSG00000017778	1242.12	-0.192907	0.0883986	-2.18224	0.0290915	0.999982	Cox7c
ENSMUSG00000112546	43.8661	-0.723555	0.332029	-2.17919	0.0293176	0.999982	NA
ENSMUSG00000076463	173.162	-0.446478	0.204955	-2.17842	0.0293749	0.999982	Trbv3
ENSMUSG00000038235	13.2867	-1.31418	0.603637	-2.1771	0.0294733	0.999982	F11r
ENSMUSG00000006360	280.815	-0.345315	0.158634	-2.17681	0.029495	0.999982	Crip1
ENSMUSG00000000078	1543.63	0.189826	0.0873304	2.17365	0.0297316	0.999982	Klf6
ENSMUSG00000110631	747.859	0.561205	0.258467	2.17129	0.0299096	0.999982	NA
ENSMUSG00000074129	397.683	-0.368626	0.169878	-2.16994	0.0300112	0.999982	Rpl13a
ENSMUSG00000053317	836.842	-0.241032	0.11111	-2.16931	0.0300594	0.999982	Sec61b
ENSMUSG00000020456	3927.92	0.135334	0.062403	2.1687	0.0301051	0.999982	Ogdh
ENSMUSG00000045362	85.8469	0.516377	0.238484	2.16525	0.0303688	0.999982	Tnfrsf26
ENSMUSG00000039686	294.689	0.280814	0.129837	2.16282	0.030555	0.999982	Zer1
ENSMUSG00000026199	104.906	-0.471469	0.218092	-2.16179	0.030634	0.999982	Ankzf1
ENSMUSG00000001280	1563.22	0.161569	0.074826	2.15927	0.0308294	0.999982	Sp1
ENSMUSG00000001119	109.014	-0.459198	0.212761	-2.15828	0.0309064	0.999982	Col6a1
ENSMUSG00000037679	354.186	0.286061	0.132545	2.15822	0.0309108	0.999982	Inf2
ENSMUSG00000069008	12.3023	-1.33732	0.619645	-2.1582	0.0309121	0.999982	NA
ENSMUSG00000060594	4.8143	-2.26797	1.051	-2.15791	0.0309348	0.999982	Layn
ENSMUSG00000023367	33.7301	-0.787083	0.36505	-2.1561	0.0310761	0.999982	Tmem176a
ENSMUSG00000045328	1289.4	0.209781	0.0974228	2.15331	0.0312944	0.999982	Cenpe
ENSMUSG00000041058	360.107	0.265048	0.123191	2.15152	0.0314353	0.999982	Wwp1
ENSMUSG00000033306	150.263	0.387308	0.18005	2.15112	0.0314668	0.999982	Lpp
ENSMUSG00000078922	760.203	-0.259911	0.120844	-2.1508	0.0314917	0.999982	Tgtp1
ENSMUSG00000020593	159.121	0.417259	0.19419	2.14871	0.031657	0.999982	Lpin1
ENSMUSG00000034993	246.124	-0.318144	0.148089	-2.14833	0.0316875	0.999982	Vat1
ENSMUSG00000028080	770.912	0.219942	0.102422	2.14742	0.0317602	0.999982	Lrba
ENSMUSG00000078779	86.5941	-0.50471	0.235056	-2.14719	0.0317782	0.999982	Zfp59
ENSMUSG00000087381	1130.69	0.17223	0.0802388	2.14647	0.0318356	0.999982	NA
ENSMUSG00000112964	46.5012	0.663703	0.309391	2.14519	0.0319374	0.999982	NA
ENSMUSG00000044308	904.955	0.19378	0.0903395	2.14502	0.0319513	0.999982	Ubr3
ENSMUSG00000102900	3.18475	-3.10739	1.44948	-2.14379	0.0320495	0.999982	NA
ENSMUSG00000054720	775.991	0.196294	0.0917653	2.13909	0.0324286	0.999982	Lrrc8c
ENSMUSG00000098573	308.725	0.295354	0.138439	2.13347	0.0328865	0.999982	NA
ENSMUSG00000028868	2575.6	0.144938	0.0679775	2.13214	0.0329953	0.999982	Wasf2
ENSMUSG00000059552	2632.19	0.135909	0.0638278	2.1293	0.0332291	0.999982	Trp53
ENSMUSG00000020721	1023.37	0.198245	0.0931679	2.12782	0.0333519	0.999982	Helz
ENSMUSG00000048279	923.173	0.238526	0.112279	2.12441	0.0336357	0.999982	Sacs
ENSMUSG00000026827	811.793	0.219198	0.103266	2.12265	0.0337828	0.999982	Gpd2
ENSMUSG00000030104	1668.27	0.152802	0.0721257	2.11856	0.034128	0.999982	Edem1
ENSMUSG00000024164	672.365	-0.60419	0.2852	-2.11848	0.0341344	0.999982	C3
ENSMUSG00000006014	134.798	-0.418327	0.19755	-2.11758	0.034211	0.999982	Prg4
ENSMUSG00000032657	145.21	0.398513	0.188223	2.11724	0.0342393	0.999982	Entrep3
ENSMUSG00000039967	775.405	-0.211893	0.100179	-2.11514	0.0344179	0.999982	Zfp292
ENSMUSG00000040204	4621.58	-0.136051	0.064327	-2.11499	0.0344311	0.999982	Pclaf
ENSMUSG00000054871	399.082	-0.331608	0.156963	-2.11266	0.0346302	0.999982	Tmem158
ENSMUSG00000021520	1192.38	-0.188707	0.0893272	-2.11254	0.03464	0.999982	Uqcrb
ENSMUSG00000021767	163.088	0.374646	0.177427	2.11156	0.0347246	0.999982	Kat6b
ENSMUSG00000024414	371.313	-0.26129	0.123832	-2.11004	0.0348551	0.999982	Mrpl27
ENSMUSG00000064193	152.097	-0.437815	0.207593	-2.10901	0.0349439	0.999982	NA
ENSMUSG00000097025	358.598	0.265258	0.125849	2.10775	0.0350527	0.999982	NA
ENSMUSG00000075591	69.5344	-0.603721	0.286715	-2.10565	0.0352351	0.999982	Gm10874
ENSMUSG00000038555	37.6266	0.723379	0.343914	2.10337	0.0354331	0.999982	Reep2
ENSMUSG00000063316	10253.3	-0.127314	0.0605451	-2.1028	0.0354835	0.999982	Rpl27
ENSMUSG00000045996	239.579	-0.320724	0.152683	-2.10058	0.0356778	0.999982	Polr2k
ENSMUSG00000098234	513.128	-0.290497	0.138352	-2.09969	0.0357559	0.999982	Snhg6
ENSMUSG00000011831	105.749	0.457592	0.217972	2.09931	0.0357893	0.999982	Evi5
ENSMUSG00000108934	7.16361	-1.75011	0.83403	-2.09838	0.0358719	0.999982	NA
ENSMUSG00000068184	249.196	-0.301367	0.143686	-2.0974	0.0359579	0.999982	Ndufaf2
ENSMUSG00000027009	875.117	0.281965	0.134557	2.09552	0.0361252	0.999982	Itga4
ENSMUSG00000028960	1757.07	0.145229	0.0693208	2.09503	0.0361683	0.999982	Ube4b
ENSMUSG00000058600	6538.49	-0.12525	0.0598223	-2.09371	0.0362859	0.999982	Rpl30
ENSMUSG00000093966	24.3046	0.92299	0.440951	2.09318	0.0363331	0.999982	Trav4-3
ENSMUSG00000020826	14.1962	-1.21783	0.581858	-2.093	0.0363495	0.999982	Nos2
ENSMUSG00000040054	1094.38	0.190351	0.0909512	2.09289	0.0363587	0.999982	Baz2a
ENSMUSG00000030172	357.222	0.271574	0.129888	2.09083	0.0365429	0.999982	Erc1
ENSMUSG00000024940	51.7454	-0.626845	0.299984	-2.0896	0.036654	0.999982	Ltbp3
ENSMUSG00000082662	5.14656	-2.08119	0.996466	-2.08857	0.036746	0.999982	NA
ENSMUSG00000031438	41.366	-0.728957	0.349025	-2.08855	0.0367482	0.999982	Rnf128
ENSMUSG00000061533	237.376	0.309438	0.148193	2.08807	0.0367917	0.999982	Cep128
ENSMUSG00000004931	212.191	-0.316815	0.151734	-2.08797	0.0368006	0.999982	Apba3
ENSMUSG00000031958	31.0964	-0.790509	0.378766	-2.08707	0.0368822	0.999982	Ldhd
ENSMUSG00000097989	9.22007	-1.58632	0.76028	-2.08649	0.0369342	0.999982	Gm4335
ENSMUSG00000115728	562.649	0.211258	0.101259	2.08632	0.03695	0.999982	NA
ENSMUSG00000072941	19.8847	-1.16213	0.557526	-2.08443	0.0371207	0.999982	Sod3
ENSMUSG00000024769	47.08	0.682862	0.327673	2.08398	0.0371622	0.999982	Cdc42bpg
ENSMUSG00000027601	659.38	0.195737	0.093928	2.08391	0.0371685	0.999982	Mtfr1
ENSMUSG00000035295	4159.3	-0.138257	0.0663734	-2.08301	0.03725	0.999982	Wdr38
ENSMUSG00000021109	3416.84	-0.151169	0.0726279	-2.08141	0.0373963	0.999982	Hif1a
ENSMUSG00000024639	845.108	-0.196478	0.0944478	-2.08029	0.0374993	0.999982	Gnaq
ENSMUSG00000002028	922.221	0.273028	0.131254	2.08014	0.0375123	0.999982	Kmt2a
ENSMUSG00000052102	453.644	0.226879	0.109151	2.07857	0.0376565	0.999982	Gnpda1
ENSMUSG00000047139	107.229	0.482762	0.232354	2.0777	0.0377367	0.999982	Cd24a
ENSMUSG00000049960	498.455	-0.224374	0.108057	-2.07644	0.0378533	0.999982	Mrps16
ENSMUSG00000074884	1542.21	-0.16856	0.0812116	-2.07557	0.0379336	0.999982	Serf2
ENSMUSG00000047591	2.27766	3.56889	1.72068	2.07412	0.0380681	0.999982	Mafa
ENSMUSG00000019158	283.251	-0.290939	0.140339	-2.07311	0.0381617	0.999982	Tmem160
ENSMUSG00000032673	138.693	-0.389605	0.187987	-2.07251	0.0382181	0.999982	Prorsd1
ENSMUSG00000045312	7.10149	-1.72416	0.832747	-2.07045	0.0384104	0.999982	Lhfpl2
ENSMUSG00000046364	9836.08	-0.148906	0.071974	-2.06888	0.0385571	0.999982	Rpl27a
ENSMUSG00000055681	966.447	-0.190741	0.0922567	-2.06751	0.0386862	0.999982	Cope
ENSMUSG00000118642	3112.28	0.615456	0.297759	2.06696	0.0387378	0.999982	NA
ENSMUSG00000001785	1259.25	0.16406	0.0793743	2.06692	0.0387417	0.999982	Pwp1
ENSMUSG00000073421	24.4843	-0.974341	0.471791	-2.0652	0.0389043	0.999982	H2-Ab1
ENSMUSG00000068262	96.8977	-0.50671	0.245381	-2.06499	0.0389238	0.999982	NA
ENSMUSG00000021182	443.503	0.306957	0.148654	2.06491	0.0389311	0.999982	Ccdc88c
ENSMUSG00000047810	1406.81	0.157079	0.0761014	2.06407	0.0390109	0.999982	Ccdc88b
ENSMUSG00000028970	1054.85	0.186822	0.0906181	2.06164	0.0392425	0.999982	Abcb1b
ENSMUSG00000027533	728.121	-0.196359	0.0952904	-2.06064	0.0393372	0.999982	Fabp5
ENSMUSG00000026605	856.17	0.228255	0.110781	2.06042	0.0393588	0.999982	Cenpf
ENSMUSG00000001348	162.298	-0.348624	0.169237	-2.05998	0.0394005	0.999982	Acp5
ENSMUSG00000027006	1166.2	0.180749	0.0878008	2.05863	0.0395298	0.999982	Dnajc10
ENSMUSG00000038664	946.964	0.218623	0.10623	2.05801	0.0395889	0.999982	Herc1
ENSMUSG00000117202	3.1289	3.07007	1.49237	2.05717	0.0396694	0.999982	Gm9349
ENSMUSG00000031232	1055.16	0.175967	0.085547	2.05696	0.0396904	0.999982	Magt1
ENSMUSG00000074629	3.10291	3.0765	1.49585	2.05669	0.0397158	0.999982	NA
ENSMUSG00000085819	340.697	0.27179	0.132151	2.05667	0.0397179	0.999982	NA
ENSMUSG00000080374	1321.22	-0.183913	0.0894608	-2.0558	0.0398019	0.999982	NA
ENSMUSG00000014498	2608.17	0.144094	0.0701468	2.05418	0.0399586	0.999982	Ankrd52
ENSMUSG00000033644	11.9576	1.35596	0.660319	2.05349	0.0400252	0.999982	Piwil2
ENSMUSG00000043445	1098.65	-0.179638	0.0875346	-2.05219	0.0401509	0.999982	Pgp
ENSMUSG00000019846	7.06089	-1.71855	0.838756	-2.04893	0.0404689	0.999982	Lama4
ENSMUSG00000027162	1071.52	0.164913	0.0805713	2.0468	0.0406779	0.999982	Lin7c
ENSMUSG00000048387	1.49877	4.02494	1.96679	2.04645	0.0407124	0.999982	Osr1
ENSMUSG00000027752	938.443	-0.182213	0.0890468	-2.04626	0.0407311	0.999982	Exosc8
ENSMUSG00000004535	1371.05	0.168858	0.0825864	2.04462	0.0408925	0.999982	Tax1bp1
ENSMUSG00000031995	396.351	0.256325	0.125405	2.04398	0.0409559	0.999982	St14
ENSMUSG00000034297	1061.79	0.190204	0.093114	2.0427	0.0410821	0.999982	Med13
ENSMUSG00000117972	28.4881	-0.825234	0.404049	-2.04241	0.0411105	0.999982	Gm6813
ENSMUSG00000090891	1.49024	4.01813	1.96912	2.04058	0.0412931	0.999982	D6Ertd527e
ENSMUSG00000040918	481.421	0.278659	0.136562	2.04053	0.041298	0.999982	Slc19a2
ENSMUSG00000022474	328.218	0.262194	0.128505	2.04035	0.0413156	0.999982	Pmm1
ENSMUSG00000036372	550.302	-0.235751	0.115549	-2.04027	0.0413239	0.999982	Tmem258
ENSMUSG00000037405	552.141	0.232327	0.113873	2.04023	0.0413271	0.999982	Icam1
ENSMUSG00000030451	985.536	0.175978	0.0862755	2.03973	0.0413777	0.999982	Herc2
ENSMUSG00000021958	269.759	-0.27848	0.136816	-2.03543	0.0418073	0.999982	Pinx1
ENSMUSG00000032584	1.51935	-4.05674	1.99317	-2.03532	0.0418185	0.999982	Mst1r
ENSMUSG00000015932	313.592	0.324246	0.159364	2.03462	0.0418889	0.999982	Dstn
ENSMUSG00000113238	6.16616	1.85526	0.911956	2.03437	0.041914	0.999982	NA
ENSMUSG00000063077	643.995	0.221858	0.109192	2.03182	0.0421714	0.999982	Kif1b
ENSMUSG00000050578	3.46952	-2.58899	1.27501	-2.03056	0.0422994	0.999982	Mmp13
ENSMUSG00000030835	3106.76	0.126832	0.0624969	2.02941	0.0424165	0.999982	Nomo1
ENSMUSG00000100865	62.6361	-0.726939	0.35828	-2.02897	0.0424616	0.999982	Gm9320
ENSMUSG00000085596	1.50108	-4.04209	1.9933	-2.02784	0.0425762	0.999982	Gm11476
ENSMUSG00000028081	18840.4	-0.112866	0.0557094	-2.02599	0.0427661	0.999982	Rps3a1
ENSMUSG00000056836	16.2571	-1.17764	0.581439	-2.02539	0.0428275	0.999982	Pin4-ps
ENSMUSG00000065979	288.77	0.290581	0.14351	2.02481	0.0428873	0.999982	Cpped1
ENSMUSG00000082476	3.1854	3.05822	1.5106	2.02451	0.0429182	0.999982	Gm12242
ENSMUSG00000079197	3170.05	-0.171873	0.0849009	-2.02439	0.0429298	0.999982	Psme2
ENSMUSG00000106123	1.47346	-4.01989	1.98634	-2.02377	0.0429936	0.999982	NA
ENSMUSG00000027580	670.212	0.224496	0.110935	2.02367	0.0430037	0.999982	Helz2
ENSMUSG00000121129	82.3993	-0.485648	0.240015	-2.02341	0.0430308	0.999982	NA
ENSMUSG00000025630	2397.16	-0.170439	0.084268	-2.02258	0.043116	0.999982	Hprt
ENSMUSG00000020437	1136.96	0.162291	0.0804117	2.01825	0.0435657	0.999982	Myo1g
ENSMUSG00000054072	3588.15	-0.180664	0.0895436	-2.01761	0.0436317	0.999982	Iigp1
ENSMUSG00000020961	13.6441	1.25213	0.620879	2.01671	0.0437256	0.999982	Ston2
ENSMUSG00000009551	86.4172	0.517065	0.256683	2.01441	0.0439667	0.999982	6330409D20Rik
ENSMUSG00000004319	927.353	-0.198973	0.0987798	-2.01431	0.0439772	0.999982	Clcn3
ENSMUSG00000029623	2548.5	-0.131238	0.0651717	-2.01373	0.0440378	0.999982	Pdap1
ENSMUSG00000010277	3693.37	0.128645	0.0639264	2.0124	0.044178	0.999982	Bltp2
ENSMUSG00000081629	16.0215	-1.20191	0.59738	-2.01197	0.0442236	0.999982	NA
ENSMUSG00000013629	6593.04	0.128406	0.0639057	2.0093	0.0445048	0.999982	Cad
ENSMUSG00000010936	1160.06	0.158486	0.0788797	2.00922	0.0445141	0.999982	Vac14
ENSMUSG00000044876	329.865	-0.251379	0.125134	-2.00889	0.0445492	0.999982	Zfp444
ENSMUSG00000086370	16.4852	1.13587	0.565466	2.00873	0.0445657	0.999982	Ftx
ENSMUSG00000017707	3865.55	0.121191	0.0603608	2.00778	0.044667	0.999982	Serinc3
ENSMUSG00000106969	19.1441	1.02649	0.511514	2.00677	0.0447742	0.999982	NA
ENSMUSG00000041272	873.143	0.216531	0.107981	2.00527	0.0449341	0.999982	Tox
ENSMUSG00000034501	131.357	0.416789	0.207848	2.00526	0.0449355	0.999982	Pcnx4
ENSMUSG00000093467	3.48372	-2.60052	1.29838	-2.0029	0.045188	0.999982	NA
ENSMUSG00000053332	908.636	-0.182562	0.0912039	-2.00169	0.0453182	0.999982	Gas5
ENSMUSG00000041740	2810.93	0.122919	0.0614107	2.00159	0.0453289	0.999982	Rnf10
ENSMUSG00000120390	49.0386	-0.613463	0.306542	-2.00124	0.045367	0.999982	NA
ENSMUSG00000026837	60.3858	-0.658832	0.329314	-2.00062	0.0454337	0.999982	Col5a1
ENSMUSG00000050953	39.6896	0.716699	0.358475	1.9993	0.0455761	0.999982	Gja1
ENSMUSG00000038014	4432.54	0.116427	0.0582751	1.99788	0.0457293	0.999982	Fam120a
ENSMUSG00000109610	2.1552	-3.48449	1.74584	-1.99588	0.0459466	0.999982	Gm7432
ENSMUSG00000046865	5971.3	-0.113437	0.0568375	-1.99582	0.0459537	0.999982	Fbl
ENSMUSG00000063531	2.15438	-3.48423	1.74595	-1.99561	0.0459768	0.999982	Sema3e
ENSMUSG00000112146	2.14667	-3.48449	1.74735	-1.99416	0.0461349	0.999982	NA
ENSMUSG00000029725	247.259	-0.279321	0.14009	-1.99387	0.0461666	0.999982	Ppp1r35
ENSMUSG00000042042	183.693	0.327539	0.164341	1.99304	0.046257	0.999982	Csgalnact2
ENSMUSG00000020647	391.57	0.240281	0.12068	1.99106	0.0464741	0.999982	Ncoa1
ENSMUSG00000050921	432.128	0.223835	0.112461	1.99033	0.0465548	0.999982	P2ry10
ENSMUSG00000069516	11.5938	1.3021	0.654459	1.98958	0.046637	0.999982	Lyz2
ENSMUSG00000003644	2192.42	0.138322	0.0695305	1.98937	0.0466601	0.999982	Rps6ka1
ENSMUSG00000024680	1.62421	4.14633	2.08469	1.98895	0.0467072	0.999982	Ms4a2
ENSMUSG00000057841	9318.09	-0.133859	0.067311	-1.98866	0.0467383	0.999982	Rpl32
ENSMUSG00000031231	882.261	-0.210142	0.105671	-1.98864	0.0467408	0.999982	Cox7b
ENSMUSG00000082193	70.0506	-0.568562	0.285927	-1.98849	0.0467578	0.999982	Rpl5-ps1
ENSMUSG00000109008	2.98642	2.9925	1.50497	1.98842	0.0467653	0.999982	NA
ENSMUSG00000081640	20.0806	-0.969341	0.487815	-1.98711	0.0469104	0.999982	Rplp0-ps1
ENSMUSG00000034156	3.46034	2.5677	1.29219	1.9871	0.0469117	0.999982	Tspoap1
ENSMUSG00000049235	82.1609	-0.639968	0.32221	-1.98618	0.0470132	0.999982	Gm7324
ENSMUSG00000028024	208.492	-0.322608	0.162439	-1.98602	0.0470306	0.999982	Enpep
ENSMUSG00000035678	66.3654	-0.565631	0.284909	-1.9853	0.0471106	0.999982	Tnfsf9
ENSMUSG00000104699	86.4132	-0.629873	0.317392	-1.98452	0.0471974	0.999982	Rps4x-ps
ENSMUSG00000034731	269.698	0.355999	0.179395	1.98444	0.0472073	0.999982	Dgkh
ENSMUSG00000006179	12.2506	1.22097	0.615334	1.98424	0.0472287	0.999982	Prss16
ENSMUSG00000063953	66.2378	-0.671613	0.338497	-1.9841	0.0472445	0.999982	Amd2
ENSMUSG00000028936	3931.49	-0.155792	0.0786065	-1.98192	0.0474878	0.999982	Rpl22
ENSMUSG00000054822	1.46453	-4.01229	2.02487	-1.9815	0.047535	0.999982	NA
ENSMUSG00000028341	4634.23	0.187932	0.0948761	1.98082	0.0476118	0.999982	Nr4a3
ENSMUSG00000028167	56.7274	-0.663944	0.335644	-1.97812	0.0479151	0.999982	Bdh2
ENSMUSG00000097048	38.5712	-0.673515	0.340803	-1.97626	0.0481253	0.999982	1600020E01Rik
ENSMUSG00000095288	26.4898	-0.917997	0.464684	-1.97553	0.0482079	0.999982	NA
ENSMUSG00000031662	334.331	0.240374	0.121691	1.97528	0.0482368	0.999982	Snx20
ENSMUSG00000056025	2.1284	-3.47362	1.75908	-1.97468	0.0483044	0.999982	Clca3a1
ENSMUSG00000069273	21.5822	0.95538	0.484012	1.97388	0.0483957	0.999982	H3c6
ENSMUSG00000032777	2022.81	0.157358	0.0797467	1.97322	0.0484704	0.999982	Gtf3c1
ENSMUSG00000004098	12.4394	-1.36566	0.692494	-1.97208	0.0485999	0.999982	Col5a3
ENSMUSG00000026014	359.791	0.29181	0.147992	1.97179	0.0486335	0.999982	Raph1
ENSMUSG00000000568	6978.33	-0.105786	0.0536544	-1.97162	0.0486526	0.999982	Hnrnpd
ENSMUSG00000030123	396.898	0.226511	0.114908	1.97124	0.048696	0.999982	Plxnd1
ENSMUSG00000030149	6.09371	2.04631	1.03865	1.97016	0.0488196	0.999982	Klrk1
ENSMUSG00000062981	1252.13	-0.169707	0.0861849	-1.9691	0.0489412	0.999982	Mrpl42
ENSMUSG00000028759	1400.19	0.156686	0.0796376	1.96749	0.0491272	0.999982	Hp1bp3
ENSMUSG00000025555	364.645	-0.271008	0.137977	-1.96416	0.049512	0.999982	Farp1
ENSMUSG00000039217	2.83286	-2.91924	1.48721	-1.96289	0.0496585	0.999982	Il18
ENSMUSG00000049233	13.1792	-1.19753	0.61016	-1.96265	0.049687	0.999982	Apoo-ps
ENSMUSG00000026070	71.2511	0.616238	0.314069	1.96211	0.0497496	0.999982	Il18r1
ENSMUSG00000029201	856.144	-0.190462	0.0970737	-1.96203	0.0497585	0.999982	Ugdh
ENSMUSG00000024597	832.659	0.181378	0.0925022	1.9608	0.0499026	0.999982	Slc12a2
ENSMUSG00000090164	8.7433	1.46438	0.74715	1.95995	0.0500014	0.999982	BC035044
ENSMUSG00000058672	163.272	0.360761	0.18412	1.95938	0.0500687	0.999982	Tubb2a
ENSMUSG00000023110	2608.61	0.133068	0.0679358	1.95873	0.0501444	0.999982	Prmt5
ENSMUSG00000038542	700.129	0.177131	0.0904369	1.95862	0.0501575	0.999982	Pcid2
ENSMUSG00000027109	1421.7	0.149472	0.0763481	1.95777	0.0502575	0.999982	Sp3
ENSMUSG00000117621	36.9139	-0.768984	0.392903	-1.95719	0.0503256	0.999982	Hspe1-rs1
ENSMUSG00000020108	754.583	-0.19755	0.100944	-1.95703	0.0503445	0.999982	Ddit4
ENSMUSG00000092134	113.442	0.414005	0.211671	1.95589	0.0504779	0.999982	Gm17089
ENSMUSG00000046031	251.301	-0.351665	0.179911	-1.95467	0.0506226	0.999982	Calhm6
ENSMUSG00000031822	573.744	0.200375	0.102534	1.95424	0.0506732	0.999982	Gse1
ENSMUSG00000035150	3276.74	0.123923	0.0634783	1.95221	0.0509132	0.999982	Eif2s3x
ENSMUSG00000031848	2626.07	-0.143128	0.0733324	-1.95178	0.0509647	0.999982	Lsm4
ENSMUSG00000066151	542.287	0.19975	0.102382	1.95103	0.0510532	0.999982	Fkbp15
ENSMUSG00000117872	570.39	0.198771	0.101898	1.95068	0.0510951	0.999982	A530088E08Rik
ENSMUSG00000094463	4.46033	2.12289	1.08873	1.94988	0.0511908	0.999982	Gm8546
ENSMUSG00000055805	2769.7	0.141209	0.0724573	1.94886	0.0513121	0.999982	Fmnl1
ENSMUSG00000003031	296.891	-0.252919	0.129805	-1.94845	0.0513607	0.999982	Cdkn1b
ENSMUSG00000061718	8.3821	1.51852	0.779449	1.94819	0.0513917	0.999982	Ppp1r1b
ENSMUSG00000079225	223.958	-0.341254	0.17518	-1.94802	0.0514124	0.999982	NA
ENSMUSG00000082062	24.8087	-1.05571	0.541971	-1.9479	0.051427	0.999982	NA
ENSMUSG00000084013	62.1473	-0.735907	0.377884	-1.94744	0.0514818	0.999982	NA
ENSMUSG00000080002	52.7981	-0.580245	0.298008	-1.94708	0.051525	0.999982	NA
ENSMUSG00000037111	690.81	0.213245	0.109555	1.94647	0.0515982	0.999982	Setd7
ENSMUSG00000021806	17.882	-1.06743	0.548394	-1.94646	0.0515991	0.999982	Nid2
ENSMUSG00000086573	2.27591	-3.57916	1.8394	-1.94583	0.0516749	0.999982	NA
ENSMUSG00000059674	27.2097	0.792738	0.407552	1.94512	0.0517601	0.999982	Cdh24
ENSMUSG00000030887	457.242	-0.221633	0.114014	-1.94391	0.051906	0.999982	Pdzd9
ENSMUSG00000024521	102.234	0.443276	0.228043	1.94383	0.0519162	0.999982	Pmaip1
ENSMUSG00000087107	628.297	-0.194244	0.100007	-1.9423	0.0521014	0.999982	AI662270
ENSMUSG00000104623	55.9427	-0.793565	0.408765	-1.94137	0.0522134	0.999982	Gm6394
ENSMUSG00000109491	2.11849	3.4503	1.77967	1.93873	0.052534	0.999982	NA
ENSMUSG00000021240	70.3042	0.501479	0.258895	1.937	0.0527453	0.999982	Abcd4
ENSMUSG00000035390	3.30292	-2.50593	1.29579	-1.9339	0.0531253	0.999982	Brsk1
ENSMUSG00000024208	417.517	-0.286035	0.147908	-1.93387	0.0531294	0.999982	Uqcc2
ENSMUSG00000039086	31.8038	-0.720992	0.372997	-1.93297	0.0532399	0.999982	Ss18l1
ENSMUSG00000086192	219.107	0.298866	0.154674	1.93224	0.0533305	0.999982	NA
ENSMUSG00000106696	166.072	0.352964	0.182702	1.93191	0.0533706	0.999982	NA
ENSMUSG00000036435	350.091	0.239203	0.12385	1.93139	0.0534346	0.999982	Exoc1
ENSMUSG00000006333	17178.8	-0.151	0.0782292	-1.93022	0.0535798	0.999982	Rps9
ENSMUSG00000029066	846.032	-0.172909	0.0896492	-1.92872	0.053765	0.999982	Mrpl20
ENSMUSG00000006050	628.038	-0.204474	0.106029	-1.92848	0.0537955	0.999982	Sra1
ENSMUSG00000028967	165.439	-0.381919	0.198124	-1.92768	0.0538949	0.999982	Errfi1
ENSMUSG00000039126	6.50009	1.74787	0.908293	1.92435	0.054311	0.999982	Prune2
ENSMUSG00000029417	3.44617	2.5766	1.33982	1.92309	0.0544687	0.999982	Cxcl9
ENSMUSG00000121136	2.98689	-3.01518	1.56828	-1.92261	0.0545297	0.999982	NA
ENSMUSG00000027933	1560.62	0.137544	0.0715411	1.92259	0.0545309	0.999982	Ints3
ENSMUSG00000033768	2.84349	2.92793	1.52293	1.92256	0.0545352	0.999982	Nrxn2
ENSMUSG00000017390	19.0196	-1.10439	0.574952	-1.92083	0.0547525	0.999982	Aldoc
ENSMUSG00000022039	7.86149	-1.5518	0.809443	-1.91712	0.0552229	0.999982	Adam2
ENSMUSG00000027247	996.906	0.161695	0.0843695	1.91651	0.0553008	0.999982	Arhgap1
ENSMUSG00000030879	766.071	-0.195268	0.10191	-1.91608	0.0553551	0.999982	Mrpl17
ENSMUSG00000103900	62.7427	0.525655	0.274541	1.91467	0.0555351	0.999982	Gm37500
ENSMUSG00000032966	6666.67	-0.129576	0.0677647	-1.91215	0.0558576	0.999982	Fkbp1a
ENSMUSG00000038290	498.974	0.221239	0.115705	1.9121	0.0558637	0.999982	Smg6
ENSMUSG00000008393	457.918	0.218614	0.114342	1.91194	0.0558837	0.999982	Carhsp1
ENSMUSG00000003847	1533.28	0.185127	0.0969048	1.9104	0.0560812	0.999982	Nfat5
ENSMUSG00000004610	17.8671	-0.990222	0.518361	-1.91029	0.0560956	0.999982	Etfb
ENSMUSG00000031010	3154.69	0.133854	0.0700993	1.90949	0.0561989	0.999982	Usp9x
ENSMUSG00000079641	4688.75	-0.177823	0.0931261	-1.90949	0.0561991	0.999982	Rpl39
ENSMUSG00000081769	15.8484	1.10633	0.579567	1.9089	0.0562755	0.999982	Gm12216
ENSMUSG00000028871	1.343	-3.88007	2.03269	-1.90883	0.0562838	NA	Rspo1
ENSMUSG00000026192	5171.75	0.106185	0.055672	1.90733	0.0564785	0.999982	Atic
ENSMUSG00000072437	152.194	-0.357444	0.187474	-1.90663	0.0565684	0.999982	Nanos1
ENSMUSG00000034111	540.566	0.202471	0.10624	1.9058	0.0566765	0.999982	Tmed8
ENSMUSG00000022701	62.7777	0.525616	0.275872	1.90529	0.0567423	0.999982	Ccdc191
ENSMUSG00000114708	9.82808	-1.30987	0.687542	-1.90516	0.0567598	0.999982	NA
ENSMUSG00000037999	444.857	0.247	0.129694	1.90449	0.0568464	0.999982	Arap2
ENSMUSG00000048445	24.7811	-0.844822	0.444241	-1.90172	0.0572076	0.999982	Ccdc57
ENSMUSG00000039405	15.1237	-1.03295	0.543435	-1.90077	0.0573317	0.999982	Prss23
ENSMUSG00000020525	537.017	0.194342	0.10233	1.89917	0.0575419	0.999982	Ppm1d
ENSMUSG00000040459	832.14	-0.20217	0.106452	-1.89916	0.0575429	0.999982	Arglu1
ENSMUSG00000018068	721.049	0.18232	0.0961061	1.89707	0.0578181	0.999982	Ints2
ENSMUSG00000117792	1.32472	-3.86371	2.03893	-1.89497	0.0580969	NA	NA
ENSMUSG00000029426	559.053	0.193315	0.102089	1.8936	0.0582787	0.999982	Scarb2
ENSMUSG00000020091	4109.18	0.115764	0.0611716	1.89244	0.0584322	0.999982	Eif4ebp2
ENSMUSG00000092072	30.2225	-0.836087	0.442061	-1.89134	0.0585795	0.999982	Gm4540
ENSMUSG00000084786	1415.87	-0.182779	0.0967072	-1.89003	0.0587542	0.999982	Ubl5
ENSMUSG00000028383	329.084	0.245109	0.129732	1.88934	0.0588461	0.999982	Hsdl2
ENSMUSG00000076441	2061.62	0.169164	0.0895696	1.88863	0.0589413	0.999982	Ass1
ENSMUSG00000046844	4.93608	-2.02784	1.07406	-1.88801	0.0590241	0.999982	Vat1l
ENSMUSG00000096600	1.96705	3.33801	1.7696	1.88631	0.0592535	0.999982	Trav6d-3
ENSMUSG00000033596	2531.98	0.12064	0.0639735	1.88577	0.0593255	0.999982	Rfwd3
ENSMUSG00000082154	1.98005	3.34064	1.77214	1.88509	0.0594179	0.999982	NA
ENSMUSG00000096856	5.81168	1.76143	0.934603	1.88469	0.0594721	0.999982	Gm10778
ENSMUSG00000026068	107.764	0.448093	0.237768	1.88458	0.0594865	0.999982	Il18rap
ENSMUSG00000036782	1.36168	-3.89678	2.06846	-1.88391	0.0595776	0.999982	Klhl13
ENSMUSG00000037152	382.954	-0.271416	0.144225	-1.8819	0.0598498	0.999982	Ndufc1
ENSMUSG00000028998	598.17	-0.272198	0.144663	-1.88161	0.0598895	0.999982	Tomm7
ENSMUSG00000035268	148.844	-0.332584	0.176775	-1.88139	0.0599185	0.999982	Pkig
ENSMUSG00000004105	1422.81	-0.185663	0.0987067	-1.88096	0.0599772	0.999982	Angptl2
ENSMUSG00000046330	4658.56	-0.111149	0.0591386	-1.87946	0.0601814	0.999982	Rpl37a
ENSMUSG00000022425	23.0993	-0.925926	0.493016	-1.87808	0.0603696	0.999982	Enpp2
ENSMUSG00000115505	27.398	-0.783498	0.41734	-1.87736	0.0604684	0.999982	NA
ENSMUSG00000015950	270.075	0.280665	0.149586	1.87628	0.0606166	0.999982	Ncf1
ENSMUSG00000017144	19.7675	-0.927016	0.494076	-1.87626	0.0606193	0.999982	Rnd3
ENSMUSG00000095588	22.9915	-0.943425	0.502867	-1.87609	0.0606424	0.999982	NA
ENSMUSG00000035585	528.387	-0.204725	0.109127	-1.87603	0.0606516	0.999982	Tsen34
ENSMUSG00000041313	3827.13	0.120201	0.064111	1.87488	0.060809	0.999982	Slc7a1
ENSMUSG00000021585	1209.97	0.151124	0.0806474	1.87388	0.060947	0.999982	Cast
ENSMUSG00000073434	309.73	0.237849	0.126935	1.87379	0.060959	0.999982	Wdr90
ENSMUSG00000025085	3942.41	0.113918	0.0608045	1.87351	0.0609985	0.999982	Ablim1
ENSMUSG00000029673	5.84522	-1.78704	0.953875	-1.87345	0.0610064	0.999982	Auts2
ENSMUSG00000027346	223.31	0.308363	0.164633	1.87303	0.0610639	0.999982	Gpcpd1
ENSMUSG00000062762	1435.55	0.174518	0.0932254	1.872	0.0612064	0.999982	Ei24
ENSMUSG00000022105	604.554	0.192121	0.102636	1.87187	0.0612252	0.999982	Rb1
ENSMUSG00000005824	292.26	-0.302787	0.161813	-1.87121	0.0613153	0.999982	Tnfsf14
ENSMUSG00000029844	1.45478	-4.00351	2.13961	-1.87114	0.0613257	0.999982	Hoxa1
ENSMUSG00000026229	3160.62	0.122188	0.0653132	1.87081	0.0613715	0.999982	Psmd1
ENSMUSG00000024810	16.4096	1.24801	0.667245	1.8704	0.061429	0.999982	Il33
ENSMUSG00000016756	378.008	0.230851	0.123527	1.86884	0.0616456	0.999982	Cmah
ENSMUSG00000034379	211.631	-0.353285	0.189059	-1.86865	0.0616717	0.999982	Wdr5b
ENSMUSG00000060314	1.32513	-3.86388	2.06779	-1.86861	0.061677	NA	Zfp941
ENSMUSG00000042763	26.3695	-0.935397	0.500712	-1.86813	0.0617433	0.999982	Maneal
ENSMUSG00000032128	5.29746	1.84031	0.985713	1.86698	0.0619043	0.999982	Robo3
ENSMUSG00000108852	1.30992	3.83477	2.05408	1.8669	0.0619153	NA	NA
ENSMUSG00000092626	57.361	-0.528822	0.283268	-1.86687	0.0619203	0.999982	NA
ENSMUSG00000035232	624.61	-0.210984	0.113047	-1.86633	0.0619954	0.999982	Pdk3
ENSMUSG00000030091	4343.35	0.126742	0.0679793	1.86442	0.0622623	0.999982	Nup210
ENSMUSG00000051329	2283.38	0.136363	0.0731423	1.86436	0.0622715	0.999982	Nup160
ENSMUSG00000030336	556.877	-0.193881	0.104041	-1.8635	0.0623921	0.999982	Cd27
ENSMUSG00000028048	226.009	0.29172	0.156609	1.86272	0.0625016	0.999982	Gba
ENSMUSG00000105081	3.41663	-2.54535	1.36659	-1.86256	0.0625239	0.999982	NA
ENSMUSG00000031309	1984.01	0.14192	0.0762042	1.86236	0.0625526	0.999982	Rps6ka3
ENSMUSG00000027184	8912.99	0.0949236	0.0510093	1.86091	0.0627571	0.999982	Caprin1
ENSMUSG00000056919	145.601	0.358528	0.192675	1.86079	0.0627736	0.999982	Cep162
ENSMUSG00000032020	1656.4	-0.166936	0.0899348	-1.85618	0.0634272	0.999982	Ubash3b
ENSMUSG00000047888	700.243	0.19689	0.106139	1.85502	0.0635927	0.999982	Tnrc6b
ENSMUSG00000056055	3.78595	-2.24289	1.20974	-1.85403	0.0637343	0.999982	Sag
ENSMUSG00000118365	11.5832	-1.32062	0.712781	-1.85277	0.063915	0.999982	NA
ENSMUSG00000090150	138.273	0.350278	0.189084	1.85249	0.063955	0.999982	Acad11
ENSMUSG00000026134	672.371	-0.176542	0.0953323	-1.85186	0.0640464	0.999982	Prim2
ENSMUSG00000030671	649.164	0.185205	0.100075	1.85065	0.0642194	0.999982	Pde3b
ENSMUSG00000043441	2.00525	3.36265	1.81861	1.84902	0.0644545	0.999982	Gpr149
ENSMUSG00000100794	12.4413	-1.10367	0.597826	-1.84614	0.0648713	0.999982	NA
ENSMUSG00000086784	421.933	-0.212767	0.115335	-1.84477	0.0650708	0.999982	Isoc2a
ENSMUSG00000040133	24.7403	-0.785486	0.425916	-1.84423	0.0651496	0.999982	Gpr176
ENSMUSG00000051355	50.0118	-0.552001	0.299326	-1.84414	0.0651621	0.999982	Commd1
ENSMUSG00000037820	111.967	-0.425568	0.230797	-1.84391	0.0651965	0.999982	Tgm2
ENSMUSG00000006205	28.1801	-0.791537	0.429385	-1.84342	0.0652675	0.999982	Htra1
ENSMUSG00000067851	2244.6	0.134783	0.0731915	1.84152	0.0655459	0.999982	Arfgef1
ENSMUSG00000034158	1101.2	0.150496	0.0817717	1.84044	0.0657036	0.999982	Lrrc58
ENSMUSG00000117634	65.2438	0.494236	0.268687	1.83945	0.065849	0.999982	NA
ENSMUSG00000028648	290.551	-0.245799	0.13373	-1.83802	0.0660589	0.999982	Ndufs5
ENSMUSG00000042320	24.4191	0.79126	0.430506	1.83797	0.0660663	0.999982	Prox2
ENSMUSG00000040713	179.142	0.303772	0.165315	1.83753	0.0661316	0.999982	Creg1
ENSMUSG00000029547	2091.84	0.146018	0.07947	1.8374	0.0661504	0.999982	Ints1
ENSMUSG00000082705	9.17395	-1.29901	0.707103	-1.83708	0.0661979	0.999982	NA
ENSMUSG00000044211	32.9778	0.675404	0.367782	1.83643	0.0662947	0.999982	NA
ENSMUSG00000038173	1.29752	-3.8386	2.09124	-1.83556	0.0664223	NA	Enpp6
ENSMUSG00000050410	650.11	0.188309	0.102599	1.8354	0.0664469	0.999982	Tcf19
ENSMUSG00000110279	8356.34	-0.11479	0.0625428	-1.83539	0.0664481	0.999982	NA
ENSMUSG00000003226	4077.65	0.157484	0.0858254	1.83493	0.0665155	0.999982	Ranbp2
ENSMUSG00000075025	2.06736	-3.41726	1.86274	-1.83453	0.0665749	0.999982	Gm10804
ENSMUSG00000120863	4.68128	-1.89119	1.03096	-1.8344	0.0665954	0.999982	NA
ENSMUSG00000021972	283.15	0.245434	0.133875	1.83331	0.0667567	0.999982	Hmbox1
ENSMUSG00000060152	733.399	-0.187391	0.102224	-1.83315	0.0667809	0.999982	Pop5
ENSMUSG00000030399	1.94592	3.32418	1.81409	1.83242	0.0668892	0.999982	Ckm
ENSMUSG00000049553	2411.87	0.120991	0.066082	1.83092	0.0671124	0.999982	Polr1a
ENSMUSG00000044636	62.8919	-0.499115	0.272752	-1.82992	0.0672613	0.999982	Csrnp2
ENSMUSG00000067780	3.57522	-2.62052	1.43219	-1.82973	0.0672906	0.999982	Pi15
ENSMUSG00000020212	91.5844	0.42022	0.229702	1.82941	0.0673383	0.999982	Mdm1
ENSMUSG00000001444	1549.23	-0.148708	0.0813148	-1.82879	0.0674313	0.999982	Tbx21
ENSMUSG00000069206	136.118	0.349072	0.190895	1.82861	0.0674586	0.999982	Zfp874a
ENSMUSG00000030316	394.024	-0.222978	0.12202	-1.82739	0.0676419	0.999982	Tamm41
ENSMUSG00000090112	553.917	0.203204	0.111222	1.82702	0.067697	0.999982	Shprh
ENSMUSG00000035105	705.635	-0.536901	0.293949	-1.82651	0.0677734	0.999982	Egln3
ENSMUSG00000020741	3054.17	0.126206	0.0691259	1.82574	0.06789	0.999982	Cluh
ENSMUSG00000062006	5269.83	-0.142833	0.078276	-1.82473	0.0680418	0.999982	Rpl34
ENSMUSG00000062006	5269.83	-0.142833	0.078276	-1.82473	0.0680418	0.999982	Rpl34-ps1
ENSMUSG00000056724	591.336	0.211779	0.116062	1.82471	0.0680448	0.999982	Nbeal2
ENSMUSG00000083033	39.2337	-0.684404	0.375754	-1.82142	0.0685436	0.999982	Gm9083
ENSMUSG00000087356	94.6251	0.437307	0.24017	1.82082	0.068634	0.999982	NA
ENSMUSG00000115829	38.7763	0.707202	0.388453	1.82056	0.0686733	0.999982	NA
ENSMUSG00000031026	27.1793	0.795319	0.436854	1.82056	0.0686737	0.999982	Trim66
ENSMUSG00000034216	303.381	0.238764	0.131162	1.82038	0.0687017	0.999982	Vps18
ENSMUSG00000106918	57.5824	-0.530186	0.291423	-1.8193	0.0688658	0.999982	Mrpl33
ENSMUSG00000037940	3815.45	0.1413	0.0776694	1.81925	0.0688726	0.999982	Inpp4b
ENSMUSG00000026082	257.885	0.310814	0.170886	1.81883	0.0689367	0.999982	Rev1
ENSMUSG00000029104	1693.01	0.158963	0.0874112	1.81857	0.0689773	0.999982	Htt
ENSMUSG00000069520	409.262	0.224376	0.123439	1.81771	0.0691084	0.999982	Tmem19
ENSMUSG00000101133	1.9467	3.31869	1.82593	1.81753	0.0691353	0.999982	NA
ENSMUSG00000038193	4.70931	-1.89961	1.04539	-1.81712	0.0691984	0.999982	Hand2
ENSMUSG00000121163	4.29181	2.0651	1.13744	1.81557	0.0694367	0.999982	NA
ENSMUSG00000035545	314.738	0.266058	0.146547	1.81551	0.0694456	0.999982	Leng8
ENSMUSG00000052949	228.057	0.329735	0.181819	1.81353	0.0697494	0.999982	Rnf157
ENSMUSG00000087135	3.14969	-2.43032	1.34099	-1.81233	0.0699349	0.999982	NA
ENSMUSG00000012017	5.61772	-1.70668	0.941827	-1.81209	0.0699724	0.999982	Scarf2
ENSMUSG00000038056	506.124	0.267608	0.147706	1.81176	0.0700228	0.999982	Kmt2c
ENSMUSG00000030031	238.669	-0.272149	0.150291	-1.81082	0.0701689	0.999982	Kbtbd8
ENSMUSG00000026812	488.848	0.201763	0.11147	1.81002	0.0702924	0.999982	Tsc1
ENSMUSG00000061755	757.073	0.203778	0.112605	1.80967	0.070347	0.999982	Bod1l
ENSMUSG00000058831	3.16678	-2.41047	1.3323	-1.80926	0.0704114	0.999982	Opn1sw
ENSMUSG00000092596	735.928	0.166726	0.0922773	1.80679	0.0707951	0.999982	NA
ENSMUSG00000026923	3304.49	0.125278	0.0693829	1.80561	0.0709797	0.999982	Notch1
ENSMUSG00000039671	1217.79	0.147237	0.0815477	1.80553	0.0709923	0.999982	Zmynd8
ENSMUSG00000115497	15.3769	-1.04843	0.581031	-1.80442	0.0711648	0.999982	NA
ENSMUSG00000049076	753.553	0.186008	0.103174	1.80286	0.0714109	0.999982	Acap2
ENSMUSG00000030134	23.9747	0.836415	0.46413	1.80211	0.0715276	0.999982	Rasgef1a
ENSMUSG00000025647	4930.94	0.126843	0.0703922	1.80195	0.0715529	0.999982	Shisa5
ENSMUSG00000068463	25.3045	-0.766401	0.425642	-1.80057	0.0717699	0.999982	C730014E05Rik
ENSMUSG00000027765	37.5941	-0.630633	0.350323	-1.80015	0.0718374	0.999982	P2ry1
ENSMUSG00000021822	2.64651	2.79537	1.55331	1.79962	0.0719206	0.999982	Plau
ENSMUSG00000010830	40.349	-0.67978	0.377775	-1.79943	0.0719504	0.999982	Kdelr3
ENSMUSG00000009630	1642.24	-0.133514	0.0742012	-1.79936	0.0719622	0.999982	Ppp2cb
ENSMUSG00000030930	442.594	-0.230611	0.128201	-1.79883	0.0720455	0.999982	Chst15
ENSMUSG00000028005	47.0712	-0.568255	0.316023	-1.79815	0.0721537	0.999982	Gucy1b1
ENSMUSG00000110711	2370.19	0.119208	0.0663156	1.79758	0.0722429	0.999982	NA
ENSMUSG00000112567	19.9571	-1.0321	0.574182	-1.79751	0.0722545	0.999982	NA
ENSMUSG00000031132	1096.27	-0.211289	0.117586	-1.79689	0.072353	0.999982	Cd40lg
ENSMUSG00000045348	7.77616	-1.55265	0.864486	-1.79603	0.0724891	0.999982	Nyap1
ENSMUSG00000093661	135.011	-0.359451	0.200162	-1.7958	0.0725266	0.999982	Eif4e3
ENSMUSG00000091586	20.481	-0.852833	0.474934	-1.79569	0.0725445	0.999982	Cyp4f17
ENSMUSG00000035385	33.5296	-0.762203	0.424714	-1.79463	0.0727132	0.999982	Ccl2
ENSMUSG00000043298	4.66635	1.8626	1.03807	1.79428	0.0727679	0.999982	Smco3
ENSMUSG00000019838	421.97	0.214034	0.119344	1.79342	0.0729065	0.999982	Slc16a10
ENSMUSG00000080939	1.29324	3.81903	2.12957	1.79333	0.0729199	NA	Gm9208
ENSMUSG00000078713	1145.59	-0.158587	0.088465	-1.79265	0.0730291	0.999982	Tomm5
ENSMUSG00000021488	1885.92	0.15494	0.0865762	1.78964	0.0735116	0.999982	Nsd1
ENSMUSG00000018909	203.198	-0.287578	0.160777	-1.78868	0.0736672	0.999982	Arrb1
ENSMUSG00000031626	5.48605	-1.65249	0.923923	-1.78856	0.0736851	0.999982	Sorbs2
ENSMUSG00000000290	4007.31	0.10901	0.0609664	1.78803	0.0737706	0.999982	Itgb2
ENSMUSG00000060034	1.3702	-3.9055	2.18616	-1.78646	0.0740242	0.999982	Ctf2
ENSMUSG00000031740	35.2527	-0.795158	0.445586	-1.78452	0.0743387	0.999982	Mmp2
ENSMUSG00000073888	12.5679	-1.187	0.666388	-1.78125	0.0748717	0.999982	Ccl27a
ENSMUSG00000073888	12.5679	-1.187	0.666388	-1.78125	0.0748717	0.999982	Gm13306
ENSMUSG00000073888	12.5679	-1.187	0.666388	-1.78125	0.0748717	0.999982	Ccl27b
ENSMUSG00000026748	48.1044	0.539657	0.30309	1.78052	0.0749911	0.999982	Plxdc2
ENSMUSG00000015023	2326.77	0.116201	0.0652848	1.77991	0.0750907	0.999982	Ddx19a
ENSMUSG00000106895	12.0592	-1.18372	0.665142	-1.77965	0.075133	0.999982	Gm4754
ENSMUSG00000023967	608.367	-0.183867	0.103523	-1.77609	0.0757173	0.999982	Mrps18a
ENSMUSG00000013465	893.064	0.158473	0.0892394	1.77582	0.0757629	0.999982	Nelfb
ENSMUSG00000034333	375.332	0.208863	0.117634	1.77553	0.0758108	0.999982	Zbed4
ENSMUSG00000114147	1.82494	3.2099	1.80868	1.77472	0.0759436	0.999982	NA
ENSMUSG00000079941	83.1565	-0.571353	0.321981	-1.77449	0.0759822	0.999982	Cox5b-ps
ENSMUSG00000039158	1102.61	0.140886	0.0794126	1.7741	0.0760464	0.999982	Akna
ENSMUSG00000017774	947.518	0.158254	0.0892034	1.77407	0.0760508	0.999982	Myo1c
ENSMUSG00000065999	3.19282	2.39408	1.34989	1.77353	0.0761403	0.999982	Zfp985
ENSMUSG00000080896	15.7708	-0.984208	0.555088	-1.77307	0.0762177	0.999982	NA
ENSMUSG00000078153	306.408	-0.329602	0.185898	-1.77302	0.0762248	0.999982	Psme2b
ENSMUSG00000029204	721.286	-0.164975	0.0930676	-1.77264	0.076289	0.999982	Rhoh
ENSMUSG00000048528	3.68636	-2.17224	1.22605	-1.77174	0.0764375	0.999982	Nkx1-2
ENSMUSG00000075010	613.86	-0.180366	0.101816	-1.77149	0.0764799	0.999982	AW112010
ENSMUSG00000022064	537.179	0.193203	0.10911	1.77073	0.0766061	0.999982	Pibf1
ENSMUSG00000036199	837.415	-0.221197	0.124942	-1.7704	0.076661	0.999982	Ndufa13
ENSMUSG00000026048	318.515	0.24375	0.137726	1.76982	0.0767565	0.999982	Ercc5
ENSMUSG00000030249	1.37102	-3.90614	2.20719	-1.76974	0.0767712	0.999982	Abcc9
ENSMUSG00000095042	12.7034	-1.12349	0.635012	-1.76924	0.076853	0.999982	Gm12537
ENSMUSG00000017291	528.169	0.215393	0.12175	1.76915	0.0768693	0.999982	Taok1
ENSMUSG00000033902	117.935	0.355515	0.20097	1.769	0.0768942	0.999982	Mapkbp1
ENSMUSG00000106588	55.8666	0.519075	0.293517	1.76847	0.0769832	0.999982	NA
ENSMUSG00000031517	4.49234	-1.82143	1.03009	-1.76823	0.0770227	0.999982	Gpm6a
ENSMUSG00000023973	318.614	-0.224459	0.127123	-1.76569	0.0774482	0.999982	Cnpy3
ENSMUSG00000030766	517.81	-0.202554	0.114752	-1.76514	0.07754	0.999982	Arhgap17
ENSMUSG00000101262	35.115	-0.68557	0.38845	-1.76489	0.0775827	0.999982	NA
ENSMUSG00000024604	1071.97	0.142771	0.0810473	1.76157	0.0781414	0.999982	Rbm22
ENSMUSG00000055024	1271.85	0.162386	0.0922195	1.76087	0.0782611	0.999982	Ep300
ENSMUSG00000021752	40.5944	-0.590548	0.335514	-1.76013	0.0783855	0.999982	Kctd6
ENSMUSG00000033910	82.6243	0.43361	0.24636	1.76006	0.078397	0.999982	Gucy1a1
ENSMUSG00000020982	829.225	0.172015	0.0979013	1.75703	0.0789129	0.999982	Nemf
ENSMUSG00000028382	4017.34	0.103339	0.0588472	1.75606	0.0790783	0.999982	Ptbp3
ENSMUSG00000025508	9645.54	-0.146244	0.0833143	-1.75533	0.0792028	0.999982	Rplp2
ENSMUSG00000020536	538.95	0.182396	0.103934	1.75492	0.0792726	0.999982	Llgl1
ENSMUSG00000082431	6.31802	-1.49416	0.85157	-1.75459	0.0793291	0.999982	NA
ENSMUSG00000110129	6.5659	-1.58893	0.905659	-1.75444	0.0793548	0.999982	NA
ENSMUSG00000035184	6.44203	1.51348	0.863025	1.75369	0.0794832	0.999982	Fam124a
ENSMUSG00000102030	1.79488	3.1951	1.82207	1.75356	0.0795061	0.999982	NA
ENSMUSG00000095524	70.0076	-0.469881	0.267978	-1.75343	0.0795285	0.999982	Gm15682
ENSMUSG00000048047	613.772	0.177751	0.101374	1.75342	0.0795303	0.999982	Zbtb33
ENSMUSG00000082064	62.9728	-0.519689	0.29681	-1.75091	0.0799608	0.999982	Rpl5-ps2
ENSMUSG00000034908	2044.98	0.149847	0.0855949	1.75065	0.0800058	0.999982	Sidt2
ENSMUSG00000031274	16.3041	-0.921159	0.52625	-1.75042	0.0800457	0.999982	Col4a5
ENSMUSG00000050315	2.48208	2.7081	1.54749	1.75	0.080119	0.999982	Synpo2
ENSMUSG00000031146	1163	0.161902	0.0925242	1.74984	0.0801463	0.999982	Plp2
ENSMUSG00000010406	452.074	-0.234626	0.134186	-1.74852	0.0803741	0.999982	Mrpl52
ENSMUSG00000034009	1.33474	3.85784	2.20661	1.74831	0.0804106	NA	Rxfp1
ENSMUSG00000090137	102.525	-0.374425	0.214195	-1.74806	0.080454	0.999982	Uba52
ENSMUSG00000029020	951.147	0.143339	0.082014	1.74774	0.0805087	0.999982	Mfn2
ENSMUSG00000115194	18.3731	-0.891687	0.510289	-1.74741	0.0805655	0.999982	Gm48909
ENSMUSG00000090038	78.52	0.446477	0.255645	1.74647	0.0807293	0.999982	Gm16573
ENSMUSG00000092349	4.48258	-1.81848	1.04241	-1.7445	0.0810728	0.999982	Smim40
ENSMUSG00000002897	918.903	0.156908	0.0899947	1.74352	0.0812426	0.999982	Il17ra
ENSMUSG00000073002	44.3649	0.563581	0.323243	1.74352	0.0812431	0.999982	Vamp5
ENSMUSG00000029027	183.286	0.283542	0.16269	1.74284	0.0813612	0.999982	Dffb
ENSMUSG00000027698	294.112	0.239191	0.137292	1.74221	0.0814714	0.999982	Nceh1
ENSMUSG00000031627	892.233	0.16158	0.0927819	1.74151	0.0815948	0.999982	Irf2
ENSMUSG00000042541	1041.99	-0.197557	0.113448	-1.74138	0.0816163	0.999982	Sem1
ENSMUSG00000001419	1097.46	0.168532	0.0968408	1.7403	0.0818067	0.999982	Mef2d
ENSMUSG00000033970	627.684	-0.172086	0.0988831	-1.74029	0.0818073	0.999982	Rfc3
ENSMUSG00000002565	6.77921	1.4383	0.827153	1.73886	0.08206	0.999982	Scin
ENSMUSG00000109669	8.31641	-1.35562	0.779711	-1.73862	0.0821023	0.999982	NA
ENSMUSG00000020180	2282.28	-0.114514	0.065868	-1.73853	0.0821171	0.999982	Snrpd3
ENSMUSG00000028232	323.78	0.232175	0.133558	1.73838	0.0821434	0.999982	Tmem68
ENSMUSG00000049892	5.13991	1.75886	1.01219	1.73768	0.0822671	0.999982	Rasd1
ENSMUSG00000027364	7.37116	-1.5743	0.906023	-1.7376	0.0822815	0.999982	Usp50
ENSMUSG00000027347	1243.34	0.154806	0.0890999	1.73744	0.0823095	0.999982	Rasgrp1
ENSMUSG00000031381	213.122	-0.26223	0.150943	-1.73727	0.0823393	0.999982	Piga
ENSMUSG00000025747	1161.31	-0.147157	0.0847319	-1.73674	0.0824334	0.999982	Tyms
ENSMUSG00000091867	1.17639	-3.68866	2.12486	-1.73595	0.0825719	NA	Cyp2a22
ENSMUSG00000117884	1.17639	-3.68866	2.12486	-1.73595	0.0825719	NA	NA
ENSMUSG00000067389	1405.88	0.149042	0.0858677	1.73572	0.0826137	0.999982	NA
ENSMUSG00000025507	283.61	0.228958	0.131967	1.73497	0.0827464	0.999982	Pidd1
ENSMUSG00000025389	1.30604	-3.846	2.21776	-1.73418	0.0828862	NA	Mip
ENSMUSG00000038738	1.30604	-3.846	2.21776	-1.73418	0.0828862	NA	Shank1
ENSMUSG00000114687	30.32	-0.673986	0.388697	-1.73396	0.0829249	0.999982	NA
ENSMUSG00000029001	29.8832	0.764139	0.440829	1.73341	0.083022	0.999982	Fbxo44
ENSMUSG00000048163	2179.83	0.143974	0.0830856	1.73283	0.0831251	0.999982	Selplg
ENSMUSG00000009828	115.756	0.345233	0.199283	1.73238	0.0832068	0.999982	Cilk1
ENSMUSG00000026436	788.926	0.162785	0.0940244	1.73131	0.0833966	0.999982	Elk4
ENSMUSG00000097275	862.634	0.155295	0.0897353	1.73059	0.0835243	0.999982	NA
ENSMUSG00000029072	14.2346	0.962818	0.556415	1.73039	0.0835599	0.999982	Tas1r3
ENSMUSG00000085808	60.7741	-0.525909	0.303978	-1.73009	0.0836139	0.999982	Gm14718
ENSMUSG00000033350	1949.73	-0.166828	0.096483	-1.72909	0.0837926	0.999982	Chst2
ENSMUSG00000028693	2445.11	-0.129371	0.0748253	-1.72897	0.0838143	0.999982	Nasp
ENSMUSG00000063358	3274.71	0.105836	0.0612167	1.72887	0.0838324	0.999982	Mapk1
ENSMUSG00000112148	1.16705	-3.67922	2.12897	-1.72817	0.0839576	NA	Lilrb4a
ENSMUSG00000021215	824.368	-0.161231	0.0933176	-1.72776	0.0840304	0.999982	Net1
ENSMUSG00000078162	1.19467	-3.70734	2.14615	-1.72744	0.0840888	NA	Gm2574
ENSMUSG00000000631	572.816	0.174342	0.100946	1.72708	0.0841526	0.999982	Myo18a
ENSMUSG00000037805	7095.29	-0.108806	0.0630051	-1.72694	0.0841789	0.999982	Rpl10a
ENSMUSG00000096233	1.18532	-3.6979	2.14154	-1.72675	0.0842123	NA	Gm13238
ENSMUSG00000116414	7.6558	1.67171	0.968323	1.7264	0.0842752	0.999982	NA
ENSMUSG00000080845	21.1196	-0.84129	0.487331	-1.72632	0.0842896	0.999982	NA
ENSMUSG00000105944	3.96746	-1.92931	1.11835	-1.72514	0.0845015	0.999982	NA
ENSMUSG00000093849	14.0203	-1.01364	0.587594	-1.72506	0.0845161	0.999982	NA
ENSMUSG00000041112	1719.98	0.127508	0.0739192	1.72496	0.0845341	0.999982	Elmo1
ENSMUSG00000055725	69.1023	0.466746	0.270771	1.72377	0.0847501	0.999982	Paqr3
ENSMUSG00000071041	141.521	-0.344543	0.199923	-1.72338	0.0848202	0.999982	Impdh2-ps
ENSMUSG00000006715	777.591	-0.155811	0.0904318	-1.72297	0.0848936	0.999982	Gmnn
ENSMUSG00000075470	1238.77	0.131887	0.0765656	1.72254	0.0849721	0.999982	Alg10b
ENSMUSG00000048126	43.7424	0.552291	0.320681	1.72224	0.0850252	0.999982	Col6a3
ENSMUSG00000032224	33.4502	-0.666514	0.387063	-1.72198	0.0850739	0.999982	Fam81a
ENSMUSG00000067377	57.8657	-0.515607	0.29958	-1.7211	0.085232	0.999982	Tspan6
ENSMUSG00000056342	3378.29	0.131802	0.0765889	1.7209	0.0852693	0.999982	Usp34
ENSMUSG00000105471	3.99875	-1.92553	1.11919	-1.72047	0.085347	0.999982	NA
ENSMUSG00000095512	1.28818	-3.82885	2.22564	-1.72034	0.0853713	NA	Gm17222
ENSMUSG00000104272	1.29286	3.81828	2.21979	1.7201	0.0854137	NA	NA
ENSMUSG00000022992	810.779	-0.15031	0.087411	-1.71958	0.0855093	0.999982	Kansl2
ENSMUSG00000066270	29.6718	-0.772183	0.449333	-1.71851	0.0857037	0.999982	NA
ENSMUSG00000107019	8.18054	1.30683	0.760452	1.7185	0.0857061	0.999982	NA
ENSMUSG00000040139	58.3666	-0.480763	0.279801	-1.71823	0.0857542	0.999982	9430038I01Rik
ENSMUSG00000044098	659.789	-0.164947	0.09605	-1.71731	0.0859229	0.999982	Rsbn1
ENSMUSG00000027324	307.038	0.221204	0.128831	1.71701	0.0859775	0.999982	Rpusd2
ENSMUSG00000029723	1450.84	-0.124727	0.0726585	-1.71662	0.0860489	0.999982	Spacdr
ENSMUSG00000029723	1450.84	-0.124727	0.0726585	-1.71662	0.0860489	0.999982	LOC122152370
ENSMUSG00000029723	1450.84	-0.124727	0.0726585	-1.71662	0.0860489	0.999982	LOC122152371
ENSMUSG00000020532	2661.45	0.118253	0.0689373	1.71537	0.0862776	0.999982	Acaca
ENSMUSG00000052794	312.506	0.218636	0.127508	1.71468	0.0864036	0.999982	1700030K09Rik
ENSMUSG00000028271	508.253	-0.188767	0.110184	-1.7132	0.0866752	0.999982	Gtf2b
ENSMUSG00000028860	38.5569	0.665174	0.3885	1.71216	0.0868674	0.999982	Sytl1
ENSMUSG00000120373	1.16746	-3.67948	2.14939	-1.71187	0.086921	NA	Gm30603
ENSMUSG00000022337	419.331	-0.190476	0.111383	-1.7101	0.0872477	0.999982	Emc2
ENSMUSG00000116879	5.2975	-1.59785	0.93464	-1.70959	0.0873418	0.999982	NA
ENSMUSG00000026582	1.15442	3.65074	2.1356	1.70947	0.0873648	NA	Sele
ENSMUSG00000001017	2550.73	-0.109417	0.0640371	-1.70865	0.087515	0.999982	Chtop
ENSMUSG00000020657	176.416	0.2967	0.173647	1.70864	0.0875182	0.999982	Dnajc27
ENSMUSG00000007613	313.719	0.23557	0.137882	1.70849	0.0875456	0.999982	Tgfbr1
ENSMUSG00000039270	58.1755	0.496633	0.290792	1.70786	0.0876616	0.999982	Megf9
ENSMUSG00000035960	1687.12	-0.122961	0.0720116	-1.70752	0.0877255	0.999982	Apex1
ENSMUSG00000034075	1716.41	0.120888	0.0708152	1.7071	0.0878039	0.999982	Zdhhc5
ENSMUSG00000043241	764.425	0.158103	0.0926682	1.70612	0.0879858	0.999982	Upf2
ENSMUSG00000026021	1788.21	-0.119898	0.0703495	-1.70432	0.0883204	0.999982	Sumo1
ENSMUSG00000113303	1.16702	3.66378	2.15058	1.70362	0.0884518	NA	NA
ENSMUSG00000042333	132.815	-0.315744	0.185377	-1.70325	0.0885215	0.999982	Tnfrsf14
ENSMUSG00000025144	398.198	-0.20503	0.120377	-1.70323	0.0885246	0.999982	Cenpx
ENSMUSG00000023018	607.772	0.167531	0.0983671	1.70312	0.0885458	0.999982	Smarcd1
ENSMUSG00000024122	1436.88	0.134077	0.0787344	1.7029	0.0885874	0.999982	Pdpk1
ENSMUSG00000019970	31.4709	0.679037	0.398883	1.70235	0.0886906	0.999982	Sgk1
ENSMUSG00000032562	5538.41	0.121305	0.0712616	1.70225	0.0887083	0.999982	Gnai2
ENSMUSG00000056771	1.17148	3.66833	2.15725	1.70047	0.0890434	NA	NA
ENSMUSG00000113211	3.95082	-1.93309	1.13685	-1.7004	0.0890565	0.999982	4921525O09Rik
ENSMUSG00000117810	117.354	-0.359363	0.211423	-1.69974	0.0891802	0.999982	Gm8934
ENSMUSG00000037214	261.205	-0.244605	0.143942	-1.69933	0.0892567	0.999982	Thap1
ENSMUSG00000020400	716.887	0.154252	0.0907859	1.69908	0.089305	0.999982	Tnip1
ENSMUSG00000038803	755.147	-0.165045	0.0971592	-1.6987	0.0893751	0.999982	Ost4
ENSMUSG00000038822	267.509	-0.244429	0.143894	-1.69868	0.0893799	0.999982	Hace1
ENSMUSG00000015437	418.659	0.618183	0.363928	1.69864	0.0893873	0.999982	Gzmb
ENSMUSG00000066306	2081.29	0.145712	0.0858044	1.69819	0.0894713	0.999982	Numa1
ENSMUSG00000022892	104.742	-0.362268	0.213368	-1.69786	0.0895349	0.999982	App
ENSMUSG00000039410	66.2094	-0.578032	0.340515	-1.69752	0.0895984	0.999982	Prdm16
ENSMUSG00000020870	2.48586	-2.69565	1.58822	-1.69727	0.0896454	0.999982	Cdc34b
ENSMUSG00000001948	4.42005	-1.80702	1.06473	-1.69717	0.0896651	0.999982	Spa17
ENSMUSG00000041084	1592.95	-0.127241	0.074989	-1.6968	0.0897349	0.999982	Ostc
ENSMUSG00000105452	2.5025	-2.68606	1.58355	-1.69623	0.0898429	0.999982	NA
ENSMUSG00000100150	128.866	-0.388479	0.229029	-1.6962	0.0898476	0.999982	Gm19585
ENSMUSG00000029119	328.618	0.224524	0.132452	1.69513	0.0900501	0.999982	Man2b2
ENSMUSG00000067608	188.458	-0.321908	0.189926	-1.69492	0.0900911	0.999982	NA
ENSMUSG00000058486	169.801	0.291593	0.172151	1.69383	0.0902985	0.999982	Wdr91
ENSMUSG00000023345	245.807	0.240255	0.141859	1.69361	0.0903389	0.999982	Poc1a
ENSMUSG00000022216	3188.33	-0.113297	0.0668988	-1.69356	0.090348	0.999982	Psme1
ENSMUSG00000107476	689.517	-0.216326	0.127743	-1.69345	0.09037	0.999982	Zfp862-ps
ENSMUSG00000009941	3.67936	2.14638	1.26772	1.69309	0.0904379	0.999982	Nxf2
ENSMUSG00002075075	28.6688	-0.694464	0.410207	-1.69296	0.0904629	0.999982	NA
ENSMUSG00000020262	570.293	-0.176265	0.104125	-1.69282	0.0904903	0.999982	Adarb1
ENSMUSG00000041362	82.6457	-0.533488	0.315272	-1.69215	0.0906169	0.999982	Shtn1
ENSMUSG00000094708	14.9699	-1.12068	0.662462	-1.69168	0.0907065	0.999982	Gm10359
ENSMUSG00000094936	20.8595	-0.795889	0.47054	-1.69144	0.0907535	0.999982	Rbm4
ENSMUSG00000054874	617.93	0.171847	0.101641	1.69073	0.0908892	0.999982	Pcnx3
ENSMUSG00000006740	2485.25	0.134373	0.0795135	1.68994	0.0910387	0.999982	Kif5b
ENSMUSG00000020253	338.603	-0.22166	0.131176	-1.68979	0.0910676	0.999982	Ppm1m
ENSMUSG00000098041	1.15849	3.65501	2.1631	1.68971	0.0910834	NA	NA
ENSMUSG00000119963	1.15849	3.65501	2.1631	1.68971	0.0910834	NA	NA
ENSMUSG00000085177	1.14919	-3.66054	2.16638	-1.68971	0.0910844	NA	NA
ENSMUSG00000110841	101.726	-0.519554	0.307617	-1.68896	0.0912266	0.999982	Gpx4-ps2
ENSMUSG00000050222	7.52571	-1.3183	0.780779	-1.68844	0.0913273	0.999982	Il17d
ENSMUSG00000115193	25.9735	-0.731396	0.433366	-1.68771	0.0914668	0.999982	Gm6533
ENSMUSG00000017404	2539.25	-0.113691	0.0673792	-1.68733	0.0915393	0.999982	Rpl19
ENSMUSG00000056888	943.581	0.176117	0.10438	1.68727	0.0915513	0.999982	Glipr1
ENSMUSG00000098006	12.4144	-1.07311	0.636175	-1.68682	0.0916388	0.999982	Gm8565
ENSMUSG00000026073	2.99951	2.28878	1.35693	1.68673	0.0916551	0.999982	Il1r2
ENSMUSG00000032215	771.511	-0.164635	0.0976135	-1.6866	0.0916804	0.999982	Rsl24d1
ENSMUSG00000061607	692.388	0.183449	0.108846	1.6854	0.0919107	0.999982	Mdc1
ENSMUSG00000020572	2497.42	-0.145139	0.0861687	-1.68436	0.0921118	0.999982	Nampt
ENSMUSG00000024034	3.9422	1.9357	1.14929	1.68426	0.0921316	0.999982	Tmprss3
ENSMUSG00000001156	190.117	0.27272	0.161949	1.68399	0.0921843	0.999982	Mxd1
ENSMUSG00000037972	214.9	-0.365571	0.217104	-1.68385	0.0922097	0.999982	Snn
ENSMUSG00000019738	263.801	-0.240824	0.143022	-1.68383	0.0922149	0.999982	Polr2i
ENSMUSG00000042772	1587.71	0.142738	0.0847738	1.68375	0.0922302	0.999982	Smg7
ENSMUSG00000022450	412.663	-0.239734	0.142409	-1.68342	0.0922936	0.999982	Ndufa6
ENSMUSG00000054942	313.558	0.214231	0.127269	1.68329	0.0923182	0.999982	Miga1
ENSMUSG00000055302	3645.58	-0.126203	0.0749999	-1.68271	0.0924316	0.999982	Mrfap1
ENSMUSG00000041346	222.687	-0.247906	0.147331	-1.68265	0.0924433	0.999982	Wrap53
ENSMUSG00000039585	213.858	0.265945	0.158097	1.68216	0.0925377	0.999982	Myo9a
ENSMUSG00000028433	3395.92	0.124106	0.0737949	1.68177	0.0926135	0.999982	Ubap2
ENSMUSG00000034105	121.556	0.345656	0.20567	1.68063	0.092834	0.999982	Meak7
ENSMUSG00000040010	3843.09	0.112011	0.0666711	1.68005	0.0929467	0.999982	Slc7a5
ENSMUSG00000046811	3.95234	1.90653	1.13503	1.67972	0.0930111	0.999982	Gltpd2
ENSMUSG00000035078	512.686	0.177071	0.105417	1.67972	0.0930116	0.999982	Mtmr9
ENSMUSG00000002489	709.63	-0.188674	0.112333	-1.6796	0.0930361	0.999982	Tiam1
ENSMUSG00000001558	1.14628	3.64216	2.16869	1.67943	0.0930683	NA	Klhl10
ENSMUSG00000022678	997.275	0.138056	0.0822296	1.67891	0.0931693	0.999982	Nde1
ENSMUSG00000018340	2218.06	0.165015	0.0983098	1.67853	0.0932445	0.999982	Anxa6
ENSMUSG00000078134	73.8342	-0.589424	0.35118	-1.67841	0.0932675	0.999982	Srsf3-ps
ENSMUSG00000036572	392.59	0.208379	0.124192	1.67788	0.0933705	0.999982	Upf3b
ENSMUSG00000115685	5463.38	-0.105604	0.0629539	-1.67748	0.0934485	0.999982	NA
ENSMUSG00000032712	394.886	0.204815	0.122129	1.67703	0.0935358	0.999982	Resf1
ENSMUSG00000036990	1744.26	0.140402	0.0838044	1.67535	0.0938654	0.999982	Otud4
ENSMUSG00000033039	314.431	0.216782	0.129427	1.67493	0.0939474	0.999982	Micall1
ENSMUSG00000006676	1789.61	0.124959	0.0746071	1.67489	0.093956	0.999982	Usp19
ENSMUSG00000006731	5789.32	0.104176	0.0622035	1.67475	0.0939828	0.999982	B4galnt1
ENSMUSG00000020163	538.515	-0.224469	0.134037	-1.67468	0.0939979	0.999982	Uqcr11
ENSMUSG00000083270	11.331	-1.07474	0.641794	-1.67458	0.0940164	0.999982	Gm13498
ENSMUSG00000020460	8030.3	-0.132105	0.0789071	-1.67418	0.0940955	0.999982	Rps27a
ENSMUSG00000031609	261.481	-0.238785	0.142654	-1.67388	0.0941542	0.999982	Sap30
ENSMUSG00000061462	1.13774	3.63324	2.17267	1.67225	0.094476	NA	Obscn
ENSMUSG00000029401	2867.26	-0.168782	0.100975	-1.67153	0.0946173	0.999982	Rilpl2
ENSMUSG00000087679	255.304	-0.264213	0.158118	-1.67099	0.0947243	0.999982	Tmem250-ps
ENSMUSG00000085241	140.772	-0.306101	0.18323	-1.67059	0.094803	0.999982	Snhg3
ENSMUSG00000050947	38.4042	-0.562891	0.336989	-1.67036	0.0948489	0.999982	Amigo1
ENSMUSG00000025260	803.016	-0.172671	0.103374	-1.67036	0.0948491	0.999982	Hsd17b10
ENSMUSG00000031595	4.78238	-1.6587	0.99308	-1.67025	0.0948689	0.999982	Pdgfrl
ENSMUSG00000029775	545.629	0.169852	0.101701	1.6701	0.0948995	0.999982	Klhdc10
ENSMUSG00000085853	401.524	0.218464	0.130886	1.66912	0.095093	0.999982	Gm12167
ENSMUSG00000112654	324.568	0.213724	0.128055	1.66901	0.0951157	0.999982	4930455C13Rik
ENSMUSG00000033352	698.266	0.16994	0.101876	1.66811	0.0952931	0.999982	Map2k4
ENSMUSG00000092116	8.79932	-1.21796	0.730485	-1.66734	0.0954478	0.999982	NA
ENSMUSG00000024194	402.744	-0.208808	0.125245	-1.6672	0.095475	0.999982	Cuta
ENSMUSG00000095668	52.7482	-0.486195	0.291686	-1.66684	0.0955457	0.999982	Trbd1
ENSMUSG00000117049	16.1785	-0.899092	0.539441	-1.66671	0.0955719	0.999982	NA
ENSMUSG00000090322	56.3788	0.469624	0.281793	1.66656	0.0956027	0.999982	NA
ENSMUSG00000027272	734.451	0.164843	0.0989226	1.66639	0.0956362	0.999982	Ubr1
ENSMUSG00000020629	553.03	0.171939	0.103192	1.66621	0.0956726	0.999982	Adi1
ENSMUSG00000054312	540.56	-0.174808	0.104918	-1.66614	0.0956849	0.999982	Mrps21
ENSMUSG00000031591	276.831	0.254356	0.152691	1.66582	0.0957493	0.999982	Asah1
ENSMUSG00000096917	176.537	-0.294808	0.177003	-1.66555	0.0958022	0.999982	2500002B13Rik
ENSMUSG00000039853	61.3523	0.457331	0.27467	1.66502	0.0959084	0.999982	Trim14
ENSMUSG00000041841	3319.48	-0.101116	0.0607361	-1.66485	0.0959433	0.999982	Rpl37
ENSMUSG00000041841	3319.48	-0.101116	0.0607361	-1.66485	0.0959433	0.999982	Rpl37rt
ENSMUSG00000079658	1135.74	-0.137123	0.0823845	-1.66443	0.0960267	0.999982	Eloc
ENSMUSG00000087819	2.97351	2.29191	1.37721	1.66417	0.096079	0.999982	Gm25117
ENSMUSG00000039114	2532.83	-0.687481	0.413123	-1.66411	0.0960908	0.999982	Nrn1
ENSMUSG00000120053	1.76757	-3.18574	1.91496	-1.6636	0.0961914	0.999982	NA
ENSMUSG00000000532	156.896	-0.294594	0.17712	-1.66324	0.0962638	0.999982	Acvr1b
ENSMUSG00000066357	1045.52	0.140728	0.0846111	1.66324	0.0962651	0.999982	Wdr6
ENSMUSG00000007379	55.6183	0.475049	0.285643	1.66309	0.0962952	0.999982	Dennd2c
ENSMUSG00000045679	130.904	0.33806	0.203304	1.66283	0.0963473	0.999982	Slc66a3
ENSMUSG00000023079	172.769	0.27543	0.16564	1.66283	0.0963474	0.999982	Gtf2ird1
ENSMUSG00000043953	11.2107	-1.07186	0.644677	-1.66263	0.0963857	0.999982	Ccrl2
ENSMUSG00000108282	116.604	0.328831	0.197808	1.66237	0.0964384	0.999982	NA
ENSMUSG00000041009	1.41905	-3.97004	2.38846	-1.66218	0.0964767	0.999982	Iqcf4
ENSMUSG00000053303	4.85507	-1.67264	1.00645	-1.66193	0.0965274	0.999982	Slc22a26
ENSMUSG00000024413	485.661	0.181755	0.109454	1.66056	0.0968018	0.999982	Npc1
ENSMUSG00000067577	421.554	-0.206634	0.124444	-1.66047	0.0968208	0.999982	A430093F15Rik
ENSMUSG00000039637	454.522	0.179418	0.108095	1.65982	0.0969514	0.999982	Coro7
ENSMUSG00000092371	332.375	0.204781	0.123444	1.6589	0.0971369	0.999982	NA
ENSMUSG00000031125	3.93773	1.94604	1.17351	1.65831	0.0972547	0.999982	3830403N18Rik
ENSMUSG00000040560	320.208	0.20994	0.126628	1.65793	0.0973322	0.999982	Wdr7
ENSMUSG00000025171	54.7817	-0.54141	0.326625	-1.65759	0.0974004	0.999982	Ubtd1
ENSMUSG00000074796	30.0949	0.761157	0.45943	1.65674	0.0975717	0.999982	Slc4a11
ENSMUSG00000018126	3.60301	-2.1351	1.28895	-1.65646	0.0976284	0.999982	Baiap2l2
ENSMUSG00000043421	110.538	-0.351799	0.21239	-1.65638	0.0976443	0.999982	Hilpda
ENSMUSG00000035357	21.1442	-0.899949	0.543437	-1.65603	0.0977153	0.999982	Pdzrn3
ENSMUSG00000019854	722.565	-0.166104	0.100335	-1.6555	0.0978232	0.999982	Reps1
ENSMUSG00000120244	45.4396	0.539838	0.32622	1.65483	0.0979594	0.999982	NA
ENSMUSG00000030417	679.908	-0.172576	0.104307	-1.6545	0.0980264	0.999982	Pdcd5
ENSMUSG00000022956	335.537	-0.2625	0.158671	-1.65437	0.0980523	0.999982	Atp5o
ENSMUSG00000091955	357.615	-0.261407	0.158051	-1.65394	0.09814	0.999982	Tmsb10b
ENSMUSG00000055319	1457.85	0.117482	0.0710335	1.6539	0.098148	0.999982	Sec23ip
ENSMUSG00000020677	819.433	0.151517	0.0916647	1.65295	0.0983415	0.999982	Ddx52
ENSMUSG00000049091	1281.96	-0.124729	0.07548	-1.65248	0.0984373	0.999982	Sephs2
ENSMUSG00000085741	630.344	-0.166874	0.101027	-1.65178	0.0985804	0.999982	5430405H02Rik
ENSMUSG00000106558	2.30583	-2.60033	1.57444	-1.65159	0.098618	0.999982	NA
ENSMUSG00000120154	10.8753	-1.1687	0.707857	-1.65103	0.0987317	0.999982	NA
ENSMUSG00000024727	8.72753	-1.45894	0.883714	-1.65092	0.0987543	0.999982	Trpm6
ENSMUSG00000104361	1.82533	3.21041	1.94514	1.65048	0.0988455	0.999982	NA
ENSMUSG00000044814	1.70939	-3.10822	1.88328	-1.65043	0.0988549	0.999982	Or55b3
ENSMUSG00000032393	1398.65	0.122805	0.0744531	1.64943	0.0990601	0.999982	Dpp8
ENSMUSG00000037818	57.3286	-0.464249	0.281559	-1.64885	0.0991775	0.999982	Abhd18
ENSMUSG00000111892	17.2127	-0.854551	0.518375	-1.64852	0.0992462	0.999982	NA
ENSMUSG00000112336	173.854	0.275824	0.16735	1.64818	0.0993155	0.999982	NA
ENSMUSG00000025366	3814.39	0.106724	0.0647595	1.64801	0.0993506	0.999982	Esyt1
ENSMUSG00000020431	2.32778	-2.58497	1.56901	-1.64752	0.0994521	0.999982	Adcy1
ENSMUSG00000001763	3.51293	2.09054	1.26941	1.64687	0.0995857	0.999982	Tspan33
ENSMUSG00000023026	1172.1	0.148086	0.0899397	1.64651	0.0996594	0.999982	Dip2b
ENSMUSG00000027282	1208.89	0.129888	0.0789003	1.64623	0.0997155	0.999982	Mtch2
ENSMUSG00000099474	9.9936	-1.12562	0.683798	-1.64613	0.0997362	0.999982	1700097N02Rik
ENSMUSG00000040383	2189.65	0.110857	0.0673481	1.64603	0.0997584	0.999982	Aqr
ENSMUSG00000008167	69.508	0.455962	0.277091	1.64553	0.0998601	0.999982	Fbxw9
ENSMUSG00000047675	14089.8	-0.108363	0.0658783	-1.6449	0.0999899	0.999982	Rps8
ENSMUSG00000047675	14089.8	-0.108363	0.0658783	-1.6449	0.0999899	0.999982	Gm15501
ENSMUSG00000028894	1073.65	-0.133523	0.081174	-1.64489	0.0999915	0.999982	Inpp5b
ENSMUSG00000002831	27.1666	-0.810827	0.493075	-1.64443	0.100087	0.999982	Plin4
ENSMUSG00000028716	48.6007	-0.549465	0.334296	-1.64365	0.100249	0.999982	Pdzk1ip1
ENSMUSG00000027111	626.61	0.165247	0.100544	1.64353	0.100274	0.999982	Itga6
ENSMUSG00000030314	437.01	0.198866	0.121061	1.6427	0.100446	0.999982	Atg7
ENSMUSG00000061787	8149.83	-0.135479	0.0824796	-1.64258	0.100471	0.999982	Rps17
ENSMUSG00000032009	1263.16	0.127386	0.0775552	1.64252	0.100483	0.999982	Sesn3
ENSMUSG00000009621	299.421	0.227507	0.138526	1.64235	0.100518	0.999982	Vav2
ENSMUSG00000010307	9.11164	-1.18815	0.723455	-1.64233	0.100521	0.999982	Tmem86a
ENSMUSG00000092257	9.00209	-1.2585	0.766298	-1.64231	0.100526	0.999982	Gm2308
ENSMUSG00000028953	2264.28	0.124782	0.0760512	1.64076	0.100848	0.999982	Abcf2
ENSMUSG00000096656	21.056	0.784688	0.478278	1.64065	0.10087	0.999982	Trav12-2
ENSMUSG00000074794	89.3087	0.403457	0.245985	1.64017	0.100971	0.999982	Arrdc3
ENSMUSG00000024778	154.629	0.295704	0.180346	1.63965	0.101078	0.999982	Fas
ENSMUSG00000040943	382.392	0.248424	0.1516	1.63868	0.10128	0.999982	Tet2
ENSMUSG00000073542	376.445	0.19507	0.119069	1.6383	0.101359	0.999982	Cep76
ENSMUSG00000027166	167.435	-0.273234	0.166802	-1.63808	0.101406	0.999982	Dnajc24
ENSMUSG00000081572	3.79683	1.84255	1.12485	1.63804	0.101413	0.999982	Gm14138
ENSMUSG00000034789	222.967	-0.240248	0.146776	-1.63683	0.101666	0.999982	Rab24
ENSMUSG00000037070	1686.1	-0.111812	0.0683284	-1.63639	0.101759	0.999982	Rbmxl1
ENSMUSG00000008855	301.271	0.223924	0.136881	1.6359	0.10186	0.999982	Hdac5
ENSMUSG00000022034	388.493	0.201474	0.123161	1.63586	0.10187	0.999982	Esco2
ENSMUSG00000011884	1573	0.133722	0.0817512	1.63571	0.101899	0.999982	Gltp
ENSMUSG00000107696	12.3306	-0.993567	0.607705	-1.63495	0.10206	0.999982	NA
ENSMUSG00000038679	179.572	0.29732	0.181859	1.63489	0.102071	0.999982	Trps1
ENSMUSG00000073430	12.6627	1.00608	0.615478	1.63464	0.102125	0.999982	Gm10505
ENSMUSG00000031078	136.104	0.328916	0.20127	1.6342	0.102217	0.999982	Cttn
ENSMUSG00000043903	3.81386	-1.85067	1.13259	-1.63402	0.102255	0.999982	Zfp469
ENSMUSG00000019977	1282.6	0.133039	0.0814338	1.6337	0.102322	0.999982	Hbs1l
ENSMUSG00000030536	4316.44	0.112432	0.0688522	1.63294	0.102482	0.999982	Iqgap1
ENSMUSG00000090952	329.015	-0.202005	0.123764	-1.63217	0.102643	0.999982	NA
ENSMUSG00000028977	37.5825	0.574733	0.352135	1.63214	0.10265	0.999982	Casz1
ENSMUSG00000072572	3.50274	2.04699	1.25428	1.63201	0.102678	0.999982	Slc39a2
ENSMUSG00000121097	1.64424	3.04639	1.86707	1.63164	0.102755	0.999982	NA
ENSMUSG00000076921	1.64951	3.04319	1.86527	1.6315	0.102785	0.999982	Traj7
ENSMUSG00000038608	1646	0.177804	0.108992	1.63134	0.102818	0.999982	Dock10
ENSMUSG00000084353	23.6955	-0.75222	0.46119	-1.63104	0.102881	0.999982	NA
ENSMUSG00000022898	420.256	0.184488	0.113115	1.63097	0.102896	0.999982	Vps26c
ENSMUSG00000026576	140.765	-0.308806	0.189365	-1.63075	0.102944	0.999982	Atp1b1
ENSMUSG00000021662	1.66065	-3.0802	1.88885	-1.63073	0.102948	0.999982	Arhgef28
ENSMUSG00000055917	259.512	-0.229779	0.140907	-1.63071	0.102951	0.999982	Zfp277
ENSMUSG00000036430	178.655	-0.269088	0.165016	-1.63068	0.102958	0.999982	Tbcc
ENSMUSG00000037470	2327.81	0.109704	0.0672876	1.63037	0.103023	0.999982	Uggt1
ENSMUSG00000024052	198.691	0.279416	0.171396	1.63023	0.103053	0.999982	Lpin2
ENSMUSG00000010142	205.407	0.25629	0.157226	1.63008	0.103085	0.999982	Tnfrsf13b
ENSMUSG00000041870	1966.9	0.115205	0.07068	1.62995	0.103113	0.999982	Ankrd13a
ENSMUSG00000028514	2238.53	0.132716	0.08144	1.62961	0.103183	0.999982	Usp24
ENSMUSG00000029616	1616.19	-0.112383	0.0689667	-1.62952	0.103203	0.999982	Erp29
ENSMUSG00000071226	1.63531	3.04638	1.86951	1.62951	0.103206	0.999982	Cecr2
ENSMUSG00000048174	55.7929	0.472606	0.290139	1.6289	0.103335	0.999982	Tmem81
ENSMUSG00000024085	1223.21	0.133338	0.0819018	1.62802	0.10352	0.999982	Man2a1
ENSMUSG00000032741	417.812	0.190455	0.117007	1.62773	0.103582	0.999982	Tpcn1
ENSMUSG00000061665	1087.14	0.139112	0.0854696	1.62761	0.103607	0.999982	Cd2ap
ENSMUSG00000079505	829.206	-0.175792	0.108021	-1.62738	0.103656	0.999982	NA
ENSMUSG00000054280	670.901	0.179714	0.110457	1.62701	0.103735	0.999982	Prr14l
ENSMUSG00000112926	7.30107	-1.408	0.865439	-1.62692	0.103754	0.999982	NA
ENSMUSG00000020297	244.095	-0.248291	0.152632	-1.62673	0.103795	0.999982	Nsg2
ENSMUSG00000045007	6.63303	1.38782	0.853216	1.62657	0.103828	0.999982	Tubg2
ENSMUSG00000038827	471.31	0.176057	0.108274	1.62603	0.103942	0.999982	Abitram
ENSMUSG00000005804	325.101	0.211347	0.129983	1.62596	0.103958	0.999982	Bloc1s6
ENSMUSG00000024130	567.709	0.185657	0.114231	1.62528	0.104103	0.999982	Abca3
ENSMUSG00000120080	2.31963	2.57504	1.58447	1.62517	0.104126	0.999982	NA
ENSMUSG00000031402	563.856	0.173324	0.106695	1.62448	0.104274	0.999982	Mpp1
ENSMUSG00000025885	2.81204	-2.22791	1.37147	-1.62447	0.104276	0.999982	Myo5b
ENSMUSG00000118544	1.19425	-3.70796	2.28466	-1.62298	0.104594	NA	NA
ENSMUSG00000105161	14.655	-0.899971	0.554532	-1.62294	0.104602	0.999982	NA
ENSMUSG00000074826	790.505	-0.170904	0.105343	-1.62237	0.104724	0.999982	Gm10767
ENSMUSG00000084968	152.259	0.302475	0.186446	1.62232	0.104734	0.999982	NA
ENSMUSG00000100280	333.951	-0.245365	0.15127	-1.62204	0.104795	0.999982	NA
ENSMUSG00000031608	781.861	0.142663	0.0879751	1.62163	0.104882	0.999982	Galnt7
ENSMUSG00000020340	4836.32	0.103746	0.0639894	1.6213	0.104954	0.999982	Cyfip2
ENSMUSG00000031578	1632.6	0.119233	0.0735464	1.62119	0.104976	0.999982	Mak16
ENSMUSG00000025185	2.2985	2.56294	1.58172	1.62035	0.105157	0.999982	Loxl4
ENSMUSG00000041879	1637.67	0.115735	0.0714517	1.61976	0.105284	0.999982	Ipo9
ENSMUSG00000068966	149.424	0.294597	0.181921	1.61937	0.105368	0.999982	Zbtb34
ENSMUSG00000019849	2057.84	0.111194	0.068675	1.61913	0.105419	0.999982	Prep
ENSMUSG00000027340	532.174	0.187567	0.115918	1.6181	0.10564	0.999982	Slc23a2
ENSMUSG00000024600	4.29245	-1.72667	1.06766	-1.61726	0.105823	0.999982	Slc27a6
ENSMUSG00000033020	1083.12	-0.169445	0.104785	-1.61707	0.105862	0.999982	Polr2f
ENSMUSG00000023953	867.815	0.144542	0.089393	1.61693	0.105893	0.999982	Polh
ENSMUSG00000089961	34.3209	-0.605895	0.374732	-1.61687	0.105905	0.999982	NA
ENSMUSG00000086682	82.8325	-0.387352	0.239591	-1.61672	0.105938	0.999982	Gm16023
ENSMUSG00000040761	1400.96	0.154981	0.095897	1.61612	0.106069	0.999982	Spen
ENSMUSG00000049792	606.428	0.162735	0.100725	1.61563	0.106175	0.999982	Bag5
ENSMUSG00000044199	380.842	0.19507	0.120826	1.61447	0.106425	0.999982	S1pr4
ENSMUSG00000057963	191.677	0.270732	0.167704	1.61434	0.106453	0.999982	Itpk1
ENSMUSG00000093726	28.1426	-0.692096	0.429033	-1.61315	0.106711	0.999982	NA
ENSMUSG00000031197	1589.51	0.120022	0.0744088	1.61301	0.106743	0.999982	Vbp1
ENSMUSG00000024074	498.702	0.186011	0.115336	1.61278	0.106792	0.999982	Crim1
ENSMUSG00000085189	1.6735	3.07624	1.90754	1.61267	0.106816	0.999982	NA
ENSMUSG00000000823	271.698	0.258595	0.160352	1.61267	0.106817	0.999982	Zfp512b
ENSMUSG00000074220	75.3468	0.416718	0.258505	1.61203	0.106956	0.999982	Zfp382
ENSMUSG00000104496	66.568	-0.446967	0.277372	-1.61143	0.107085	0.999982	Gm5837
ENSMUSG00000037225	373.8	-0.186677	0.115849	-1.61138	0.107097	0.999982	Fgf2
ENSMUSG00000045854	91.2602	-0.376287	0.233532	-1.61129	0.107117	0.999982	Lyrm2
ENSMUSG00000022890	1895.75	-0.13724	0.0851803	-1.61117	0.107142	0.999982	Atp5j
ENSMUSG00000070697	1267.45	-0.131402	0.081572	-1.61087	0.107209	0.999982	Utp3
ENSMUSG00000022657	177.32	0.278656	0.172989	1.61083	0.107217	0.999982	Cd96
ENSMUSG00000035513	27.3682	0.656685	0.407765	1.61045	0.1073	0.999982	Ntng2
ENSMUSG00000097233	9.0538	1.23144	0.764714	1.61033	0.107326	0.999982	NA
ENSMUSG00000064302	1567.45	0.124228	0.0771941	1.6093	0.107551	0.999982	Clasp1
ENSMUSG00000028995	343.24	0.211884	0.131699	1.60885	0.107649	0.999982	Hycc1
ENSMUSG00000051133	15.8282	-0.871985	0.542229	-1.60815	0.107803	0.999982	NA
ENSMUSG00000106464	74.3388	0.412476	0.256541	1.60784	0.107871	0.999982	C130083M11Rik
ENSMUSG00000022037	109.632	-0.433921	0.269982	-1.60722	0.108005	0.999982	Clu
ENSMUSG00000026571	124.938	0.335018	0.208483	1.60693	0.108069	0.999982	Dcaf6
ENSMUSG00000089902	80.6375	-0.401225	0.249821	-1.60605	0.108262	0.999982	NA
ENSMUSG00000040435	182.969	-0.261034	0.162573	-1.60564	0.108353	0.999982	Ppp1r15a
ENSMUSG00000053754	1726.56	0.125342	0.0780748	1.60541	0.108404	0.999982	Chd8
ENSMUSG00000097993	23.7049	-0.693565	0.432053	-1.60528	0.108432	0.999982	Ptprv
ENSMUSG00000028431	1412.77	0.116856	0.0728166	1.6048	0.108537	0.999982	Elp1
ENSMUSG00000023845	1560.92	0.138883	0.0865432	1.60479	0.10854	0.999982	Lnpep
ENSMUSG00000058812	583.501	0.163639	0.101998	1.60434	0.10864	0.999982	0610039K10Rik
ENSMUSG00000081809	1.17963	3.67752	2.29326	1.60362	0.108798	NA	Gm15539
ENSMUSG00000081076	29.4245	-0.634101	0.39549	-1.60333	0.108862	0.999982	Rpsa-ps4
ENSMUSG00000055204	2760.97	0.117154	0.0730703	1.6033	0.108867	0.999982	Ankrd17
ENSMUSG00000029185	16.9084	-0.821268	0.51225	-1.60326	0.108878	0.999982	Fam114a1
ENSMUSG00000035953	1652.36	-0.111364	0.0695282	-1.60171	0.10922	0.999982	Pip4p1
ENSMUSG00000056399	6.69282	1.38933	0.867467	1.60159	0.109246	0.999982	Prss34
ENSMUSG00000091475	4.66977	-1.60814	1.00444	-1.60103	0.109371	0.999982	Cerox1
ENSMUSG00002076329	4.4824	1.76915	1.10502	1.60101	0.109374	0.999982	NA
ENSMUSG00000111904	4.50837	1.78738	1.11659	1.60075	0.109432	0.999982	NA
ENSMUSG00000047514	952.266	-0.162935	0.101801	-1.60052	0.109483	0.999982	Tspyl1
ENSMUSG00000078921	671.484	-0.204001	0.12747	-1.60038	0.109515	0.999982	Tgtp2
ENSMUSG00000024999	937.433	0.146676	0.0916977	1.59956	0.109697	0.999982	Noc3l
ENSMUSG00000085111	486.483	0.176011	0.110059	1.59924	0.109766	0.999982	Ascl4
ENSMUSG00000094441	169.725	0.27351	0.171055	1.59896	0.109829	0.999982	Zfp955a
ENSMUSG00000033282	76.8558	0.414552	0.259265	1.59895	0.109831	0.999982	Rpgrip1l
ENSMUSG00000018844	29.0366	-0.685265	0.428624	-1.59876	0.109875	0.999982	Fndc8
ENSMUSG00000084880	915.72	-0.138879	0.0868765	-1.59858	0.109914	0.999982	Tomm6os
ENSMUSG00000021057	2.28837	2.59936	1.62608	1.59854	0.109922	0.999982	Akap5
ENSMUSG00000094017	17.7453	-0.807876	0.505435	-1.59838	0.109959	0.999982	NA
ENSMUSG00000021027	656.448	0.177664	0.111168	1.59815	0.110009	0.999982	Ralgapa1
ENSMUSG00000067215	1.17109	3.66853	2.29775	1.59657	0.110361	NA	Usp51
ENSMUSG00000037306	25.3318	-0.68042	0.426291	-1.59614	0.110458	0.999982	Man1c1
ENSMUSG00000032609	162.652	-0.294504	0.184545	-1.59584	0.110525	0.999982	Klhdc8b
ENSMUSG00000026655	3030.26	0.125952	0.0789357	1.59562	0.110573	0.999982	Fam107b
ENSMUSG00000000766	176.688	-0.262123	0.164346	-1.59495	0.110724	0.999982	Oprm1
ENSMUSG00000005103	4238.58	0.103091	0.064651	1.59458	0.110805	0.999982	Wdr1
ENSMUSG00000037710	552.158	-0.158606	0.0994983	-1.59406	0.110923	0.999982	Cisd1
ENSMUSG00000108608	15.3764	-0.971425	0.60999	-1.59253	0.111267	0.999982	NA
ENSMUSG00000074646	110.316	0.341483	0.214438	1.59246	0.111282	0.999982	6430550D23Rik
ENSMUSG00000067071	146.394	-0.306936	0.19275	-1.59241	0.111294	0.999982	Hes6
ENSMUSG00000024926	423.713	-0.182913	0.114877	-1.59226	0.111326	0.999982	Kat5
ENSMUSG00000007617	450.171	0.180276	0.113238	1.59202	0.111381	0.999982	Homer1
ENSMUSG00000071392	2.30136	2.6074	1.63797	1.59185	0.111419	0.999982	Ect2l
ENSMUSG00000054823	1505.04	0.12768	0.0802139	1.59174	0.111443	0.999982	Nsd3
ENSMUSG00000097558	12.5233	-1.01768	0.639367	-1.5917	0.111452	0.999982	NA
ENSMUSG00000051864	347.958	0.194667	0.122306	1.59163	0.111468	0.999982	Tbc1d22a
ENSMUSG00000103178	86.5856	0.365896	0.229962	1.59111	0.111584	0.999982	NA
ENSMUSG00000078154	113.218	-0.438603	0.275664	-1.59108	0.111592	0.999982	Gm12184
ENSMUSG00000078672	5.10243	2.00478	1.26023	1.59081	0.111653	0.999982	Mup20
ENSMUSG00000030822	358.877	0.194009	0.121958	1.59078	0.111658	0.999982	Prr14
ENSMUSG00000020576	629.216	0.169027	0.106276	1.59045	0.111733	0.999982	Nbas
ENSMUSG00000026032	484.392	-0.178606	0.112302	-1.59042	0.111741	0.999982	Ndufb3
ENSMUSG00000080885	54.4281	-0.588124	0.369794	-1.59041	0.111742	0.999982	Rpl10-ps6
ENSMUSG00000041375	665.566	-0.15507	0.0975204	-1.59012	0.111807	0.999982	Ccdc9
ENSMUSG00000035640	255.064	0.232006	0.145917	1.58999	0.111838	0.999982	Cbarp
ENSMUSG00000120193	1.62736	-3.04403	1.91461	-1.5899	0.111858	0.999982	Gm36457
ENSMUSG00000023832	569.117	-0.167134	0.10513	-1.58978	0.111884	0.999982	Acat2
ENSMUSG00000052673	1716.71	-0.164977	0.103788	-1.58955	0.111936	0.999982	NA
ENSMUSG00000090054	1123.48	0.16728	0.105285	1.58883	0.1121	0.999982	NA
ENSMUSG00000027952	509.948	-0.185203	0.116591	-1.58849	0.112175	0.999982	Pmvk
ENSMUSG00000056999	2174.71	0.106673	0.0671653	1.58822	0.112236	0.999982	Ide
ENSMUSG00000024965	2420.07	0.106328	0.0670039	1.5869	0.112536	0.999982	Fermt3
ENSMUSG00000053641	402.787	0.196573	0.1239	1.58655	0.112615	0.999982	Dennd4a
ENSMUSG00000032402	418.373	0.260091	0.163973	1.58618	0.112698	0.999982	Smad3
ENSMUSG00000121596	23.1061	0.722615	0.455678	1.5858	0.112784	0.999982	NA
ENSMUSG00000016520	658.098	0.160878	0.101462	1.58561	0.112829	0.999982	Lnx2
ENSMUSG00000028986	123.474	0.315182	0.198883	1.58476	0.11302	0.999982	Klhl7
ENSMUSG00000038398	482.272	0.176017	0.111079	1.58461	0.113054	0.999982	Upf3a
ENSMUSG00000005483	1183.24	-0.120985	0.076386	-1.58387	0.113224	0.999982	Dnajb1
ENSMUSG00000009927	8576.46	-0.10976	0.0693149	-1.5835	0.113308	0.999982	Rps25
ENSMUSG00000086839	317.961	-0.23523	0.148562	-1.58338	0.113335	0.999982	NA
ENSMUSG00000022339	299.417	-0.205952	0.130098	-1.58305	0.113409	0.999982	Ebag9
ENSMUSG00000090120	1.19669	3.69571	2.33469	1.58296	0.113431	NA	NA
ENSMUSG00000043300	4.29641	1.71202	1.08184	1.5825	0.113535	0.999982	B3galnt1
ENSMUSG00000016427	418.94	-0.273371	0.172862	-1.58144	0.113778	0.999982	Ndufa1
ENSMUSG00000016344	438.117	-0.184527	0.116758	-1.58043	0.114009	0.999982	Ppdpf
ENSMUSG00000049354	3183.93	0.113166	0.0716101	1.58031	0.114037	0.999982	Dcaf7
ENSMUSG00000076924	1.16256	3.65951	2.31576	1.58026	0.114047	NA	Traj4
ENSMUSG00000081740	45.1717	-0.652228	0.412904	-1.57961	0.114195	0.999982	NA
ENSMUSG00000017418	842.01	0.167569	0.106127	1.57894	0.11435	0.999982	Arl5b
ENSMUSG00000036188	313.342	0.203321	0.128828	1.57823	0.114512	0.999982	Ankmy2
ENSMUSG00000074218	3.3097	-2.02074	1.28056	-1.57802	0.114562	0.999982	Cox7a1
ENSMUSG00000048720	44.3593	-0.567942	0.360384	-1.57593	0.115041	0.999982	Tbc1d12
ENSMUSG00000120748	37.7821	-0.542632	0.344343	-1.57585	0.115061	0.999982	NA
ENSMUSG00000045009	1.14836	-3.65944	2.32251	-1.57564	0.115109	NA	Prrt3
ENSMUSG00000021794	2968.12	0.101013	0.0641229	1.5753	0.115187	0.999982	Glud1
ENSMUSG00000001998	365.819	0.189041	0.120081	1.57428	0.115423	0.999982	Ap4e1
ENSMUSG00000079426	2945.34	0.103567	0.065797	1.57404	0.115478	0.999982	Arpc4
ENSMUSG00000043192	51.2117	-0.522432	0.332017	-1.57351	0.115601	0.999982	Gpi-ps
ENSMUSG00000022543	2.31762	-2.5582	1.62594	-1.57337	0.115634	0.999982	Dnaaf8
ENSMUSG00000035152	2626.43	0.108679	0.0690765	1.57331	0.115647	0.999982	Ap2b1
ENSMUSG00000060730	23.7606	-0.946276	0.601473	-1.57326	0.115658	0.999982	NA
ENSMUSG00000055172	17.9199	-0.77841	0.494935	-1.57275	0.115776	0.999982	C1ra
ENSMUSG00000033618	15.213	-0.897611	0.570847	-1.57242	0.115853	0.999982	Map3k13
ENSMUSG00000048490	1137.66	0.140951	0.0896472	1.57228	0.115885	0.999982	Nrip1
ENSMUSG00000013419	3.27774	1.97392	1.25557	1.57213	0.11592	0.999982	Zfp651
ENSMUSG00000026219	5050.01	0.0974442	0.0620031	1.5716	0.116043	0.999982	Trip12
ENSMUSG00000040952	7085.74	-0.113647	0.0723366	-1.57108	0.116164	0.999982	Rps19
ENSMUSG00000018821	30.6266	-0.624661	0.398195	-1.56873	0.116711	0.999982	Avpi1
ENSMUSG00000054509	356.049	0.198771	0.126762	1.56806	0.116867	0.999982	Parp4
ENSMUSG00000032479	2207.91	0.107408	0.0685293	1.56732	0.117039	0.999982	Map4
ENSMUSG00000024789	3170.46	-0.149449	0.095356	-1.56728	0.11705	0.999982	Jak2
ENSMUSG00000024571	1224.06	0.119016	0.0759415	1.5672	0.117068	0.999982	Txnl4a
ENSMUSG00000024571	1224.06	0.119016	0.0759415	1.5672	0.117068	0.999982	Naa12
ENSMUSG00000043090	198.315	0.252366	0.161042	1.56708	0.117096	0.999982	Zfp866
ENSMUSG00000030706	704.422	-0.141998	0.0906971	-1.56563	0.117435	0.999982	Mrpl48
ENSMUSG00000030276	16.2514	0.967463	0.618199	1.56497	0.11759	0.999982	Ttll3
ENSMUSG00000047126	4945.56	0.104348	0.0666823	1.56485	0.117618	0.999982	Cltc
ENSMUSG00000025369	1439.66	0.11474	0.0733249	1.56482	0.117625	0.999982	Smarcc2
ENSMUSG00000064372	178.072	-0.277951	0.177653	-1.56457	0.117684	0.999982	NA
ENSMUSG00000044147	4037.41	-0.136997	0.0875904	-1.56407	0.117801	0.999982	Arf6
ENSMUSG00000087405	7.63209	-1.20722	0.771877	-1.56401	0.117815	0.999982	NA
ENSMUSG00000027782	2833.42	0.103495	0.0661861	1.5637	0.117889	0.999982	Kpna4
ENSMUSG00000040260	4.82181	-1.65006	1.0557	-1.56301	0.11805	0.999982	Daam2
ENSMUSG00000038736	1327.41	-0.118266	0.0756735	-1.56284	0.118089	0.999982	Nudcd1
ENSMUSG00000027018	2693.13	-0.106914	0.068416	-1.5627	0.118124	0.999982	Hat1
ENSMUSG00000069729	1119	0.140336	0.0898062	1.56265	0.118135	0.999982	Arid1b
ENSMUSG00000073656	4.1457	-1.68615	1.07928	-1.56229	0.11822	0.999982	NA
ENSMUSG00000058427	1.7493	-3.1704	2.03002	-1.56176	0.118346	0.999982	Cxcl2
ENSMUSG00000035356	333.802	-0.247005	0.158401	-1.55937	0.118909	0.999982	Nfkbiz
ENSMUSG00000006005	4458.83	0.147694	0.0947151	1.55935	0.118913	0.999982	Tpr
ENSMUSG00000001105	256.015	-0.226195	0.145068	-1.55923	0.118941	0.999982	Ift20
ENSMUSG00000028522	1257.72	0.118031	0.0757164	1.55885	0.119032	0.999982	Mier1
ENSMUSG00000001029	288.468	0.208785	0.133991	1.5582	0.119185	0.999982	Icam2
ENSMUSG00000032875	36.0589	-0.565523	0.363017	-1.55784	0.119271	0.999982	Arhgef17
ENSMUSG00002076948	45.4612	0.495418	0.318061	1.55762	0.119323	0.999982	NA
ENSMUSG00000103313	8.07622	1.15996	0.744719	1.55758	0.119332	0.999982	NA
ENSMUSG00000035202	2164.3	0.463243	0.297499	1.55713	0.119441	0.999982	Lars2
ENSMUSG00000058317	47.7085	-0.491521	0.315714	-1.55685	0.119505	0.999982	Ube2e2
ENSMUSG00000109894	3.69922	-1.80343	1.15884	-1.55625	0.11965	0.999982	Gm5904
ENSMUSG00000089809	149.946	-0.303095	0.194803	-1.5559	0.119731	0.999982	A930011G23Rik
ENSMUSG00000089809	149.946	-0.303095	0.194803	-1.5559	0.119731	0.999982	Rasgef1b
ENSMUSG00000087132	21.5868	0.770501	0.495299	1.55563	0.119797	0.999982	A930001C03Rik
ENSMUSG00000038560	3.65819	-1.79261	1.15288	-1.55489	0.119972	0.999982	Sp6
ENSMUSG00000081302	2.85305	-2.25623	1.45117	-1.55477	0.120001	0.999982	Gm12020
ENSMUSG00000078570	492.77	-0.163452	0.105148	-1.55449	0.120068	0.999982	1110065P20Rik
ENSMUSG00000092625	7.02587	1.29575	0.833707	1.55421	0.120135	0.999982	NA
ENSMUSG00000057497	911.354	-0.130852	0.0842006	-1.55405	0.120173	0.999982	Fam136a
ENSMUSG00000057497	911.354	-0.130852	0.0842006	-1.55405	0.120173	0.999982	Gm30502
ENSMUSG00000019820	699.174	0.182771	0.117619	1.55393	0.120202	0.999982	Utrn
ENSMUSG00000002107	3092.84	0.0954066	0.0614057	1.55371	0.120253	0.999982	Celf2
ENSMUSG00000111229	22.6476	-0.710091	0.457096	-1.55349	0.120307	0.999982	NA
ENSMUSG00000030722	273.727	-0.212674	0.136917	-1.5533	0.120351	0.999982	Nfatc2ip
ENSMUSG00000019942	1548.94	-0.114814	0.0739427	-1.55274	0.120485	0.999982	Cdk1
ENSMUSG00000018412	835.447	0.146307	0.0942672	1.55204	0.120652	0.999982	Kansl1
ENSMUSG00000024165	1165.91	0.122644	0.0790223	1.55201	0.120659	0.999982	Jpt2
ENSMUSG00000107331	9.50575	-1.16865	0.753233	-1.55151	0.120778	0.999982	NA
ENSMUSG00000024327	25.2605	-0.673411	0.434111	-1.55124	0.120844	0.999982	Slc39a7
ENSMUSG00000024030	157.516	0.302942	0.1953	1.55116	0.120863	0.999982	Abcg1
ENSMUSG00000091780	58.1858	-0.455923	0.293969	-1.55092	0.12092	0.999982	Sco2
ENSMUSG00000020018	1321.47	-0.127827	0.0824784	-1.54983	0.121183	0.999982	Snrpf
ENSMUSG00000084384	13.5117	-0.991523	0.639877	-1.54955	0.121249	0.999982	Gm12251
ENSMUSG00000053081	28.6458	-0.657304	0.424211	-1.54947	0.121268	0.999982	NA
ENSMUSG00000110058	19.1682	-0.759544	0.490297	-1.54915	0.121345	0.999982	Gm5907
ENSMUSG00000036686	259.661	-0.222125	0.143433	-1.54863	0.121472	0.999982	Cc2d1a
ENSMUSG00000097523	26.5753	-0.656511	0.423941	-1.54859	0.12148	0.999982	1700022N22Rik
ENSMUSG00000032740	100.921	0.340903	0.220167	1.54838	0.12153	0.999982	Ccdc88a
ENSMUSG00000024935	2.69943	-2.14829	1.38785	-1.54793	0.121639	0.999982	Slc1a1
ENSMUSG00000086575	6.00428	-1.39786	0.903247	-1.54759	0.121721	0.999982	NA
ENSMUSG00000081631	4.21922	-1.70274	1.10029	-1.54754	0.121733	0.999982	NA
ENSMUSG00000075225	4.29716	1.71186	1.10664	1.54689	0.121889	0.999982	Ccdc162
ENSMUSG00000063412	59.4746	-0.483456	0.312692	-1.54611	0.122078	0.999982	Gm10131
ENSMUSG00000036781	1677.3	-0.156136	0.101007	-1.5458	0.122154	0.999982	Rps27l
ENSMUSG00000057329	878.674	-0.148873	0.0963379	-1.54532	0.122269	0.999982	Bcl2
ENSMUSG00000004568	252.487	0.220923	0.142964	1.54531	0.122271	0.999982	Arhgef18
ENSMUSG00000086174	3.17761	-1.91796	1.24164	-1.54469	0.12242	0.999982	NA
ENSMUSG00000078719	111.563	0.329276	0.213185	1.54456	0.122454	0.999982	Msmp
ENSMUSG00000053175	160.904	0.287138	0.185932	1.54432	0.122511	0.999982	Bcl3
ENSMUSG00000105655	2.32045	2.53169	1.63939	1.54429	0.122518	0.999982	NA
ENSMUSG00000100078	67.6093	-0.412824	0.267363	-1.54406	0.122574	0.999982	NA
ENSMUSG00000040472	232.32	-0.226447	0.146714	-1.54346	0.122719	0.999982	Rabggta
ENSMUSG00000051639	298.328	-0.289422	0.187542	-1.54324	0.122773	0.999982	Fbl-ps2
ENSMUSG00000029838	22.4101	0.704189	0.456401	1.54292	0.122851	0.999982	Ptn
ENSMUSG00000106917	10.5306	-1.0213	0.662174	-1.54235	0.12299	0.999982	NA
ENSMUSG00000027574	1.00045	-3.4569	2.24151	-1.54222	0.123019	NA	Nkain4
ENSMUSG00000059482	83.5315	0.360977	0.234224	1.54117	0.123276	0.999982	Cfap418
ENSMUSG00000034659	1439.58	0.137238	0.0891026	1.54022	0.123506	0.999982	Tmem109
ENSMUSG00000076437	1204.28	-0.133121	0.0865125	-1.53875	0.123864	0.999982	Selenoh
ENSMUSG00000024696	198.36	0.266682	0.173411	1.53786	0.124084	0.999982	Lpxn
ENSMUSG00000007880	2875.04	0.128185	0.0833721	1.5375	0.12417	0.999982	Arid1a
ENSMUSG00000025868	307.316	-0.205422	0.133621	-1.53735	0.124207	0.999982	Higd2a
ENSMUSG00000004631	2.16969	-2.46403	1.6028	-1.53733	0.124213	0.999982	Sgce
ENSMUSG00000074582	751.88	0.143212	0.0931581	1.5373	0.12422	0.999982	Arfgef2
ENSMUSG00000026197	119.474	-0.300843	0.195742	-1.53694	0.124309	0.999982	Zfand2b
ENSMUSG00000021139	1.00979	-3.46795	2.25655	-1.53684	0.124333	NA	Gm20498
ENSMUSG00000002007	1.00938	-3.46767	2.2568	-1.53654	0.124406	NA	Srpk3
ENSMUSG00000038331	1.00938	-3.46767	2.2568	-1.53654	0.124406	NA	Satb2
ENSMUSG00000113431	20.943	-0.753207	0.490409	-1.53588	0.124569	0.999982	NA
ENSMUSG00000113424	2.14626	2.4657	1.60572	1.53557	0.124645	0.999982	NA
ENSMUSG00000028873	1510.53	-0.109417	0.0712561	-1.53555	0.124649	0.999982	Cdca8
ENSMUSG00000084215	23.2481	-0.7147	0.465454	-1.53549	0.124664	0.999982	NA
ENSMUSG00000021068	930.901	0.145818	0.0949667	1.53546	0.12467	0.999982	Nin
ENSMUSG00000097925	1.69018	3.09047	2.0143	1.53427	0.124964	0.999982	NA
ENSMUSG00000021375	127.601	-0.305256	0.199007	-1.53389	0.125056	0.999982	Kif13a
ENSMUSG00000037108	108.224	-0.320007	0.208712	-1.53325	0.125215	0.999982	Zcwpw1
ENSMUSG00000031400	1339.61	0.11401	0.0743676	1.53306	0.125261	0.999982	G6pdx
ENSMUSG00000050052	134.868	-0.304831	0.198842	-1.53303	0.125268	0.999982	Tdrp
ENSMUSG00000059436	2878.35	-0.0941032	0.0613913	-1.53284	0.125314	0.999982	Max
ENSMUSG00000018923	434.178	-0.171705	0.112088	-1.53188	0.125552	0.999982	Med11
ENSMUSG00000024220	61.5121	0.456455	0.298012	1.53167	0.125605	0.999982	Zfp523
ENSMUSG00000042331	35.2004	-0.613951	0.400873	-1.53153	0.125638	0.999982	Specc1
ENSMUSG00000003352	40.2102	0.553788	0.361766	1.53079	0.125821	0.999982	Cacnb3
ENSMUSG00000047603	40.8632	0.534716	0.34932	1.53073	0.125835	0.999982	Zfp235
ENSMUSG00000119232	4.06495	-1.91965	1.25425	-1.53052	0.125887	0.999982	Mir692-2
ENSMUSG00000058838	78.1102	-0.517029	0.337935	-1.52997	0.126025	0.999982	Rps27a-ps2
ENSMUSG00000042390	1253.11	0.117645	0.076896	1.52993	0.126035	0.999982	Gatad2b
ENSMUSG00000024759	1776.25	0.129202	0.0844514	1.5299	0.126042	0.999982	Atl3
ENSMUSG00000102742	2.13365	2.45792	1.60694	1.52957	0.126123	0.999982	Pcdhga11
ENSMUSG00000053113	91.2813	0.422999	0.276631	1.52911	0.126238	0.999982	Socs3
ENSMUSG00000022367	9.1233	1.12337	0.734883	1.52863	0.126356	0.999982	Has2
ENSMUSG00000033952	787.786	0.177948	0.116424	1.52845	0.1264	0.999982	Aspm
ENSMUSG00000022219	117.246	-0.31058	0.203231	-1.52821	0.12646	0.999982	Cideb
ENSMUSG00000014813	8.09171	-3.13703	2.05283	-1.52814	0.126477	0.999982	Stc1
ENSMUSG00000091238	161.571	0.280468	0.183557	1.52796	0.126523	0.999982	NA
ENSMUSG00000037606	49.0325	0.472109	0.309019	1.52776	0.126571	0.999982	Osbpl5
ENSMUSG00000031902	1842.87	0.109596	0.0717458	1.52756	0.126622	0.999982	Nfatc3
ENSMUSG00000062794	75.6411	-0.371667	0.243495	-1.52638	0.126914	0.999982	Zfp599
ENSMUSG00000048852	139.579	-0.379552	0.24872	-1.52602	0.127005	0.999982	Gm12185
ENSMUSG00000079625	0.990776	3.42986	2.24811	1.52566	0.127094	NA	Tm4sf19
ENSMUSG00000109231	0.990776	3.42986	2.24811	1.52566	0.127094	NA	NA
ENSMUSG00000022687	3.62491	-1.76408	1.15641	-1.52549	0.127138	0.999982	Boc
ENSMUSG00000031137	172.059	0.276204	0.181118	1.52499	0.127261	0.999982	Fgf13
ENSMUSG00000080763	18.5341	-0.74419	0.488162	-1.52447	0.127391	0.999982	Gm12341
ENSMUSG00000040940	4904.41	0.0913811	0.0599443	1.52443	0.127401	0.999982	Arhgef1
ENSMUSG00000085990	174.287	0.309968	0.203341	1.52437	0.127416	0.999982	Gm16731
ENSMUSG00000024019	94.1757	-0.32963	0.216326	-1.52377	0.127567	0.999982	Cmtr1
ENSMUSG00000081895	64.5479	-0.414848	0.272329	-1.52333	0.127676	0.999982	Rpl17-ps10
ENSMUSG00000097133	184.257	0.26366	0.173159	1.52265	0.127847	0.999982	Gm26628
ENSMUSG00000035764	410.076	-0.176641	0.116016	-1.52255	0.127871	0.999982	Fbxo45
ENSMUSG00000026586	20.2351	-0.789716	0.51874	-1.52237	0.127915	0.999982	Prrx1
ENSMUSG00000012519	95.2234	-0.344758	0.226523	-1.52196	0.12802	0.999982	Mlkl
ENSMUSG00000004771	336.572	-0.193574	0.127191	-1.52192	0.128029	0.999982	Rab11a
ENSMUSG00000025757	971.335	0.140369	0.0922612	1.52143	0.128152	0.999982	Hspa4l
ENSMUSG00000029992	1283.94	0.118047	0.0775999	1.52122	0.128204	0.999982	Gfpt1
ENSMUSG00000086405	1.12107	3.61414	2.37588	1.52118	0.128215	NA	NA
ENSMUSG00000057378	3.16571	1.89057	1.24293	1.52106	0.128245	0.999982	Ryr3
ENSMUSG00000023021	738.345	0.142501	0.0936874	1.52103	0.128252	0.999982	Cers5
ENSMUSG00000026639	80.1648	0.388986	0.25574	1.52103	0.128253	0.999982	Lamb3
ENSMUSG00000118504	12.5271	0.934014	0.614334	1.52037	0.128419	0.999982	NA
ENSMUSG00000101695	117.324	0.319311	0.210038	1.52025	0.128447	0.999982	1700094J05Rik
ENSMUSG00000090964	29.5891	-0.652702	0.429394	-1.52005	0.128498	0.999982	NA
ENSMUSG00000120443	4.34972	-1.72113	1.13232	-1.52	0.128511	0.999982	NA
ENSMUSG00000000792	0.999308	3.4401	2.26357	1.51977	0.12857	NA	Slc5a5
ENSMUSG00000044296	0.999308	3.4401	2.26357	1.51977	0.12857	NA	Zfp879
ENSMUSG00000059493	0.991103	-3.44579	2.26765	-1.51954	0.128626	NA	Nhs
ENSMUSG00000102190	0.991103	-3.44579	2.26765	-1.51954	0.128626	NA	NA
ENSMUSG00000021420	1413.34	-0.563345	0.370848	-1.51907	0.128745	0.999982	Fars2
ENSMUSG00000110825	1.49771	-2.91013	1.91632	-1.5186	0.128863	0.999982	Gm8959
ENSMUSG00000034163	373.406	0.208592	0.13736	1.51857	0.12887	0.999982	Zfc3h1
ENSMUSG00000087190	1200.95	-0.119219	0.0785079	-1.51856	0.128872	0.999982	NA
ENSMUSG00000090126	33.9184	-0.618717	0.407447	-1.51852	0.128883	0.999982	NA
ENSMUSG00000052563	5.99939	-1.41326	0.930868	-1.51821	0.128961	0.999982	D930048N14Rik
ENSMUSG00000006717	75.4197	-0.373981	0.246349	-1.51809	0.128992	0.999982	Acot13
ENSMUSG00000108298	90.6938	-0.355261	0.234084	-1.51767	0.129099	0.999982	NA
ENSMUSG00000121177	1.49364	-2.91013	1.91761	-1.51758	0.12912	0.999982	NA
ENSMUSG00000048007	301.165	-0.217742	0.14348	-1.51758	0.129121	0.999982	Timm8a1
ENSMUSG00000020315	2775.89	0.105999	0.0698575	1.51736	0.129175	0.999982	Sptbn1
ENSMUSG00000047260	780.945	-0.146432	0.0965119	-1.51725	0.129204	0.999982	Emc6
ENSMUSG00000070733	1376.8	0.129051	0.0850612	1.51715	0.129228	0.999982	Fryl
ENSMUSG00000039016	460.936	-0.202655	0.133577	-1.51714	0.12923	0.999982	Timm8b
ENSMUSG00000024436	862.66	0.132525	0.0873528	1.51713	0.129235	0.999982	Mrps18b
ENSMUSG00000029199	461.379	0.162801	0.10732	1.51697	0.129275	0.999982	Lias
ENSMUSG00000021258	1141.81	0.119111	0.07856	1.51618	0.129474	0.999982	Ccnk
ENSMUSG00000022114	17.2051	-0.836848	0.552215	-1.51544	0.129661	0.999982	Spry2
ENSMUSG00000024914	1179.78	-0.119606	0.078944	-1.51507	0.129755	0.999982	Drap1
ENSMUSG00000056459	211.753	-0.228501	0.150829	-1.51497	0.12978	0.999982	Zbtb25
ENSMUSG00000058325	10.1721	1.02169	0.674767	1.51413	0.129992	0.999982	Dock1
ENSMUSG00000046157	770.412	-0.184126	0.121707	-1.51286	0.130314	0.999982	Tmem229b
ENSMUSG00000103133	2.18159	2.4449	1.61686	1.51213	0.1305	0.999982	NA
ENSMUSG00000068854	9.12782	-1.04912	0.69406	-1.51156	0.130645	0.999982	H2bc21
ENSMUSG00000030189	8527.35	-0.104659	0.0692538	-1.51123	0.130729	0.999982	Ybx3
ENSMUSG00000047342	8.98086	-1.1674	0.772704	-1.5108	0.130839	0.999982	Zfp286
ENSMUSG00000036270	1180.5	0.119432	0.0790588	1.51067	0.130872	0.999982	Edc4
ENSMUSG00000026281	1438.48	-0.130206	0.0862334	-1.50992	0.131063	0.999982	Dtymk
ENSMUSG00000024241	455.786	0.173673	0.115069	1.50929	0.131225	0.999982	Sos1
ENSMUSG00000103574	2.12919	2.45557	1.62736	1.50893	0.131318	0.999982	NA
ENSMUSG00000049470	1072.63	0.159701	0.105844	1.50883	0.131342	0.999982	Aff4
ENSMUSG00000036432	379.105	-0.195701	0.129711	-1.50874	0.131364	0.999982	Siah2
ENSMUSG00000023274	5841.82	0.0899304	0.0596346	1.50802	0.131548	0.999982	Cd4
ENSMUSG00000074994	396.319	0.22136	0.146794	1.50796	0.131566	0.999982	Qser1
ENSMUSG00000022231	1.53385	-2.93399	1.9458	-1.50786	0.13159	0.999982	Sema5a
ENSMUSG00000103887	1.53385	-2.93399	1.9458	-1.50786	0.13159	0.999982	NA
ENSMUSG00000053774	812.393	0.145261	0.0963871	1.50706	0.131795	0.999982	Ubxn7
ENSMUSG00000034593	782.665	0.163444	0.108509	1.50627	0.131997	0.999982	Myo5a
ENSMUSG00000059878	473.633	-0.166194	0.110337	-1.50624	0.132004	0.999982	Zfp422
ENSMUSG00000086240	63.7272	-0.403302	0.267772	-1.50614	0.132032	0.999982	NA
ENSMUSG00000031574	15.1438	-0.847994	0.563032	-1.50612	0.132036	0.999982	Star
ENSMUSG00000056014	56.6817	0.421663	0.279984	1.50603	0.132061	0.999982	A430033K04Rik
ENSMUSG00000064871	2.22126	-2.50569	1.66487	-1.50503	0.132315	0.999982	Snord58b
ENSMUSG00000021606	646.505	-0.170969	0.113601	-1.50499	0.132326	0.999982	Ndufs6
ENSMUSG00000044791	1078.98	0.162339	0.107902	1.50451	0.132451	0.999982	Setd2
ENSMUSG00000103408	6.75252	1.25156	0.832188	1.50394	0.132597	0.999982	NA
ENSMUSG00000020908	0.982245	3.41956	2.27387	1.50385	0.132619	NA	Myh3
ENSMUSG00000029130	0.982245	3.41956	2.27387	1.50385	0.132619	NA	Rnf32
ENSMUSG00000109931	0.982245	3.41956	2.27387	1.50385	0.132619	NA	NA
ENSMUSG00000091102	480.806	0.16561	0.110207	1.50271	0.132913	0.999982	NA
ENSMUSG00000045763	43.7538	-0.474358	0.315814	-1.50202	0.133092	0.999982	Basp1
ENSMUSG00000040660	17.1862	-0.813015	0.541625	-1.50107	0.133338	0.999982	Cyp2b9
ENSMUSG00000081331	3.15161	-1.93146	1.28676	-1.50103	0.133348	0.999982	NA
ENSMUSG00000017760	606.64	0.163119	0.108697	1.50067	0.13344	0.999982	Ctsa
ENSMUSG00000026644	1.47943	-2.89428	1.92885	-1.50053	0.133478	0.999982	Acbd7
ENSMUSG00000086320	1.47943	-2.89428	1.92885	-1.50053	0.133478	0.999982	NA
ENSMUSG00000021756	926.822	0.14028	0.0934972	1.50036	0.13352	0.999982	Il6st
ENSMUSG00000055945	0.978173	3.41456	2.27637	1.5	0.133614	NA	Prr18
ENSMUSG00000037563	9430.51	-0.094524	0.0630311	-1.49964	0.133708	0.999982	Rps16
ENSMUSG00000038369	634.561	0.170896	0.113961	1.4996	0.133718	0.999982	Ncoa6
ENSMUSG00000072772	4.71726	1.57126	1.04808	1.49918	0.133826	0.999982	Grcc10
ENSMUSG00000097487	93.1348	-0.342649	0.228602	-1.49889	0.133903	0.999982	Ptges3l
ENSMUSG00000059070	13018	-0.110964	0.0740621	-1.49825	0.134068	0.999982	Rpl18
ENSMUSG00000086459	112.121	-0.328062	0.219027	-1.49782	0.13418	0.999982	1700030C12Rik
ENSMUSG00000043872	548.292	-0.164691	0.109958	-1.49776	0.134195	0.999982	Zmym1
ENSMUSG00000035004	1.63125	3.03549	2.02762	1.49707	0.134374	0.999982	Igsf6
ENSMUSG00000036087	1406.4	0.108382	0.0724078	1.49683	0.134437	0.999982	Slain2
ENSMUSG00000020288	631.702	0.145842	0.0974351	1.49682	0.134441	0.999982	Ahsa2
ENSMUSG00000039989	550.916	0.207291	0.138539	1.49626	0.134585	0.999982	Cbx4
ENSMUSG00000064280	1.49401	2.88052	1.92535	1.49611	0.134626	0.999982	Ccdc146
ENSMUSG00000059602	40.7719	-0.50765	0.339527	-1.49517	0.13487	0.999982	Syn3
ENSMUSG00000040717	4.50356	-1.54677	1.03466	-1.49496	0.134924	0.999982	Il17rd
ENSMUSG00000068314	33.1904	-0.585646	0.391751	-1.49494	0.134929	0.999982	NA
ENSMUSG00000104862	1.55213	-2.9501	1.97425	-1.49429	0.135099	0.999982	Gm6520
ENSMUSG00000031109	115.629	0.30483	0.204047	1.49392	0.135197	0.999982	Enox2
ENSMUSG00000112922	4.48084	-1.53501	1.02755	-1.49386	0.135213	0.999982	NA
ENSMUSG00000118038	1.48467	2.88052	1.92833	1.49379	0.13523	0.999982	Gm9895
ENSMUSG00000033590	3.62857	-1.76008	1.17869	-1.49325	0.135372	0.999982	Myo5c
ENSMUSG00000034187	974.296	0.124881	0.0836442	1.493	0.135437	0.999982	Nsf
ENSMUSG00000029227	1754.39	0.109185	0.0731475	1.49267	0.135523	0.999982	Fip1l1
ENSMUSG00000115219	67.5712	-0.42029	0.281578	-1.49262	0.135536	0.999982	Eef1akmt4
ENSMUSG00000047963	11.6831	0.998865	0.669596	1.49174	0.135767	0.999982	Stbd1
ENSMUSG00000025701	1.47573	2.88052	1.93121	1.49156	0.135814	0.999982	Alox5
ENSMUSG00000030763	410.817	-0.174607	0.117134	-1.49066	0.136052	0.999982	Lcmt1
ENSMUSG00000025402	2716.75	-0.097678	0.06553	-1.49058	0.136071	0.999982	Nab2
ENSMUSG00000026628	142.653	-0.312102	0.209382	-1.49058	0.136071	0.999982	Atf3
ENSMUSG00000030137	1.507	2.89176	1.94014	1.49049	0.136095	0.999982	Tuba8
ENSMUSG00000110393	27.3578	0.620512	0.416322	1.49046	0.136103	0.999982	NA
ENSMUSG00000068220	881.424	0.181226	0.121707	1.48904	0.136478	0.999982	Lgals1
ENSMUSG00000027505	0.986316	3.42452	2.30041	1.48866	0.136578	NA	Fam209
ENSMUSG00000026112	1812.78	0.109344	0.0734852	1.48797	0.136758	0.999982	Coa5
ENSMUSG00000024835	935.526	-0.124481	0.083664	-1.48786	0.136787	0.999982	Coro1b
ENSMUSG00000021669	1379.91	0.133994	0.0900636	1.48777	0.136812	0.999982	Cert1
ENSMUSG00000113340	6.35081	-1.30764	0.879459	-1.48687	0.13705	0.999982	Gm7695
ENSMUSG00000036377	6.09864	-1.40463	0.944728	-1.48681	0.137066	0.999982	Cracd
ENSMUSG00000042694	171.08	0.262666	0.17667	1.48676	0.137077	0.999982	Stn1
ENSMUSG00000020901	165.04	0.339508	0.228367	1.48668	0.1371	0.999982	Pik3r5
ENSMUSG00000030207	248.212	0.211941	0.142568	1.48659	0.137123	0.999982	Fam234b
ENSMUSG00000026511	1390.31	-0.120849	0.0813	-1.48645	0.13716	0.999982	Srp9
ENSMUSG00000112458	1.47902	-2.89401	1.94693	-1.48645	0.137161	0.999982	NA
ENSMUSG00000054594	1.46759	2.87332	1.93319	1.48631	0.137197	0.999982	Oscar
ENSMUSG00000032135	16.9546	0.769601	0.517793	1.48631	0.137197	0.999982	Mcam
ENSMUSG00000020032	9.84647	-1.08924	0.732898	-1.48622	0.137222	0.999982	Nuak1
ENSMUSG00000068580	159.238	0.258904	0.17422	1.48608	0.137259	0.999982	Zfyve19
ENSMUSG00000083885	1.48834	2.89155	1.9461	1.48582	0.137326	0.999982	NA
ENSMUSG00000025290	9981.19	-0.115436	0.0777087	-1.4855	0.137413	0.999982	Rps24
ENSMUSG00000102275	4.13966	-1.66077	1.11832	-1.48506	0.137529	0.999982	NA
ENSMUSG00000042712	290.162	-0.231055	0.155605	-1.48488	0.137576	0.999982	Tceal9
ENSMUSG00000003948	793.727	-0.145206	0.0978242	-1.48435	0.137715	0.999982	Mmd
ENSMUSG00000047843	251.505	-0.247201	0.16657	-1.48407	0.137791	0.999982	Bri3
ENSMUSG00000052271	0.973241	-3.4237	2.30771	-1.48359	0.137917	NA	Bhlha15
ENSMUSG00000027966	4.5079	-1.82198	1.22879	-1.48274	0.138143	0.999982	Col11a1
ENSMUSG00000019850	447.117	0.198713	0.134019	1.48272	0.138148	0.999982	Tnfaip3
ENSMUSG00000020190	3906.61	0.111601	0.07528	1.48248	0.138213	0.999982	Mknk2
ENSMUSG00000097535	17.6455	-0.739888	0.499601	-1.48096	0.138618	0.999982	NA
ENSMUSG00000054000	45.1144	-0.477462	0.32243	-1.48082	0.138653	0.999982	Tusc1
ENSMUSG00000097729	15.1219	0.802425	0.541916	1.48072	0.138681	0.999982	NA
ENSMUSG00000023972	35.379	0.540057	0.364753	1.48061	0.138711	0.999982	Ptk7
ENSMUSG00000020610	509.636	-0.152536	0.103025	-1.48057	0.138721	0.999982	Amz2
ENSMUSG00000021500	3041.9	0.107971	0.0729279	1.48052	0.138736	0.999982	Ddx46
ENSMUSG00000063018	87.8322	-0.360319	0.243455	-1.48002	0.138867	0.999982	NA
ENSMUSG00000120551	1.46602	-2.88606	1.95048	-1.47967	0.138962	0.999982	NA
ENSMUSG00000050199	14.8109	-0.908759	0.614239	-1.47949	0.13901	0.999982	Lgr4
ENSMUSG00000068732	248.229	0.212862	0.143896	1.47928	0.139066	0.999982	Tmem167b
ENSMUSG00000034940	580.752	0.160345	0.108405	1.47913	0.139105	0.999982	Synrg
ENSMUSG00000021917	785.749	-0.158491	0.107172	-1.47885	0.13918	0.999982	Spcs1
ENSMUSG00000069020	450.529	0.167298	0.113137	1.47872	0.139215	0.999982	Urm1
ENSMUSG00000066245	41.8094	-0.517148	0.349732	-1.4787	0.139221	0.999982	NA
ENSMUSG00000001909	1133.7	0.120971	0.0818477	1.478	0.139409	0.999982	Trmt1
ENSMUSG00000033799	656.183	0.158312	0.107115	1.47797	0.139417	0.999982	Tasor2
ENSMUSG00000090019	1319.66	-0.116462	0.078812	-1.47772	0.139482	0.999982	Gimap1
ENSMUSG00000048874	1290.17	0.126822	0.0858433	1.47737	0.139577	0.999982	Phf3
ENSMUSG00000024579	147.295	-0.279663	0.189414	-1.47646	0.139819	0.999982	Pcyox1l
ENSMUSG00000025486	55.9483	-0.439458	0.298027	-1.47456	0.140331	0.999982	Sirt3
ENSMUSG00000050677	2.67997	2.10315	1.42634	1.4745	0.140346	0.999982	Ccdc96
ENSMUSG00000083429	1.4814	2.86942	1.9463	1.4743	0.140402	0.999982	NA
ENSMUSG00000038932	1.20522	3.70601	2.51385	1.47424	0.140418	NA	Tcfl5
ENSMUSG00000089999	51.0981	-0.455147	0.308809	-1.47388	0.140515	0.999982	NA
ENSMUSG00000061477	9876.66	-0.0894009	0.0606633	-1.47372	0.140556	0.999982	Rps7
ENSMUSG00000073902	1116.35	0.170408	0.115639	1.47361	0.140586	0.999982	NA
ENSMUSG00000040339	391.186	0.20391	0.138385	1.4735	0.140616	0.999982	Eeig2
ENSMUSG00000104713	260.051	-0.249845	0.169583	-1.47329	0.140673	0.999982	Gbp6
ENSMUSG00000060429	214.662	0.259499	0.17623	1.4725	0.140887	0.999982	Sntb1
ENSMUSG00000024451	2.13851	2.4395	1.65785	1.47148	0.141161	0.999982	Arap3
ENSMUSG00000018919	20.3857	0.679909	0.462072	1.47143	0.141174	0.999982	Tm4sf5
ENSMUSG00000064210	608.394	0.151858	0.103297	1.4701	0.141534	0.999982	Ano6
ENSMUSG00000029165	807.438	-0.157055	0.106839	-1.47001	0.141558	0.999982	Agbl5
ENSMUSG00000028991	748.782	0.13548	0.0922043	1.46934	0.14174	0.999982	Mtor
ENSMUSG00000021840	2901.98	0.102331	0.0696598	1.46902	0.141829	0.999982	Mapk1ip1l
ENSMUSG00000037542	16.8473	-0.827353	0.563642	-1.46787	0.14214	0.999982	Aldh8a1
ENSMUSG00000030677	959.66	-0.127714	0.0870487	-1.46716	0.142333	0.999982	Kif22
ENSMUSG00000102600	1.45906	2.86575	1.95333	1.46711	0.142346	0.999982	NA
ENSMUSG00000079487	1421.46	0.128037	0.0872845	1.4669	0.142403	0.999982	Med12
ENSMUSG00000005732	1120.49	-0.11936	0.0813836	-1.46664	0.142475	0.999982	Ranbp1
ENSMUSG00000022529	263.227	-0.203003	0.138419	-1.46659	0.142489	0.999982	Zfp263
ENSMUSG00000035439	299.759	0.19186	0.130895	1.46576	0.142714	0.999982	Haus8
ENSMUSG00000078308	2.22125	-2.52855	1.72591	-1.46505	0.142906	0.999982	NA
ENSMUSG00000040850	1315.62	0.110467	0.0754269	1.46455	0.143043	0.999982	Psme4
ENSMUSG00000115700	2.59913	-2.09588	1.43123	-1.4644	0.143086	0.999982	Gm7517
ENSMUSG00000027164	1197.39	0.111585	0.0762545	1.46333	0.143377	0.999982	Traf6
ENSMUSG00000064179	56.0942	-0.419306	0.286605	-1.46301	0.143465	0.999982	Tnnt1
ENSMUSG00000069014	96.9988	-0.446629	0.305284	-1.46299	0.143469	0.999982	Gm5641
ENSMUSG00000069014	96.9988	-0.446629	0.305284	-1.46299	0.143469	0.999982	Gm6793
ENSMUSG00000021765	1.4672	2.87299	1.96395	1.46286	0.143505	0.999982	Fst
ENSMUSG00000039844	2906.96	0.0996787	0.0681454	1.46273	0.14354	0.999982	Rapgef1
ENSMUSG00000026596	688.18	0.149319	0.102084	1.4627	0.143548	0.999982	Abl2
ENSMUSG00000057286	25.0707	0.633474	0.433125	1.46257	0.143586	0.999982	St6galnac2
ENSMUSG00000056234	528.944	0.15098	0.103265	1.46207	0.143722	0.999982	Ncoa4
ENSMUSG00000029649	2617.47	-0.113954	0.0779516	-1.46186	0.14378	0.999982	Pomp
ENSMUSG00000014198	11.5558	-0.927465	0.634539	-1.46164	0.143841	0.999982	Zfp385c
ENSMUSG00000039908	16.1178	0.801717	0.548622	1.46133	0.143925	0.999982	Slc26a11
ENSMUSG00000026275	1104.52	0.115185	0.0788346	1.4611	0.143988	0.999982	Ppp1r7
ENSMUSG00000042622	115.2	-0.302553	0.207104	-1.46087	0.14405	0.999982	Maff
ENSMUSG00000097021	1.46352	2.86957	1.96486	1.46044	0.144168	0.999982	4933433G15Rik
ENSMUSG00000001768	7.03363	1.20166	0.822878	1.46031	0.144205	0.999982	Rin2
ENSMUSG00000001768	7.03363	1.20166	0.822878	1.46031	0.144205	0.999982	BC039771
ENSMUSG00000112806	3.12727	-1.88823	1.29359	-1.45968	0.144378	0.999982	NA
ENSMUSG00000057400	163.856	-0.342615	0.234797	-1.45919	0.144512	0.999982	Ces1c
ENSMUSG00000036292	16.0593	0.793335	0.543688	1.45917	0.144518	0.999982	Gramd1c
ENSMUSG00000097564	152.592	0.252021	0.172785	1.45859	0.144679	0.999982	NA
ENSMUSG00000076498	2643.08	-0.128236	0.0879273	-1.45843	0.144721	0.999982	Trbc2
ENSMUSG00000015937	4352.49	-0.103825	0.0711961	-1.4583	0.144758	0.999982	Macroh2a1
ENSMUSG00000053358	438.665	-0.18971	0.130126	-1.4579	0.144869	0.999982	NA
ENSMUSG00000054626	9.3244	-1.10484	0.758346	-1.4569	0.145143	0.999982	Xlr
ENSMUSG00000042524	1424.18	0.125523	0.0861964	1.45624	0.145326	0.999982	Sun2
ENSMUSG00000063286	901.217	0.173462	0.119129	1.45608	0.145369	0.999982	Gm8995
ENSMUSG00000029455	663.452	-0.141837	0.0974128	-1.45604	0.145381	0.999982	Aldh2
ENSMUSG00000037060	31.3731	-0.552091	0.379219	-1.45586	0.14543	0.999982	Cavin3
ENSMUSG00000047731	592.635	0.145648	0.100071	1.45545	0.145546	0.999982	Wbp1l
ENSMUSG00000027832	21.9427	-0.679366	0.466781	-1.45543	0.145551	0.999982	Ptx3
ENSMUSG00000034438	86.4489	-0.357285	0.24581	-1.4535	0.146085	0.999982	Gbp8
ENSMUSG00000113471	24.4401	-0.637042	0.438282	-1.4535	0.146085	0.999982	NA
ENSMUSG00000051671	195.175	-0.248247	0.170831	-1.45318	0.146174	0.999982	Coa6
ENSMUSG00000033658	804.171	0.132938	0.0914935	1.45298	0.14623	0.999982	Ddx19b
ENSMUSG00000065954	499.184	0.165788	0.114116	1.45281	0.146277	0.999982	Tacc1
ENSMUSG00000027878	1542.3	0.116822	0.0804281	1.4525	0.146362	0.999982	Notch2
ENSMUSG00000085875	333.277	-0.180251	0.124169	-1.45166	0.146596	0.999982	NA
ENSMUSG00000039001	2744.58	-0.35805	0.246794	-1.4508	0.146834	0.999982	Rps21
ENSMUSG00000044390	12.8112	0.88247	0.608495	1.45025	0.146989	0.999982	Tigd3
ENSMUSG00000100548	924.268	0.124253	0.085701	1.44985	0.147101	0.999982	NA
ENSMUSG00000031751	1920.49	0.0976717	0.0673828	1.44951	0.147196	0.999982	Amfr
ENSMUSG00000026873	468.131	0.159584	0.110148	1.44881	0.14739	0.999982	Phf19
ENSMUSG00000030393	58.257	0.416401	0.287437	1.44867	0.14743	0.999982	Zik1
ENSMUSG00000078486	2.6239	2.09053	1.4432	1.44854	0.147467	0.999982	Perm1
ENSMUSG00000068457	210.292	0.225361	0.155596	1.44837	0.147513	0.999982	Uty
ENSMUSG00000114036	3.94745	-1.59194	1.09929	-1.44815	0.147575	0.999982	NA
ENSMUSG00000050232	26.0832	0.650018	0.448972	1.44779	0.147676	0.999982	Cxcr3
ENSMUSG00000117477	47.6145	-0.446017	0.308148	-1.44741	0.147782	0.999982	NA
ENSMUSG00000015337	385.668	-0.178573	0.123388	-1.44725	0.147827	0.999982	Endog
ENSMUSG00000000420	1718.82	0.105451	0.0728826	1.44686	0.147936	0.999982	Galnt1
ENSMUSG00000038291	760.911	-0.139099	0.0961621	-1.44651	0.148035	0.999982	Snx25
ENSMUSG00000092341	581.509	-0.189333	0.1309	-1.4464	0.148066	0.999982	Malat1
ENSMUSG00000046841	85.1032	-0.350295	0.242347	-1.44543	0.148337	0.999982	Ckap4
ENSMUSG00000025408	136.025	-0.334922	0.231739	-1.44525	0.148387	0.999982	Ddit3
ENSMUSG00000028577	2015.7	0.110986	0.0768383	1.44441	0.148625	0.999982	Plaa
ENSMUSG00000029377	7.42651	-1.14863	0.795431	-1.44404	0.148728	0.999982	Ereg
ENSMUSG00000031458	23.0431	-0.660397	0.457335	-1.44401	0.148735	0.999982	Coprs
ENSMUSG00000120926	177.896	-0.307787	0.213182	-1.44378	0.148802	0.999982	NA
ENSMUSG00000114369	4.82407	-1.41312	0.978874	-1.44362	0.148847	0.999982	NA
ENSMUSG00000072774	25.5787	-0.644945	0.446769	-1.44358	0.148858	0.999982	Zfp951
ENSMUSG00000044148	458.511	0.170471	0.118092	1.44354	0.148868	0.999982	1810030O07Rik
ENSMUSG00000098915	36.0017	-0.552468	0.383067	-1.44222	0.14924	0.999982	NA
ENSMUSG00000097125	531.577	0.176629	0.12253	1.44152	0.149438	0.999982	NA
ENSMUSG00000027954	1.47127	2.87657	1.99595	1.4412	0.149527	0.999982	Efna1
ENSMUSG00000082044	116.626	-0.309193	0.214549	-1.44112	0.149549	0.999982	NA
ENSMUSG00000030731	1.01913	-3.47974	2.41484	-1.44098	0.149591	NA	Syt3
ENSMUSG00000120573	1.01913	-3.47974	2.41484	-1.44098	0.149591	NA	NA
ENSMUSG00000021279	66.9295	-0.371375	0.25774	-1.44089	0.149616	0.999982	Cdc42bpb
ENSMUSG00000031672	5574.12	0.0816352	0.0566632	1.44071	0.149667	0.999982	Got2
ENSMUSG00000085003	1.01831	-3.47908	2.41543	-1.44036	0.149766	NA	NA
ENSMUSG00000003779	1515.6	0.118743	0.082443	1.4403	0.149782	0.999982	Kif20a
ENSMUSG00000029438	190.944	-0.245844	0.170718	-1.44005	0.149852	0.999982	Bcl7a
ENSMUSG00000023089	572.84	-0.181668	0.126154	-1.44005	0.149853	0.999982	Ndufa5
ENSMUSG00000021886	163.988	0.261576	0.181653	1.43998	0.149874	0.999982	Gpr65
ENSMUSG00000042608	1047.68	0.116897	0.0811817	1.43995	0.149882	0.999982	Stk40
ENSMUSG00000026790	910.326	0.128672	0.0893974	1.43933	0.150057	0.999982	Odf2
ENSMUSG00000120854	1.55253	-2.95907	2.05603	-1.43922	0.150089	0.999982	NA
ENSMUSG00000029468	19.716	0.741196	0.515087	1.43897	0.150159	0.999982	P2rx7
ENSMUSG00000028106	668.018	0.137662	0.0956864	1.43868	0.15024	0.999982	Rprd2
ENSMUSG00000030847	105.859	0.315976	0.219731	1.43802	0.150429	0.999982	Bag3
ENSMUSG00000067148	959.214	-0.132763	0.0923319	-1.43789	0.150466	0.999982	Polr1c
ENSMUSG00000044595	64.6868	-0.417671	0.290496	-1.43779	0.150494	0.999982	Dnd1
ENSMUSG00000048271	1110.06	0.120857	0.0840678	1.43761	0.150543	0.999982	Rbm33
ENSMUSG00000085391	1.0374	-3.50209	2.43672	-1.43722	0.150657	NA	NA
ENSMUSG00000015478	446.514	-0.158774	0.110474	-1.43721	0.150658	0.999982	Rnf5
ENSMUSG00000034832	1387.54	0.11834	0.082403	1.43612	0.150969	0.999982	Tet3
ENSMUSG00000098912	331.141	0.19853	0.138295	1.43555	0.15113	0.999982	1500004A13Rik
ENSMUSG00000021214	97.0607	-0.325269	0.226613	-1.43535	0.151187	0.999982	Akr1c18
ENSMUSG00000031386	4410.19	0.109186	0.0760885	1.43499	0.15129	0.999982	Hcfc1
ENSMUSG00000036323	2775.22	0.0893166	0.0622447	1.43493	0.151308	0.999982	Srp72
ENSMUSG00000032890	25.3845	-0.603479	0.420607	-1.43478	0.15135	0.999982	Rims3
ENSMUSG00000056665	493.069	0.159364	0.111076	1.43473	0.151363	0.999982	Them6
ENSMUSG00000095159	34.7993	-0.533961	0.372286	-1.43428	0.151493	0.999982	Tubb4b-ps1
ENSMUSG00000020785	13.6954	0.847352	0.590857	1.43411	0.151541	0.999982	Camkk1
ENSMUSG00000026288	1214.28	0.121027	0.0843978	1.43401	0.15157	0.999982	Inpp5d
ENSMUSG00000000782	3375.32	0.105394	0.0735107	1.43373	0.15165	0.999982	Tcf7
ENSMUSG00000091154	159.226	0.261901	0.182778	1.43289	0.151889	0.999982	NA
ENSMUSG00000062040	98.9153	0.308426	0.21529	1.43261	0.151969	0.999982	Zfp27
ENSMUSG00000079108	297.797	-0.187752	0.131119	-1.43192	0.152166	0.999982	Srp54c
ENSMUSG00000038622	570.683	-0.164693	0.115036	-1.43167	0.152238	0.999982	Med30
ENSMUSG00000046204	1.01598	3.46104	2.41789	1.43143	0.152308	NA	Pnma2
ENSMUSG00000040423	895.067	0.150526	0.105171	1.43125	0.152359	0.999982	Rc3h1
ENSMUSG00000022390	1259.01	0.11835	0.0826957	1.43115	0.152387	0.999982	Zc3h7b
ENSMUSG00000037161	3.14432	-1.88238	1.31579	-1.43061	0.152542	0.999982	Mgarp
ENSMUSG00000037270	859.896	0.155163	0.10848	1.43034	0.152621	0.999982	Bltp1
ENSMUSG00000021496	181.835	-0.257494	0.180054	-1.43009	0.152691	0.999982	Pcbd2
ENSMUSG00000090812	8.92785	-1.02308	0.715694	-1.4295	0.152862	0.999982	Samd15
ENSMUSG00000113036	2.61007	-2.13407	1.49311	-1.42928	0.152924	0.999982	NA
ENSMUSG00000117249	1.00086	-3.45731	2.41895	-1.42926	0.15293	NA	NA
ENSMUSG00000086018	2.62752	-2.14391	1.5004	-1.4289	0.153034	0.999982	NA
ENSMUSG00000103986	1.00745	3.45058	2.41529	1.42864	0.153108	NA	NA
ENSMUSG00000015092	1323.35	-0.131486	0.0920486	-1.42844	0.153164	0.999982	Edf1
ENSMUSG00000085560	65.7054	-0.440044	0.308118	-1.42817	0.153244	0.999982	NA
ENSMUSG00000038028	370.968	-0.167098	0.117007	-1.4281	0.153264	0.999982	Tigar
ENSMUSG00000035673	567.151	0.149	0.104367	1.42766	0.15339	0.999982	Sbno2
ENSMUSG00000120356	34.1546	0.535865	0.375384	1.42751	0.153433	0.999982	NA
ENSMUSG00000001349	4.78837	1.38323	0.96902	1.42745	0.15345	0.999982	Cnn1
ENSMUSG00000024365	1.1455	3.64087	2.55127	1.42708	0.153557	NA	Cyp21a1
ENSMUSG00000062590	36.8656	0.496307	0.347838	1.42683	0.153628	0.999982	Armc9
ENSMUSG00000020205	387.346	0.177864	0.124685	1.42651	0.153721	0.999982	Phlda1
ENSMUSG00000002052	3212.39	0.100946	0.0707767	1.42626	0.153792	0.999982	Supt6
ENSMUSG00000031521	172.54	0.258873	0.181537	1.42601	0.153867	0.999982	Aga
ENSMUSG00000074398	199.916	-0.271127	0.190154	-1.42583	0.153918	0.999982	Gm15441
ENSMUSG00000102555	12.0714	0.911684	0.63954	1.42553	0.154003	0.999982	NA
ENSMUSG00000018585	339.524	-0.196818	0.138123	-1.42495	0.154172	0.999982	Atox1
ENSMUSG00000037337	1780.03	0.0994379	0.069818	1.42424	0.154376	0.999982	Map4k1
ENSMUSG00000022812	867.398	0.123938	0.0870292	1.42409	0.154419	0.999982	Gsk3b
ENSMUSG00000038295	73.9987	-0.379003	0.266138	-1.42409	0.154422	0.999982	Atg9b
ENSMUSG00000070806	1.00784	3.45097	2.42348	1.42397	0.154454	NA	Zmynd12
ENSMUSG00000040731	7140.52	0.078846	0.0553783	1.42377	0.154513	0.999982	Eif4h
ENSMUSG00000021666	676.605	0.134704	0.0946226	1.42359	0.154566	0.999982	Gfm2
ENSMUSG00000025907	373.124	0.178038	0.125076	1.42343	0.15461	0.999982	Rb1cc1
ENSMUSG00000072676	440.427	0.164914	0.115858	1.42341	0.154616	0.999982	Tmem254
ENSMUSG00000026620	2.58127	-2.08553	1.46539	-1.4232	0.15468	0.999982	Mark1
ENSMUSG00000053897	352.275	0.191904	0.134886	1.42271	0.154819	0.999982	Slc39a8
ENSMUSG00000036964	11.3648	0.977314	0.687283	1.422	0.155027	0.999982	Trim17
ENSMUSG00000107881	7.49996	1.12798	0.793239	1.42199	0.155029	0.999982	NA
ENSMUSG00000086925	6.44861	-1.18631	0.834283	-1.42195	0.15504	0.999982	Gm6286
ENSMUSG00000121247	849.618	0.151378	0.10651	1.42126	0.155243	0.999982	NA
ENSMUSG00000115003	272.425	0.196409	0.138216	1.42103	0.155307	0.999982	NA
ENSMUSG00000022095	161.712	-0.25394	0.178708	-1.42098	0.155322	0.999982	Fhip2b
ENSMUSG00000075467	396.328	-0.168791	0.118808	-1.4207	0.155404	0.999982	Dnlz
ENSMUSG00000039648	66.5711	0.377358	0.265659	1.42046	0.155473	0.999982	Kyat1
ENSMUSG00000028245	770.092	0.129439	0.0911259	1.42044	0.155478	0.999982	Nsmaf
ENSMUSG00000056515	36.4633	-0.503141	0.354249	-1.4203	0.15552	0.999982	Rab31
ENSMUSG00000021078	44.1195	-0.533806	0.37586	-1.42023	0.155542	0.999982	Tomm20l
ENSMUSG00000020607	44.6986	-0.510548	0.359491	-1.4202	0.155551	0.999982	Lratd1
ENSMUSG00000095993	1.51921	2.90318	2.04453	1.41997	0.155616	0.999982	NA
ENSMUSG00000084111	268.151	-0.606638	0.427221	-1.41996	0.155619	0.999982	Gm15710
ENSMUSG00000026463	36.2763	0.505522	0.356024	1.41991	0.155633	0.999982	Atp2b4
ENSMUSG00000003348	1340.98	0.104222	0.0734034	1.41985	0.155652	0.999982	Mob3a
ENSMUSG00000070025	2.55151	-2.0448	1.4402	-1.4198	0.155666	0.999982	Gm10284
ENSMUSG00000034994	78898.2	0.0833548	0.0587259	1.41939	0.155786	0.999982	Eef2
ENSMUSG00000024527	1382.75	-0.104487	0.0736198	-1.41928	0.155818	0.999982	Afg3l2
ENSMUSG00000040533	1.02451	3.47163	2.44619	1.4192	0.155842	NA	Matn1
ENSMUSG00000086697	26.5881	-0.611973	0.43128	-1.41897	0.155908	0.999982	NA
ENSMUSG00000055184	181.174	-0.233523	0.164577	-1.41893	0.155921	0.999982	Fam72a
ENSMUSG00000024831	247.613	0.213489	0.150462	1.41889	0.15593	0.999982	Ighmbp2
ENSMUSG00000084883	265.737	0.198644	0.14005	1.41838	0.15608	0.999982	Ccdc85c
ENSMUSG00000040751	5.79448	1.3517	0.953093	1.41823	0.156125	0.999982	Lat2
ENSMUSG00000042462	898.55	-0.139716	0.0985163	-1.4182	0.156132	0.999982	Dctpp1
ENSMUSG00000024480	853.869	0.164751	0.116171	1.41818	0.156139	0.999982	Ap3s1
ENSMUSG00000120160	3.95776	1.5979	1.12679	1.4181	0.156163	0.999982	NA
ENSMUSG00000007476	39.8354	-0.492948	0.34763	-1.41803	0.156183	0.999982	Lrrc8a
ENSMUSG00000062328	7443.83	-0.101807	0.071815	-1.41763	0.156298	0.999982	Rpl17
ENSMUSG00000032604	2151.44	0.0951505	0.0671221	1.41757	0.156316	0.999982	Qars
ENSMUSG00000025323	281.851	0.197779	0.13954	1.41737	0.156376	0.999982	Sp4
ENSMUSG00000031015	206.176	0.215519	0.152086	1.41708	0.156459	0.999982	Swap70
ENSMUSG00000004591	817.872	0.132902	0.0937944	1.41695	0.156497	0.999982	Pkn2
ENSMUSG00000027398	0.99892	3.4401	2.42971	1.41585	0.15682	NA	Il1b
ENSMUSG00000040432	0.99892	3.4401	2.42971	1.41585	0.15682	NA	Ltb4r2
ENSMUSG00000048721	113.085	0.319294	0.225518	1.41582	0.156827	0.999982	Fndc9
ENSMUSG00000025372	182.919	0.226613	0.160076	1.41566	0.156876	0.999982	Baiap2
ENSMUSG00000047242	112.88	0.302553	0.213734	1.41555	0.156906	0.999982	Taf9b
ENSMUSG00000113472	1.02044	3.46662	2.44895	1.41555	0.156906	NA	NA
ENSMUSG00000085398	2.4777	1.98497	1.40236	1.41545	0.156936	0.999982	NA
ENSMUSG00000037933	651.945	0.142674	0.100802	1.41539	0.156954	0.999982	Bicd2
ENSMUSG00000022840	1.50094	2.90322	2.05126	1.41533	0.156971	0.999982	Adcy5
ENSMUSG00000118559	12.2604	0.893433	0.63147	1.41485	0.157113	0.999982	A930007A09Rik
ENSMUSG00000121072	5.654	-1.29765	0.917191	-1.4148	0.157126	0.999982	NA
ENSMUSG00000058331	34.6547	-0.505049	0.35701	-1.41466	0.157167	0.999982	Zfp85
ENSMUSG00000083380	18.5385	-0.868706	0.614661	-1.41331	0.157565	0.999982	Ndufb4c
ENSMUSG00000047434	470.255	0.16881	0.11946	1.4131	0.157626	0.999982	Xxylt1
ENSMUSG00000111968	3.43191	-1.67551	1.18603	-1.4127	0.157743	0.999982	NA
ENSMUSG00000030101	214.647	0.218763	0.154891	1.41237	0.15784	0.999982	Sumf1
ENSMUSG00000029408	87.096	0.377222	0.267092	1.41233	0.157854	0.999982	Abcb9
ENSMUSG00000000976	487.882	0.148554	0.105232	1.41168	0.158044	0.999982	Heatr6
ENSMUSG00000018196	305.721	-0.187103	0.132541	-1.41166	0.15805	0.999982	Glrx2
ENSMUSG00000046312	2.98053	-1.83646	1.30094	-1.41164	0.158055	0.999982	Myorg
ENSMUSG00000041571	1067.08	-0.131793	0.0933686	-1.41154	0.158086	0.999982	Selenow
ENSMUSG00000003731	830.851	0.123115	0.0872259	1.41146	0.15811	0.999982	Kpna6
ENSMUSG00000016619	2554.64	0.0873962	0.0619354	1.41109	0.158219	0.999982	Nup50
ENSMUSG00000044864	593.639	0.137094	0.0971726	1.41083	0.158294	0.999982	Ankrd50
ENSMUSG00000107802	249.841	0.199357	0.141316	1.41072	0.158328	0.999982	NA
ENSMUSG00000108888	185.714	-0.236911	0.167944	-1.41066	0.158346	0.999982	NA
ENSMUSG00000031292	53.1921	0.419235	0.297242	1.41042	0.158416	0.999982	Cdkl5
ENSMUSG00000005510	890.962	-0.1351	0.0958032	-1.41019	0.158484	0.999982	Ndufs3
ENSMUSG00000026991	973.799	0.12335	0.0874712	1.41017	0.158488	0.999982	Pkp4
ENSMUSG00000120003	1.98968	-2.32733	1.65052	-1.41005	0.158524	0.999982	NA
ENSMUSG00000092713	2.12866	-2.44678	1.73529	-1.41001	0.158536	0.999982	Gm22858
ENSMUSG00000027011	381.4	-0.164412	0.116606	-1.40998	0.158546	0.999982	Ube2e3
ENSMUSG00000042759	34.5674	-0.562332	0.398843	-1.40991	0.158566	0.999982	Apobr
ENSMUSG00000060036	22441	-0.0699285	0.0496514	-1.40839	0.159016	0.999982	Rpl3
ENSMUSG00000026568	306.186	-0.19659	0.139616	-1.40808	0.159108	0.999982	Mpc2
ENSMUSG00000117804	33.2996	-0.682414	0.484745	-1.40778	0.159197	0.999982	NA
ENSMUSG00000031302	0.982583	-3.43456	2.44041	-1.40737	0.159317	NA	Nlgn3
ENSMUSG00000098123	24.8742	-0.65946	0.468658	-1.40712	0.15939	0.999982	NA
ENSMUSG00000019818	2747.55	0.0861537	0.0612327	1.40699	0.159431	0.999982	Cd164
ENSMUSG00000058620	0.981761	-3.43389	2.44103	-1.40674	0.159504	NA	Adra2b
ENSMUSG00000029061	1.49241	2.8956	2.05844	1.40669	0.159518	0.999982	Mmp23
ENSMUSG00000071151	13.914	-0.834522	0.593483	-1.40614	0.159682	0.999982	Gm4799
ENSMUSG00000052407	37.0389	0.486967	0.346441	1.40563	0.159835	0.999982	Ccdc171
ENSMUSG00000037868	1033.47	-0.112521	0.0800775	-1.40515	0.159977	0.999982	Egr2
ENSMUSG00000101674	198.856	0.21799	0.155168	1.40486	0.160061	0.999982	NA
ENSMUSG00000023143	411.264	0.162419	0.115615	1.40482	0.160074	0.999982	Nagpa
ENSMUSG00000047733	6.13304	-1.23143	0.876885	-1.40432	0.160223	0.999982	Tmem262
ENSMUSG00000039691	1.117	3.60848	2.57033	1.4039	0.16035	NA	Tspan10
ENSMUSG00000092556	1.117	3.60848	2.57033	1.4039	0.16035	NA	NA
ENSMUSG00000120681	17.0298	0.750306	0.534489	1.40378	0.160384	0.999982	NA
ENSMUSG00000041959	709.671	0.151218	0.107727	1.40371	0.160404	0.999982	S100a10
ENSMUSG00000026663	500.747	0.185129	0.1319	1.40356	0.16045	0.999982	Atf6
ENSMUSG00000087444	48.8313	-0.437427	0.311707	-1.40333	0.16052	0.999982	Gm5475
ENSMUSG00000121411	3.44515	1.65234	1.17757	1.40318	0.160563	0.999982	NA
ENSMUSG00000025227	111.863	0.289828	0.206649	1.40252	0.160761	0.999982	Mfsd13a
ENSMUSG00000092203	374.326	-0.164228	0.117101	-1.40245	0.160781	0.999982	1110038B12Rik
ENSMUSG00000038384	523.708	0.150471	0.107328	1.40197	0.160924	0.999982	Setd1b
ENSMUSG00000022436	115.387	0.288171	0.205569	1.40182	0.160969	0.999982	Sh3bp1
ENSMUSG00000045435	92.1863	-0.31333	0.223555	-1.40158	0.161041	0.999982	Tmem60
ENSMUSG00000027673	780.466	-0.148287	0.105822	-1.40128	0.161129	0.999982	Ndufb5
ENSMUSG00000041415	1108.82	0.124645	0.0889506	1.40128	0.161131	0.999982	Dicer1
ENSMUSG00000031568	695.838	-0.134363	0.0958889	-1.40124	0.161143	0.999982	Rwdd4a
ENSMUSG00000050244	3846.45	0.0869065	0.0620272	1.4011	0.161183	0.999982	Heatr1
ENSMUSG00000022247	1614.87	0.102342	0.0730456	1.40106	0.161195	0.999982	Brix1
ENSMUSG00000039084	0.982633	3.41963	2.44132	1.40073	0.161296	NA	Chad
ENSMUSG00000021643	50.5524	-0.421882	0.301195	-1.40069	0.161306	0.999982	Serf1
ENSMUSG00000024392	4037.34	0.0876907	0.0626116	1.40055	0.161349	0.999982	Bag6
ENSMUSG00000073679	2.50928	-2.01356	1.43784	-1.4004	0.161393	0.999982	NA
ENSMUSG00000037913	85.572	-0.323967	0.231451	-1.39972	0.161596	0.999982	Tmem156
ENSMUSG00000039521	168.956	0.25723	0.183772	1.39972	0.161597	0.999982	Foxp3
ENSMUSG00000032757	148.461	0.258381	0.184626	1.39948	0.161668	0.999982	Bet1
ENSMUSG00000026126	364.152	-0.202678	0.144837	-1.39935	0.161708	0.999982	Ptpn18
ENSMUSG00000062284	23.2782	-0.609373	0.43548	-1.39931	0.161719	0.999982	NA
ENSMUSG00000120384	17.2149	-0.735735	0.525897	-1.39901	0.16181	0.999982	NA
ENSMUSG00000026049	324.579	-0.189134	0.135218	-1.39874	0.161891	0.999982	Tex30
ENSMUSG00000059658	6.66967	-1.25289	0.895864	-1.39853	0.161954	0.999982	NA
ENSMUSG00000061451	2.48328	-2.01471	1.44082	-1.3983	0.162022	0.999982	Tmem151a
ENSMUSG00000037296	359.021	-0.176666	0.126395	-1.39773	0.162194	0.999982	Lsm1
ENSMUSG00000121374	549.478	-0.943535	0.675327	-1.39715	0.162368	0.999982	NA
ENSMUSG00000024666	108.004	0.296194	0.212097	1.3965	0.162564	0.999982	Tmem138
ENSMUSG00000087660	84.37	-0.334535	0.239573	-1.39638	0.162601	0.999982	NA
ENSMUSG00000038366	2673.41	0.0962231	0.068925	1.39606	0.162698	0.999982	Lasp1
ENSMUSG00000076926	2.65722	-2.08441	1.49321	-1.39593	0.162735	0.999982	Traj2
ENSMUSG00000090230	2.46064	1.97547	1.41545	1.39564	0.162822	0.999982	NA
ENSMUSG00000109684	0.990692	-3.44509	2.46887	-1.39541	0.162893	NA	NA
ENSMUSG00000112481	0.990692	-3.44509	2.46887	-1.39541	0.162893	NA	Gm29684
ENSMUSG00000120839	0.990692	-3.44509	2.46887	-1.39541	0.162893	NA	NA
ENSMUSG00000027198	899.274	0.127281	0.0912185	1.39534	0.162913	0.999982	Ext2
ENSMUSG00000029361	1.50215	2.88792	2.0698	1.39527	0.162935	0.999982	Nos1
ENSMUSG00000032330	1185.45	-0.168922	0.121103	-1.39486	0.163058	0.999982	Cox7a2
ENSMUSG00000068663	478.801	0.152076	0.109065	1.39436	0.163209	0.999982	Clec16a
ENSMUSG00000090079	5.58984	-1.28012	0.918072	-1.39435	0.163211	0.999982	NA
ENSMUSG00000022440	61.8949	0.40775	0.292447	1.39427	0.163237	0.999982	C1qtnf6
ENSMUSG00000112375	3.82551	-1.51651	1.08775	-1.39417	0.163267	0.999982	NA
ENSMUSG00000087442	579.868	0.152319	0.109295	1.39365	0.163424	0.999982	NA
ENSMUSG00000071711	220.471	-0.206065	0.147863	-1.39362	0.163432	0.999982	Mpst
ENSMUSG00000079056	0.969641	3.40336	2.44234	1.39348	0.163474	NA	Kcnip3
ENSMUSG00000030533	733.68	0.140972	0.101175	1.39334	0.163516	0.999982	Unc45a
ENSMUSG00000025154	700.483	0.13157	0.0944494	1.39303	0.163612	0.999982	Arhgap19
ENSMUSG00000082465	81.5212	-0.816899	0.586449	-1.39296	0.163632	0.999982	Rps6-ps3
ENSMUSG00000041235	791.413	0.174904	0.125574	1.39283	0.16367	0.999982	Chd7
ENSMUSG00000097134	1.5314	2.92284	2.09874	1.39267	0.163721	0.999982	NA
ENSMUSG00000073676	4255.41	-0.0904047	0.0649308	-1.39232	0.163824	0.999982	Hspe1
ENSMUSG00000018209	3431.06	0.0862503	0.0619679	1.39186	0.163966	0.999982	Stk4
ENSMUSG00000091732	14.083	-0.802706	0.576728	-1.39183	0.163974	0.999982	Gm17541
ENSMUSG00000034211	602.697	-0.145606	0.104672	-1.39107	0.164204	0.999982	Mrps17
ENSMUSG00000074580	17.2097	-0.72794	0.523332	-1.39097	0.164234	0.999982	4931440P22Rik
ENSMUSG00000100514	23.4611	-0.627598	0.451263	-1.39076	0.164299	0.999982	NA
ENSMUSG00000120714	6.09954	1.25368	0.901541	1.39059	0.164349	0.999982	NA
ENSMUSG00000033111	117.923	-0.283428	0.203961	-1.38962	0.164646	0.999982	3830406C13Rik
ENSMUSG00000102824	82.4117	-0.473562	0.340854	-1.38934	0.164729	0.999982	NA
ENSMUSG00000111737	24.8095	0.611055	0.439885	1.38913	0.164795	0.999982	NA
ENSMUSG00000032066	2.95699	1.82701	1.31576	1.38856	0.164967	0.999982	Bco2
ENSMUSG00000028950	0.990388	3.42953	2.46992	1.38852	0.164979	NA	Tas1r1
ENSMUSG00000114190	1.96675	2.29696	1.65457	1.38826	0.165059	0.999982	NA
ENSMUSG00000028646	850.496	0.124935	0.0900397	1.38755	0.165274	0.999982	Rragc
ENSMUSG00000115247	37.1802	-0.484516	0.349214	-1.38745	0.165306	0.999982	NA
ENSMUSG00000058230	338.218	0.172417	0.124276	1.38738	0.165327	0.999982	Arhgap35
ENSMUSG00000050335	40.6986	0.52832	0.380809	1.38736	0.165331	0.999982	Lgals3
ENSMUSG00000120260	1.47287	2.86116	2.06255	1.3872	0.165382	0.999982	NA
ENSMUSG00000109754	205.307	-0.211927	0.152778	-1.38716	0.165393	0.999982	NA
ENSMUSG00000031447	1719.14	0.097989	0.0706429	1.3871	0.16541	0.999982	Lamp1
ENSMUSG00000120997	10.4476	-0.917415	0.661426	-1.38703	0.165434	0.999982	NA
ENSMUSG00000008384	192.284	-0.231952	0.167242	-1.38693	0.165464	0.999982	Sertad1
ENSMUSG00000045609	3.52775	-1.72237	1.24199	-1.38679	0.165507	0.999982	NA
ENSMUSG00000040043	260.914	-0.189192	0.136435	-1.38669	0.165537	0.999982	Rbms2
ENSMUSG00000031299	2575.48	0.0882813	0.0636779	1.38637	0.165633	0.999982	Pdha1
ENSMUSG00000034903	252.365	0.192244	0.138708	1.38596	0.165759	0.999982	Cobll1
ENSMUSG00000071451	301.08	-0.195867	0.141378	-1.38541	0.165926	0.999982	Psmg4
ENSMUSG00000085665	1.44775	-2.86847	2.07052	-1.38539	0.165934	0.999982	NA
ENSMUSG00000009535	784.031	-0.129719	0.0936402	-1.38529	0.165965	0.999982	Rnmt
ENSMUSG00000031986	588.302	0.141974	0.102488	1.38527	0.16597	0.999982	Sprtn
ENSMUSG00000024887	26.6691	-0.598397	0.431971	-1.38527	0.16597	0.999982	Asah2
ENSMUSG00000076920	0.96557	3.3981	2.4538	1.38483	0.166104	NA	Traj8
ENSMUSG00000028521	232.612	0.230601	0.166552	1.38456	0.166188	0.999982	Slc35d1
ENSMUSG00000026426	210.953	0.249936	0.180537	1.3844	0.166236	0.999982	Arl8a
ENSMUSG00000033543	562.067	-0.142255	0.102764	-1.38429	0.166269	0.999982	Gtf2a2
ENSMUSG00000040852	2.9972	-1.81836	1.31397	-1.38386	0.166401	0.999982	Plekhh2
ENSMUSG00000035299	31.1374	0.557468	0.402981	1.38336	0.166554	0.999982	Mid1
ENSMUSG00000036057	511.867	0.156804	0.113425	1.38244	0.166837	0.999982	Ptpn23
ENSMUSG00000062380	3.42649	1.66845	1.20712	1.38218	0.166916	0.999982	Tubb3
ENSMUSG00000120437	8.20515	-1.08723	0.786834	-1.38177	0.167041	0.999982	NA
ENSMUSG00000063882	1087.02	-0.139489	0.100949	-1.38177	0.167041	0.999982	Uqcrh
ENSMUSG00000027737	4.26428	-1.44809	1.04822	-1.38148	0.167131	0.999982	Slc7a11
ENSMUSG00000033623	362.821	0.169678	0.122825	1.38146	0.167136	0.999982	Pcgf3
ENSMUSG00000086331	4.75381	-1.40642	1.01902	-1.38017	0.167535	0.999982	NA
ENSMUSG00000056899	27.4628	0.567812	0.411464	1.37998	0.167592	0.999982	Immp2l
ENSMUSG00000031165	1205.55	0.106652	0.0773376	1.37904	0.167882	0.999982	Was
ENSMUSG00000040586	211.408	0.212445	0.154093	1.37868	0.167994	0.999982	Ofd1
ENSMUSG00000038970	649.291	0.140214	0.101711	1.37854	0.168035	0.999982	Lmtk2
ENSMUSG00000094468	7.76354	1.06543	0.773461	1.37748	0.168363	0.999982	Trav6-4
ENSMUSG00000042744	426.307	0.177459	0.12884	1.37737	0.168399	0.999982	Hectd4
ENSMUSG00000073412	2.97853	-1.7961	1.30411	-1.37726	0.168432	0.999982	Lst1
ENSMUSG00000120113	37.9508	-0.482931	0.350704	-1.37703	0.168502	0.999982	Fam120aos
ENSMUSG00000027286	153.693	0.258546	0.187756	1.37703	0.168503	0.999982	Lrrc57
ENSMUSG00000048351	307.1	-0.199555	0.144925	-1.37695	0.168526	0.999982	Coa7
ENSMUSG00000085669	2.48216	1.98734	1.44333	1.37691	0.16854	0.999982	NA
ENSMUSG00000100182	3.51422	1.65704	1.20348	1.37688	0.168549	0.999982	1810006J02Rik
ENSMUSG00000114138	143.033	0.26238	0.19062	1.37646	0.168679	0.999982	NA
ENSMUSG00000022453	72.926	0.383527	0.27875	1.37588	0.168858	0.999982	Naga
ENSMUSG00000039523	404.726	0.16479	0.119784	1.37573	0.168906	0.999982	Cep104
ENSMUSG00000055839	1303.91	-0.143305	0.104193	-1.37537	0.169016	0.999982	Elob
ENSMUSG00000020918	945.913	0.123886	0.0900758	1.37535	0.169022	0.999982	Kat2a
ENSMUSG00000057110	958.078	0.139695	0.1016	1.37495	0.169146	0.999982	Cntrl
ENSMUSG00000081382	32.2676	-0.619818	0.45082	-1.37487	0.169172	0.999982	Rpl18-ps1
ENSMUSG00000007097	4.32295	1.45262	1.0568	1.37454	0.169275	0.999982	Atp1a2
ENSMUSG00000109128	26.2159	0.595512	0.433315	1.37432	0.169343	0.999982	NA
ENSMUSG00000048592	2.68565	-2.11583	1.53958	-1.37429	0.169352	0.999982	NA
ENSMUSG00000115231	5.9488	1.42338	1.03576	1.37424	0.169368	0.999982	NA
ENSMUSG00000032498	373.361	-0.162161	0.118006	-1.37417	0.169389	0.999982	Mlh1
ENSMUSG00000070639	159.542	0.239983	0.174656	1.37403	0.169432	0.999982	Lrrc8b
ENSMUSG00000121445	11.408	-0.896471	0.652466	-1.37397	0.16945	0.999982	NA
ENSMUSG00000074743	17.281	-0.78154	0.568886	-1.37381	0.169502	0.999982	Thbd
ENSMUSG00000040167	541.384	0.146912	0.10695	1.37365	0.16955	0.999982	Ikzf5
ENSMUSG00000021540	250.033	0.192713	0.140309	1.37349	0.169599	0.999982	Smad5
ENSMUSG00000047649	452.852	-0.166403	0.121248	-1.37243	0.16993	0.999982	Polr1g
ENSMUSG00000038909	1103.1	0.108576	0.0791657	1.3715	0.17022	0.999982	Kat7
ENSMUSG00000027427	463.245	0.163009	0.11886	1.37144	0.170238	0.999982	Polr3f
ENSMUSG00000040945	7588.05	-0.102493	0.0747357	-1.37141	0.170246	0.999982	Rcc2
ENSMUSG00000028453	171.832	0.224614	0.16392	1.37026	0.170604	0.999982	Fancg
ENSMUSG00000001988	17.0269	-0.713774	0.521003	-1.37	0.170687	0.999982	Npas1
ENSMUSG00000046807	1.3575	-2.73525	1.99697	-1.3697	0.170781	0.999982	Lrrc75b
ENSMUSG00000062825	25985.4	0.0721342	0.0526804	1.36928	0.170912	0.999982	Actg1
ENSMUSG00000089883	2.03056	2.31711	1.69236	1.36916	0.17095	0.999982	NA
ENSMUSG00000038037	585.991	-0.152481	0.111402	-1.36874	0.171079	0.999982	Socs1
ENSMUSG00000056481	11.624	-0.85372	0.623911	-1.36834	0.171207	0.999982	Cd248
ENSMUSG00000040877	60.4905	0.373105	0.272711	1.36814	0.17127	0.999982	Wdr25
ENSMUSG00000015943	133.654	-0.259122	0.189424	-1.36795	0.171328	0.999982	Bola1
ENSMUSG00000054091	874.07	-0.145951	0.106701	-1.36785	0.171359	0.999982	1810037I17Rik
ENSMUSG00000048617	8.79135	-0.973997	0.712231	-1.36753	0.171459	0.999982	Rtbdn
ENSMUSG00000120857	9.97387	-0.902344	0.659997	-1.3672	0.171564	0.999982	NA
ENSMUSG00000061136	2844.09	0.104828	0.0766774	1.36713	0.171585	0.999982	Prpf40a
ENSMUSG00000007892	22018	-0.123158	0.0901027	-1.36687	0.171667	0.999982	Rplp1
ENSMUSG00000024260	651.664	0.151458	0.110816	1.36675	0.171703	0.999982	Sap130
ENSMUSG00000024378	1774.68	-0.111627	0.0816782	-1.36667	0.17173	0.999982	Stard4
ENSMUSG00000104448	29.3278	-0.598398	0.437868	-1.36662	0.171746	0.999982	NA
ENSMUSG00000108199	1.34489	-2.73529	2.00171	-1.36647	0.17179	NA	NA
ENSMUSG00000084950	1035.71	0.11125	0.0814145	1.36646	0.171794	0.999982	Gm5577
ENSMUSG00000096948	7.65629	-1.0776	0.788633	-1.36641	0.171811	0.999982	Gm4221
ENSMUSG00000020865	18.3543	-0.67578	0.494752	-1.3659	0.171972	0.999982	Abcc3
ENSMUSG00000037202	33.0938	0.506036	0.370685	1.36514	0.172209	0.999982	Prf1
ENSMUSG00000084276	1.97121	2.29978	1.68522	1.36468	0.172355	0.999982	Gm8317
[truncated: 17,131 more rows]

## Sheet: p0.05 downregulated (DN, 600)
ems	baseMean	log2FoldChange	lfcSE	stat	pvalue	padj	SYMBOL
ENSMUSG00000015812	2.13177	-4.55197	1.82447	-2.49495	0.0125973	0.965426	Gnrh1
ENSMUSG00000065273	1.97369	-4.44048	1.81135	-2.45148	0.014227	0.999982	Gm25128
ENSMUSG00000078967	1.83388	-4.33128	1.84702	-2.34501	0.0190263	0.999982	Gapdh-ps16
ENSMUSG00000094910	1.80708	-4.31345	1.86867	-2.30831	0.020982	0.999982	D430019H16Rik
ENSMUSG00000108042	1.78881	-4.30112	1.89082	-2.27474	0.0229218	0.999982	NA
ENSMUSG00000032584	1.51935	-4.05674	1.99317	-2.03532	0.0418185	0.999982	Mst1r
ENSMUSG00000085596	1.50108	-4.04209	1.9933	-2.02784	0.0425762	0.999982	Gm11476
ENSMUSG00000106123	1.47346	-4.01989	1.98634	-2.02377	0.0429936	0.999982	NA
ENSMUSG00000054822	1.46453	-4.01229	2.02487	-1.9815	0.047535	0.999982	NA
ENSMUSG00000110647	2.8403	-3.91017	1.61888	-2.41536	0.0157198	0.999982	NA
ENSMUSG00000080868	2.70008	-3.82978	1.66736	-2.29691	0.021624	0.999982	NA
ENSMUSG00000109610	2.1552	-3.48449	1.74584	-1.99588	0.0459466	0.999982	Gm7432
ENSMUSG00000112146	2.14667	-3.48449	1.74735	-1.99416	0.0461349	0.999982	NA
ENSMUSG00000063531	2.15438	-3.48423	1.74595	-1.99561	0.0459768	0.999982	Sema3e
ENSMUSG00000056025	2.1284	-3.47362	1.75908	-1.97468	0.0483044	0.999982	Clca3a1
ENSMUSG00000048794	3.9995	-3.47221	1.3796	-2.51683	0.0118417	0.931751	Cfap100
ENSMUSG00000040026	175.839	-3.21993	0.760308	-4.23503	2.28517e-05	0.00891216	Saa3
ENSMUSG00000029380	44.453	-3.17409	0.513078	-6.18637	6.15672e-10	4.0908e-07	Cxcl1
ENSMUSG00000102900	3.18475	-3.10739	1.44948	-2.14379	0.0320495	0.999982	NA
ENSMUSG00000026822	9.12532	-3.0369	0.935989	-3.24459	0.0011762	0.24254	Lcn2
ENSMUSG00000039217	2.83286	-2.91924	1.48721	-1.96289	0.0496585	0.999982	Il18
ENSMUSG00000025746	5.04283	-2.7595	1.21221	-2.27642	0.0228207	0.999982	Il6
ENSMUSG00000050914	55.3039	-2.75676	0.350331	-7.869	3.57477e-15	4.27542e-12	Ankrd37
ENSMUSG00000031637	40.8822	-2.65012	0.417865	-6.34206	2.26719e-10	1.69473e-07	Lrp2bp
ENSMUSG00000093467	3.48372	-2.60052	1.29838	-2.0029	0.045188	0.999982	NA
ENSMUSG00000050578	3.46952	-2.58899	1.27501	-2.03056	0.0422994	0.999982	Mmp13
ENSMUSG00000032531	17.4718	-2.49666	0.585793	-4.26202	2.02586e-05	0.00826	Amotl2
ENSMUSG00000044258	6.14786	-2.35886	0.984719	-2.39546	0.0165993	0.999982	Ctla2a
ENSMUSG00000117779	7.98023	-2.34669	0.832377	-2.81927	0.00481337	0.630305	NA
ENSMUSG00000025161	575.171	-2.34005	0.122997	-19.0253	1.0531e-80	9.44631e-77	Slc16a3
ENSMUSG00000082179	5.78903	-2.27862	0.964617	-2.3622	0.0181666	0.999982	NA
ENSMUSG00000060594	4.8143	-2.26797	1.051	-2.15791	0.0309348	0.999982	Layn
ENSMUSG00000031778	6.68133	-2.26141	0.978275	-2.31163	0.0207981	0.999982	Cx3cl1
ENSMUSG00000082662	5.14656	-2.08119	0.996466	-2.08857	0.036746	0.999982	NA
ENSMUSG00000052353	29.2408	-2.01474	0.430639	-4.67848	2.89006e-06	0.00136441	Cemip
ENSMUSG00000078566	137.691	-1.96802	0.211557	-9.30259	1.37071e-20	2.23551e-17	Bnip3
ENSMUSG00000032487	40.9183	-1.95016	0.453155	-4.30352	1.68106e-05	0.00718051	Ptgs2
ENSMUSG00000000056	151.059	-1.92566	0.195087	-9.87076	5.57395e-23	1.11107e-19	Narf
ENSMUSG00000028527	272.545	-1.91268	0.152182	-12.5684	3.15168e-36	1.13082e-32	Ak4
ENSMUSG00000059994	9.36944	-1.90269	0.737136	-2.58118	0.00984619	0.853336	Fcrl1
ENSMUSG00000109881	92.4911	-1.79179	0.257636	-6.95474	3.53221e-12	3.16839e-09	NA
ENSMUSG00000020303	63.2187	-1.79157	0.297966	-6.01267	1.82492e-09	1.16925e-06	Stc2
ENSMUSG00000108934	7.16361	-1.75011	0.83403	-2.09838	0.0358719	0.999982	NA
ENSMUSG00000045312	7.10149	-1.72416	0.832747	-2.07045	0.0384104	0.999982	Lhfpl2
ENSMUSG00000019846	7.06089	-1.71855	0.838756	-2.04893	0.0404689	0.999982	Lama4
ENSMUSG00000034205	17.4601	-1.71068	0.562338	-3.04209	0.00234941	0.383168	Loxl2
ENSMUSG00000019929	94.2424	-1.67256	0.298727	-5.59895	2.1565e-08	1.17235e-05	Dcn
ENSMUSG00000026043	159.384	-1.65977	0.490439	-3.38425	0.000713725	0.168477	Col3a1
ENSMUSG00000027750	133.192	-1.65444	0.648176	-2.55245	0.0106969	0.896739	Postn
ENSMUSG00000115431	11.6659	-1.62212	0.728521	-2.22659	0.0259747	0.999982	NA
ENSMUSG00000097989	9.22007	-1.58632	0.76028	-2.08649	0.0369342	0.999982	Gm4335
ENSMUSG00000030623	10.2882	-1.52899	0.696211	-2.19616	0.0280804	0.999982	NA
ENSMUSG00000038451	24.2891	-1.43405	0.450468	-3.18347	0.00145522	0.28088	Spsb2
ENSMUSG00000037440	37.1212	-1.42937	0.369431	-3.8691	0.000109238	0.0343812	Vnn1
ENSMUSG00000056427	18.0942	-1.40928	0.519805	-2.71117	0.00670472	0.737931	Slit3
ENSMUSG00000023456	5961.57	-1.4062	0.0708596	-19.8449	1.22088e-87	2.19027e-83	Tpi1
ENSMUSG00000120507	13.7808	-1.39587	0.577743	-2.41608	0.0156887	0.999982	NA
ENSMUSG00000023951	47.2931	-1.36623	0.338409	-4.03724	5.40849e-05	0.0186593	Vegfa
ENSMUSG00000004098	12.4394	-1.36566	0.692494	-1.97208	0.0485999	0.999982	Col5a3
ENSMUSG00000033316	14.1618	-1.36527	0.572803	-2.3835	0.0171491	0.999982	Galnt9
ENSMUSG00000069008	12.3023	-1.33732	0.619645	-2.1582	0.0309121	0.999982	NA
ENSMUSG00000038235	13.2867	-1.31418	0.603637	-2.1771	0.0294733	0.999982	F11r
ENSMUSG00000032332	103.504	-1.28171	0.511355	-2.50649	0.0121935	0.942893	Col12a1
ENSMUSG00000040152	233.712	-1.27683	0.386093	-3.30705	0.000942851	0.205297	Thbs1
ENSMUSG00000082066	23.9628	-1.24985	0.443106	-2.82067	0.0047924	0.630305	NA
ENSMUSG00000020826	14.1962	-1.21783	0.581858	-2.093	0.0363495	0.999982	Nos2
ENSMUSG00000074280	22.698	-1.21094	0.503664	-2.40426	0.0162054	0.999982	NA
ENSMUSG00000020277	2078.3	-1.20627	0.0712222	-16.9367	2.41463e-64	1.44395e-60	Pfkl
ENSMUSG00000081629	16.0215	-1.20191	0.59738	-2.01197	0.0442236	0.999982	NA
ENSMUSG00000049233	13.1792	-1.19753	0.61016	-1.96265	0.049687	0.999982	Apoo-ps
ENSMUSG00000056836	16.2571	-1.17764	0.581439	-2.02539	0.0428275	0.999982	Pin4-ps
ENSMUSG00000072941	19.8847	-1.16213	0.557526	-2.08443	0.0371207	0.999982	Sod3
ENSMUSG00000022639	67.3672	-1.0956	0.268218	-4.08473	4.41283e-05	0.0155228	NA
ENSMUSG00000015568	36.1033	-1.08958	0.395121	-2.75758	0.00582318	0.682797	Lpl
ENSMUSG00000044330	54.9411	-1.08322	0.399949	-2.70839	0.00676109	0.739597	NA
ENSMUSG00000091269	28.6242	-1.04793	0.465426	-2.25156	0.02435	0.999982	Gm6682
ENSMUSG00000022816	69.8998	-1.0218	0.347106	-2.94377	0.00324239	0.479335	Fstl1
ENSMUSG00000006378	23.898	-0.994066	0.455522	-2.18226	0.0290906	0.999982	Gcat
ENSMUSG00000073421	24.4843	-0.974341	0.471791	-2.0652	0.0389043	0.999982	H2-Ab1
ENSMUSG00000081640	20.0806	-0.969341	0.487815	-1.98711	0.0469104	0.999982	Rplp0-ps1
ENSMUSG00000110545	55.1139	-0.959068	0.381589	-2.51335	0.011959	0.932802	NA
ENSMUSG00000018906	33.8259	-0.951147	0.386298	-2.46221	0.0138083	0.990883	P4ha2
ENSMUSG00000019916	832.198	-0.932833	0.0868882	-10.736	6.8954e-27	1.76719e-23	P4ha1
ENSMUSG00000029810	42.4957	-0.925302	0.340152	-2.72026	0.00652305	0.731064	Tmem176b
ENSMUSG00000001506	540.31	-0.921597	0.318446	-2.89404	0.00380316	0.540527	Col1a1
ENSMUSG00000022665	37.2928	-0.9205	0.353154	-2.60652	0.00914688	0.821649	Ccdc80
ENSMUSG00000095288	26.4898	-0.917997	0.464684	-1.97553	0.0482079	0.999982	NA
ENSMUSG00000038521	66.6791	-0.913304	0.291586	-3.1322	0.00173504	0.324236	C1s1
ENSMUSG00000023885	123.874	-0.911187	0.290347	-3.13827	0.00169949	0.320936	Thbs2
ENSMUSG00000026042	88.2624	-0.897285	0.252927	-3.5476	0.000388759	0.0996333	Col5a2
ENSMUSG00000028364	49.9153	-0.894237	0.317856	-2.81335	0.0049029	0.632927	Tnc
ENSMUSG00000035637	255.439	-0.88322	0.147191	-6.00051	1.96694e-09	1.21679e-06	Grhpr
ENSMUSG00000029371	83.1248	-0.870921	0.306318	-2.8432	0.00446634	0.611102	Cxcl5
ENSMUSG00000087700	804.052	-0.842662	0.103213	-8.16431	3.23287e-16	4.14269e-13	NA
ENSMUSG00000083836	50.1141	-0.839106	0.339763	-2.46968	0.0135233	0.986215	NA
ENSMUSG00000117972	28.4881	-0.825234	0.404049	-2.04241	0.0411105	0.999982	Gm6813
ENSMUSG00000031502	49.7165	-0.809771	0.309081	-2.61993	0.00879475	0.813287	Col4a1
ENSMUSG00000053470	494.319	-0.808962	0.113558	-7.12375	1.05033e-12	9.91728e-10	Kdm3a
ENSMUSG00000058966	2135.47	-0.804589	0.0761976	-10.5592	4.60381e-26	1.03241e-22	Tlcd3b
ENSMUSG00000031958	31.0964	-0.790509	0.378766	-2.08707	0.0368822	0.999982	Ldhd
ENSMUSG00000023367	33.7301	-0.787083	0.36505	-2.1561	0.0310761	0.999982	Tmem176a
ENSMUSG00000085505	242.531	-0.77629	0.14676	-5.2895	1.22648e-07	6.2866e-05	NA
ENSMUSG00000030695	11630.3	-0.76477	0.0607465	-12.5895	2.41092e-36	1.0813e-32	Aldoa
ENSMUSG00000031503	51.6952	-0.762205	0.315946	-2.41245	0.0158456	0.999982	Col4a2
ENSMUSG00000086862	60.0911	-0.739181	0.27851	-2.65406	0.00795301	0.799817	Gm13546
ENSMUSG00000031438	41.366	-0.728957	0.349025	-2.08855	0.0367482	0.999982	Rnf128
ENSMUSG00000100865	62.6361	-0.726939	0.35828	-2.02897	0.0424616	0.999982	Gm9320
ENSMUSG00000112546	43.8661	-0.723555	0.332029	-2.17919	0.0293176	0.999982	NA
ENSMUSG00000029661	335.787	-0.718815	0.180883	-3.97392	7.06992e-05	0.0234878	Col1a2
ENSMUSG00000022885	537.236	-0.709197	0.317557	-2.23329	0.0255296	0.999982	St6gal1
ENSMUSG00000051149	107.818	-0.699592	0.248711	-2.81287	0.00491022	0.632927	Adnp
ENSMUSG00000006494	1015.78	-0.684629	0.0935939	-7.31489	2.57591e-13	2.71834e-10	Pdk1
ENSMUSG00000059040	117.13	-0.673887	0.264408	-2.54867	0.0108136	0.898102	Eno1b
ENSMUSG00000097048	38.5712	-0.673515	0.340803	-1.97626	0.0481253	0.999982	1600020E01Rik
ENSMUSG00000063953	66.2378	-0.671613	0.338497	-1.9841	0.0472445	0.999982	Amd2
ENSMUSG00000108366	108.287	-0.664858	0.290509	-2.2886	0.0221025	0.999982	Gm5586
ENSMUSG00000028167	56.7274	-0.663944	0.335644	-1.97812	0.0479151	0.999982	Bdh2
ENSMUSG00000026837	60.3858	-0.658832	0.329314	-2.00062	0.0454337	0.999982	Col5a1
ENSMUSG00000028645	1413.69	-0.651946	0.0738888	-8.82334	1.11096e-18	1.66089e-15	Slc2a1
ENSMUSG00000049235	82.1609	-0.639968	0.32221	-1.98618	0.0470132	0.999982	Gm7324
ENSMUSG00000046058	84.7908	-0.632735	0.243744	-2.5959	0.00943444	0.83789	Eid2
ENSMUSG00000104699	86.4132	-0.629873	0.317392	-1.98452	0.0471974	0.999982	Rps4x-ps
ENSMUSG00000024940	51.7454	-0.626845	0.299984	-2.0896	0.036654	0.999982	Ltbp3
ENSMUSG00000025584	138.985	-0.625476	0.221007	-2.83012	0.0046531	0.619827	Pde8a
ENSMUSG00000120390	49.0386	-0.613463	0.306542	-2.00124	0.045367	0.999982	NA
ENSMUSG00000063524	18464.3	-0.608511	0.06246	-9.74241	1.98779e-22	3.56609e-19	Eno1
ENSMUSG00000024164	672.365	-0.60419	0.2852	-2.11848	0.0341344	0.999982	C3
ENSMUSG00000075591	69.5344	-0.603721	0.286715	-2.10565	0.0352351	0.999982	Gm10874
ENSMUSG00000076824	63.6316	-0.601986	0.271839	-2.21449	0.026795	0.999982	Trav14n-3
ENSMUSG00000073236	88.6679	-0.59964	0.242447	-2.47329	0.0133877	0.982108	2500004C02Rik
ENSMUSG00000029394	1396.39	-0.597988	0.0933968	-6.40266	1.52693e-10	1.19101e-07	Cdk2ap1
ENSMUSG00000018593	280.913	-0.590092	0.198136	-2.97822	0.00289924	0.452282	Sparc
ENSMUSG00000056671	222.716	-0.589314	0.157245	-3.74774	0.000178437	0.050812	Prelid2
ENSMUSG00000101970	87.2659	-0.588794	0.237571	-2.47839	0.0131975	0.982064	Chaserr
ENSMUSG00000026989	162.717	-0.579609	0.201706	-2.87353	0.00405915	0.564505	Dapl1
ENSMUSG00000104605	295.076	-0.579442	0.139198	-4.16272	3.14482e-05	0.0117538	NA
ENSMUSG00000082193	70.0506	-0.568562	0.285927	-1.98849	0.0467578	0.999982	Rpl5-ps1
ENSMUSG00000032294	21654.6	-0.567572	0.0527417	-10.7614	5.23884e-27	1.56641e-23	Pkm
ENSMUSG00000035678	66.3654	-0.565631	0.284909	-1.9853	0.0471106	0.999982	Tnfsf9
ENSMUSG00000032114	147.2	-0.561025	0.182167	-3.07972	0.00207195	0.363996	Slc37a4
ENSMUSG00000031983	94.5934	-0.55794	0.235628	-2.36789	0.0178899	0.999982	2310022B05Rik
ENSMUSG00000104913	239.062	-0.54403	0.176796	-3.07716	0.00208983	0.363996	NA
ENSMUSG00000081400	189.664	-0.538893	0.229489	-2.34823	0.0188626	0.999982	Gm13680
ENSMUSG00000005447	85.4737	-0.535865	0.235237	-2.27798	0.022728	0.999982	Pafah1b3
ENSMUSG00000024529	135.988	-0.529834	0.221114	-2.3962	0.0165661	0.999982	Lox
ENSMUSG00000057359	127.37	-0.528062	0.202429	-2.60863	0.0090906	0.821649	NA
ENSMUSG00000053929	150.68	-0.513761	0.195809	-2.62379	0.00869586	0.810599	Zftraf1
ENSMUSG00000003824	164.192	-0.511592	0.176891	-2.89212	0.00382647	0.540527	Syce2
ENSMUSG00000025791	732.165	-0.510733	0.0921227	-5.54406	2.95543e-08	1.55942e-05	Pgm1
ENSMUSG00000068262	96.8977	-0.50671	0.245381	-2.06499	0.0389238	0.999982	NA
ENSMUSG00000078779	86.5941	-0.50471	0.235056	-2.14719	0.0317782	0.999982	Zfp59
ENSMUSG00000070394	163.043	-0.496916	0.192221	-2.58513	0.00973418	0.85186	Tmem256
ENSMUSG00000024038	387.299	-0.48847	0.153625	-3.17963	0.00147463	0.281434	Ndufv3
ENSMUSG00000121129	82.3993	-0.485648	0.240015	-2.02341	0.0430308	0.999982	NA
ENSMUSG00000031987	1248.46	-0.475927	0.0804813	-5.91351	3.34895e-09	2.00267e-06	Egln1
ENSMUSG00000064023	134.969	-0.475612	0.193668	-2.45582	0.0140565	0.999982	Klk8
ENSMUSG00000033307	5458.47	-0.472559	0.0730354	-6.47028	9.78246e-11	7.97715e-08	Mif
ENSMUSG00000026199	104.906	-0.471469	0.218092	-2.16179	0.030634	0.999982	Ankzf1
ENSMUSG00000097750	172.073	-0.469721	0.188486	-2.49207	0.0127001	0.965426	NA
ENSMUSG00000024201	263.339	-0.464966	0.156861	-2.96419	0.00303484	0.468088	Kdm4b
ENSMUSG00000001119	109.014	-0.459198	0.212761	-2.15828	0.0309064	0.999982	Col6a1
ENSMUSG00000037280	1114.71	-0.453319	0.0807548	-5.61352	1.98251e-08	1.11144e-05	Galnt6
ENSMUSG00000076463	173.162	-0.446478	0.204955	-2.17842	0.0293749	0.999982	Trbv3
ENSMUSG00000064193	152.097	-0.437815	0.207593	-2.10901	0.0349439	0.999982	NA
ENSMUSG00000062070	12769.7	-0.435485	0.0581094	-7.49422	6.66929e-14	7.47794e-11	Pgk1
ENSMUSG00000028549	307.082	-0.428938	0.134746	-3.1833	0.00145607	0.28088	Itgb3bp
ENSMUSG00000030990	138.061	-0.424269	0.193213	-2.19587	0.0281016	0.999982	Pgap2
ENSMUSG00000063229	26513.1	-0.419477	0.0579463	-7.23907	4.51773e-13	4.50267e-10	Ldha
ENSMUSG00000006014	134.798	-0.418327	0.19755	-2.11758	0.034211	0.999982	Prg4
ENSMUSG00000090062	357.192	-0.417304	0.126892	-3.28865	0.00100668	0.212468	NA
ENSMUSG00000011752	3206.61	-0.416833	0.0640667	-6.50623	7.70599e-11	6.58311e-08	Pgam1
ENSMUSG00000102070	158.675	-0.414775	0.179075	-2.3162	0.0205471	0.999982	NA
ENSMUSG00000079942	158.638	-0.412687	0.184531	-2.23641	0.025325	0.999982	Rpl28-ps3
ENSMUSG00000022051	602.592	-0.412618	0.10702	-3.85551	0.000115488	0.0357216	Bnip3l
ENSMUSG00000040249	218.606	-0.405285	0.15383	-2.63463	0.00842298	0.810599	Lrp1
ENSMUSG00000022217	290.804	-0.401484	0.180498	-2.22432	0.0261273	0.999982	Emc9
ENSMUSG00000118051	186.092	-0.40072	0.179543	-2.23189	0.0256219	0.999982	Gm8714
ENSMUSG00000003955	1035.72	-0.391906	0.0880291	-4.45201	8.50702e-06	0.00377427	Fam162a
ENSMUSG00000024892	214.669	-0.391569	0.148697	-2.63333	0.00845524	0.810599	Pcx
ENSMUSG00000032673	138.693	-0.389605	0.187987	-2.07251	0.0382181	0.999982	Prorsd1
ENSMUSG00000036427	6392.53	-0.380948	0.0609055	-6.25474	3.98172e-10	2.85728e-07	Gpi1
ENSMUSG00000003153	409.686	-0.380348	0.127023	-2.99431	0.00275066	0.436698	Slc2a3
ENSMUSG00000004936	818.927	-0.379701	0.0886286	-4.28418	1.83414e-05	0.00765222	Map2k1
ENSMUSG00000004885	324.984	-0.378872	0.137126	-2.76294	0.00572829	0.682797	Crabp2
ENSMUSG00000022906	588.536	-0.371534	0.103328	-3.59568	0.000323548	0.0853595	Parp9
ENSMUSG00000038412	586.453	-0.370772	0.0986354	-3.75901	0.000170586	0.0493598	Higd1a
ENSMUSG00000074129	397.683	-0.368626	0.169878	-2.16994	0.0300112	0.999982	Rpl13a
ENSMUSG00000035674	517.807	-0.366911	0.160176	-2.29067	0.0219823	0.999982	Ndufa3
ENSMUSG00000059534	1155.51	-0.365113	0.113305	-3.22239	0.00127124	0.253992	Uqcr10
ENSMUSG00000000628	1552.31	-0.362655	0.0770717	-4.70543	2.53331e-06	0.00122831	Hk2
ENSMUSG00000031634	307.634	-0.355688	0.136849	-2.59913	0.00934617	0.834181	Ufsp2
ENSMUSG00000040128	857.497	-0.352392	0.0947618	-3.71871	0.00020024	0.0552661	Pnrc1
ENSMUSG00000001348	162.298	-0.348624	0.169237	-2.05998	0.0394005	0.999982	Acp5
ENSMUSG00000006360	280.815	-0.345315	0.158634	-2.17681	0.029495	0.999982	Crip1
ENSMUSG00000091367	397.204	-0.34508	0.135308	-2.55033	0.0107622	0.898019	NA
ENSMUSG00000049878	400.172	-0.343814	0.127579	-2.69492	0.00704063	0.756015	Rlf
ENSMUSG00000021485	598.208	-0.339952	0.127812	-2.65977	0.0078194	0.799817	Mxd3
ENSMUSG00000030615	445.188	-0.338913	0.131032	-2.5865	0.00969574	0.85186	Tmem126a
ENSMUSG00000054871	399.082	-0.331608	0.156963	-2.11266	0.0346302	0.999982	Tmem158
ENSMUSG00000036168	297.743	-0.329341	0.137642	-2.39273	0.0167236	0.999982	Ccdc38
ENSMUSG00000014294	420.901	-0.324754	0.12968	-2.50426	0.0122708	0.944796	Ndufa2
ENSMUSG00000038256	406.588	-0.323414	0.121015	-2.67252	0.00752844	0.789826	Bcl9
ENSMUSG00000028024	208.492	-0.322608	0.162439	-1.98602	0.0470306	0.999982	Enpep
ENSMUSG00000021290	634.464	-0.321086	0.125265	-2.56326	0.0103695	0.873378	Atp5mpl
ENSMUSG00000045996	239.579	-0.320724	0.152683	-2.10058	0.0356778	0.999982	Polr2k
ENSMUSG00000034993	246.124	-0.318144	0.148089	-2.14833	0.0316875	0.999982	Vat1
ENSMUSG00000016252	1074.36	-0.31771	0.0962284	-3.30163	0.000961255	0.205297	Atp5e
ENSMUSG00000004931	212.191	-0.316815	0.151734	-2.08797	0.0368006	0.999982	Apba3
ENSMUSG00000034932	365.811	-0.314842	0.11902	-2.64528	0.00816225	0.80901	Mrpl54
ENSMUSG00000061111	351.862	-0.30988	0.133603	-2.3194	0.0203731	0.999982	Mcrip1
ENSMUSG00000068184	249.196	-0.301367	0.143686	-2.0974	0.0359579	0.999982	Ndufaf2
ENSMUSG00000038690	1210.63	-0.298344	0.106136	-2.81097	0.00493923	0.632927	Atp5j2
ENSMUSG00000039294	378.886	-0.294748	0.132023	-2.23255	0.0255784	0.999982	Cybc1
ENSMUSG00000019158	283.251	-0.290939	0.140339	-2.07311	0.0381617	0.999982	Tmem160
ENSMUSG00000057666	36112.8	-0.290589	0.0500969	-5.80054	6.61016e-09	3.82536e-06	Gapdh
ENSMUSG00000098234	513.128	-0.290497	0.138352	-2.09969	0.0357559	0.999982	Snhg6
ENSMUSG00000026773	866.336	-0.286233	0.0866818	-3.30211	0.000959589	0.205297	Pfkfb3
ENSMUSG00000096210	404.478	-0.279921	0.126245	-2.21727	0.0266044	0.999982	H1f0
ENSMUSG00000090553	1450.53	-0.279412	0.0867275	-3.22173	0.00127421	0.253992	Snrpe
ENSMUSG00000029725	247.259	-0.279321	0.14009	-1.99387	0.0461666	0.999982	Ppp1r35
ENSMUSG00000071722	484.373	-0.278507	0.119166	-2.33713	0.0194325	0.999982	Spin4
ENSMUSG00000021958	269.759	-0.27848	0.136816	-2.03543	0.0418073	0.999982	Pinx1
ENSMUSG00000030718	746.927	-0.273906	0.0895623	-3.05828	0.00222613	0.376761	Ppme1
ENSMUSG00000032011	2414.54	-0.27325	0.10749	-2.5421	0.0110189	0.906783	Thy1
ENSMUSG00000021196	3993.68	-0.272177	0.0770951	-3.5304	0.000414931	0.104843	Pfkp
ENSMUSG00000028840	361.787	-0.271941	0.121109	-2.24542	0.0247413	0.999982	Zfp593
ENSMUSG00000090733	3515.74	-0.271252	0.0697344	-3.88979	0.000100333	0.0321423	Rps27
ENSMUSG00000025555	364.645	-0.271008	0.137977	-1.96416	0.049512	0.999982	Farp1
ENSMUSG00000039568	631.558	-0.268951	0.102542	-2.62282	0.00872049	0.810599	Ubald1
ENSMUSG00000021607	599.589	-0.268065	0.112022	-2.39297	0.0167127	0.999982	Mrpl36
ENSMUSG00000037012	3161.78	-0.267534	0.066488	-4.0238	5.72673e-05	0.0193844	Hk1
ENSMUSG00000040253	528.939	-0.266692	0.11981	-2.22596	0.0260168	0.999982	Gbp7
ENSMUSG00000000594	412.095	-0.265659	0.116229	-2.28564	0.0222751	0.999982	Gm2a
ENSMUSG00000056612	2547.59	-0.265027	0.0906081	-2.92498	0.00344478	0.494395	Ppp1r14b
ENSMUSG00000037211	1305.01	-0.264381	0.0987518	-2.67722	0.0074235	0.788033	Spry1
ENSMUSG00000024414	371.313	-0.26129	0.123832	-2.11004	0.0348551	0.999982	Mrpl27
ENSMUSG00000036751	1201.64	-0.260158	0.102778	-2.53125	0.0113657	0.921784	Cox6b1
ENSMUSG00000049760	510.734	-0.260025	0.10748	-2.41929	0.0155507	0.999982	Micos13
ENSMUSG00000078922	760.203	-0.259911	0.120844	-2.1508	0.0314917	0.999982	Tgtp1
ENSMUSG00000020766	1640.85	-0.258482	0.0811434	-3.1855	0.00144505	0.28088	Galk1
ENSMUSG00000014313	1086.56	-0.253936	0.0990333	-2.56415	0.010343	0.873378	Cox6c
ENSMUSG00000015806	997.552	-0.253245	0.100299	-2.52491	0.0115728	0.925268	Qdpr
ENSMUSG00000044876	329.865	-0.251379	0.125134	-2.00889	0.0445492	0.999982	Zfp444
ENSMUSG00000019189	1819.5	-0.250389	0.0811184	-3.08672	0.0020238	0.363069	Rnf145
ENSMUSG00000024401	589.648	-0.248408	0.11165	-2.22488	0.0260893	0.999982	Tnf
ENSMUSG00000021486	4939.53	-0.247215	0.0694129	-3.56151	0.000368725	0.0958684	Prelid1
ENSMUSG00000091623	3295.23	-0.246218	0.0718132	-3.42859	0.000606736	0.147092	NA
ENSMUSG00000057322	1794.31	-0.24552	0.0828794	-2.96238	0.00305275	0.468088	Rpl38
ENSMUSG00000053317	836.842	-0.241032	0.11111	-2.16931	0.0300594	0.999982	Sec61b
ENSMUSG00000027133	1280.68	-0.240182	0.0867392	-2.76901	0.00562272	0.677388	Nop10
ENSMUSG00000036850	514.015	-0.239375	0.103177	-2.32004	0.0203389	0.999982	Mrpl41
ENSMUSG00000042650	2798.17	-0.23761	0.0640127	-3.71192	0.000205691	0.0559106	Alkbh5
ENSMUSG00000034892	2978.76	-0.236701	0.0804526	-2.94212	0.00325969	0.479335	Rps29
ENSMUSG00000039221	1582.51	-0.23633	0.0896122	-2.63725	0.00835817	0.810599	Rpl22l1
ENSMUSG00000036372	550.302	-0.235751	0.115549	-2.04027	0.0413239	0.999982	Tmem258
ENSMUSG00000049502	821.424	-0.235069	0.0886085	-2.6529	0.00798034	0.799817	Dtx3l
ENSMUSG00000071528	992.449	-0.23384	0.0992199	-2.35679	0.0184337	0.999982	Atp5md
ENSMUSG00000071528	992.449	-0.23384	0.0992199	-2.35679	0.0184337	0.999982	Gm35857
ENSMUSG00000007836	10847.3	-0.230747	0.0766119	-3.01189	0.00259625	0.415864	Hnrnpa0
ENSMUSG00000096842	949.914	-0.230241	0.0903946	-2.54706	0.0108633	0.898102	NA
ENSMUSG00000022635	571.369	-0.226355	0.0989099	-2.2885	0.0221085	0.999982	Zcrb1
ENSMUSG00000049960	498.455	-0.224374	0.108057	-2.07644	0.0378533	0.999982	Mrps16
ENSMUSG00000007656	1251.45	-0.219043	0.0885869	-2.47263	0.0134123	0.982108	Arpp19
ENSMUSG00000002477	1480.3	-0.219033	0.0783122	-2.79691	0.00515932	0.642765	Snrpd1
ENSMUSG00000026960	635.251	-0.217768	0.0976904	-2.22916	0.0258031	0.999982	Arl6ip6
ENSMUSG00000066149	601.353	-0.217701	0.0986035	-2.20784	0.0272552	0.999982	Cdc26
ENSMUSG00000033730	3310.79	-0.215318	0.0946012	-2.27606	0.0228423	0.999982	Egr3
ENSMUSG00000032249	6018.44	-0.215239	0.0562292	-3.82789	0.000129248	0.0393002	Anp32a
ENSMUSG00000091537	2385.49	-0.213555	0.0773645	-2.76037	0.00577352	0.682797	Tma7
ENSMUSG00000091537	2385.49	-0.213555	0.0773645	-2.76037	0.00577352	0.682797	Tma7-ps
ENSMUSG00000040599	674.185	-0.213306	0.0945105	-2.25695	0.0240111	0.999982	Mis12
ENSMUSG00000056962	726.857	-0.211943	0.0945426	-2.24177	0.0249762	0.999982	Jmjd6
ENSMUSG00000039967	775.405	-0.211893	0.100179	-2.11514	0.0344179	0.999982	Zfp292
ENSMUSG00000031231	882.261	-0.210142	0.105671	-1.98864	0.0467408	0.999982	Cox7b
ENSMUSG00000079435	3744.23	-0.206626	0.077418	-2.66897	0.0076085	0.793584	Rpl36a
ENSMUSG00000021831	1099.88	-0.206426	0.0781688	-2.64077	0.0082717	0.810599	Ero1a
ENSMUSG00000093674	8307.03	-0.20522	0.0780384	-2.62973	0.00854532	0.810599	Rpl41
ENSMUSG00000040824	2178.26	-0.203571	0.0804632	-2.52999	0.0114067	0.921784	Snrpd2
ENSMUSG00000004319	927.353	-0.198973	0.0987798	-2.01431	0.0439772	0.999982	Clcn3
ENSMUSG00000024639	845.108	-0.196478	0.0944478	-2.08029	0.0374993	0.999982	Gnaq
ENSMUSG00000027533	728.121	-0.196359	0.0952904	-2.06064	0.0393372	0.999982	Fabp5
ENSMUSG00000017778	1242.12	-0.192907	0.0883986	-2.18224	0.0290915	0.999982	Cox7c
ENSMUSG00000073702	6508.99	-0.191862	0.0678113	-2.82935	0.00466425	0.619827	Rpl31
ENSMUSG00000022797	11142.2	-0.19154	0.0633067	-3.02559	0.00248152	0.401067	Tfrc
ENSMUSG00000055681	966.447	-0.190741	0.0922567	-2.06751	0.0386862	0.999982	Cope
ENSMUSG00000008683	7011.3	-0.190654	0.0705152	-2.70374	0.00685649	0.740997	Rps15a
ENSMUSG00000096727	2144.83	-0.190612	0.083236	-2.29002	0.02202	0.999982	Psmb9
ENSMUSG00000029201	856.144	-0.190462	0.0970737	-1.96203	0.0497585	0.999982	Ugdh
ENSMUSG00000021520	1192.38	-0.188707	0.0893272	-2.11254	0.03464	0.999982	Uqcrb
ENSMUSG00000038274	5747.85	-0.185914	0.0706398	-2.63186	0.00849185	0.810599	Fau
ENSMUSG00000069094	1167.01	-0.185417	0.0839195	-2.20946	0.0271426	0.999982	Pde7a
ENSMUSG00000080374	1321.22	-0.183913	0.0894608	-2.0558	0.0398019	0.999982	NA
ENSMUSG00000053332	908.636	-0.182562	0.0912039	-2.00169	0.0453182	0.999982	Gas5
ENSMUSG00000027752	938.443	-0.182213	0.0890468	-2.04626	0.0407311	0.999982	Exosc8
ENSMUSG00000054072	3588.15	-0.180664	0.0895436	-2.01761	0.0436317	0.999982	Iigp1
ENSMUSG00000027810	1325.74	-0.180282	0.0789974	-2.28213	0.0224816	0.999982	Eif2a
ENSMUSG00000024513	1614.6	-0.180264	0.0787272	-2.28973	0.0220367	0.999982	Mbd2
ENSMUSG00000043445	1098.65	-0.179638	0.0875346	-2.05219	0.0401509	0.999982	Pgp
ENSMUSG00000029632	1350.78	-0.17677	0.0804258	-2.19792	0.0279547	0.999982	Ndufa4
ENSMUSG00000060636	4163.86	-0.172988	0.0608886	-2.84106	0.0044964	0.611102	Rpl35a
ENSMUSG00000079197	3170.05	-0.171873	0.0849009	-2.02439	0.0429298	0.999982	Psme2
ENSMUSG00000057863	3439.6	-0.171218	0.061713	-2.77442	0.00552997	0.677388	Rpl36
ENSMUSG00000025630	2397.16	-0.170439	0.084268	-2.02258	0.043116	0.999982	Hprt
ENSMUSG00000062981	1252.13	-0.169707	0.0861849	-1.9691	0.0489412	0.999982	Mrpl42
ENSMUSG00000062997	5293.07	-0.168986	0.0591393	-2.85742	0.00427102	0.5894	Rpl35
ENSMUSG00000074884	1542.21	-0.16856	0.0812116	-2.07557	0.0379336	0.999982	Serf2
ENSMUSG00000023175	3126.68	-0.166695	0.0663919	-2.51078	0.0120465	0.935562	Bsg
ENSMUSG00000022205	3889.82	-0.162771	0.0665973	-2.44411	0.0145209	0.999982	Sub1
ENSMUSG00000028965	1910.32	-0.161975	0.0686925	-2.35797	0.018375	0.999982	Tnfrsf9
ENSMUSG00000063457	7450.9	-0.161158	0.070623	-2.28195	0.0224924	0.999982	Rps15
ENSMUSG00000003429	11809.2	-0.1583	0.0670898	-2.35952	0.0182984	0.999982	Rps11
ENSMUSG00000020077	2757.76	-0.157394	0.064593	-2.4367	0.0148221	0.999982	Srgn
ENSMUSG00000028936	3931.49	-0.155792	0.0786065	-1.98192	0.0474878	0.999982	Rpl22
ENSMUSG00000028961	2831.16	-0.15237	0.0630253	-2.4176	0.0156231	0.999982	Pgd
ENSMUSG00000021109	3416.84	-0.151169	0.0726279	-2.08141	0.0373963	0.999982	Hif1a
ENSMUSG00000046364	9836.08	-0.148906	0.071974	-2.06888	0.0385571	0.999982	Rpl27a
ENSMUSG00000008668	9974.73	-0.144674	0.0655097	-2.20844	0.0272133	0.999982	Rps18
ENSMUSG00000059291	8917.53	-0.143764	0.0592174	-2.42773	0.0151936	0.999982	Rpl11
ENSMUSG00000059291	8917.53	-0.143764	0.0592174	-2.42773	0.0151936	0.999982	LOC115489947
ENSMUSG00000035295	4159.3	-0.138257	0.0663734	-2.08301	0.03725	0.999982	Wdr38
ENSMUSG00000040204	4621.58	-0.136051	0.064327	-2.11499	0.0344311	0.999982	Pclaf
ENSMUSG00000057841	9318.09	-0.133859	0.067311	-1.98866	0.0467383	0.999982	Rpl32
ENSMUSG00000029623	2548.5	-0.131238	0.0651717	-2.01373	0.0440378	0.999982	Pdap1
ENSMUSG00000049517	7574.65	-0.131126	0.0575133	-2.27992	0.0226125	0.999982	Rps23
ENSMUSG00000063316	10253.3	-0.127314	0.0605451	-2.1028	0.0354835	0.999982	Rpl27
ENSMUSG00000058600	6538.49	-0.12525	0.0598223	-2.09371	0.0362859	0.999982	Rpl30
ENSMUSG00000012405	6910.39	-0.123236	0.0562394	-2.19127	0.0284325	0.999982	Rpl15
ENSMUSG00000079523	8466.44	-0.117891	0.0536276	-2.19833	0.0279259	0.999982	Tmsb10
ENSMUSG00000046865	5971.3	-0.113437	0.0568375	-1.99582	0.0459537	0.999982	Fbl
ENSMUSG00000028081	18840.4	-0.112866	0.0557094	-2.02599	0.0427661	0.999982	Rps3a1
ENSMUSG00000000568	6978.33	-0.105786	0.0536544	-1.97162	0.0486526	0.999982	Hnrnpd
ENSMUSG00000038014	4432.54	0.116427	0.0582751	1.99788	0.0457293	0.999982	Fam120a
ENSMUSG00000017707	3865.55	0.121191	0.0603608	2.00778	0.044667	0.999982	Serinc3
ENSMUSG00000041740	2810.93	0.122919	0.0614107	2.00159	0.0453289	0.999982	Rnf10
ENSMUSG00000064367	8327.68	0.124274	0.0568467	2.18612	0.0288065	0.999982	ND5
ENSMUSG00000030835	3106.76	0.126832	0.0624969	2.02941	0.0424165	0.999982	Nomo1
ENSMUSG00000013629	6593.04	0.128406	0.0639057	2.0093	0.0445048	0.999982	Cad
ENSMUSG00000010277	3693.37	0.128645	0.0639264	2.0124	0.044178	0.999982	Bltp2
ENSMUSG00000105987	9039.23	0.13342	0.0541256	2.465	0.0137012	0.990883	NA
ENSMUSG00000020456	3927.92	0.135334	0.062403	2.1687	0.0301051	0.999982	Ogdh
ENSMUSG00000059552	2632.19	0.135909	0.0638278	2.1293	0.0332291	0.999982	Trp53
ENSMUSG00000003644	2192.42	0.138322	0.0695305	1.98937	0.0466601	0.999982	Rps6ka1
ENSMUSG00000064345	5897.34	0.143021	0.0576818	2.47948	0.0131574	0.982064	ND2
ENSMUSG00000014498	2608.17	0.144094	0.0701468	2.05418	0.0399586	0.999982	Ankrd52
ENSMUSG00000003660	4981.55	0.144116	0.0651307	2.21272	0.0269169	0.999982	Snrnp200
ENSMUSG00000028868	2575.6	0.144938	0.0679775	2.13214	0.0329953	0.999982	Wasf2
ENSMUSG00000028960	1757.07	0.145229	0.0693208	2.09503	0.0361683	0.999982	Ube4b
ENSMUSG00000041638	3079.43	0.145585	0.0651117	2.23593	0.0253562	0.999982	Gcn1
ENSMUSG00000064351	30810.2	0.152513	0.0594811	2.56406	0.0103454	0.873378	COX1
ENSMUSG00000030104	1668.27	0.152802	0.0721257	2.11856	0.034128	0.999982	Edem1
ENSMUSG00000024393	8259.33	0.153159	0.0689125	2.22251	0.0262489	0.999982	Prrc2a
ENSMUSG00000039703	1730.1	0.155375	0.0684639	2.26944	0.0232416	0.999982	Nploc4
ENSMUSG00000022961	4416.85	0.15541	0.0669128	2.32257	0.0202023	0.999982	Son
ENSMUSG00000028759	1400.19	0.156686	0.0796376	1.96749	0.0491272	0.999982	Hp1bp3
ENSMUSG00000047810	1406.81	0.157079	0.0761014	2.06407	0.0390109	0.999982	Ccdc88b
ENSMUSG00000032777	2022.81	0.157358	0.0797467	1.97322	0.0484704	0.999982	Gtf3c1
ENSMUSG00000010936	1160.06	0.158486	0.0788797	2.00922	0.0445141	0.999982	Vac14
ENSMUSG00000064363	3390.94	0.160024	0.0646805	2.47407	0.0133582	0.982108	ND4
ENSMUSG00000001280	1563.22	0.161569	0.074826	2.15927	0.0308294	0.999982	Sp1
ENSMUSG00000053293	2818.43	0.16207	0.0683192	2.37225	0.01768	0.999982	Pom121
ENSMUSG00000020437	1136.96	0.162291	0.0804117	2.01825	0.0435657	0.999982	Myo1g
ENSMUSG00000007080	1631.18	0.163875	0.0727103	2.2538	0.0242087	0.999982	Pole
ENSMUSG00000052299	1379.03	0.163989	0.0749725	2.18732	0.0287188	0.999982	Ltn1
ENSMUSG00000001785	1259.25	0.16406	0.0793743	2.06692	0.0387417	0.999982	Pwp1
ENSMUSG00000027162	1071.52	0.164913	0.0805713	2.0468	0.0406779	0.999982	Lin7c
ENSMUSG00000026667	2744.85	0.165015	0.0670136	2.46241	0.0138008	0.990883	Uhmk1
ENSMUSG00000057738	3219.25	0.168052	0.0754336	2.22781	0.0258932	0.999982	Sptan1
ENSMUSG00000004356	2927.72	0.168756	0.0727536	2.31955	0.020365	0.999982	Utp20
ENSMUSG00000004535	1371.05	0.168858	0.0825864	2.04462	0.0408925	0.999982	Tax1bp1
ENSMUSG00000039218	5958.6	0.169959	0.0777463	2.18608	0.02881	0.999982	Srrm2
ENSMUSG00000005198	5823.21	0.17191	0.0654262	2.62754	0.00860059	0.810599	Polr2a
ENSMUSG00000087381	1130.69	0.17223	0.0802388	2.14647	0.0318356	0.999982	NA
ENSMUSG00000045962	3880.54	0.173696	0.0740207	2.34659	0.0189463	0.999982	Wnk1
ENSMUSG00000028465	5563.94	0.17432	0.0690127	2.52591	0.01154	0.925268	Tln1
ENSMUSG00000020850	9398.69	0.1744	0.0652518	2.67272	0.007524	0.789826	Prpf8
ENSMUSG00000031232	1055.16	0.175967	0.085547	2.05696	0.0396904	0.999982	Magt1
ENSMUSG00000030451	985.536	0.175978	0.0862755	2.03973	0.0413777	0.999982	Herc2
ENSMUSG00000037944	2800.41	0.177107	0.0679605	2.60603	0.00915996	0.821649	Ccr7
ENSMUSG00000008730	2247.15	0.180001	0.0649409	2.77177	0.00557524	0.677388	Hipk1
ENSMUSG00000027006	1166.2	0.180749	0.0878008	2.05863	0.0395298	0.999982	Dnajc10
ENSMUSG00000024597	832.659	0.181378	0.0925022	1.9608	0.0499026	0.999982	Slc12a2
ENSMUSG00000001229	1452.29	0.182895	0.074891	2.44214	0.0146003	0.999982	Dpp9
ENSMUSG00000031506	2962.54	0.184946	0.0781218	2.36741	0.0179131	0.999982	Ptpn7
ENSMUSG00000028970	1054.85	0.186822	0.0906181	2.06164	0.0392425	0.999982	Abcb1b
ENSMUSG00000020184	1263.05	0.186907	0.0835349	2.23747	0.0252555	0.999982	Mdm2
ENSMUSG00000025153	11949	0.18775	0.0616627	3.0448	0.00232838	0.383168	Fasn
ENSMUSG00000041187	958.44	0.187903	0.0852369	2.20448	0.0274908	0.999982	Prkd2
ENSMUSG00000028341	4634.23	0.187932	0.0948761	1.98082	0.0476118	0.999982	Nr4a3
ENSMUSG00000043207	1513.65	0.188113	0.074551	2.52328	0.0116266	0.925268	Zmpste24
ENSMUSG00000045482	2455.77	0.188937	0.0799804	2.36229	0.0181625	0.999982	Trrap
ENSMUSG00000022614	918.332	0.189111	0.0842346	2.24506	0.0247645	0.999982	Lmf2
ENSMUSG00000000078	1543.63	0.189826	0.0873304	2.17365	0.0297316	0.999982	Klf6
ENSMUSG00000034297	1061.79	0.190204	0.093114	2.0427	0.0410821	0.999982	Med13
ENSMUSG00000032504	2500.11	0.190312	0.0644747	2.95173	0.00316003	0.476394	Pdcd6ip
ENSMUSG00000040054	1094.38	0.190351	0.0909512	2.09289	0.0363587	0.999982	Baz2a
ENSMUSG00000024002	2584.94	0.191865	0.0706153	2.71705	0.00658665	0.731064	Brd4
ENSMUSG00000022443	17304.7	0.193221	0.0652837	2.95971	0.00307931	0.46816	Myh9
ENSMUSG00000030609	962.821	0.193227	0.0841094	2.29733	0.0216	0.999982	Aen
ENSMUSG00000044308	904.955	0.19378	0.0903395	2.14502	0.0319513	0.999982	Ubr3
ENSMUSG00000036918	804.369	0.194453	0.0861929	2.25603	0.0240689	0.999982	Ttc7
ENSMUSG00000027601	659.38	0.195737	0.093928	2.08391	0.0371685	0.999982	Mtfr1
ENSMUSG00000054720	775.991	0.196294	0.0917653	2.13909	0.0324286	0.999982	Lrrc8c
ENSMUSG00000029505	1814.66	0.197777	0.0817423	2.41952	0.0155411	0.999982	Ep400
ENSMUSG00000020721	1023.37	0.198245	0.0931679	2.12782	0.0333519	0.999982	Helz
ENSMUSG00000027651	1024.58	0.199842	0.0826765	2.41716	0.0156421	0.999982	Rprd1b
ENSMUSG00000037242	1511.9	0.199913	0.0750374	2.66418	0.00771752	0.799817	Clic4
ENSMUSG00000020196	1041.89	0.200135	0.0906623	2.20748	0.0272807	0.999982	Cabin1
ENSMUSG00000028581	7567.61	0.200287	0.0693907	2.88636	0.00389724	0.546223	Laptm5
ENSMUSG00000037674	1375.03	0.200673	0.0833209	2.40843	0.0160211	0.999982	Rfx7
ENSMUSG00000024073	3045.36	0.202334	0.0877271	2.30641	0.021088	0.999982	Birc6
ENSMUSG00000032410	781.252	0.206144	0.0938037	2.19762	0.0279765	0.999982	Xrn1
ENSMUSG00000090290	860.192	0.20919	0.0911842	2.29415	0.0217819	0.999982	Tarbp1
ENSMUSG00000045328	1289.4	0.209781	0.0974228	2.15331	0.0312944	0.999982	Cenpe
ENSMUSG00000017386	885.1	0.209961	0.0854398	2.45741	0.0139942	0.999982	Traf4
ENSMUSG00000054008	833.632	0.210676	0.0909318	2.31686	0.0205115	0.999982	Ndst1
ENSMUSG00000115728	562.649	0.211258	0.101259	2.08632	0.03695	0.999982	NA
ENSMUSG00000031246	951.561	0.211507	0.0930092	2.27404	0.0229635	0.999982	Sh3bgrl
ENSMUSG00000040274	1194.03	0.211885	0.078678	2.69307	0.00707974	0.756015	Cdk6
ENSMUSG00000031328	6293.12	0.213337	0.0752225	2.83608	0.00456706	0.616039	Flna
ENSMUSG00000024319	989.201	0.214032	0.0876101	2.443	0.0145656	0.999982	Vps52
ENSMUSG00000029478	1410.63	0.215767	0.0896613	2.40647	0.0161075	0.999982	Ncor2
ENSMUSG00000041272	873.143	0.216531	0.107981	2.00527	0.0449341	0.999982	Tox
ENSMUSG00000038664	946.964	0.218623	0.10623	2.05801	0.0395889	0.999982	Herc1
ENSMUSG00000026827	811.793	0.219198	0.103266	2.12265	0.0337828	0.999982	Gpd2
ENSMUSG00000029772	882.743	0.219524	0.0866333	2.53395	0.0112784	0.919706	Ahcyl2
ENSMUSG00000001855	1940.15	0.219612	0.0805355	2.7269	0.0063932	0.725912	Nup214
ENSMUSG00000028080	770.912	0.219942	0.102422	2.14742	0.0317602	0.999982	Lrba
ENSMUSG00000029763	945.62	0.220394	0.0962068	2.29084	0.0219729	0.999982	Exoc4
ENSMUSG00000023830	1592.9	0.221829	0.0806565	2.7503	0.00595414	0.692728	Igf2r
ENSMUSG00000063077	643.995	0.221858	0.109192	2.03182	0.0421714	0.999982	Kif1b
ENSMUSG00000050921	432.128	0.223835	0.112461	1.99033	0.0465548	0.999982	P2ry10
ENSMUSG00000027580	670.212	0.224496	0.110935	2.02367	0.0430037	0.999982	Helz2
ENSMUSG00000030123	396.898	0.226511	0.114908	1.97124	0.048696	0.999982	Plxnd1
ENSMUSG00000052102	453.644	0.226879	0.109151	2.07857	0.0376565	0.999982	Gnpda1
ENSMUSG00000026605	856.17	0.228255	0.110781	2.06042	0.0393588	0.999982	Cenpf
ENSMUSG00000025224	889.605	0.228378	0.0983111	2.32301	0.0201786	0.999982	Gbf1
ENSMUSG00000022587	2132.75	0.230186	0.0748883	3.07372	0.00211406	0.364675	Ly6e
ENSMUSG00000039262	2767.05	0.230296	0.0770528	2.98881	0.00280066	0.440736	Prrc2b
ENSMUSG00000032384	686.586	0.231225	0.0992968	2.32863	0.0198788	0.999982	Csnk1g1
ENSMUSG00000026875	880.964	0.232199	0.0972503	2.38765	0.0169566	0.999982	Traf1
ENSMUSG00000037405	552.141	0.232327	0.113873	2.04023	0.0413271	0.999982	Icam1
ENSMUSG00000030655	1526.92	0.232879	0.102919	2.26274	0.0236518	0.999982	Smg1
ENSMUSG00000022799	506.918	0.233054	0.103129	2.25984	0.0238314	0.999982	Arhgap31
ENSMUSG00000022385	1170.41	0.236596	0.0768241	3.07971	0.00207201	0.363996	Gtse1
ENSMUSG00000025261	4599.87	0.237939	0.0896493	2.65411	0.00795177	0.799817	Huwe1
ENSMUSG00000048279	923.173	0.238526	0.112279	2.12441	0.0336357	0.999982	Sacs
ENSMUSG00000028284	1660.41	0.239977	0.0767218	3.12788	0.00176069	0.325638	Map3k7
ENSMUSG00000034342	1956.98	0.240041	0.0902529	2.65964	0.00782235	0.799817	Cbl
ENSMUSG00000020647	391.57	0.240281	0.12068	1.99106	0.0464741	0.999982	Ncoa1
ENSMUSG00000031662	334.331	0.240374	0.121691	1.97528	0.0482368	0.999982	Snx20
ENSMUSG00000059895	1908.01	0.242286	0.0977904	2.4776	0.0132268	0.982064	Ptp4a3
ENSMUSG00000033004	1815.92	0.243973	0.0961288	2.53798	0.0111493	0.91333	Mycbp2
ENSMUSG00000048154	1264.84	0.246764	0.0979627	2.51896	0.0117703	0.930221	Kmt2d
ENSMUSG00000040018	561.9	0.2473	0.102282	2.41783	0.0156135	0.999982	Cox15
ENSMUSG00000032253	1007.53	0.247739	0.0943241	2.62647	0.00862759	0.810599	Phip
ENSMUSG00000036698	3764.95	0.251413	0.0771362	3.25933	0.00111674	0.232958	Ago2
ENSMUSG00000046574	699.669	0.252922	0.0984587	2.56881	0.0102048	0.873378	Prr12
ENSMUSG00000044167	824.795	0.253531	0.0936825	2.70628	0.00680418	0.7398	Foxo1
ENSMUSG00000031995	396.351	0.256325	0.125405	2.04398	0.0409559	0.999982	St14
ENSMUSG00000001151	898.92	0.256689	0.0933891	2.7486	0.00598511	0.692728	Pcnt
ENSMUSG00000015143	2221.85	0.25889	0.0695678	3.7214	0.000198123	0.0552661	Actn1
ENSMUSG00000022474	328.218	0.262194	0.128505	2.04035	0.0413156	0.999982	Pmm1
ENSMUSG00000014444	1429.07	0.263233	0.0851317	3.09206	0.00198771	0.360197	Piezo1
ENSMUSG00000022672	399.99	0.264701	0.117714	2.24868	0.024533	0.999982	Prkdc
ENSMUSG00000032182	552.09	0.264977	0.101628	2.60731	0.00912561	0.821649	Yipf2
ENSMUSG00000041058	360.107	0.265048	0.123191	2.15152	0.0314353	0.999982	Wwp1
ENSMUSG00000097025	358.598	0.265258	0.125849	2.10775	0.0350527	0.999982	NA
ENSMUSG00000031485	485.475	0.267231	0.113367	2.35723	0.018412	0.999982	Plpbp
ENSMUSG00000058454	707.83	0.269329	0.0960332	2.80454	0.00503881	0.635143	Dhcr7
ENSMUSG00000058006	2034.24	0.271	0.104956	2.58203	0.00982206	0.853336	Mdn1
ENSMUSG00000030172	357.222	0.271574	0.129888	2.09083	0.0365429	0.999982	Erc1
ENSMUSG00000085819	340.697	0.27179	0.132151	2.05667	0.0397179	0.999982	NA
ENSMUSG00000002028	922.221	0.273028	0.131254	2.08014	0.0375123	0.999982	Kmt2a
ENSMUSG00000040407	606.144	0.273748	0.111071	2.46463	0.0137155	0.990883	Akap9
ENSMUSG00000028599	839.432	0.277582	0.091165	3.04483	0.00232809	0.383168	Tnfrsf1b
ENSMUSG00000040918	481.421	0.278659	0.136562	2.04053	0.041298	0.999982	Slc19a2
ENSMUSG00000039686	294.689	0.280814	0.129837	2.16282	0.030555	0.999982	Zer1
ENSMUSG00000027009	875.117	0.281965	0.134557	2.09552	0.0361252	0.999982	Itga4
ENSMUSG00000034243	339.04	0.285773	0.130833	2.18427	0.0289426	0.999982	Golgb1
ENSMUSG00000037679	354.186	0.286061	0.132545	2.15822	0.0309108	0.999982	Inf2
ENSMUSG00000065979	288.77	0.290581	0.14351	2.02481	0.0428873	0.999982	Cpped1
ENSMUSG00000026014	359.791	0.29181	0.147992	1.97179	0.0486335	0.999982	Raph1
ENSMUSG00000002083	337.239	0.29272	0.123245	2.3751	0.017544	0.999982	Bbc3
ENSMUSG00000030095	452.219	0.293223	0.111741	2.62412	0.00868724	0.810599	Tmem43
ENSMUSG00000098573	308.725	0.295354	0.138439	2.13347	0.0328865	0.999982	NA
ENSMUSG00000018707	2628.86	0.295575	0.0883849	3.34418	0.000825248	0.187404	Dync1h1
ENSMUSG00000019866	581.479	0.29894	0.136657	2.18752	0.0287045	0.999982	Crybg1
ENSMUSG00000066036	2088.71	0.299998	0.0929714	3.22677	0.00125194	0.253992	Ubr4
ENSMUSG00000027171	322.412	0.300343	0.133948	2.24223	0.0249462	0.999982	Prrg4
ENSMUSG00000021298	272.254	0.303993	0.13912	2.1851	0.0288812	0.999982	Gpr132
ENSMUSG00000026478	309.228	0.30555	0.13235	2.30866	0.0209624	0.999982	Lamc1
ENSMUSG00000021182	443.503	0.306957	0.148654	2.06491	0.0389311	0.999982	Ccdc88c
ENSMUSG00000061533	237.376	0.309438	0.148193	2.08807	0.0367917	0.999982	Cep128
ENSMUSG00000058761	364.072	0.313368	0.120079	2.60968	0.00906278	0.821649	Rnf169
ENSMUSG00000020326	4676.57	0.316181	0.0747983	4.22712	2.367e-05	0.00903489	Ccng1
ENSMUSG00000027472	410.612	0.316793	0.119717	2.64618	0.00814062	0.80901	Pdrg1
ENSMUSG00000030641	515.75	0.321148	0.109781	2.92535	0.00344074	0.494395	Ddias
ENSMUSG00000015932	313.592	0.324246	0.159364	2.03462	0.0418889	0.999982	Dstn
ENSMUSG00000042042	183.693	0.327539	0.164341	1.99304	0.046257	0.999982	Csgalnact2
ENSMUSG00000064339	7391.01	0.327766	0.0687686	4.76622	1.87716e-06	0.000935453	NA
ENSMUSG00000041801	502.817	0.328442	0.139026	2.36245	0.0181548	0.999982	Phlda3
ENSMUSG00000099083	258.326	0.328492	0.139918	2.34774	0.0188877	0.999982	Atf7
ENSMUSG00000035778	564.656	0.331281	0.124805	2.65438	0.00794548	0.799817	Ggta1
ENSMUSG00000042349	237.397	0.338476	0.150224	2.25314	0.0242501	0.999982	Ikbke
ENSMUSG00000071657	221.568	0.341329	0.155287	2.19806	0.0279451	0.999982	Bscl2
ENSMUSG00000034731	269.698	0.355999	0.179395	1.98444	0.0472073	0.999982	Dgkh
ENSMUSG00000022565	816.361	0.356645	0.103285	3.453	0.000554383	0.136241	Plec
ENSMUSG00000071552	368.155	0.361667	0.138471	2.61186	0.00900508	0.821649	Tigit
ENSMUSG00000021668	278.277	0.368508	0.134506	2.73971	0.00614937	0.702673	Polk
ENSMUSG00000021767	163.088	0.374646	0.177427	2.11156	0.0347246	0.999982	Kat6b
ENSMUSG00000096993	207.386	0.384546	0.154686	2.48598	0.0129194	0.973839	Gm26787
ENSMUSG00000019979	651.578	0.387057	0.102386	3.78037	0.000156595	0.0460544	Apaf1
ENSMUSG00000033306	150.263	0.387308	0.18005	2.15112	0.0314668	0.999982	Lpp
ENSMUSG00000032657	145.21	0.398513	0.188223	2.11724	0.0342393	0.999982	Entrep3
ENSMUSG00000038604	177.924	0.40178	0.179663	2.2363	0.0253322	0.999982	Ripor1
ENSMUSG00000030084	416.08	0.408835	0.133288	3.06731	0.00215995	0.369044	Plxna1
ENSMUSG00000034501	131.357	0.416789	0.207848	2.00526	0.0449355	0.999982	Pcnx4
ENSMUSG00000020593	159.121	0.417259	0.19419	2.14871	0.031657	0.999982	Lpin1
ENSMUSG00000054150	481.687	0.418655	0.113063	3.70285	0.000213192	0.0570844	Syne3
ENSMUSG00000021185	354.818	0.422835	0.175565	2.40842	0.0160217	0.999982	Dglucy
ENSMUSG00000040997	183.967	0.423099	0.168289	2.51412	0.0119331	0.932802	Abhd4
ENSMUSG00000048458	198.938	0.428267	0.176201	2.43056	0.0150755	0.999982	Inka2
ENSMUSG00000028893	465.408	0.438734	0.130524	3.36132	0.000775707	0.18073	Sesn2
ENSMUSG00000043099	213.778	0.452323	0.196421	2.30282	0.0212887	0.999982	Hic1
ENSMUSG00000027663	924.427	0.453195	0.0974466	4.6507	3.30803e-06	0.00152169	Zmat3
ENSMUSG00000020806	126.214	0.457506	0.194713	2.34964	0.0187915	0.999982	Rhbdf2
ENSMUSG00000011831	105.749	0.457592	0.217972	2.09931	0.0357893	0.999982	Evi5
ENSMUSG00000068744	299.792	0.468696	0.141531	3.3116	0.000927629	0.205297	Psrc1
ENSMUSG00000047139	107.229	0.482762	0.232354	2.0777	0.0377367	0.999982	Cd24a
ENSMUSG00000117050	401.131	0.486212	0.156767	3.10149	0.0019255	0.352485	NA
ENSMUSG00000037855	238.335	0.49821	0.169751	2.93495	0.00333603	0.486573	Zfp365
ENSMUSG00000045362	85.8469	0.516377	0.238484	2.16525	0.0303688	0.999982	Tnfrsf26
ENSMUSG00000009551	86.4172	0.517065	0.256683	2.01441	0.0439667	0.999982	6330409D20Rik
ENSMUSG00000027763	9482.57	0.522416	0.0624128	8.37032	5.74599e-17	7.92946e-14	Mbnl1
ENSMUSG00000075256	157.453	0.534832	0.235531	2.27075	0.023162	0.999982	Cerkl
ENSMUSG00000023067	1499.87	0.558435	0.236018	2.36607	0.0179779	0.999982	Cdkn1a
ENSMUSG00000110631	747.859	0.561205	0.258467	2.17129	0.0299096	0.999982	NA
ENSMUSG00000028211	976.16	0.581823	0.0932051	6.24239	4.3093e-10	2.97342e-07	Trp53inp1
ENSMUSG00000016526	92.0324	0.58581	0.22843	2.5645	0.0103323	0.873378	Dyrk3
ENSMUSG00000118642	3112.28	0.615456	0.297759	2.06696	0.0387378	0.999982	NA
ENSMUSG00000026070	71.2511	0.616238	0.314069	1.96211	0.0497496	0.999982	Il18r1
ENSMUSG00000026249	272.675	0.617329	0.14548	4.24338	2.20174e-05	0.00877762	Serpine2
ENSMUSG00000029101	93.6903	0.619668	0.226125	2.74038	0.00613688	0.702673	Rgs12
ENSMUSG00000019851	73.0481	0.648544	0.260724	2.48748	0.0128653	0.973839	Perp
ENSMUSG00000112964	46.5012	0.663703	0.309391	2.14519	0.0319374	0.999982	NA
ENSMUSG00000033855	68.6158	0.667482	0.257862	2.58853	0.00963876	0.85182	Ston1
ENSMUSG00000024769	47.08	0.682862	0.327673	2.08398	0.0371622	0.999982	Cdc42bpg
ENSMUSG00000034881	62.8125	0.712949	0.271174	2.62912	0.00856052	0.810599	Tbxa2r
ENSMUSG00000050953	39.6896	0.716699	0.358475	1.9993	0.0455761	0.999982	Gja1
ENSMUSG00000038555	37.6266	0.723379	0.343914	2.10337	0.0354331	0.999982	Reep2
ENSMUSG00000026399	46.0508	0.742625	0.336048	2.20988	0.0271138	0.999982	Cd55
ENSMUSG00000032606	46.2372	0.746943	0.315452	2.36785	0.0178918	0.999982	Nicn1
ENSMUSG00000039450	68.1451	0.76044	0.274644	2.76882	0.00562602	0.677388	Dcxr
ENSMUSG00000028927	45.5958	0.786836	0.317651	2.47705	0.0132475	0.982064	Padi2
ENSMUSG00000030522	56.6761	0.818306	0.291938	2.80302	0.00506273	0.635143	Mtmr10
ENSMUSG00000095607	32.9903	0.824031	0.374248	2.20183	0.0276773	0.999982	Trav5-4
ENSMUSG00000097145	59.2789	0.894692	0.321157	2.78584	0.00533895	0.660557	9230114K14Rik
ENSMUSG00000093966	24.3046	0.92299	0.440951	2.09318	0.0363331	0.999982	Trav4-3
ENSMUSG00000095562	68.08	0.93359	0.317131	2.94386	0.00324143	0.479335	Erdr1x
ENSMUSG00000069273	21.5822	0.95538	0.484012	1.97388	0.0483957	0.999982	H3c6
ENSMUSG00000006356	83.6167	0.963563	0.235608	4.08969	4.31947e-05	0.0154983	Crip2
ENSMUSG00000096768	104.624	0.982719	0.294894	3.33245	0.000860854	0.193046	Erdr1x
ENSMUSG00000034361	46.7495	0.99206	0.324907	3.05337	0.0022629	0.379406	Cpne2
ENSMUSG00000106969	19.1441	1.02649	0.511514	2.00677	0.0447742	0.999982	NA
ENSMUSG00000021614	91.0406	1.0392	0.250411	4.14998	3.32509e-05	0.0121739	Vcan
ENSMUSG00000079092	23.7971	1.04153	0.463665	2.2463	0.0246846	0.999982	Prl2c2
ENSMUSG00000027797	141.815	1.0762	0.271682	3.96123	7.45658e-05	0.024322	Dclk1
ENSMUSG00000075122	45.3634	1.1171	0.332853	3.35614	0.000790389	0.181789	Cd80
ENSMUSG00000086370	16.4852	1.13587	0.565466	2.00873	0.0445657	0.999982	Ftx
ENSMUSG00000026817	17.665	1.16248	0.527967	2.2018	0.0276797	0.999982	Ak1
ENSMUSG00000000308	16.7279	1.18819	0.542697	2.18942	0.0285663	0.999982	Ckmt1
ENSMUSG00000006179	12.2506	1.22097	0.615334	1.98424	0.0472287	0.999982	Prss16
ENSMUSG00000035517	20.3166	1.24604	0.493992	2.52239	0.0116561	0.925268	Tdrd7
ENSMUSG00000020961	13.6441	1.25213	0.620879	2.01671	0.0437256	0.999982	Ston2
ENSMUSG00000069516	11.5938	1.3021	0.654459	1.98958	0.046637	0.999982	Lyz2
ENSMUSG00000033644	11.9576	1.35596	0.660319	2.05349	0.0400252	0.999982	Piwil2
ENSMUSG00000073000	18.95	1.39643	0.514063	2.71646	0.00659843	0.731064	Ppp1r36dn
ENSMUSG00000039238	20.2759	1.43406	0.527944	2.7163	0.00660159	0.731064	Zfp750
ENSMUSG00000000552	40.9628	1.57896	0.3549	4.44903	8.6257e-06	0.00377427	Zfp385a
ENSMUSG00000113238	6.16616	1.85526	0.911956	2.03437	0.041914	0.999982	NA
ENSMUSG00000030149	6.09371	2.04631	1.03865	1.97016	0.0488196	0.999982	Klrk1
ENSMUSG00000026831	7.0934	2.31802	0.929608	2.49355	0.0126473	0.965426	Pierce1
ENSMUSG00000034156	3.46034	2.5677	1.29219	1.9871	0.0469117	0.999982	Tspoap1
ENSMUSG00000068086	7.55706	2.69834	1.04614	2.57934	0.009899	0.853789	Cyp2d9
ENSMUSG00000034792	10.3151	2.77606	0.801245	3.46468	0.000530854	0.132271	Gna15
ENSMUSG00000020723	3.96429	2.78105	1.26059	2.20616	0.027373	0.999982	Cacng4
ENSMUSG00000109008	2.98642	2.9925	1.50497	1.98842	0.0467653	0.999982	NA
ENSMUSG00000082476	3.1854	3.05822	1.5106	2.02451	0.0429182	0.999982	Gm12242
ENSMUSG00000117202	3.1289	3.07007	1.49237	2.05717	0.0396694	0.999982	Gm9349
ENSMUSG00000074629	3.10291	3.0765	1.49585	2.05669	0.0397158	0.999982	NA
ENSMUSG00000047591	2.27766	3.56889	1.72068	2.07412	0.0380681	0.999982	Mafa
ENSMUSG00000108832	2.4547	3.67838	1.68266	2.18605	0.0288119	0.999982	NA
ENSMUSG00000006411	2.83239	3.89361	1.63062	2.38781	0.0169489	0.999982	Nectin4
ENSMUSG00000090891	1.49024	4.01813	1.96912	2.04058	0.0412931	0.999982	D6Ertd527e
ENSMUSG00000048387	1.49877	4.02494	1.96679	2.04645	0.0407124	0.999982	Osr1
ENSMUSG00000024680	1.62421	4.14633	2.08469	1.98895	0.0467072	0.999982	Ms4a2
ENSMUSG00000103587	8.39944	4.59153	1.21118	3.79094	0.000150078	0.0448732	Gm38326
ENSMUSG00000023000	2.47694	4.75179	1.69212	2.8082	0.00498199	0.633879	Dhh
ENSMUSG00000019737	2.48916	4.75781	1.72475	2.75855	0.00580577	0.682797	Syne4
ENSMUSG00000102298	5.55774	4.91262	1.44162	3.4077	0.000655118	0.156704	NA

## Sheet: P0.05 DN (2-fold, 77)
ems	baseMean	log2FoldChange	lfcSE	stat	pvalue	padj	SYMBOL
ENSMUSG00000015812	2.13177	-4.55197	1.82447	-2.49495	0.0125973	0.965426	Gnrh1
ENSMUSG00000065273	1.97369	-4.44048	1.81135	-2.45148	0.014227	0.999982	Gm25128
ENSMUSG00000078967	1.83388	-4.33128	1.84702	-2.34501	0.0190263	0.999982	Gapdh-ps16
ENSMUSG00000094910	1.80708	-4.31345	1.86867	-2.30831	0.020982	0.999982	D430019H16Rik
ENSMUSG00000108042	1.78881	-4.30112	1.89082	-2.27474	0.0229218	0.999982	NA
ENSMUSG00000032584	1.51935	-4.05674	1.99317	-2.03532	0.0418185	0.999982	Mst1r
ENSMUSG00000085596	1.50108	-4.04209	1.9933	-2.02784	0.0425762	0.999982	Gm11476
ENSMUSG00000106123	1.47346	-4.01989	1.98634	-2.02377	0.0429936	0.999982	NA
ENSMUSG00000054822	1.46453	-4.01229	2.02487	-1.9815	0.047535	0.999982	NA
ENSMUSG00000110647	2.8403	-3.91017	1.61888	-2.41536	0.0157198	0.999982	NA
ENSMUSG00000080868	2.70008	-3.82978	1.66736	-2.29691	0.021624	0.999982	NA
ENSMUSG00000109610	2.1552	-3.48449	1.74584	-1.99588	0.0459466	0.999982	Gm7432
ENSMUSG00000112146	2.14667	-3.48449	1.74735	-1.99416	0.0461349	0.999982	NA
ENSMUSG00000063531	2.15438	-3.48423	1.74595	-1.99561	0.0459768	0.999982	Sema3e
ENSMUSG00000056025	2.1284	-3.47362	1.75908	-1.97468	0.0483044	0.999982	Clca3a1
ENSMUSG00000048794	3.9995	-3.47221	1.3796	-2.51683	0.0118417	0.931751	Cfap100
ENSMUSG00000040026	175.839	-3.21993	0.760308	-4.23503	2.28517e-05	0.00891216	Saa3
ENSMUSG00000029380	44.453	-3.17409	0.513078	-6.18637	6.15672e-10	4.0908e-07	Cxcl1
ENSMUSG00000102900	3.18475	-3.10739	1.44948	-2.14379	0.0320495	0.999982	NA
ENSMUSG00000026822	9.12532	-3.0369	0.935989	-3.24459	0.0011762	0.24254	Lcn2
ENSMUSG00000039217	2.83286	-2.91924	1.48721	-1.96289	0.0496585	0.999982	Il18
ENSMUSG00000025746	5.04283	-2.7595	1.21221	-2.27642	0.0228207	0.999982	Il6
ENSMUSG00000050914	55.3039	-2.75676	0.350331	-7.869	3.57477e-15	4.27542e-12	Ankrd37
ENSMUSG00000031637	40.8822	-2.65012	0.417865	-6.34206	2.26719e-10	1.69473e-07	Lrp2bp
ENSMUSG00000093467	3.48372	-2.60052	1.29838	-2.0029	0.045188	0.999982	NA
ENSMUSG00000050578	3.46952	-2.58899	1.27501	-2.03056	0.0422994	0.999982	Mmp13
ENSMUSG00000032531	17.4718	-2.49666	0.585793	-4.26202	2.02586e-05	0.00826	Amotl2
ENSMUSG00000044258	6.14786	-2.35886	0.984719	-2.39546	0.0165993	0.999982	Ctla2a
ENSMUSG00000117779	7.98023	-2.34669	0.832377	-2.81927	0.00481337	0.630305	NA
ENSMUSG00000025161	575.171	-2.34005	0.122997	-19.0253	1.0531e-80	9.44631e-77	Slc16a3
ENSMUSG00000082179	5.78903	-2.27862	0.964617	-2.3622	0.0181666	0.999982	NA
ENSMUSG00000060594	4.8143	-2.26797	1.051	-2.15791	0.0309348	0.999982	Layn
ENSMUSG00000031778	6.68133	-2.26141	0.978275	-2.31163	0.0207981	0.999982	Cx3cl1
ENSMUSG00000082662	5.14656	-2.08119	0.996466	-2.08857	0.036746	0.999982	NA
ENSMUSG00000052353	29.2408	-2.01474	0.430639	-4.67848	2.89006e-06	0.00136441	Cemip
ENSMUSG00000078566	137.691	-1.96802	0.211557	-9.30259	1.37071e-20	2.23551e-17	Bnip3
ENSMUSG00000032487	40.9183	-1.95016	0.453155	-4.30352	1.68106e-05	0.00718051	Ptgs2
ENSMUSG00000000056	151.059	-1.92566	0.195087	-9.87076	5.57395e-23	1.11107e-19	Narf
ENSMUSG00000028527	272.545	-1.91268	0.152182	-12.5684	3.15168e-36	1.13082e-32	Ak4
ENSMUSG00000059994	9.36944	-1.90269	0.737136	-2.58118	0.00984619	0.853336	Fcrl1
ENSMUSG00000109881	92.4911	-1.79179	0.257636	-6.95474	3.53221e-12	3.16839e-09	NA
ENSMUSG00000020303	63.2187	-1.79157	0.297966	-6.01267	1.82492e-09	1.16925e-06	Stc2
ENSMUSG00000108934	7.16361	-1.75011	0.83403	-2.09838	0.0358719	0.999982	NA
ENSMUSG00000045312	7.10149	-1.72416	0.832747	-2.07045	0.0384104	0.999982	Lhfpl2
ENSMUSG00000019846	7.06089	-1.71855	0.838756	-2.04893	0.0404689	0.999982	Lama4
ENSMUSG00000034205	17.4601	-1.71068	0.562338	-3.04209	0.00234941	0.383168	Loxl2
ENSMUSG00000019929	94.2424	-1.67256	0.298727	-5.59895	2.1565e-08	1.17235e-05	Dcn
ENSMUSG00000026043	159.384	-1.65977	0.490439	-3.38425	0.000713725	0.168477	Col3a1
ENSMUSG00000027750	133.192	-1.65444	0.648176	-2.55245	0.0106969	0.896739	Postn
ENSMUSG00000115431	11.6659	-1.62212	0.728521	-2.22659	0.0259747	0.999982	NA
ENSMUSG00000097989	9.22007	-1.58632	0.76028	-2.08649	0.0369342	0.999982	Gm4335
ENSMUSG00000030623	10.2882	-1.52899	0.696211	-2.19616	0.0280804	0.999982	NA
ENSMUSG00000038451	24.2891	-1.43405	0.450468	-3.18347	0.00145522	0.28088	Spsb2
ENSMUSG00000037440	37.1212	-1.42937	0.369431	-3.8691	0.000109238	0.0343812	Vnn1
ENSMUSG00000056427	18.0942	-1.40928	0.519805	-2.71117	0.00670472	0.737931	Slit3
ENSMUSG00000023456	5961.57	-1.4062	0.0708596	-19.8449	1.22088e-87	2.19027e-83	Tpi1
ENSMUSG00000120507	13.7808	-1.39587	0.577743	-2.41608	0.0156887	0.999982	NA
ENSMUSG00000023951	47.2931	-1.36623	0.338409	-4.03724	5.40849e-05	0.0186593	Vegfa
ENSMUSG00000004098	12.4394	-1.36566	0.692494	-1.97208	0.0485999	0.999982	Col5a3
ENSMUSG00000033316	14.1618	-1.36527	0.572803	-2.3835	0.0171491	0.999982	Galnt9
ENSMUSG00000069008	12.3023	-1.33732	0.619645	-2.1582	0.0309121	0.999982	NA
ENSMUSG00000038235	13.2867	-1.31418	0.603637	-2.1771	0.0294733	0.999982	F11r
ENSMUSG00000032332	103.504	-1.28171	0.511355	-2.50649	0.0121935	0.942893	Col12a1
ENSMUSG00000040152	233.712	-1.27683	0.386093	-3.30705	0.000942851	0.205297	Thbs1
ENSMUSG00000082066	23.9628	-1.24985	0.443106	-2.82067	0.0047924	0.630305	NA
ENSMUSG00000020826	14.1962	-1.21783	0.581858	-2.093	0.0363495	0.999982	Nos2
ENSMUSG00000074280	22.698	-1.21094	0.503664	-2.40426	0.0162054	0.999982	NA
ENSMUSG00000020277	2078.3	-1.20627	0.0712222	-16.9367	2.41463e-64	1.44395e-60	Pfkl
ENSMUSG00000081629	16.0215	-1.20191	0.59738	-2.01197	0.0442236	0.999982	NA
ENSMUSG00000049233	13.1792	-1.19753	0.61016	-1.96265	0.049687	0.999982	Apoo-ps
ENSMUSG00000056836	16.2571	-1.17764	0.581439	-2.02539	0.0428275	0.999982	Pin4-ps
ENSMUSG00000072941	19.8847	-1.16213	0.557526	-2.08443	0.0371207	0.999982	Sod3
ENSMUSG00000022639	67.3672	-1.0956	0.268218	-4.08473	4.41283e-05	0.0155228	NA
ENSMUSG00000015568	36.1033	-1.08958	0.395121	-2.75758	0.00582318	0.682797	Lpl
ENSMUSG00000044330	54.9411	-1.08322	0.399949	-2.70839	0.00676109	0.739597	NA
ENSMUSG00000091269	28.6242	-1.04793	0.465426	-2.25156	0.02435	0.999982	Gm6682
ENSMUSG00000022816	69.8998	-1.0218	0.347106	-2.94377	0.00324239	0.479335	Fstl1

## Sheet: DN gene list excluded NA (55)
ems	baseMean	log2FoldChange	lfcSE	stat	pvalue	padj	SYMBOL
ENSMUSG00000015812	2.13177	-4.55197	1.82447	-2.49495	0.0125973	0.965426	Gnrh1
ENSMUSG00000065273	1.97369	-4.44048	1.81135	-2.45148	0.014227	0.999982	Gm25128
ENSMUSG00000078967	1.83388	-4.33128	1.84702	-2.34501	0.0190263	0.999982	Gapdh-ps16
ENSMUSG00000094910	1.80708	-4.31345	1.86867	-2.30831	0.020982	0.999982	D430019H16Rik
ENSMUSG00000032584	1.51935	-4.05674	1.99317	-2.03532	0.0418185	0.999982	Mst1r
ENSMUSG00000085596	1.50108	-4.04209	1.9933	-2.02784	0.0425762	0.999982	Gm11476
ENSMUSG00000109610	2.1552	-3.48449	1.74584	-1.99588	0.0459466	0.999982	Gm7432
ENSMUSG00000063531	2.15438	-3.48423	1.74595	-1.99561	0.0459768	0.999982	Sema3e
ENSMUSG00000056025	2.1284	-3.47362	1.75908	-1.97468	0.0483044	0.999982	Clca3a1
ENSMUSG00000048794	3.9995	-3.47221	1.3796	-2.51683	0.0118417	0.931751	Cfap100
ENSMUSG00000040026	175.839	-3.21993	0.760308	-4.23503	2.28517e-05	0.00891216	Saa3
ENSMUSG00000029380	44.453	-3.17409	0.513078	-6.18637	6.15672e-10	4.0908e-07	Cxcl1
ENSMUSG00000026822	9.12532	-3.0369	0.935989	-3.24459	0.0011762	0.24254	Lcn2
ENSMUSG00000039217	2.83286	-2.91924	1.48721	-1.96289	0.0496585	0.999982	Il18
ENSMUSG00000025746	5.04283	-2.7595	1.21221	-2.27642	0.0228207	0.999982	Il6
ENSMUSG00000050914	55.3039	-2.75676	0.350331	-7.869	3.57477e-15	4.27542e-12	Ankrd37
ENSMUSG00000031637	40.8822	-2.65012	0.417865	-6.34206	2.26719e-10	1.69473e-07	Lrp2bp
ENSMUSG00000050578	3.46952	-2.58899	1.27501	-2.03056	0.0422994	0.999982	Mmp13
ENSMUSG00000032531	17.4718	-2.49666	0.585793	-4.26202	2.02586e-05	0.00826	Amotl2
ENSMUSG00000044258	6.14786	-2.35886	0.984719	-2.39546	0.0165993	0.999982	Ctla2a
ENSMUSG00000025161	575.171	-2.34005	0.122997	-19.0253	1.0531e-80	9.44631e-77	Slc16a3
ENSMUSG00000060594	4.8143	-2.26797	1.051	-2.15791	0.0309348	0.999982	Layn
ENSMUSG00000031778	6.68133	-2.26141	0.978275	-2.31163	0.0207981	0.999982	Cx3cl1
ENSMUSG00000052353	29.2408	-2.01474	0.430639	-4.67848	2.89006e-06	0.00136441	Cemip
ENSMUSG00000078566	137.691	-1.96802	0.211557	-9.30259	1.37071e-20	2.23551e-17	Bnip3
ENSMUSG00000032487	40.9183	-1.95016	0.453155	-4.30352	1.68106e-05	0.00718051	Ptgs2
ENSMUSG00000000056	151.059	-1.92566	0.195087	-9.87076	5.57395e-23	1.11107e-19	Narf
ENSMUSG00000028527	272.545	-1.91268	0.152182	-12.5684	3.15168e-36	1.13082e-32	Ak4
ENSMUSG00000059994	9.36944	-1.90269	0.737136	-2.58118	0.00984619	0.853336	Fcrl1
ENSMUSG00000020303	63.2187	-1.79157	0.297966	-6.01267	1.82492e-09	1.16925e-06	Stc2
ENSMUSG00000045312	7.10149	-1.72416	0.832747	-2.07045	0.0384104	0.999982	Lhfpl2
ENSMUSG00000019846	7.06089	-1.71855	0.838756	-2.04893	0.0404689	0.999982	Lama4
ENSMUSG00000034205	17.4601	-1.71068	0.562338	-3.04209	0.00234941	0.383168	Loxl2
ENSMUSG00000019929	94.2424	-1.67256	0.298727	-5.59895	2.1565e-08	1.17235e-05	Dcn
ENSMUSG00000026043	159.384	-1.65977	0.490439	-3.38425	0.000713725	0.168477	Col3a1
ENSMUSG00000027750	133.192	-1.65444	0.648176	-2.55245	0.0106969	0.896739	Postn
ENSMUSG00000097989	9.22007	-1.58632	0.76028	-2.08649	0.0369342	0.999982	Gm4335
ENSMUSG00000038451	24.2891	-1.43405	0.450468	-3.18347	0.00145522	0.28088	Spsb2
ENSMUSG00000037440	37.1212	-1.42937	0.369431	-3.8691	0.000109238	0.0343812	Vnn1
ENSMUSG00000056427	18.0942	-1.40928	0.519805	-2.71117	0.00670472	0.737931	Slit3
ENSMUSG00000023456	5961.57	-1.4062	0.0708596	-19.8449	1.22088e-87	2.19027e-83	Tpi1
ENSMUSG00000023951	47.2931	-1.36623	0.338409	-4.03724	5.40849e-05	0.0186593	Vegfa
ENSMUSG00000004098	12.4394	-1.36566	0.692494	-1.97208	0.0485999	0.999982	Col5a3
ENSMUSG00000033316	14.1618	-1.36527	0.572803	-2.3835	0.0171491	0.999982	Galnt9
ENSMUSG00000038235	13.2867	-1.31418	0.603637	-2.1771	0.0294733	0.999982	F11r
ENSMUSG00000032332	103.504	-1.28171	0.511355	-2.50649	0.0121935	0.942893	Col12a1
ENSMUSG00000040152	233.712	-1.27683	0.386093	-3.30705	0.000942851	0.205297	Thbs1
ENSMUSG00000020826	14.1962	-1.21783	0.581858	-2.093	0.0363495	0.999982	Nos2
ENSMUSG00000020277	2078.3	-1.20627	0.0712222	-16.9367	2.41463e-64	1.44395e-60	Pfkl
ENSMUSG00000049233	13.1792	-1.19753	0.61016	-1.96265	0.049687	0.999982	Apoo-ps
ENSMUSG00000056836	16.2571	-1.17764	0.581439	-2.02539	0.0428275	0.999982	Pin4-ps
ENSMUSG00000072941	19.8847	-1.16213	0.557526	-2.08443	0.0371207	0.999982	Sod3
ENSMUSG00000015568	36.1033	-1.08958	0.395121	-2.75758	0.00582318	0.682797	Lpl
ENSMUSG00000091269	28.6242	-1.04793	0.465426	-2.25156	0.02435	0.999982	Gm6682
ENSMUSG00000022816	69.8998	-1.0218	0.347106	-2.94377	0.00324239	0.479335	Fstl1

## Sheet: Enriched DN pathway in KO
Term	Overlap	P-value	Adjusted P-value	Old P-value	Old Adjusted P-value	Odds Ratio	Combined Score	Genes
IL-17 signaling pathway	1994-05-01	5.95082e-06	0.000515077	0	0	22.3101	268.435	IL6;MMP13;LCN2;CXCL1;PTGS2
Amoebiasis	5/102	8.88064e-06	0.000515077	0	0	20.4619	238.005	IL6;COL3A1;NOS2;LAMA4;CXCL1
Legionellosis	1957-04-01	1.81414e-05	0.000701466	0	0	29.4369	321.372	IL6;BNIP3;IL18;CXCL1
Rheumatoid arthritis	1993-04-01	0.000124618	0.00318996	0	0	17.4981	157.313	IL6;IL18;CXCL1;VEGFA
African trypanosomiasis	1937-03-01	0.000143097	0.00318996	0	0	33.7856	299.07	IL6;LAMA4;IL18
Viral protein interaction with cytokine and cytokine receptor	4/100	0.000164998	0.00318996	0	0	16.2165	141.239	IL6;IL18;CXCL1;CX3CL1
HIF-1 signaling pathway	4/109	0.000229847	0.00369811	0	0	14.8198	124.162	IL6;PFKL;NOS2;VEGFA
TNF signaling pathway	4/112	0.000255042	0.00369811	0	0	14.406	119.196	IL6;CXCL1;PTGS2;CX3CL1
Malaria	1950-03-01	0.000351954	0.0045363	0	0	24.4247	194.226	IL6;IL18;THBS1
Relaxin signaling pathway	4/129	0.000436747	0.00506626	0	0	12.4361	96.2075	COL3A1;MMP13;NOS2;VEGFA
Kaposi sarcoma-associated herpesvirus infection	4/193	0.00195236	0.0200931	0	0	8.19836	51.1473	IL6;CXCL1;PTGS2;VEGFA
Small cell lung cancer	1992-03-01	0.0020786	0.0200931	0	0	12.8712	79.4934	NOS2;LAMA4;PTGS2
AGE-RAGE signaling pathway in diabetic complications	3/100	0.00263534	0.0235154	0	0	11.8049	70.1064	IL6;COL3A1;VEGFA
Protein digestion and absorption	3/103	0.00286559	0.0237435	0	0	11.449	67.0339	COL3A1;COL5A3;COL12A1
Human cytomegalovirus infection	4/225	0.00339549	0.0262585	0	0	6.99991	39.7966	IL6;PTGS2;CX3CL1;VEGFA
Fructose and mannose metabolism	1933-02-01	0.00371196	0.0269117	0	0	24.241	135.658	PFKL;TPI1
Bladder cancer	1941-02-01	0.00568433	0.0387872	0	0	19.2608	99.579	THBS1;VEGFA
Cytokine-cytokine receptor interaction	4/295	0.0087689	0.0565107	0	0	5.29722	25.0905	IL6;IL18;CXCL1;CX3CL1
VEGF signaling pathway	1959-02-01	0.0114925	0.0648269	0	0	13.1665	58.8024	PTGS2;VEGFA
Human papillomavirus infection	4/331	0.0129574	0.0648269	0	0	4.7054	20.4501	LAMA4;PTGS2;THBS1;VEGFA
Cytosolic DNA-sensing pathway	1963-02-01	0.0130265	0.0648269	0	0	12.3006	53.3942	IL6;IL18
Tuberculosis	3/180	0.0133532	0.0648269	0	0	6.44329	27.8092	IL6;NOS2;IL18
NOD-like receptor signaling pathway	3/181	0.0135523	0.0648269	0	0	6.40676	27.5568	IL6;IL18;CXCL1
Inflammatory bowel disease	1965-02-01	0.0138252	0.0648269	0	0	11.909	50.9853	IL6;IL18
Glycolysis / Gluconeogenesis	1967-02-01	0.0146447	0.0648269	0	0	11.5414	48.747	PFKL;TPI1
Pathways in cancer	5/531	0.0151409	0.0648269	0	0	3.69183	15.4701	IL6;NOS2;LAMA4;PTGS2;VEGFA
Central carbon metabolism in cancer	1970-02-01	0.0159123	0.0648269	0	0	11.0305	45.6737	PFKL;SLC16A3
Epithelial cell signaling in Helicobacter pylori infection	1970-02-01	0.0159123	0.0648269	0	0	11.0305	45.6737	CXCL1;F11R
PI3K-Akt signaling pathway	4/354	0.0162067	0.0648269	0	0	4.39104	18.1013	IL6;LAMA4;THBS1;VEGFA
Focal adhesion	3/201	0.0178913	0.0649778	0	0	5.75379	23.15	LAMA4;THBS1;VEGFA
Alzheimer disease	4/369	0.0185796	0.0649778	0	0	4.20736	16.7692	IL6;NOS2;LPL;PTGS2
Pertussis	1976-02-01	0.0185829	0.0649778	0	0	10.1331	40.3856	IL6;NOS2
Proteoglycans in cancer	3/205	0.0188416	0.0649778	0	0	5.63871	22.3952	THBS1;DCN;VEGFA
Leishmaniasis	1977-02-01	0.0190452	0.0649778	0	0	9.99748	39.5994	NOS2;PTGS2
Lipid and atherosclerosis	3/215	0.0213386	0.0707221	0	0	5.37001	20.6597	IL6;IL18;CXCL1
ECM-receptor interaction	1988-02-01	0.0244435	0.0787624	0	0	8.71391	32.3407	LAMA4;THBS1
TGF-beta signaling pathway	1994-02-01	0.0276211	0.0865109	0	0	8.14315	29.2272	THBS1;DCN
Calcium signaling pathway	3/240	0.0283398	0.0865109	0	0	4.79747	17.0957	NOS2;MST1R;VEGFA
Chagas disease	2/102	0.032101	0.09411	0	0	7.48868	25.7526	IL6;NOS2
C-type lectin receptor signaling pathway	2/104	0.033263	0.09411	0	0	7.3411	24.984	IL6;PTGS2
NF-kappa B signaling pathway	2/104	0.033263	0.09411	0	0	7.3411	24.984	CXCL1;PTGS2
Toxoplasmosis	2/112	0.0380725	0.105153	0	0	6.80446	22.2388	NOS2;LAMA4
Thiamine metabolism	2023-01-15	0.040479	0.109199	0	0	26.3638	84.5478	AK4
FoxO signaling pathway	2/131	0.0504689	0.133054	0	0	5.79669	17.3112	IL6;BNIP3
MicroRNAs in cancer	3/310	0.0536251	0.137809	0	0	3.69043	10.7972	PTGS2;THBS1;VEGFA
Yersinia infection	2/137	0.0546483	0.137809	0	0	5.53739	16.0963	IL6;IL18
Pantothenate and CoA biosynthesis	2023-01-21	0.0562163	0.138747	0	0	18.4491	53.1066	VNN1
Arginine biosynthesis	2023-01-22	0.0588144	0.142135	0	0	17.5697	49.7813	NOS2
Tight junction	2/169	0.0788223	0.182664	0	0	4.4691	11.354	AMOTL2;F11R
Pentose phosphate pathway	2023-01-30	0.0793482	0.182664	0	0	12.7178	32.2256	PFKL
Influenza A	2/172	0.081236	0.182664	0	0	4.38957	11.0196	IL6;IL18
Galactose metabolism	2023-01-31	0.0818838	0.182664	0	0	12.2932	30.7632	PFKL
Axon guidance	2/182	0.0894445	0.195765	0	0	4.14361	10.0032	SEMA3E;SLIT3
Mucin type O-glycan biosynthesis	1936-01-01	0.0944592	0.202912	0	0	10.5344	24.8568	GALNT9
Chemokine signaling pathway	2/192	0.097889	0.206457	0	0	3.92354	9.11799	CXCL1;CX3CL1
Pathogenic Escherichia coli infection	2/197	0.102194	0.211687	0	0	3.82196	8.71745	IL6;IL18
Graft-versus-host disease	1942-01-01	0.109327	0.222489	0	0	8.99006	19.8987	IL6
Rap1 signaling pathway	2/210	0.113626	0.227251	0	0	3.58073	7.78755	THBS1;VEGFA
Other types of O-glycan biosynthesis	1947-01-01	0.121533	0.238946	0	0	8.01087	16.8835	GALNT9
Intestinal immune network for IgA production	1948-01-01	0.123954	0.239645	0	0	7.84003	16.3687	IL6
Arginine and proline metabolism	1950-01-01	0.128778	0.240939	0	0	7.51927	15.412	NOS2
Cholesterol metabolism	1950-01-01	0.128778	0.240939	0	0	7.51927	15.412	LPL
Ovarian steroidogenesis	1951-01-01	0.13118	0.241537	0	0	7.36852	14.9668	PTGS2
Chemical carcinogenesis	2/239	0.140212	0.249834	0	0	3.13797	6.16486	PTGS2;VEGFA
Regulation of lipolysis in adipocytes	1955-01-01	0.140722	0.249834	0	0	6.82133	13.3764	PTGS2
Pathways of neurodegeneration	3/475	0.142147	0.249834	0	0	2.38017	4.64347	IL6;NOS2;PTGS2
Shigellosis	2/246	0.146821	0.254198	0	0	3.04686	5.84552	BNIP3;IL18
Salmonella infection	2/249	0.149674	0.255326	0	0	3.0094	5.71573	IL6;IL18
Arachidonic acid metabolism	1961-01-01	0.154843	0.256598	0	0	6.13735	11.4482	PTGS2
Glycerolipid metabolism	1961-01-01	0.154843	0.256598	0	0	6.13735	11.4482	LPL
GnRH secretion	1964-01-01	0.161818	0.264379	0	0	5.84421	10.6439	GNRH1
Mitophagy	1968-01-01	0.17103	0.275409	0	0	5.4942	9.70227	BNIP3
Renal cell carcinoma	1969-01-01	0.173318	0.275409	0	0	5.41313	9.48719	VEGFA
p53 signaling pathway	1973-01-01	0.182406	0.281853	0	0	5.11137	8.6971	THBS1
Inositol phosphate metabolism	1973-01-01	0.182406	0.281853	0	0	5.11137	8.6971	TPI1
PPAR signaling pathway	1974-01-01	0.184663	0.281853	0	0	5.0411	8.51555	LPL
Pancreatic cancer	1976-01-01	0.189157	0.284964	0	0	4.90617	8.16964	VEGFA
RNA degradation	1979-01-01	0.195854	0.29127	0	0	4.71676	7.69014	PFKL
Peroxisome	1982-01-01	0.202497	0.297337	0	0	4.54138	7.25273	NOS2
Hypertrophic cardiomyopathy	1990-01-01	0.219948	0.318924	0	0	4.1315	6.25661	IL6
GnRH signaling pathway	1993-01-01	0.226395	0.324219	0	0	3.99618	5.93622	GNRH1
Hematopoietic cell lineage	1999-01-01	0.239132	0.338284	0	0	3.75038	5.36581	IL6
Toll-like receptor signaling pathway	1/104	0.249589	0.343804	0	0	3.56742	4.95136	IL6
Parathyroid hormone synthesis, secretion and action	1/106	0.253732	0.343804	0	0	3.49912	4.79895	MMP13
Th17 cell differentiation	1/107	0.255795	0.343804	0	0	3.46593	4.72537	IL6
Glucagon signaling pathway	1/107	0.255795	0.343804	0	0	3.46593	4.72537	PFKL
Insulin resistance	1/108	0.257853	0.343804	0	0	3.43337	4.65347	IL6
Serotonergic synapse	1/113	0.268057	0.352017	0	0	3.27927	4.31733	PTGS2
Leukocyte transendothelial migration	1/114	0.270082	0.352017	0	0	3.25008	4.25446	F11R
AMPK signaling pathway	1/120	0.282112	0.362148	0	0	3.08528	3.90426	PFKL
Thyroid hormone signaling pathway	1/121	0.284099	0.362148	0	0	3.05941	3.85007	PFKL
Platelet activation	1/124	0.290025	0.365683	0	0	2.98434	3.69399	COL3A1
Purine metabolism	1/129	0.299794	0.373937	0	0	2.86704	3.45381	AK4
Apelin signaling pathway	1/137	0.315152	0.381412	0	0	2.6973	3.11458	NOS2
Autophagy	1/137	0.315152	0.381412	0	0	2.6973	3.11458	BNIP3
Fluid shear stress and atherosclerosis	1/139	0.31894	0.381412	0	0	2.65794	3.03737	VEGFA
Measles	1/139	0.31894	0.381412	0	0	2.65794	3.03737	IL6
Cell adhesion molecules	1/148	0.33573	0.393381	0	0	2.49408	2.72216	F11R
Retrograde endocannabinoid signaling	1/148	0.33573	0.393381	0	0	2.49408	2.72216	PTGS2
Phagosome	1/152	0.343062	0.394528	0	0	2.42752	2.59707	THBS1
Oxytocin signaling pathway	1/154	0.346698	0.394528	0	0	2.39555	2.53761	PTGS2
Non-alcoholic fatty liver disease	1/155	0.348508	0.394528	0	0	2.37987	2.50861	IL6
Cellular senescence	1/156	0.350314	0.394528	0	0	2.3644	2.48008	IL6
Hepatitis B	1/162	0.361045	0.398868	0	0	2.27559	2.31827	IL6
JAK-STAT signaling pathway	1/162	0.361045	0.398868	0	0	2.27559	2.31827	IL6
Transcriptional misregulation in cancer	1/192	0.412143	0.451024	0	0	1.91526	1.69766	IL6
Epstein-Barr virus infection	1/202	0.428266	0.461696	0	0	1.81905	1.54257	IL6
Diabetic cardiomyopathy	1/203	0.429855	0.461696	0	0	1.80996	1.52816	COL3A1
Human T-cell leukemia virus 1 infection	1/219	0.454686	0.483886	0	0	1.67576	1.32074	IL6
Coronavirus disease	1/232	0.474077	0.495432	0	0	1.58041	1.17959	IL6
Ras signaling pathway	1/232	0.474077	0.495432	0	0	1.58041	1.17959	VEGFA
Prion disease	1/273	0.530904	0.549865	0	0	1.33939	0.848068	IL6
MAPK signaling pathway	1/294	0.55763	0.572435	0	0	1.24207	0.725441	VEGFA
Neuroactive ligand-receptor interaction	1/341	0.612145	0.622885	0	0	1.06781	0.524066	GNRH1
Amyotrophic lateral sclerosis	1/364	0.636362	0.641896	0	0	0.99898	0.451526	NOS2
Herpes simplex virus 1 infection	1/498	0.750609	0.750609	0	0	0.724644	0.207879	IL6

## Sheet: P0.05 upregulated (2-fold, 37)
ems	baseMean	log2FoldChange	lfcSE	stat	pvalue	padj	SYMBOL
ENSMUSG00000106969	19.1441	1.02649	0.511514	2.00677	0.0447742	0.999982	NA
ENSMUSG00000021614	91.0406	1.0392	0.250411	4.14998	3.32509e-05	0.0121739	Vcan
ENSMUSG00000079092	23.7971	1.04153	0.463665	2.2463	0.0246846	0.999982	Prl2c2
ENSMUSG00000027797	141.815	1.0762	0.271682	3.96123	7.45658e-05	0.024322	Dclk1
ENSMUSG00000075122	45.3634	1.1171	0.332853	3.35614	0.000790389	0.181789	Cd80
ENSMUSG00000086370	16.4852	1.13587	0.565466	2.00873	0.0445657	0.999982	Ftx
ENSMUSG00000026817	17.665	1.16248	0.527967	2.2018	0.0276797	0.999982	Ak1
ENSMUSG00000000308	16.7279	1.18819	0.542697	2.18942	0.0285663	0.999982	Ckmt1
ENSMUSG00000006179	12.2506	1.22097	0.615334	1.98424	0.0472287	0.999982	Prss16
ENSMUSG00000035517	20.3166	1.24604	0.493992	2.52239	0.0116561	0.925268	Tdrd7
ENSMUSG00000020961	13.6441	1.25213	0.620879	2.01671	0.0437256	0.999982	Ston2
ENSMUSG00000069516	11.5938	1.3021	0.654459	1.98958	0.046637	0.999982	Lyz2
ENSMUSG00000033644	11.9576	1.35596	0.660319	2.05349	0.0400252	0.999982	Piwil2
ENSMUSG00000073000	18.95	1.39643	0.514063	2.71646	0.00659843	0.731064	Ppp1r36dn
ENSMUSG00000039238	20.2759	1.43406	0.527944	2.7163	0.00660159	0.731064	Zfp750
ENSMUSG00000000552	40.9628	1.57896	0.3549	4.44903	8.6257e-06	0.00377427	Zfp385a
ENSMUSG00000113238	6.16616	1.85526	0.911956	2.03437	0.041914	0.999982	NA
ENSMUSG00000030149	6.09371	2.04631	1.03865	1.97016	0.0488196	0.999982	Klrk1
ENSMUSG00000026831	7.0934	2.31802	0.929608	2.49355	0.0126473	0.965426	Pierce1
ENSMUSG00000034156	3.46034	2.5677	1.29219	1.9871	0.0469117	0.999982	Tspoap1
ENSMUSG00000068086	7.55706	2.69834	1.04614	2.57934	0.009899	0.853789	Cyp2d9
ENSMUSG00000034792	10.3151	2.77606	0.801245	3.46468	0.000530854	0.132271	Gna15
ENSMUSG00000020723	3.96429	2.78105	1.26059	2.20616	0.027373	0.999982	Cacng4
ENSMUSG00000109008	2.98642	2.9925	1.50497	1.98842	0.0467653	0.999982	NA
ENSMUSG00000082476	3.1854	3.05822	1.5106	2.02451	0.0429182	0.999982	Gm12242
ENSMUSG00000117202	3.1289	3.07007	1.49237	2.05717	0.0396694	0.999982	Gm9349
ENSMUSG00000074629	3.10291	3.0765	1.49585	2.05669	0.0397158	0.999982	NA
ENSMUSG00000047591	2.27766	3.56889	1.72068	2.07412	0.0380681	0.999982	Mafa
ENSMUSG00000108832	2.4547	3.67838	1.68266	2.18605	0.0288119	0.999982	NA
ENSMUSG00000006411	2.83239	3.89361	1.63062	2.38781	0.0169489	0.999982	Nectin4
ENSMUSG00000090891	1.49024	4.01813	1.96912	2.04058	0.0412931	0.999982	D6Ertd527e
ENSMUSG00000048387	1.49877	4.02494	1.96679	2.04645	0.0407124	0.999982	Osr1
ENSMUSG00000024680	1.62421	4.14633	2.08469	1.98895	0.0467072	0.999982	Ms4a2
ENSMUSG00000103587	8.39944	4.59153	1.21118	3.79094	0.000150078	0.0448732	Gm38326
ENSMUSG00000023000	2.47694	4.75179	1.69212	2.8082	0.00498199	0.633879	Dhh
ENSMUSG00000019737	2.48916	4.75781	1.72475	2.75855	0.00580577	0.682797	Syne4
ENSMUSG00000102298	5.55774	4.91262	1.44162	3.4077	0.000655118	0.156704	NA

## Sheet: UP gene list excluded NA (31)
ems	baseMean	log2FoldChange	lfcSE	stat	pvalue	padj	SYMBOL
ENSMUSG00000021614	91.0406	1.0392	0.250411	4.14998	3.32509e-05	0.0121739	Vcan
ENSMUSG00000079092	23.7971	1.04153	0.463665	2.2463	0.0246846	0.999982	Prl2c2
ENSMUSG00000027797	141.815	1.0762	0.271682	3.96123	7.45658e-05	0.024322	Dclk1
ENSMUSG00000075122	45.3634	1.1171	0.332853	3.35614	0.000790389	0.181789	Cd80
ENSMUSG00000086370	16.4852	1.13587	0.565466	2.00873	0.0445657	0.999982	Ftx
ENSMUSG00000026817	17.665	1.16248	0.527967	2.2018	0.0276797	0.999982	Ak1
ENSMUSG00000000308	16.7279	1.18819	0.542697	2.18942	0.0285663	0.999982	Ckmt1
ENSMUSG00000006179	12.2506	1.22097	0.615334	1.98424	0.0472287	0.999982	Prss16
ENSMUSG00000035517	20.3166	1.24604	0.493992	2.52239	0.0116561	0.925268	Tdrd7
ENSMUSG00000020961	13.6441	1.25213	0.620879	2.01671	0.0437256	0.999982	Ston2
ENSMUSG00000069516	11.5938	1.3021	0.654459	1.98958	0.046637	0.999982	Lyz2
ENSMUSG00000033644	11.9576	1.35596	0.660319	2.05349	0.0400252	0.999982	Piwil2
ENSMUSG00000073000	18.95	1.39643	0.514063	2.71646	0.00659843	0.731064	Ppp1r36dn
ENSMUSG00000039238	20.2759	1.43406	0.527944	2.7163	0.00660159	0.731064	Zfp750
ENSMUSG00000000552	40.9628	1.57896	0.3549	4.44903	8.6257e-06	0.00377427	Zfp385a
ENSMUSG00000030149	6.09371	2.04631	1.03865	1.97016	0.0488196	0.999982	Klrk1
ENSMUSG00000026831	7.0934	2.31802	0.929608	2.49355	0.0126473	0.965426	Pierce1
ENSMUSG00000034156	3.46034	2.5677	1.29219	1.9871	0.0469117	0.999982	Tspoap1
ENSMUSG00000068086	7.55706	2.69834	1.04614	2.57934	0.009899	0.853789	Cyp2d9
ENSMUSG00000034792	10.3151	2.77606	0.801245	3.46468	0.000530854	0.132271	Gna15
ENSMUSG00000020723	3.96429	2.78105	1.26059	2.20616	0.027373	0.999982	Cacng4
ENSMUSG00000082476	3.1854	3.05822	1.5106	2.02451	0.0429182	0.999982	Gm12242
ENSMUSG00000117202	3.1289	3.07007	1.49237	2.05717	0.0396694	0.999982	Gm9349
ENSMUSG00000047591	2.27766	3.56889	1.72068	2.07412	0.0380681	0.999982	Mafa
ENSMUSG00000006411	2.83239	3.89361	1.63062	2.38781	0.0169489	0.999982	Nectin4
ENSMUSG00000090891	1.49024	4.01813	1.96912	2.04058	0.0412931	0.999982	D6Ertd527e
ENSMUSG00000048387	1.49877	4.02494	1.96679	2.04645	0.0407124	0.999982	Osr1
ENSMUSG00000024680	1.62421	4.14633	2.08469	1.98895	0.0467072	0.999982	Ms4a2
ENSMUSG00000103587	8.39944	4.59153	1.21118	3.79094	0.000150078	0.0448732	Gm38326
ENSMUSG00000023000	2.47694	4.75179	1.69212	2.8082	0.00498199	0.633879	Dhh
ENSMUSG00000019737	2.48916	4.75781	1.72475	2.75855	0.00580577	0.682797	Syne4

## Sheet: Enriched up pathway in KO
Term	Overlap	P-value	Adjusted P-value	Old P-value	Old Adjusted P-value	Odds Ratio	Combined Score	Genes
Cell adhesion molecules	2/148	0.0219807	0.214269	0	0	9.36372	35.7469	VCAN;CD80
Thiamine metabolism	2023-01-15	0.0230072	0.214269	0	0	47.5119	179.212	AK1
Maturity onset diabetes of the young	2023-01-26	0.0395528	0.214269	0	0	26.592	85.8953	MAFA
Asthma	2023-01-31	0.0469836	0.214269	0	0	22.1544	67.7473	MS4A2
Allograft rejection	1938-01-01	0.0572933	0.214269	0	0	17.9568	51.3486	CD80
Graft-versus-host disease	1942-01-01	0.063136	0.214269	0	0	16.2016	44.7564	CD80
Type I diabetes mellitus	1943-01-01	0.0645912	0.214269	0	0	15.8151	43.3282	CD80
Type II diabetes mellitus	1946-01-01	0.0689437	0.214269	0	0	14.7585	39.4712	MAFA
Intestinal immune network for IgA production	1948-01-01	0.0718344	0.214269	0	0	14.1291	37.2074	CD80
Malaria	1950-01-01	0.0747165	0.214269	0	0	13.551	35.1521	KLRK1
Autoimmune thyroid disease	1953-01-01	0.0790233	0.214269	0	0	12.7673	32.4036	CD80
Hedgehog signaling pathway	1956-01-01	0.0833108	0.214269	0	0	12.0691	29.9938	DHH
Viral myocarditis	1960-01-01	0.0889974	0.214269	0	0	11.2486	27.212	CD80
Fc epsilon RI signaling pathway	1968-01-01	0.100268	0.214269	0	0	9.90149	22.7725	MS4A2
Adherens junction	1971-01-01	0.10446	0.214269	0	0	9.47571	21.4052	NECTIN4
Arrhythmogenic right ventricular cardiomyopathy	1977-01-01	0.112787	0.214269	0	0	8.725	19.0402	CACNG4
Cardiac muscle contraction	1987-01-01	0.126498	0.214269	0	0	7.70659	15.9336	CACNG4
Hypertrophic cardiomyopathy	1990-01-01	0.130572	0.214269	0	0	7.44569	15.1582	CACNG4
Rheumatoid arthritis	1993-01-01	0.134627	0.214269	0	0	7.20181	14.4414	CD80
Dilated cardiomyopathy	1996-01-01	0.138664	0.214269	0	0	6.97333	13.7772	CACNG4
Amoebiasis	1/102	0.146682	0.214269	0	0	6.5571	12.5863	GNA15
Chagas disease	1/102	0.146682	0.214269	0	0	6.5571	12.5863	GNA15
Toll-like receptor signaling pathway	1/104	0.149339	0.214269	0	0	6.42913	12.2252	CD80
Sphingolipid signaling pathway	1/119	0.169012	0.223352	0	0	5.60763	9.96916	MS4A2
Purine metabolism	1/129	0.181882	0.223352	0	0	5.16693	8.80651	AK1
Relaxin signaling pathway	1/129	0.181882	0.223352	0	0	5.16693	8.80651	GNA15
Natural killer cell mediated cytotoxicity	1/131	0.184432	0.223352	0	0	5.08692	8.59931	KLRK1
Systemic lupus erythematosus	1/135	0.189511	0.223352	0	0	4.93408	8.2069	CD80
Phospholipase D signaling pathway	1/148	0.205805	0.226974	0	0	4.49478	7.10548	MS4A2
Adrenergic signaling in cardiomyocytes	1/150	0.208283	0.226974	0	0	4.434	6.95632	CACNG4
Oxytocin signaling pathway	1/154	0.213218	0.226974	0	0	4.31721	6.672	CACNG4
Calcium signaling pathway	1/240	0.312389	0.322151	0	0	2.75174	3.20167	GNA15
MAPK signaling pathway	1/294	0.368356	0.368356	0	0	2.23845	2.23556	CACNG4
