# Supplementary material for: HIF1α-glycolysis engages activation-induced cell death to drive IFN-γ induction in hypoxic T cells
Source: Research Square preprint supplement (doi:10.21203/rs.3.rs-3830704/v1), 2024-01-12
Supplement: Supplementary file 2 [file 5e89fe5b927cf1087d839405.xlsx]

## Sheet: WT vs KO_pvalue-All
ems	baseMean	log2FoldChange	lfcSE	stat	pvalue	padj	SYMBOL
ENSMUSG00000003153	4996.33	-4.62292	0.0900289	-51.3493	0	0	Slc2a3
ENSMUSG00000020277	4625.92	-2.80162	0.0722778	-38.7618	0	0	Pfkl
ENSMUSG00000023456	13380.7	-3.09261	0.0718664	-43.0328	0	0	Tpi1
ENSMUSG00000025161	4372.25	-4.17553	0.0912208	-45.7739	0	0	Slc16a3
ENSMUSG00000028527	1466.1	-4.63557	0.117216	-39.5474	0	0	Ak4
ENSMUSG00000078566	1142.51	-4.97496	0.133224	-37.3428	3.31539e-305	8.12879e-302	Bnip3
ENSMUSG00000028645	3325.63	-2.36336	0.0696837	-33.9155	3.93347e-252	8.26646e-249	Slc2a1
ENSMUSG00000063524	36242.7	-2.44455	0.0750412	-32.5761	8.95388e-233	1.64651e-229	Eno1
ENSMUSG00000109881	773.413	-5.04135	0.158918	-31.7229	7.50154e-221	1.22617e-217	NA
ENSMUSG00000062070	27493	-1.89619	0.0648364	-29.2458	5.08186e-188	7.47592e-185	Pgk1
ENSMUSG00000032294	34308.7	-1.92851	0.0665934	-28.9595	2.12771e-184	2.84552e-181	Pkm
ENSMUSG00000011752	4555.11	-1.78394	0.0630217	-28.3067	2.85661e-176	3.50197e-173	Pgam1
ENSMUSG00000030695	21572.6	-2.08891	0.0753737	-27.714	4.7383e-169	5.36194e-166	Aldoa
ENSMUSG00000026628	814.92	-3.20717	0.115809	-27.6935	8.37044e-169	8.79554e-166	Atf3
ENSMUSG00000058966	3909.25	-2.08312	0.0770607	-27.0321	6.19555e-161	6.07618e-158	Tlcd3b
ENSMUSG00000025791	1334.38	-2.44789	0.092341	-26.5092	7.59301e-155	6.9813e-152	Pgm1
ENSMUSG00000035105	4952.41	-4.86445	0.184536	-26.3604	3.89954e-153	3.37448e-150	Egln3
ENSMUSG00000021831	2338.37	-2.00155	0.0764159	-26.1929	3.20484e-151	2.61925e-148	Ero1a
ENSMUSG00000031765	599.018	-3.74974	0.144039	-26.0329	2.10289e-149	1.62819e-146	Mt1
ENSMUSG00000000628	2515.3	-1.98153	0.0762326	-25.9932	5.9132e-149	4.34945e-146	Hk2
ENSMUSG00000037280	1270.36	-2.21922	0.0861957	-25.7463	3.54974e-146	2.48668e-143	Galnt6
ENSMUSG00000037820	531.027	-5.12805	0.202795	-25.2868	4.46048e-141	2.98264e-138	Tgm2
ENSMUSG00000019916	1868.35	-1.94201	0.0779814	-24.9035	6.81808e-137	4.3609e-134	P4ha1
ENSMUSG00000006494	1325.23	-2.07478	0.0838568	-24.7419	3.78804e-135	2.32191e-132	Pdk1
ENSMUSG00000063229	37702.7	-1.73734	0.0738929	-23.5116	3.10254e-122	1.82566e-119	Ldha
ENSMUSG00000036427	12898.9	-1.74525	0.0753955	-23.1479	1.52606e-118	8.63457e-116	Gpi1
ENSMUSG00000022051	1623.03	-1.88703	0.0830284	-22.7276	2.39144e-114	1.30298e-111	Bnip3l
ENSMUSG00000073421	357.441	-5.41887	0.241261	-22.4606	1.00713e-111	5.29141e-109	H2-Ab1
ENSMUSG00000057666	46286.6	-1.58973	0.0719202	-22.1041	2.88911e-108	1.46558e-105	Gapdh
ENSMUSG00000032231	1054.99	-2.30531	0.106581	-21.6297	9.43189e-104	4.62508e-101	Anxa2
ENSMUSG00000031987	2205.94	-1.67387	0.0777174	-21.5379	6.87911e-103	3.26447e-100	Egln1
ENSMUSG00000049109	653.322	-2.74792	0.128841	-21.328	6.2439e-101	2.87044e-98	Themis
ENSMUSG00000037012	4955.27	-1.38345	0.0654604	-21.1342	3.85769e-99	1.71971e-96	Hk1
ENSMUSG00000003955	2134.51	-1.66182	0.0788042	-21.088	1.02585e-98	4.43863e-96	Fam162a
ENSMUSG00000056671	600.044	-2.56205	0.124051	-20.6532	9.13614e-95	3.84005e-92	Prelid2
ENSMUSG00000085505	569.595	-2.33179	0.115304	-20.223	6.1463e-91	2.51162e-88	NA
ENSMUSG00000020572	3183.54	-1.38844	0.0687674	-20.1904	1.18925e-90	4.7284e-88	Nampt
ENSMUSG00000005125	445.37	-2.92909	0.149253	-19.6251	9.44656e-86	3.65706e-83	Ndrg1
ENSMUSG00000021420	2207.2	-2.17107	0.117427	-18.4887	2.54509e-76	9.6002e-74	Fars2
ENSMUSG00000038412	1151.97	-1.78782	0.097916	-18.2587	1.76433e-74	6.48876e-72	Higd1a
ENSMUSG00000053931	1840.14	-1.35751	0.0748316	-18.1408	1.51729e-73	5.44411e-71	Cnn3
ENSMUSG00000031762	241.039	-3.42385	0.191762	-17.8547	2.65825e-71	9.31084e-69	Mt2
ENSMUSG00000031609	539.032	-1.94304	0.114002	-17.044	3.87268e-65	1.32491e-62	Sap30
ENSMUSG00000026773	1273.15	-1.48239	0.0877872	-16.8861	5.69037e-64	1.87705e-61	Pfkfb3
ENSMUSG00000018906	215.514	-3.40723	0.201783	-16.8856	5.74177e-64	1.87705e-61	P4ha2
ENSMUSG00000023175	4531.63	-1.15499	0.0689411	-16.7533	5.36093e-63	1.71445e-60	Bsg
ENSMUSG00000090062	406.048	-2.11605	0.127518	-16.5941	7.68303e-62	2.40479e-59	NA
ENSMUSG00000028211	786.566	1.67019	0.101323	16.4838	4.80048e-61	1.47125e-58	Trp53inp1
ENSMUSG00000050914	191.472	-4.23415	0.257518	-16.4421	9.55083e-61	2.86739e-58	Ankrd37
ENSMUSG00000069094	1821.8	-1.34089	0.0816179	-16.4289	1.18848e-60	3.49676e-58	Pde7a
ENSMUSG00000023034	3549.33	1.53571	0.0940686	16.3254	6.51318e-60	1.87873e-57	Nr4a1
ENSMUSG00000023951	286.349	-2.57356	0.158095	-16.2786	1.40139e-59	3.96459e-57	Vegfa
ENSMUSG00000110588	231.434	-3.0357	0.186529	-16.2747	1.49369e-59	4.14598e-57	NA
ENSMUSG00000042650	3592.4	-1.03556	0.063879	-16.2113	4.19608e-59	1.14312e-56	Alkbh5
ENSMUSG00000033307	8418.97	-1.22344	0.0756611	-16.17	8.21517e-59	2.19733e-56	Mif
ENSMUSG00000056290	647.26	2.21814	0.137791	16.0979	2.64002e-58	6.93523e-56	Ms4a4b
ENSMUSG00000092283	182.885	-5.02856	0.313029	-16.0642	4.54429e-58	1.17283e-55	NA
ENSMUSG00000007817	1763.37	-1.39762	0.0883677	-15.816	2.41335e-56	6.12118e-54	Zmiz1
ENSMUSG00000031637	152.877	-5.06952	0.324788	-15.6087	6.35485e-55	1.58451e-52	Lrp2bp
ENSMUSG00000056962	1066.31	-1.3747	0.0892189	-15.4081	1.44323e-53	3.53856e-51	Jmjd6
ENSMUSG00000033105	1270.27	-1.54325	0.100933	-15.2898	8.93709e-53	2.1553e-50	Lss
ENSMUSG00000031239	2832.57	1.44926	0.0962891	15.0511	3.39374e-51	8.05247e-49	Itm2a
ENSMUSG00000025986	876.21	-1.36425	0.090827	-15.0203	5.40293e-51	1.26163e-48	Slc39a10
ENSMUSG00000032011	1333.46	-1.7506	0.116966	-14.9668	1.21015e-50	2.78165e-48	Thy1
ENSMUSG00000024892	489.814	-1.85961	0.124267	-14.9647	1.24872e-50	2.82614e-48	Pcx
ENSMUSG00000021453	273.097	-2.34977	0.157216	-14.9462	1.64948e-50	3.6766e-48	Gadd45g
ENSMUSG00000046157	877.836	-1.41323	0.0945731	-14.9433	1.72356e-50	3.78437e-48	Tmem229b
ENSMUSG00000024378	2412.88	-1.12614	0.0758673	-14.8436	7.65487e-50	1.65604e-47	Stard4
ENSMUSG00000030718	1145.15	-1.25705	0.0847758	-14.8279	9.66494e-50	2.06059e-47	Ppme1
ENSMUSG00000032688	2953.36	-1.30976	0.088846	-14.7419	3.46774e-49	7.2877e-47	Malt1
ENSMUSG00000024014	2085.21	-1.37614	0.093793	-14.6722	9.72068e-49	2.0141e-46	Pim1
ENSMUSG00000028793	1423.95	-1.22749	0.0847409	-14.4852	1.5038e-47	3.07255e-45	Rnf19b
ENSMUSG00000043421	287.341	-2.69048	0.185882	-14.4742	1.76443e-47	3.55569e-45	Hilpda
ENSMUSG00000020766	1908.98	-1.46535	0.10164	-14.417	4.04335e-47	8.03807e-45	Galk1
ENSMUSG00000104913	406.08	-2.0287	0.140839	-14.4044	4.85378e-47	9.52053e-45	NA
ENSMUSG00000041075	149.706	-3.49321	0.244205	-14.3044	2.05467e-46	3.97715e-44	Fzd7
ENSMUSG00000053470	828.358	-1.39046	0.0978055	-14.2166	7.22736e-46	1.3808e-43	Kdm3a
ENSMUSG00000004936	1113.39	-1.24796	0.087944	-14.1904	1.05104e-45	1.98228e-43	Map2k1
ENSMUSG00000052713	234.115	-2.34852	0.166322	-14.1203	2.8459e-45	5.29951e-43	Zfp608
ENSMUSG00000041168	2419.62	-1.04423	0.0745464	-14.0077	1.39771e-44	2.57021e-42	Lonp1
ENSMUSG00000017390	122.703	-4.33601	0.311472	-13.9211	4.71892e-44	8.57038e-42	Aldoc
ENSMUSG00000003824	303.604	-2.57718	0.188982	-13.6371	2.40826e-42	4.32047e-40	Syce2
ENSMUSG00000024924	116.758	-4.44919	0.327662	-13.5786	5.36518e-42	9.50929e-40	Vldlr
ENSMUSG00000071068	592.182	-1.57962	0.116596	-13.5478	8.16543e-42	1.43002e-39	Treml2
ENSMUSG00000018909	507.999	-1.75867	0.131026	-13.4223	4.47779e-41	7.74973e-39	Arrb1
ENSMUSG00000052117	137.405	-3.1246	0.232882	-13.4171	4.79988e-41	8.21058e-39	D630039A03Rik
ENSMUSG00000017314	253.504	-2.16006	0.16114	-13.4048	5.66593e-41	9.52303e-39	Mpp2
ENSMUSG00000043415	414.885	1.7577	0.131128	13.4044	5.6966e-41	9.52303e-39	Otud1
ENSMUSG00000024201	457.348	-1.61602	0.121231	-13.3301	1.54729e-40	2.55754e-38	Kdm4b
ENSMUSG00000096917	370.957	-1.92864	0.144793	-13.32	1.77071e-40	2.89433e-38	2500002B13Rik
ENSMUSG00000000056	210.56	-2.33595	0.175999	-13.2726	3.34004e-40	5.39949e-38	Narf
ENSMUSG00000004319	1326.37	-1.29361	0.097658	-13.2463	4.73931e-40	7.57825e-38	Clcn3
ENSMUSG00000004040	3573.45	-0.950748	0.0718106	-13.2397	5.17866e-40	8.19175e-38	Stat3
ENSMUSG00000020027	1330.95	-1.41788	0.107358	-13.2071	7.98669e-40	1.24992e-37	Socs2
ENSMUSG00000078922	576.888	-1.60256	0.122337	-13.0995	3.31219e-39	5.12901e-37	Tgtp1
ENSMUSG00000054871	254.174	2.20385	0.170821	12.9015	4.41334e-38	6.76299e-36	Tmem158
ENSMUSG00000028549	480.299	-1.4975	0.116095	-12.8989	4.56611e-38	6.92495e-36	Itgb3bp
ENSMUSG00000021486	6148.81	-0.883285	0.0690606	-12.79	1.86478e-37	2.79926e-35	Prelid1
ENSMUSG00000064341	14011.6	0.889942	0.0697616	12.7569	2.85292e-37	4.23933e-35	ND1
ENSMUSG00000002799	142.689	-2.83328	0.222575	-12.7295	4.05373e-37	5.96345e-35	Jag2
ENSMUSG00000042207	986.303	-1.11026	0.0885352	-12.5403	4.49436e-36	6.54619e-34	Kdm5b
ENSMUSG00000025130	7585.48	-0.758442	0.0608745	-12.4591	1.2474e-35	1.79907e-33	P4hb
ENSMUSG00000064193	302.515	-2.11449	0.170115	-12.4298	1.80125e-35	2.57264e-33	NA
ENSMUSG00000046794	121.352	-3.06669	0.247036	-12.414	2.19487e-35	3.10468e-33	Ppp1r3b
ENSMUSG00000105813	537.351	-1.3175	0.106194	-12.4066	2.40732e-35	3.37276e-33	NA
ENSMUSG00000038550	91.6702	-4.36432	0.35231	-12.3877	3.04569e-35	4.2269e-33	Ciart
ENSMUSG00000057329	1684.73	-1.40103	0.113793	-12.3121	7.7984e-35	1.07217e-32	Bcl2
ENSMUSG00000019189	1366.41	-1.01399	0.0828114	-12.2446	1.79625e-34	2.44673e-32	Rnf145
ENSMUSG00000118051	184.444	-2.58187	0.213059	-12.1181	8.46843e-34	1.14293e-31	Gm8714
ENSMUSG00000027381	502.591	1.33738	0.110727	12.0782	1.37734e-33	1.842e-31	Bcl2l11
ENSMUSG00000091479	155.141	-2.50266	0.207512	-12.0603	1.7118e-33	2.26868e-31	NA
ENSMUSG00000050370	91.3999	-5.22526	0.435767	-11.991	3.96283e-33	5.20511e-31	Ch25h
ENSMUSG00000026358	1084.49	-1.54146	0.12946	-11.9068	1.09036e-32	1.4195e-30	Rgs1
ENSMUSG00000020014	115.632	-2.86538	0.240857	-11.8966	1.23276e-32	1.5908e-30	Cfap54
ENSMUSG00000032578	1670.93	-0.972005	0.0817238	-11.8938	1.27486e-32	1.63082e-30	Cish
ENSMUSG00000022346	3603.19	-0.893697	0.0753126	-11.8665	1.76688e-32	2.24074e-30	Myc
ENSMUSG00000035637	413.312	-1.63852	0.138305	-11.8472	2.22563e-32	2.79839e-30	Grhpr
ENSMUSG00000024665	295.436	-2.2331	0.188521	-11.8454	2.27362e-32	2.83451e-30	Fads2
ENSMUSG00000028965	3298.37	-0.832094	0.0705122	-11.8007	3.86996e-32	4.78411e-30	Tnfrsf9
ENSMUSG00000037400	2722.43	-0.988087	0.0837466	-11.7985	3.97189e-32	4.86921e-30	Atp11b
ENSMUSG00000037818	133.904	-2.54953	0.216189	-11.7931	4.23707e-32	5.15137e-30	Abhd18
ENSMUSG00000001441	1979.01	-0.871003	0.0743224	-11.7193	1.01567e-31	1.22471e-29	Npepps
ENSMUSG00000020326	3990.49	1.0575	0.0904218	11.6952	1.34875e-31	1.61313e-29	Ccng1
ENSMUSG00000046031	223.169	-1.93504	0.165741	-11.6751	1.70891e-31	2.0274e-29	Calhm6
ENSMUSG00000024556	2366.77	-0.856585	0.0734934	-11.6553	2.15707e-31	2.53862e-29	Me2
ENSMUSG00000064247	246.678	-1.92391	0.165608	-11.6172	3.36921e-31	3.93368e-29	Plcxd1
ENSMUSG00000022906	754.318	-1.28025	0.110329	-11.6039	3.93769e-31	4.56121e-29	Parp9
ENSMUSG00000053846	239.455	-1.95905	0.169083	-11.5863	4.83412e-31	5.55584e-29	Lipg
ENSMUSG00000059895	1365.99	1.21971	0.1055	11.5613	6.47175e-31	7.3803e-29	Ptp4a3
ENSMUSG00000042351	1047.78	-1.12341	0.0977949	-11.4874	1.52681e-30	1.72776e-28	Grap2
ENSMUSG00000091649	350.606	1.60875	0.140132	11.4803	1.65751e-30	1.86134e-28	Phf11b
ENSMUSG00000028270	11201.6	-1.03887	0.0907755	-11.4444	2.50864e-30	2.79581e-28	Gbp2
ENSMUSG00000097125	692.597	-1.37484	0.120493	-11.4101	3.72139e-30	4.1162e-28	NA
ENSMUSG00000020108	1690.01	-1.21102	0.106187	-11.4047	3.96265e-30	4.35034e-28	Ddit4
ENSMUSG00000082292	621.99	-1.48502	0.130519	-11.3778	5.39415e-30	5.87803e-28	NA
ENSMUSG00000041801	410.311	1.95676	0.173243	11.2949	1.39129e-29	1.50494e-27	Phlda3
ENSMUSG00000024066	268.467	-1.88406	0.166885	-11.2896	1.47752e-29	1.58655e-27	Xdh
ENSMUSG00000041220	370.967	-1.45209	0.12894	-11.2617	2.02746e-29	2.1613e-27	Elovl6
ENSMUSG00000020142	169.154	2.31155	0.205521	11.2473	2.38915e-29	2.52854e-27	Slc1a4
ENSMUSG00000029275	519.223	-1.42732	0.127413	-11.2023	3.97146e-29	4.17315e-27	Gfi1
ENSMUSG00000032009	1083.13	1.11721	0.100281	11.1409	7.93405e-29	8.27786e-27	Sesn3
ENSMUSG00000027333	317.653	-1.79906	0.161566	-11.1352	8.45967e-29	8.7641e-27	Smox
ENSMUSG00000078921	600.851	-1.42201	0.127898	-11.1183	1.02166e-28	1.05102e-26	Tgtp2
ENSMUSG00000020646	85.9607	-3.83727	0.346335	-11.0797	1.57448e-28	1.60849e-26	Mboat2
ENSMUSG00000076617	539.87	1.44753	0.13067	11.0777	1.60878e-28	1.63219e-26	Ighm
ENSMUSG00000001348	301.155	-1.56343	0.141728	-11.0312	2.70137e-28	2.72191e-26	Acp5
ENSMUSG00000027634	717.412	1.05565	0.0957509	11.025	2.89506e-28	2.89723e-26	Ndrg3
ENSMUSG00000028961	2291.69	-0.89186	0.0815405	-10.9376	7.61637e-28	7.57057e-26	Pgd
ENSMUSG00000111394	106.05	-3.15135	0.288642	-10.9178	9.47207e-28	9.35192e-26	NA
ENSMUSG00000043445	1228.88	-1.03524	0.0950278	-10.894	1.23079e-27	1.20708e-25	Pgp
ENSMUSG00000078920	2312.89	-0.840061	0.0771363	-10.8906	1.27782e-27	1.2449e-25	Ifi47
ENSMUSG00000021185	272.435	2.12882	0.195895	10.8671	1.65315e-27	1.59996e-25	Dglucy
ENSMUSG00000025027	1154.69	-0.916446	0.0849228	-10.7915	3.775e-27	3.62967e-25	Xpnpep1
ENSMUSG00000038179	465.753	-1.40405	0.130232	-10.7812	4.22308e-27	4.03414e-25	Slamf7
ENSMUSG00000044005	196.677	-1.86457	0.173225	-10.7639	5.09832e-27	4.8388e-25	Gls2
ENSMUSG00000003746	2085.65	1.09845	0.102573	10.709	9.23367e-27	8.70747e-25	Man1a
ENSMUSG00000037405	520.218	-1.42998	0.133951	-10.6754	1.32631e-26	1.23539e-24	Icam1
ENSMUSG00000060600	589.706	1.43053	0.134003	10.6754	1.32684e-26	1.23539e-24	Eno3
ENSMUSG00000070407	677.585	-1.17334	0.110842	-10.5857	3.47158e-26	3.21198e-24	Hs3st3b1
ENSMUSG00000075284	3575.4	-0.706114	0.066772	-10.575	3.89184e-26	3.56265e-24	Wipf1
ENSMUSG00000033083	664.834	1.39005	0.131449	10.5748	3.89903e-26	3.56265e-24	Tbc1d4
ENSMUSG00000005447	160.121	-2.05067	0.194344	-10.5517	4.98694e-26	4.52857e-24	Pafah1b3
ENSMUSG00000030103	2779.39	-0.930419	0.0884246	-10.5222	6.82875e-26	6.16305e-24	Bhlhe40
ENSMUSG00000031167	3619.24	0.722922	0.0688999	10.4924	9.36607e-26	8.40148e-24	Rbm3
ENSMUSG00000031167	3619.24	0.722922	0.0688999	10.4924	9.36607e-26	8.40148e-24	Rbm3-ps
ENSMUSG00000105504	1989.19	-1.00681	0.096335	-10.4511	1.44772e-25	1.29075e-23	Gbp5
ENSMUSG00000004043	1506.08	-0.855802	0.0819972	-10.437	1.68101e-25	1.48972e-23	Stat5a
ENSMUSG00000025203	8246.11	-1.95963	0.188941	-10.3717	3.33648e-25	2.9391e-23	Scd2
ENSMUSG00000020611	4326.24	-0.685466	0.0663568	-10.33	5.15542e-25	4.50683e-23	Gna13
ENSMUSG00000004558	361.519	-1.57094	0.152081	-10.3296	5.17745e-25	4.50683e-23	Ndrg2
ENSMUSG00000090126	95.6519	-2.72522	0.264368	-10.3084	6.4541e-25	5.58508e-23	NA
ENSMUSG00000022108	2192.83	0.791564	0.0768033	10.3064	6.59364e-25	5.67246e-23	Itm2b
ENSMUSG00000049804	111.856	-2.44721	0.237664	-10.2969	7.2754e-25	6.22258e-23	Armcx4
ENSMUSG00000031557	1509.74	-0.908294	0.0885743	-10.2546	1.12845e-24	9.59571e-23	Plekha2
ENSMUSG00000021733	1414.98	-0.878368	0.0859278	-10.2222	1.57782e-24	1.33399e-22	Slc4a7
ENSMUSG00000031530	1590.77	1.07729	0.106034	10.1599	2.99534e-24	2.51797e-22	Dusp4
ENSMUSG00000026770	7524.85	-0.679914	0.0669442	-10.1564	3.10273e-24	2.59342e-22	Il2ra
ENSMUSG00000038451	73.5776	-3.42656	0.339016	-10.1074	5.12458e-24	4.25919e-22	Spsb2
ENSMUSG00000021910	1988.48	-0.752842	0.0745044	-10.1047	5.26754e-24	4.35342e-22	Nisch
ENSMUSG00000046034	1280.25	-0.970552	0.0964081	-10.0671	7.7207e-24	6.34521e-22	Otulin
ENSMUSG00000001663	78.6828	-3.24792	0.322697	-10.0649	7.89471e-24	6.45217e-22	Gstt1
ENSMUSG00000039997	403.045	1.41097	0.140459	10.0454	9.6261e-24	7.82374e-22	Ifi203
ENSMUSG00000022439	1187.34	0.878663	0.0875801	10.0327	1.0951e-23	8.85166e-22	Parvg
ENSMUSG00000027078	155.7	-1.9018	0.189775	-10.0214	1.22813e-23	9.8727e-22	Ube2l6
ENSMUSG00000021067	597.425	-1.0982	0.1099	-9.99275	1.63968e-23	1.31094e-21	Sav1
ENSMUSG00000025790	632.63	-1.31623	0.132499	-9.93393	2.96355e-23	2.35658e-21	Slco3a1
ENSMUSG00000031585	886.112	-0.918215	0.0927	-9.90524	3.95036e-23	3.1244e-21	Gtf2e2
ENSMUSG00000034799	262.715	-1.45361	0.147296	-9.86861	5.69476e-23	4.47998e-21	Unc13a
ENSMUSG00000055148	170.639	1.76913	0.179683	9.84584	7.14426e-23	5.59038e-21	Klf2
ENSMUSG00000037411	108.59	-2.23481	0.227147	-9.83861	7.67668e-23	5.97522e-21	Serpine1
ENSMUSG00000029672	1346.34	0.807464	0.0825383	9.7829	1.33339e-22	1.0324e-20	Fam3c
ENSMUSG00000029254	411.2	1.25428	0.128255	9.7796	1.3776e-22	1.06104e-20	Stap1
ENSMUSG00000020120	1652.85	-0.854986	0.0875409	-9.7667	1.56459e-22	1.19878e-20	Plek
ENSMUSG00000022186	5273.75	0.703649	0.0722745	9.73578	2.12176e-22	1.61726e-20	Oxct1
ENSMUSG00000086241	178.733	-1.8169	0.186828	-9.72498	2.35962e-22	1.7893e-20	4930483K19Rik
ENSMUSG00000098871	1258.47	-1.10818	0.114619	-9.66836	4.10901e-22	3.09988e-20	Mir6381
ENSMUSG00000023243	305.516	-1.43515	0.148476	-9.66592	4.20841e-22	3.15867e-20	Kcnk5
ENSMUSG00000031805	2836.41	-0.646766	0.0670179	-9.65063	4.8853e-22	3.6481e-20	Jak3
ENSMUSG00000032114	206.312	-1.71962	0.178432	-9.6374	5.55799e-22	4.12947e-20	Slc37a4
ENSMUSG00000045414	568.937	-1.12976	0.117564	-9.60971	7.27534e-22	5.37827e-20	Dipk2a
ENSMUSG00000006567	58.8103	-4.45576	0.465247	-9.57719	9.97183e-22	7.33478e-20	Atp7b
ENSMUSG00000024805	1291.14	-0.865612	0.090731	-9.54042	1.42253e-21	1.04113e-19	Pcgf5
ENSMUSG00000013275	791.361	-0.922853	0.0973022	-9.4844	2.43776e-21	1.77534e-19	Slc41a1
ENSMUSG00000039114	4343.28	-2.60034	0.274286	-9.48039	2.53336e-21	1.83588e-19	Nrn1
ENSMUSG00000032316	768.549	-0.883839	0.0932547	-9.47769	2.59967e-21	1.8747e-19	Clk3
ENSMUSG00000037278	1074.54	-0.840992	0.0887923	-9.47145	2.75986e-21	1.9805e-19	Tmem97
ENSMUSG00000040723	628.653	0.940536	0.099939	9.4111	4.90955e-21	3.50604e-19	Rcsd1
ENSMUSG00000021273	955.272	-0.968983	0.103345	-9.37623	6.8375e-21	4.85925e-19	Fdft1
ENSMUSG00000057335	524.721	-1.04464	0.111562	-9.36371	7.69833e-21	5.44471e-19	Cep170
ENSMUSG00000021796	225.685	-1.54803	0.165804	-9.33651	9.95633e-21	6.97699e-19	Bmpr1a
ENSMUSG00000018914	59.2667	-3.63622	0.389464	-9.33647	9.95967e-21	6.97699e-19	Il3
ENSMUSG00000032193	1000.58	-0.934638	0.10015	-9.33239	1.03514e-20	7.21705e-19	Ldlr
ENSMUSG00000022443	16495.7	0.677124	0.0730983	9.26319	1.98408e-20	1.37679e-18	Myh9
ENSMUSG00000037419	182.78	1.95441	0.211007	9.26231	2.00061e-20	1.38174e-18	Endod1
ENSMUSG00000020101	1148.04	1.17004	0.126647	9.23864	2.49641e-20	1.7161e-18	Vsir
ENSMUSG00000022351	1590.26	-0.700575	0.0758714	-9.23371	2.61413e-20	1.78867e-18	Sqle
ENSMUSG00000041481	58.7838	-3.68181	0.398845	-9.23118	2.67674e-20	1.82304e-18	Serpina3g
ENSMUSG00000022508	93.7292	2.24443	0.243404	9.221	2.94345e-20	1.99545e-18	Bcl6
ENSMUSG00000090272	438.457	1.28779	0.139821	9.21025	3.25368e-20	2.19564e-18	Mndal
ENSMUSG00000023832	646.192	-1.11931	0.121555	-9.20828	3.31403e-20	2.22615e-18	Acat2
ENSMUSG00000059743	1991.91	-1.02672	0.111668	-9.19434	3.77293e-20	2.52289e-18	Fdps
ENSMUSG00000026199	146.422	-1.80603	0.196521	-9.19	3.92823e-20	2.61485e-18	Ankzf1
ENSMUSG00000034522	466.861	-1.31337	0.143128	-9.17622	4.46502e-20	2.95878e-18	Zfp395
ENSMUSG00000003500	938.004	-0.857494	0.0936035	-9.16093	5.14537e-20	3.39433e-18	Impdh1
ENSMUSG00000093930	4227.26	-0.821596	0.089821	-9.14704	5.85161e-20	3.84299e-18	Hmgcs1
ENSMUSG00000037225	502.262	-1.08722	0.118968	-9.13873	6.31889e-20	4.13143e-18	Fgf2
ENSMUSG00000040699	4370.53	0.66267	0.0726793	9.11773	7.67155e-20	4.99364e-18	Limd2
ENSMUSG00000004665	3598.18	0.699334	0.0767447	9.11247	8.05253e-20	5.21853e-18	Cnn2
ENSMUSG00000025026	860.546	0.860256	0.0944696	9.10617	8.53434e-20	5.50652e-18	Add3
ENSMUSG00000035828	1184.09	-0.780985	0.0858415	-9.09799	9.20201e-20	5.91139e-18	Pim3
ENSMUSG00000028278	306.252	-1.29823	0.142827	-9.08958	9.94192e-20	6.35894e-18	Rragd
ENSMUSG00000003541	81.6872	-2.67901	0.294757	-9.08888	1.0006e-19	6.36697e-18	Ier3
ENSMUSG00000031133	881.899	1.00564	0.11065	9.0885	1.0041e-19	6.36697e-18	Arhgef6
ENSMUSG00000005374	630.987	-0.9086	0.100051	-9.08135	1.07238e-19	6.7707e-18	Tbl2
ENSMUSG00000021214	188.126	-1.86436	0.205339	-9.07945	1.09127e-19	6.86055e-18	Akr1c18
ENSMUSG00000023067	1058.35	1.03937	0.114849	9.04992	1.43073e-19	8.95639e-18	Cdkn1a
ENSMUSG00000021686	1934.32	0.658166	0.0728492	9.03464	1.64549e-19	1.02571e-17	Ap3b1
ENSMUSG00000038291	903.975	-0.847589	0.0938677	-9.02961	1.72278e-19	1.06511e-17	Snx25
ENSMUSG00000056749	204.993	-1.58347	0.175364	-9.02959	1.72317e-19	1.06511e-17	Nfil3
ENSMUSG00000027663	484.867	1.36348	0.151039	9.02734	1.75894e-19	1.08267e-17	Zmat3
ENSMUSG00000025025	268.695	-1.32738	0.147402	-9.00519	2.15286e-19	1.31961e-17	Mxi1
ENSMUSG00000028970	701.659	1.012	0.112698	8.97976	2.71362e-19	1.65644e-17	Abcb1b
ENSMUSG00000040276	355.588	1.24453	0.138648	8.97616	2.80376e-19	1.70439e-17	Pacsin1
ENSMUSG00000057457	47.4641	-4.60766	0.515103	-8.94512	3.71556e-19	2.24936e-17	Phex
ENSMUSG00000032053	376.626	2.74611	0.307253	8.93763	3.97598e-19	2.39716e-17	Pou2af1
ENSMUSG00000064345	6841.27	0.571695	0.0639953	8.9334	4.13125e-19	2.4806e-17	ND2
ENSMUSG00000032018	1030.47	-0.767866	0.085967	-8.9321	4.17984e-19	2.49958e-17	Sc5d
ENSMUSG00000018899	2387.82	-0.698667	0.0783887	-8.91285	4.97379e-19	2.96233e-17	Irf1
ENSMUSG00000021133	999.812	0.796601	0.0893892	8.9116	5.02995e-19	2.9837e-17	Susd6
ENSMUSG00000045294	1529.06	-0.916326	0.103097	-8.88797	6.22368e-19	3.67697e-17	Insig1
ENSMUSG00000017677	865.762	-0.79544	0.0896284	-8.87487	7.00144e-19	4.11993e-17	Wsb1
ENSMUSG00000012819	212.763	-1.7475	0.197645	-8.84162	9.43383e-19	5.52913e-17	Cdh23
ENSMUSG00000033161	14084	0.548941	0.0621275	8.83572	9.94598e-19	5.80616e-17	Atp1a1
ENSMUSG00000049932	2002.45	0.746975	0.0845781	8.83177	1.03034e-18	5.99105e-17	H2ax
ENSMUSG00000022797	10388.3	-0.643199	0.072872	-8.82642	1.08076e-18	6.24906e-17	Tfrc
ENSMUSG00000055188	1078.63	0.81966	0.092867	8.82617	1.08321e-18	6.24906e-17	Rbm3os
ENSMUSG00000005696	365.524	-1.22794	0.139353	-8.81173	1.23226e-18	7.08115e-17	Sh2d1a
ENSMUSG00000032374	221.965	-1.52193	0.172915	-8.80159	1.34892e-18	7.72138e-17	Plod2
ENSMUSG00000030798	460.85	1.00285	0.113966	8.79954	1.37379e-18	7.83327e-17	Cd37
ENSMUSG00000036526	576.025	1.01227	0.115292	8.78004	1.63416e-18	9.2819e-17	Card11
ENSMUSG00000022639	152.098	-1.93441	0.220749	-8.76296	1.90195e-18	1.07614e-16	NA
ENSMUSG00000059040	191.824	-1.8987	0.216732	-8.76059	1.94239e-18	1.09481e-16	Eno1b
ENSMUSG00000090570	819.553	-0.933502	0.106635	-8.75417	2.05616e-18	1.15451e-16	NA
ENSMUSG00000053398	4724.46	0.810274	0.0925893	8.75127	2.10963e-18	1.18003e-16	Phgdh
ENSMUSG00000061983	12763.4	0.627362	0.0721099	8.70009	3.31632e-18	1.84797e-16	Rps12
ENSMUSG00000037999	355.759	1.1666	0.134223	8.69152	3.57617e-18	1.98525e-16	Arap2
ENSMUSG00000031438	83.5807	-2.33914	0.269859	-8.66802	4.39681e-18	2.43164e-16	Rnf128
ENSMUSG00000035356	409.722	-1.16644	0.134676	-8.66106	4.67391e-18	2.5752e-16	Nfkbiz
ENSMUSG00000033434	261.89	-1.30331	0.150569	-8.65593	4.88916e-18	2.68375e-16	Gtpbp6
ENSMUSG00000031827	4684.65	0.77066	0.089216	8.63813	5.71391e-18	3.12481e-16	Cotl1
ENSMUSG00000022707	217.322	-1.38541	0.161523	-8.57715	9.72556e-18	5.29899e-16	Gbe1
ENSMUSG00000020128	429.794	-0.978781	0.114259	-8.56632	1.06844e-17	5.79995e-16	Vps54
ENSMUSG00000056888	663.299	0.84871	0.099104	8.56383	1.09179e-17	5.9049e-16	Glipr1
ENSMUSG00000114934	1466.76	-0.809265	0.094583	-8.55614	1.16709e-17	6.28904e-16	NA
ENSMUSG00000040524	836.036	-0.90201	0.106012	-8.50858	1.76076e-17	9.45348e-16	Zfp609
ENSMUSG00000075229	473.662	-0.950802	0.111755	-8.50793	1.7707e-17	9.4723e-16	Mix23
ENSMUSG00000027999	632.808	-0.973428	0.11442	-8.5075	1.77717e-17	9.47246e-16	Pla2g12a
ENSMUSG00000020919	2031.08	-0.699401	0.0822789	-8.50038	1.88977e-17	1.00362e-15	Stat5b
ENSMUSG00000028581	6779.85	0.555032	0.0654193	8.48423	2.17157e-17	1.14913e-15	Laptm5
ENSMUSG00000032440	675.897	0.8854	0.104436	8.47796	2.29182e-17	1.20842e-15	Tgfbr2
ENSMUSG00000064351	33829.5	0.506518	0.0598106	8.4687	2.48149e-17	1.30376e-15	COX1
ENSMUSG00000041654	327.747	1.2311	0.145582	8.45642	2.75722e-17	1.44347e-15	Slc39a11
ENSMUSG00000052837	5624.72	-0.660146	0.078256	-8.43572	3.29172e-17	1.71718e-15	Junb
ENSMUSG00000024548	144.196	-1.80445	0.214318	-8.41951	3.78058e-17	1.96524e-15	Setbp1
ENSMUSG00000048458	113.095	2.10923	0.251053	8.40153	4.40709e-17	2.28284e-15	Inka2
ENSMUSG00000044098	713.803	-0.824964	0.0982207	-8.39908	4.49979e-17	2.32268e-15	Rsbn1
ENSMUSG00000017493	1833.47	0.829406	0.0994257	8.34197	7.30637e-17	3.75818e-15	Igfbp4
ENSMUSG00000031453	391.666	1.20239	0.144326	8.3311	8.00948e-17	4.10549e-15	Rasa3
ENSMUSG00000020917	5125.65	-0.541609	0.0650432	-8.32691	8.29794e-17	4.23858e-15	Acly
ENSMUSG00000037060	50.3097	-3.04666	0.365961	-8.3251	8.42579e-17	4.28899e-15	Cavin3
ENSMUSG00000031328	6661.36	0.740463	0.0890083	8.31903	8.86844e-17	4.49874e-15	Flna
ENSMUSG00000021895	1984.32	0.730166	0.0878109	8.31521	9.15922e-17	4.62982e-15	Arhgef3
ENSMUSG00000045817	3284.39	-0.596208	0.0717044	-8.31481	9.18977e-17	4.62982e-15	Zfp36l2
ENSMUSG00000021595	5281.12	-0.548568	0.0660519	-8.3051	9.97377e-17	5.00765e-15	Nsun2
ENSMUSG00000045667	43.4027	-5.14932	0.620285	-8.30154	1.0277e-16	5.14234e-15	Smtnl2
ENSMUSG00000034765	1185.52	0.787499	0.095128	8.27831	1.24933e-16	6.23012e-15	Dusp5
ENSMUSG00000071722	594.589	-0.832074	0.100532	-8.27672	1.26612e-16	6.29253e-15	Spin4
ENSMUSG00000000078	1452.5	-0.67153	0.0812175	-8.2683	1.35884e-16	6.73059e-15	Klf6
ENSMUSG00000037855	107.093	1.97464	0.239593	8.24163	1.6988e-16	8.38625e-15	Zfp365
ENSMUSG00000024675	57.7252	2.6923	0.327331	8.22501	1.95173e-16	9.60264e-15	Ms4a4c
ENSMUSG00000005667	2776	0.872057	0.10608	8.22078	2.02185e-16	9.91449e-15	Mthfd2
ENSMUSG00000036918	632.364	0.826271	0.100565	8.21625	2.0996e-16	1.02615e-14	Ttc7
ENSMUSG00000032249	6977.18	-0.556056	0.0677845	-8.20329	2.33887e-16	1.13931e-14	Anp32a
ENSMUSG00000033220	4332.91	0.53606	0.0653695	8.20047	2.39452e-16	1.16257e-14	Rac2
ENSMUSG00000022885	1616.4	-2.15519	0.262922	-8.19706	2.46339e-16	1.19207e-14	St6gal1
ENSMUSG00000049878	498.368	-0.931718	0.113792	-8.18793	2.65767e-16	1.28187e-14	Rlf
ENSMUSG00000004846	865.988	-0.788796	0.0963466	-8.18707	2.67662e-16	1.28679e-14	Plod3
ENSMUSG00000091412	51.7802	-2.94873	0.36104	-8.1673	3.15358e-16	1.51115e-14	NA
ENSMUSG00000064370	16664.3	0.565251	0.0692331	8.16447	3.22861e-16	1.54208e-14	CYTB
ENSMUSG00000040339	340.66	1.11768	0.137	8.15822	3.39995e-16	1.61866e-14	Eeig2
ENSMUSG00000001467	4352.05	-0.671615	0.0823564	-8.15498	3.49232e-16	1.65728e-14	Cyp51
ENSMUSG00000035890	1087.04	-0.744554	0.0914906	-8.13804	4.01739e-16	1.90032e-14	Rnf126
ENSMUSG00000052889	349.599	1.07006	0.131778	8.1202	4.65399e-16	2.19439e-14	Prkcb
ENSMUSG00000007892	24807.9	0.603394	0.0743479	8.11582	4.82515e-16	2.26782e-14	Rplp1
ENSMUSG00000047898	752.127	-0.837755	0.103254	-8.11353	4.91684e-16	2.30356e-14	Ccr4
ENSMUSG00000087370	463.221	-0.981216	0.12128	-8.09049	5.94254e-16	2.77526e-14	Tmem170b
ENSMUSG00000028954	1788.9	-0.661946	0.0818482	-8.08748	6.09106e-16	2.83562e-14	Nub1
ENSMUSG00000039191	2284.98	-0.709643	0.0878642	-8.07659	6.66029e-16	3.09084e-14	Rbpj
ENSMUSG00000031297	47.5236	4.68505	0.580459	8.07128	6.95651e-16	3.21815e-14	Slc7a3
ENSMUSG00000028680	526.707	-0.907689	0.112748	-8.05062	8.23734e-16	3.79873e-14	Plk3
ENSMUSG00000017009	107.4	-1.90836	0.237109	-8.04845	8.38508e-16	3.85478e-14	Sdc4
ENSMUSG00000021127	4541.86	0.748597	0.0930204	8.04766	8.4389e-16	3.86743e-14	Zfp36l1
ENSMUSG00000038295	91.2879	-1.93633	0.241182	-8.02851	9.86629e-16	4.50755e-14	Atg9b
ENSMUSG00000040274	1401.37	-0.64679	0.0809482	-7.99018	1.34744e-15	6.13689e-14	Cdk6
ENSMUSG00000039676	88.9384	-2.07598	0.25986	-7.98884	1.36218e-15	6.18489e-14	Capsl
ENSMUSG00000040747	4936.6	0.647415	0.0810519	7.98766	1.37524e-15	6.22496e-14	Cd53
ENSMUSG00000031803	47.1552	-2.98746	0.374341	-7.98059	1.45638e-15	6.57202e-14	B3gnt3
ENSMUSG00000054006	253.92	-1.29994	0.163161	-7.96722	1.62278e-15	7.30054e-14	NA
ENSMUSG00000034379	385.005	-1.33979	0.168193	-7.96576	1.64209e-15	7.36485e-14	Wdr5b
ENSMUSG00000025572	1575.32	0.639983	0.0803674	7.96321	1.67631e-15	7.49552e-14	Tmc6
ENSMUSG00000032518	50512.5	0.52989	0.0665572	7.96143	1.70069e-15	7.58146e-14	Rpsa
ENSMUSG00000002227	372.668	-1.06106	0.133738	-7.93391	2.12345e-15	9.43747e-14	Mov10
ENSMUSG00000031134	538.734	0.889877	0.11232	7.92267	2.32455e-15	1.03001e-13	Rbmx
ENSMUSG00000024947	868.56	-0.735037	0.0928155	-7.91933	2.38788e-15	1.0549e-13	Men1
ENSMUSG00000029482	1066.5	-0.754879	0.095453	-7.90838	2.6076e-15	1.14852e-13	Aacs
ENSMUSG00000020048	6780.87	-0.465916	0.0589412	-7.90476	2.68456e-15	1.17888e-13	Hsp90b1
ENSMUSG00000024538	176.028	1.43608	0.182341	7.87578	3.38635e-15	1.48264e-13	Ppic
ENSMUSG00000034926	2944.17	-0.523769	0.0667254	-7.84962	4.17307e-15	1.82166e-13	Dhcr24
ENSMUSG00000097558	49.2052	-6.15938	0.785577	-7.84058	4.48462e-15	1.95187e-13	NA
ENSMUSG00000031924	2691.55	-0.542259	0.0693168	-7.82291	5.16163e-15	2.2399e-13	Cyb5b
ENSMUSG00000022283	48328.7	0.447682	0.0573194	7.81029	5.70558e-15	2.46867e-13	Pabpc1
ENSMUSG00000038900	18617.5	0.528871	0.0678104	7.79925	6.22739e-15	2.68654e-13	Rpl12
ENSMUSG00000022710	2817.34	-0.531083	0.0681156	-7.79679	6.35024e-15	2.73153e-13	Usp7
ENSMUSG00000030096	1691.05	-0.60973	0.0782285	-7.79422	6.48082e-15	2.77957e-13	Slc6a6
ENSMUSG00000043079	814.016	0.784837	0.100743	7.79046	6.67639e-15	2.85513e-13	Synpo
ENSMUSG00000020402	4136.06	-0.542094	0.069685	-7.7792	7.29826e-15	3.11202e-13	Vdac1
ENSMUSG00000033863	258.806	-1.2866	0.165403	-7.77862	7.33213e-15	3.11743e-13	Klf9
ENSMUSG00000029833	656.181	0.769836	0.0991897	7.76125	8.4097e-15	3.56528e-13	Trim24
ENSMUSG00000067206	65.3413	-2.48616	0.320352	-7.76072	8.44497e-15	3.56994e-13	Lrrc66
ENSMUSG00000026980	1041.6	-0.768755	0.0993177	-7.74036	9.91345e-15	4.1787e-13	Ly75
ENSMUSG00000021338	107.08	-1.71173	0.221577	-7.72522	1.11663e-14	4.69335e-13	Carmil1
ENSMUSG00000053113	164.658	-1.43225	0.186119	-7.69536	1.411e-14	5.91374e-13	Socs3
ENSMUSG00000018189	1476.58	-0.647318	0.0842538	-7.68295	1.55462e-14	6.49715e-13	Uchl5
ENSMUSG00000030748	1971.03	-0.571456	0.0743932	-7.68156	1.57168e-14	6.54987e-13	Il4ra
ENSMUSG00000029119	336.96	1.05888	0.137948	7.67597	1.64177e-14	6.8226e-13	Man2b2
ENSMUSG00000044197	161.65	-1.37181	0.178813	-7.67177	1.69639e-14	7.02976e-13	Gpr146
ENSMUSG00000064367	10371.3	0.555971	0.072505	7.66803	1.74653e-14	7.21719e-13	ND5
ENSMUSG00000047368	511.168	-0.947759	0.123612	-7.66721	1.75777e-14	7.24328e-13	Abhd17b
ENSMUSG00000017639	378.639	1.03854	0.135547	7.66181	1.83332e-14	7.53352e-13	Rab11fip4
ENSMUSG00000036894	568.314	0.833458	0.108855	7.65658	1.90943e-14	7.82442e-13	Rap2b
ENSMUSG00000002043	235.633	-1.25825	0.164356	-7.65565	1.92337e-14	7.85962e-13	Trappc6a
ENSMUSG00000000530	67.7127	-2.27626	0.297572	-7.64945	2.01841e-14	8.22514e-13	Acvrl1
ENSMUSG00000017418	1551.59	-0.731345	0.0958925	-7.62672	2.40806e-14	9.7859e-13	Arl5b
ENSMUSG00000045031	111.306	-1.61464	0.212023	-7.61538	2.62908e-14	1.06546e-12	Cetn4
ENSMUSG00000000552	46.3202	2.84689	0.374314	7.60563	2.83522e-14	1.14585e-12	Zfp385a
ENSMUSG00000024677	1207.35	0.697424	0.0917281	7.60316	2.88984e-14	1.16472e-12	Ms4a6b
ENSMUSG00000062825	21032.2	0.457199	0.0601423	7.60195	2.91707e-14	1.17248e-12	Actg1
ENSMUSG00000038963	519.118	-0.876192	0.115466	-7.5883	3.24142e-14	1.29931e-12	Slco4a1
ENSMUSG00000028657	1359.58	-0.836279	0.110346	-7.57866	3.49131e-14	1.39528e-12	Ppt1
ENSMUSG00000036155	381.278	1.30344	0.171995	7.57835	3.49983e-14	1.39528e-12	Mgat5
ENSMUSG00000001542	1592.48	-0.756081	0.0997938	-7.57643	3.55183e-14	1.41219e-12	Ell2
ENSMUSG00000078771	53.7446	2.64994	0.35103	7.54905	4.38441e-14	1.73852e-12	Evi2a
ENSMUSG00000062762	1346.7	0.737824	0.0978377	7.5413	4.65293e-14	1.84003e-12	Ei24
ENSMUSG00000030654	6083.25	0.50269	0.0667191	7.53443	4.90475e-14	1.93442e-12	Arl6ip1
ENSMUSG00000026249	172.811	1.32116	0.175728	7.51822	5.55262e-14	2.18408e-12	Serpine2
ENSMUSG00000060126	20787.2	0.477111	0.063522	7.51095	5.86993e-14	2.30273e-12	Tpt1
ENSMUSG00000029763	965.203	0.790211	0.105385	7.49834	6.46288e-14	2.5286e-12	Exoc4
ENSMUSG00000020577	919.322	0.940791	0.125548	7.49349	6.70669e-14	2.61703e-12	Tspan13
ENSMUSG00000028542	105.69	2.30782	0.308232	7.48726	7.03236e-14	2.73685e-12	Slc6a9
ENSMUSG00000073433	46.0647	-2.74946	0.367583	-7.47984	7.44133e-14	2.88837e-12	Arhgdig
ENSMUSG00000054611	1380.29	-0.635541	0.0850089	-7.47617	7.65201e-14	2.96233e-12	Kdm2a
ENSMUSG00000003031	448.765	-0.903032	0.120804	-7.47516	7.71078e-14	2.97725e-12	Cdkn1b
ENSMUSG00000042354	1187.42	-0.62181	0.0834401	-7.45217	9.18145e-14	3.53582e-12	Gnl3
ENSMUSG00000038642	546.756	1.09004	0.146286	7.45147	9.23024e-14	3.54533e-12	Ctss
ENSMUSG00000031644	405.41	-0.901655	0.121142	-7.44299	9.84345e-14	3.77101e-12	Nek1
ENSMUSG00000026421	1696.7	0.575194	0.0773046	7.44062	1.00216e-13	3.8293e-12	Csrp1
ENSMUSG00000026737	1062.24	0.654425	0.0880934	7.42877	1.09614e-13	4.17754e-12	Pip4k2a
ENSMUSG00000022657	136.326	1.536	0.206983	7.42093	1.16305e-13	4.42108e-12	Cd96
ENSMUSG00000025647	5428.33	0.459125	0.0618759	7.42009	1.17039e-13	4.43751e-12	Shisa5
ENSMUSG00000063015	3884.78	0.554713	0.0749271	7.40337	1.32768e-13	5.02094e-12	Ccni
ENSMUSG00000024063	2012.29	0.593475	0.0802095	7.39906	1.37152e-13	5.17343e-12	Lbh
ENSMUSG00000031381	258.277	-1.05233	0.142341	-7.39302	1.43527e-13	5.40007e-12	Piga
ENSMUSG00000020788	1426.49	0.656436	0.0888309	7.38973	1.4713e-13	5.5215e-12	Atp2a3
ENSMUSG00000087221	679.841	0.721651	0.0977649	7.38149	1.56525e-13	5.85913e-12	NA
ENSMUSG00000019986	463.208	1.0676	0.144693	7.37834	1.60269e-13	5.98407e-12	Ahi1
ENSMUSG00000031751	1678.7	0.547048	0.0742551	7.36715	1.74313e-13	6.49193e-12	Amfr
ENSMUSG00000033487	319.752	-0.98081	0.133146	-7.36643	1.75263e-13	6.51083e-12	Fndc3a
ENSMUSG00000020454	2234.07	-0.648082	0.0880044	-7.3642	1.78209e-13	6.60362e-12	Eif4enif1
ENSMUSG00000111856	101.921	-1.75825	0.239653	-7.33663	2.19038e-13	8.09615e-12	NA
ENSMUSG00000029385	378.449	-1.10852	0.151127	-7.335	2.21722e-13	8.17483e-12	Ccng2
ENSMUSG00000082424	112.153	-1.77006	0.241377	-7.33316	2.24783e-13	8.26695e-12	Gm13292
ENSMUSG00000025656	286.995	-1.08058	0.147364	-7.33276	2.25455e-13	8.27101e-12	Arhgef9
ENSMUSG00000058446	1496.9	-0.603122	0.0823624	-7.32278	2.42888e-13	8.88839e-12	Znrf2
ENSMUSG00000093661	170.107	-1.28759	0.176182	-7.3083	2.70547e-13	9.87597e-12	Eif4e3
ENSMUSG00000003865	281.278	-1.26463	0.173258	-7.2991	2.897e-13	1.0549e-11	Gys1
ENSMUSG00000021066	267.774	-1.07258	0.147051	-7.29393	3.01045e-13	1.0935e-11	Atl1
ENSMUSG00000025809	3767.29	-0.483702	0.0663895	-7.28582	3.19729e-13	1.1585e-11	Itgb1
ENSMUSG00000027030	3051.53	-0.737818	0.101371	-7.27839	3.37823e-13	1.22106e-11	Stk39
ENSMUSG00000013663	818.78	0.758372	0.104359	7.26697	3.67639e-13	1.32557e-11	Pten
ENSMUSG00000010067	248.084	-1.12587	0.154981	-7.26453	3.74324e-13	1.34479e-11	Rassf1
ENSMUSG00000036832	33.987	-3.42605	0.471624	-7.26436	3.74798e-13	1.34479e-11	Lpar3
ENSMUSG00000049577	1859.52	0.722509	0.0995142	7.26037	3.8604e-13	1.38176e-11	Zfpm1
ENSMUSG00000024781	430.397	0.840243	0.115827	7.25427	4.03844e-13	1.44038e-11	Lipa
ENSMUSG00000022587	2103.39	0.705935	0.0973155	7.25409	4.04376e-13	1.44038e-11	Ly6e
ENSMUSG00000031299	2820.11	0.498215	0.06871	7.25098	4.1378e-13	1.46819e-11	Pdha1
ENSMUSG00000041115	96.2203	-1.74646	0.240863	-7.25084	4.1418e-13	1.46819e-11	Iqsec2
ENSMUSG00000022372	2705.34	0.494048	0.0681546	7.24893	4.20066e-13	1.48548e-11	Sla
ENSMUSG00000011884	1649.41	0.543036	0.0749759	7.2428	4.39513e-13	1.55052e-11	Gltp
ENSMUSG00000032092	45.0537	-2.86576	0.395961	-7.2375	4.57045e-13	1.60851e-11	Mpzl2
ENSMUSG00000020228	610.033	-0.73876	0.102185	-7.22966	4.84215e-13	1.70007e-11	Helb
ENSMUSG00000059518	532.462	-0.780823	0.108029	-7.22792	4.90465e-13	1.71791e-11	Znhit1
ENSMUSG00000082314	105.403	-1.68794	0.233785	-7.22003	5.19767e-13	1.81622e-11	Gm13296
ENSMUSG00000037172	697.09	-0.853966	0.118305	-7.21837	5.26147e-13	1.83416e-11	Dennd11
ENSMUSG00000021756	812.991	0.871364	0.120735	7.21716	5.30839e-13	1.84614e-11	Il6st
ENSMUSG00000030247	73.2134	-1.99598	0.276703	-7.21343	5.4561e-13	1.89303e-11	Kcnj8
ENSMUSG00000049502	870.028	-0.820989	0.113856	-7.21075	5.56439e-13	1.92606e-11	Dtx3l
ENSMUSG00000035171	255.701	-1.09275	0.151726	-7.20213	5.928e-13	2.04711e-11	1110059E24Rik
ENSMUSG00000035171	255.701	-1.09275	0.151726	-7.20213	5.928e-13	2.04711e-11	Gm54192
ENSMUSG00000017715	558.6	-0.779093	0.108283	-7.19496	6.24776e-13	2.15248e-11	Pgs1
ENSMUSG00000001281	1721.54	0.550878	0.0765834	7.19318	6.32996e-13	2.1757e-11	Itgb7
ENSMUSG00000021820	365.863	-0.872542	0.121384	-7.18826	6.56245e-13	2.25036e-11	Camk2g
ENSMUSG00000012848	13948.1	0.611512	0.0852054	7.17692	7.12982e-13	2.43923e-11	Rps5
ENSMUSG00000008384	344.345	-0.982741	0.137021	-7.17218	7.38119e-13	2.51936e-11	Sertad1
ENSMUSG00000055805	2522.81	0.524454	0.073139	7.17066	7.46395e-13	2.54172e-11	Fmnl1
ENSMUSG00000029221	484.303	-0.802631	0.112024	-7.16482	7.78867e-13	2.64617e-11	Slc30a9
ENSMUSG00000037795	518.07	-0.847006	0.118243	-7.16329	7.87651e-13	2.66985e-11	N4bp2
ENSMUSG00000027829	428.389	-0.868211	0.121268	-7.15942	8.10184e-13	2.73991e-11	Ccnl1
ENSMUSG00000023571	91.6147	-1.69529	0.237078	-7.15077	8.6293e-13	2.9116e-11	C1qtnf12
ENSMUSG00000005886	1412.2	0.840954	0.117762	7.14112	9.25746e-13	3.11639e-11	Ncoa2
ENSMUSG00000015337	342.827	-0.916971	0.12867	-7.12656	1.02909e-12	3.45639e-11	Endog
ENSMUSG00000035133	219.208	-1.18408	0.166324	-7.11913	1.08614e-12	3.63968e-11	Arhgap5
ENSMUSG00000030844	527.692	0.938796	0.131939	7.11536	1.1162e-12	3.73191e-11	Rgs10
ENSMUSG00000034994	91569.9	0.557577	0.0785322	7.09998	1.24777e-12	4.16235e-11	Eef2
ENSMUSG00000026094	1758.81	0.581127	0.0819595	7.09042	1.33709e-12	4.45023e-11	Stk17b
ENSMUSG00000033880	324.937	-0.931391	0.131442	-7.08592	1.38121e-12	4.58668e-11	Lgals3bp
ENSMUSG00000038037	576.043	-0.969889	0.137183	-7.07003	1.54897e-12	5.13217e-11	Socs1
ENSMUSG00000047344	196.735	-1.4077	0.199157	-7.06831	1.56826e-12	5.18443e-11	Lancl3
ENSMUSG00000022895	522.121	0.764132	0.108124	7.06718	1.58116e-12	5.21535e-11	Ets2
ENSMUSG00000040253	746.953	-0.824875	0.116831	-7.0604	1.66022e-12	5.46387e-11	Gbp7
ENSMUSG00000054693	3171.39	0.517478	0.0736502	7.02615	2.12309e-12	6.9716e-11	Adam10
ENSMUSG00000015143	2172.49	0.495191	0.0706037	7.01367	2.32149e-12	7.6061e-11	Actn1
ENSMUSG00000041341	812.146	-0.667313	0.0952351	-7.00701	2.43467e-12	7.95921e-11	Atg2b
ENSMUSG00000028223	302.988	0.986615	0.140883	7.00307	2.50416e-12	8.16822e-11	Decr1
ENSMUSG00000037161	55.8594	-7.34928	1.05159	-6.98872	2.77402e-12	9.01544e-11	Mgarp
ENSMUSG00000024248	1860.03	0.660781	0.0945511	6.98861	2.77615e-12	9.01544e-11	Cox7a2l
ENSMUSG00000023927	977.482	0.632041	0.0904906	6.98461	2.85651e-12	9.25597e-11	Satb1
ENSMUSG00000025332	2459.47	-0.523224	0.0749653	-6.97955	2.96124e-12	9.57424e-11	Kdm5c
ENSMUSG00000040675	2406.87	-0.493679	0.0707908	-6.97378	3.08538e-12	9.95373e-11	Mthfd1l
ENSMUSG00000034640	193.112	-1.20586	0.17293	-6.97311	3.10015e-12	9.97949e-11	Tiparp
ENSMUSG00000087341	474.423	-0.785697	0.112684	-6.97254	3.11259e-12	9.99766e-11	0610040F04Rik
ENSMUSG00000040734	118.756	-1.46495	0.210142	-6.97122	3.14199e-12	1.00701e-10	Ppp1r13l
ENSMUSG00000025014	28.7773	-4.33174	0.622038	-6.96379	3.31245e-12	1.05783e-10	Dntt
ENSMUSG00000086289	364.253	-0.938019	0.134703	-6.9636	3.31694e-12	1.05783e-10	NA
ENSMUSG00000020396	1421.21	-0.602789	0.0865656	-6.96338	3.32213e-12	1.05783e-10	Nefh
ENSMUSG00000042622	166.25	-1.35038	0.194191	-6.95388	3.55374e-12	1.12914e-10	Maff
ENSMUSG00000039232	578.717	-0.943627	0.135777	-6.94983	3.65719e-12	1.1595e-10	Stx11
ENSMUSG00000031029	4684.53	0.53836	0.0774973	6.94683	3.73596e-12	1.18193e-10	Eif3f
ENSMUSG00000020644	300.887	-0.941978	0.135616	-6.94594	3.75962e-12	1.18686e-10	Id2
ENSMUSG00000025140	61.1358	2.57801	0.371493	6.93959	3.93252e-12	1.23879e-10	Pycr1
ENSMUSG00000019851	137.238	1.3912	0.200557	6.93667	4.01442e-12	1.26188e-10	Perp
ENSMUSG00000021573	43.4092	-2.51389	0.362435	-6.93612	4.03023e-12	1.26415e-10	Tppp
ENSMUSG00000068227	4742.29	-0.573055	0.0826253	-6.93559	4.04527e-12	1.26617e-10	Il2rb
ENSMUSG00000097275	988.072	-0.612756	0.0883931	-6.93217	4.14433e-12	1.29442e-10	NA
ENSMUSG00000049866	165.004	1.31326	0.189479	6.93089	4.18211e-12	1.30345e-10	Arl4c
ENSMUSG00000025278	1310.89	0.757639	0.109367	6.92746	4.28452e-12	1.33255e-10	Flnb
ENSMUSG00000000308	30.5951	3.54448	0.512198	6.92015	4.51173e-12	1.40025e-10	Ckmt1
ENSMUSG00000020346	1391.25	-0.629045	0.0909781	-6.91424	4.70382e-12	1.4568e-10	Mgat1
ENSMUSG00000019487	209.518	-1.16715	0.168884	-6.91095	4.81404e-12	1.4878e-10	Trip10
ENSMUSG00000112546	76.6459	-1.87085	0.27076	-6.90963	4.85914e-12	1.49859e-10	NA
ENSMUSG00000025967	10951.1	0.496407	0.0718465	6.90926	4.87178e-12	1.49935e-10	Eef1b2
ENSMUSG00000055491	1649.84	-0.513767	0.074408	-6.90472	5.03014e-12	1.54485e-10	Pprc1
ENSMUSG00000028655	150.942	-1.33544	0.193602	-6.89782	5.2805e-12	1.61836e-10	Mfsd2a
ENSMUSG00000023026	1377.74	0.660804	0.0958056	6.89734	5.29863e-12	1.62054e-10	Dip2b
ENSMUSG00000027002	238.431	-1.10426	0.160281	-6.88954	5.59749e-12	1.7084e-10	Nckap1
ENSMUSG00000042082	134.271	1.51895	0.220663	6.88356	5.8375e-12	1.77796e-10	Arsb
ENSMUSG00000028234	12475	0.580183	0.0843776	6.87603	6.15432e-12	1.87058e-10	Rps20
ENSMUSG00000022020	335.916	-0.924234	0.134493	-6.87199	6.3311e-12	1.92035e-10	Naa16
ENSMUSG00000076441	1863.12	0.700585	0.102142	6.85896	6.93643e-12	2.09963e-10	Ass1
ENSMUSG00000099974	171.978	1.18782	0.173761	6.83595	8.14634e-12	2.4608e-10	Bcl2a1d
ENSMUSG00000046532	139.037	-1.38083	0.202013	-6.83537	8.17956e-12	2.46577e-10	Ar
ENSMUSG00000064368	2631.77	0.490491	0.0717924	6.83207	8.36984e-12	2.51797e-10	ND6
ENSMUSG00000056498	405.516	0.807764	0.118266	6.83003	8.4894e-12	2.54873e-10	Tmem154
ENSMUSG00000052684	257.591	-1.00176	0.14671	-6.82813	8.60269e-12	2.57748e-10	Jun
ENSMUSG00000003123	168.772	-1.3253	0.194412	-6.81695	9.29925e-12	2.78051e-10	Lipe
ENSMUSG00000106755	35.9813	-2.83231	0.415829	-6.81124	9.67606e-12	2.88731e-10	NA
ENSMUSG00000038059	67.6772	-1.9051	0.279833	-6.80798	9.89782e-12	2.94751e-10	Smim3
ENSMUSG00000028967	233.939	-1.1775	0.173307	-6.79433	1.08813e-11	3.23384e-10	Errfi1
ENSMUSG00000105558	59.6909	-2.05562	0.302705	-6.79085	1.11475e-11	3.30627e-10	NA
ENSMUSG00000062611	704.381	0.848675	0.12508	6.78506	1.16042e-11	3.43478e-10	Rps3a2
ENSMUSG00000040033	252.389	-0.988019	0.145953	-6.76942	1.29304e-11	3.81965e-10	Stat2
ENSMUSG00000020897	1690.38	-0.539413	0.0798643	-6.75412	1.43704e-11	4.23652e-10	Aurkb
ENSMUSG00000004451	202.986	-1.21113	0.179329	-6.75367	1.44147e-11	4.24109e-10	Ralb
ENSMUSG00000022090	406.744	0.873048	0.129395	6.74716	1.50769e-11	4.41855e-10	Pdlim2
ENSMUSG00000029823	2898.4	-0.45669	0.0676864	-6.74715	1.50779e-11	4.41855e-10	Luc7l2
ENSMUSG00000040618	432.023	2.51016	0.372179	6.7445	1.53552e-11	4.49087e-10	Pck2
ENSMUSG00000032392	60.2565	-2.05218	0.304406	-6.74159	1.56662e-11	4.57274e-10	Parp16
ENSMUSG00000032667	293.27	0.943671	0.140075	6.7369	1.61802e-11	4.7134e-10	Pon2
ENSMUSG00002075808	881.986	0.722423	0.107274	6.73436	1.64656e-11	4.78707e-10	NA
ENSMUSG00000047139	204.841	-1.26315	0.18761	-6.73287	1.66349e-11	4.82674e-10	Cd24a
ENSMUSG00000096054	157.4	1.22428	0.181876	6.73138	1.68057e-11	4.86671e-10	Syne1
ENSMUSG00000000275	733.716	-0.64531	0.0958816	-6.73028	1.69333e-11	4.89402e-10	Trim25
ENSMUSG00000024712	638.471	0.700641	0.104164	6.72633	1.7399e-11	5.01876e-10	Rfk
ENSMUSG00000094344	455.827	1.11331	0.165774	6.71581	1.87022e-11	5.3841e-10	NA
ENSMUSG00000029174	925.331	-0.61075	0.0910046	-6.7112	1.93028e-11	5.54616e-10	Tbc1d1
ENSMUSG00000054469	758.606	0.704229	0.105071	6.70241	2.05011e-11	5.87898e-10	Lclat1
ENSMUSG00000034168	497.999	0.747145	0.111585	6.69577	2.14541e-11	6.1403e-10	Irf2bpl
ENSMUSG00000025348	27.0431	-4.67107	0.698101	-6.69111	2.21489e-11	6.32684e-10	Itga7
ENSMUSG00000027533	726.293	-0.754907	0.112994	-6.68093	2.37439e-11	6.7693e-10	Fabp5
ENSMUSG00000034908	1943.72	0.563511	0.0844355	6.67386	2.49156e-11	7.08962e-10	Sidt2
ENSMUSG00000036959	372.013	-0.824327	0.123637	-6.66733	2.60503e-11	7.39818e-10	Bcorl1
ENSMUSG00000021866	712.913	0.667567	0.100131	6.66695	2.61176e-11	7.40301e-10	Anxa11
ENSMUSG00000040952	8974.43	0.485309	0.0728	6.66633	2.6228e-11	7.41999e-10	Rps19
ENSMUSG00000031604	1032.7	-0.734442	0.110252	-6.66146	2.71113e-11	7.65517e-10	Msmo1
ENSMUSG00000042262	118.359	1.43883	0.216073	6.65904	2.7563e-11	7.7678e-10	Ccr8
ENSMUSG00000036188	275.549	0.925807	0.13909	6.65618	2.81041e-11	7.90515e-10	Ankmy2
ENSMUSG00000032562	5807.07	0.421016	0.0633111	6.64996	2.93167e-11	8.2305e-10	Gnai2
ENSMUSG00000022009	454.135	-0.776586	0.116791	-6.64935	2.94398e-11	8.24931e-10	Nufip1
ENSMUSG00000022048	854.296	0.589349	0.0889316	6.627	3.42587e-11	9.58137e-10	Dpysl2
ENSMUSG00000065954	392.981	0.870957	0.131442	6.62618	3.44496e-11	9.61647e-10	Tacc1
ENSMUSG00000002228	68.8784	-1.91105	0.288551	-6.62292	3.52177e-11	9.81228e-10	Ppm1j
ENSMUSG00000029705	425.154	0.791096	0.119523	6.61879	3.6215e-11	1.00711e-09	Cux1
ENSMUSG00000029552	1954.61	-0.550267	0.0832469	-6.61007	3.84148e-11	1.06626e-09	Tes
ENSMUSG00000061887	483.349	0.795926	0.120987	6.5786	4.74887e-11	1.31564e-09	Ssbp3
ENSMUSG00000015961	3194.08	0.452888	0.0689217	6.57105	4.99601e-11	1.38151e-09	Adss
ENSMUSG00000000244	328.577	0.905911	0.138024	6.56343	5.25853e-11	1.45137e-09	Tspan32
ENSMUSG00000028889	563.63	-0.689313	0.105087	-6.55945	5.40053e-11	1.48778e-09	Yrdc
ENSMUSG00000059436	2579.24	-0.473751	0.0722616	-6.55605	5.52524e-11	1.51929e-09	Max
ENSMUSG00000027620	2740.49	-0.445109	0.0679313	-6.55234	5.66421e-11	1.55459e-09	Rbm39
ENSMUSG00000004885	319.96	-1.02203	0.156146	-6.54531	5.93738e-11	1.62653e-09	Crabp2
ENSMUSG00000031865	1303.86	0.560375	0.085664	6.54154	6.08872e-11	1.66489e-09	Dctn1
ENSMUSG00000118210	400.551	0.822591	0.126121	6.52223	6.92676e-11	1.89053e-09	NA
ENSMUSG00000051335	2010.4	0.628651	0.0964926	6.51502	7.26823e-11	1.98005e-09	Gfod1
ENSMUSG00000032399	29677.4	0.412995	0.0634285	6.5112	7.45543e-11	2.0273e-09	Rpl4
ENSMUSG00000021270	20728.7	-0.448669	0.0689841	-6.50394	7.82448e-11	2.12373e-09	Hsp90aa1
ENSMUSG00000045441	243.984	-1.22964	0.189132	-6.50149	7.95303e-11	2.15464e-09	Gprin3
ENSMUSG00000019564	357.474	-0.869666	0.133816	-6.49897	8.08731e-11	2.18699e-09	Arid3a
ENSMUSG00000030598	95.1567	-1.48559	0.228659	-6.49695	8.19638e-11	2.21242e-09	Fbxo17
ENSMUSG00000027360	85.6622	-1.60077	0.246453	-6.49523	8.29046e-11	2.23372e-09	Hdc
ENSMUSG00000083836	62.6604	-1.94038	0.298859	-6.49262	8.43573e-11	2.2687e-09	NA
ENSMUSG00000033933	836.706	-0.716008	0.110393	-6.48599	8.81531e-11	2.36646e-09	Vhl
ENSMUSG00000064363	3577.16	0.443709	0.068428	6.48432	8.91301e-11	2.38833e-09	ND4
ENSMUSG00000032579	177.988	-1.09117	0.168357	-6.48127	9.09509e-11	2.43269e-09	Hemk1
ENSMUSG00000053289	937.063	-0.604915	0.0934804	-6.47104	9.73333e-11	2.59868e-09	Ddx10
ENSMUSG00000033294	1269.07	-0.529964	0.0819237	-6.469	9.86536e-11	2.62915e-09	Noc4l
ENSMUSG00000081434	144.568	1.54683	0.239337	6.463	1.02646e-10	2.73061e-09	Gm14165
ENSMUSG00000033684	241.475	0.930947	0.144242	6.45407	1.08888e-10	2.88751e-09	Qsox1
ENSMUSG00000037742	138636	0.457424	0.0708745	6.454	1.08937e-10	2.88751e-09	Eef1a1
ENSMUSG00000035891	223.446	1.17921	0.18297	6.44482	1.15735e-10	3.06218e-09	Cerk
ENSMUSG00000028843	1428.56	0.612161	0.0950036	6.44356	1.16701e-10	3.08221e-09	Sh3bgrl3
ENSMUSG00000038145	533.834	0.675442	0.104887	6.43974	1.19677e-10	3.15513e-09	Snrk
ENSMUSG00000034731	255.721	-1.09039	0.169368	-6.43801	1.21051e-10	3.18566e-09	Dgkh
ENSMUSG00000029752	687.558	2.60175	0.404377	6.43396	1.24324e-10	3.26595e-09	Asns
ENSMUSG00000070730	952.159	-0.641863	0.0999044	-6.42477	1.32073e-10	3.45723e-09	Rmdn3
ENSMUSG00000042606	1057	-0.546942	0.0851303	-6.42476	1.32075e-10	3.45723e-09	Hirip3
ENSMUSG00000058587	2052.76	-0.472586	0.0736296	-6.41842	1.37698e-10	3.59801e-09	Tmod3
ENSMUSG00000055436	2309.77	-0.46211	0.0720201	-6.4164	1.39533e-10	3.63947e-09	Srsf11
ENSMUSG00000030421	1021.92	-0.57013	0.0890121	-6.40508	1.50289e-10	3.9131e-09	Uri1
ENSMUSG00000018819	1260.71	1.36355	0.213655	6.38203	1.74755e-10	4.54208e-09	Lsp1
ENSMUSG00000037652	831.779	-0.66621	0.104582	-6.37023	1.88742e-10	4.89697e-09	Phc3
ENSMUSG00000020275	1570.82	0.668865	0.105064	6.36627	1.93684e-10	5.01634e-09	Rel
ENSMUSG00000032370	288.671	0.925899	0.145643	6.3573	2.05324e-10	5.30848e-09	Lactb
ENSMUSG00000030793	452.056	0.784042	0.123573	6.34479	2.22727e-10	5.74832e-09	Pycard
ENSMUSG00000072235	1157.38	-0.693353	0.109331	-6.3418	2.27103e-10	5.85098e-09	Tuba1a
ENSMUSG00000021200	46.2064	-2.33132	0.367635	-6.34139	2.27701e-10	5.85615e-09	Asb2
ENSMUSG00000044770	125.501	1.2979	0.204736	6.33941	2.30642e-10	5.90923e-09	Scml4
ENSMUSG00000027508	558.237	0.821783	0.129632	6.33934	2.30755e-10	5.90923e-09	Pag1
ENSMUSG00000031960	2937.98	0.538319	0.0849192	6.33919	2.3097e-10	5.90923e-09	Aars
ENSMUSG00000034893	401.401	-0.743284	0.117349	-6.33395	2.38964e-10	6.10312e-09	Cog3
ENSMUSG00000003810	1199.27	0.603709	0.0953363	6.33242	2.41346e-10	6.15328e-09	Mast2
ENSMUSG00000021670	3910.29	-0.471029	0.074389	-6.33197	2.42051e-10	6.16058e-09	Hmgcr
ENSMUSG00000047867	967.934	-0.664199	0.104902	-6.33164	2.42571e-10	6.16314e-09	Gimap6
ENSMUSG00000041313	3425.77	0.646668	0.102146	6.33081	2.43874e-10	6.18556e-09	Slc7a1
ENSMUSG00000031021	554.33	0.671263	0.10627	6.3166	2.67389e-10	6.77031e-09	Tmem9b
ENSMUSG00000064352	727.87	0.705607	0.111785	6.31216	2.75176e-10	6.95551e-09	NA
ENSMUSG00000071757	325.904	0.824303	0.130893	6.29751	3.02458e-10	7.63201e-09	Zhx2
ENSMUSG00000032093	3445.91	0.417447	0.0663348	6.29303	3.11338e-10	7.84263e-09	Cd3e
ENSMUSG00000006517	392.523	-0.965462	0.153461	-6.29127	3.14886e-10	7.91843e-09	Mvd
ENSMUSG00000031983	120.613	-1.2794	0.203399	-6.29013	3.17204e-10	7.96312e-09	2310022B05Rik
ENSMUSG00000039967	729.111	-0.689858	0.109725	-6.28714	3.2337e-10	8.10407e-09	Zfp292
ENSMUSG00000055320	129.882	-1.36242	0.217228	-6.27182	3.56856e-10	8.92807e-09	Tead1
ENSMUSG00000057058	723.493	0.617719	0.0985295	6.26938	3.62497e-10	9.05382e-09	Skap1
ENSMUSG00000028412	318.683	0.905411	0.144516	6.26513	3.72513e-10	9.2882e-09	Slc44a1
ENSMUSG00000022686	151.021	-1.16072	0.185376	-6.26146	3.8138e-10	9.49321e-09	B3gnt5
ENSMUSG00000105703	351.556	1.06677	0.170383	6.26097	3.82579e-10	9.50697e-09	NA
ENSMUSG00000047261	26.6703	-3.46864	0.554246	-6.25831	3.89174e-10	9.65452e-09	Gap43
ENSMUSG00000028894	1391.02	-0.492427	0.0787555	-6.2526	4.03674e-10	9.99739e-09	Inpp5b
ENSMUSG00000027219	194.916	1.00521	0.160904	6.24726	4.17728e-10	1.03281e-08	Slc28a2
ENSMUSG00000060429	193.37	1.07241	0.171944	6.23695	4.46184e-10	1.10131e-08	Sntb1
ENSMUSG00000079641	5586.75	0.49453	0.0793207	6.23457	4.53035e-10	1.11635e-08	Rpl39
ENSMUSG00000034201	101.227	-1.54585	0.248171	-6.22898	4.69473e-10	1.15492e-08	Gas2l1
ENSMUSG00000021699	251.889	0.875201	0.140625	6.22367	4.85667e-10	1.19276e-08	Pde4d
ENSMUSG00000062006	6782.02	0.502264	0.0807146	6.22272	4.88624e-10	1.19802e-08	Rpl34
ENSMUSG00000062006	6782.02	0.502264	0.0807146	6.22272	4.88624e-10	1.19802e-08	Rpl34-ps1
ENSMUSG00000022280	1433.67	-0.54636	0.0878651	-6.21816	5.03007e-10	1.23124e-08	Rnf19a
ENSMUSG00000069520	429.128	0.816918	0.131448	6.21474	5.14084e-10	1.25527e-08	Tmem19
ENSMUSG00000110790	107.497	-1.35139	0.217454	-6.21461	5.14532e-10	1.25527e-08	NA
ENSMUSG00000076928	2000.47	0.502507	0.0809561	6.20715	5.39525e-10	1.31406e-08	NA
ENSMUSG00000024335	3295.43	-0.444767	0.0716785	-6.20502	5.46888e-10	1.3298e-08	Brd2
ENSMUSG00000034088	4955.6	-0.396958	0.0639991	-6.20255	5.55562e-10	1.34866e-08	Hdlbp
ENSMUSG00000054115	346.585	-0.789899	0.127559	-6.19241	5.9252e-10	1.43601e-08	Skp2
ENSMUSG00000025240	1295.04	0.490914	0.0793103	6.1898	6.02419e-10	1.4576e-08	Sacm1l
ENSMUSG00000048376	472.515	-0.749799	0.121376	-6.17748	6.51347e-10	1.57339e-08	F2r
ENSMUSG00000111079	70.7095	-1.68189	0.272335	-6.1758	6.58298e-10	1.58758e-08	Gm47112
ENSMUSG00000000532	215.391	-1.00095	0.162125	-6.17393	6.66127e-10	1.60383e-08	Acvr1b
ENSMUSG00000030082	3240.84	0.442831	0.0717365	6.17302	6.69969e-10	1.61044e-08	Sec61a1
ENSMUSG00000031824	63.8161	1.70014	0.275455	6.17212	6.73787e-10	1.61698e-08	6430548M08Rik
ENSMUSG00000032220	92.4007	1.77688	0.2879	6.17186	6.74898e-10	1.61701e-08	Myo1e
ENSMUSG00000079523	10650.8	-0.453039	0.0734936	-6.16433	7.07821e-10	1.69313e-08	Tmsb10
ENSMUSG00000042215	116.813	-1.25518	0.20383	-6.158	7.36706e-10	1.7567e-08	Bag2
ENSMUSG00000001576	981.714	0.542284	0.088062	6.15798	7.36783e-10	1.7567e-08	Ergic1
ENSMUSG00000021357	2361.19	-0.55614	0.090352	-6.15526	7.49543e-10	1.78423e-08	Exoc2
ENSMUSG00000029359	204.272	1.07544	0.174747	6.15425	7.54323e-10	1.7927e-08	Tesc
ENSMUSG00000021779	37.8587	2.54951	0.41448	6.1511	7.69496e-10	1.82581e-08	Thrb
ENSMUSG00000032216	435.33	-0.981741	0.159743	-6.14574	7.95935e-10	1.88551e-08	Nedd4
ENSMUSG00000033287	247.636	-0.871041	0.142	-6.13407	8.56588e-10	2.02593e-08	Kctd17
ENSMUSG00000021196	7849.17	-1.44946	0.236571	-6.12696	8.95712e-10	2.11506e-08	Pfkp
ENSMUSG00000034993	269.86	-0.98034	0.16002	-6.12636	8.99107e-10	2.11967e-08	Vat1
ENSMUSG00000108414	353.704	-0.821765	0.134168	-6.1249	9.07382e-10	2.13576e-08	NA
ENSMUSG00000030246	312.047	0.952496	0.155584	6.12205	9.23806e-10	2.17094e-08	Ldhb
ENSMUSG00000037949	220.386	0.954311	0.156206	6.10932	1.00059e-09	2.34764e-08	Ano10
ENSMUSG00000038648	253.052	0.889155	0.145571	6.10805	1.00856e-09	2.36257e-08	Creb3l2
ENSMUSG00000035273	24.2333	-3.44265	0.564177	-6.10207	1.04702e-09	2.44875e-08	Hpse
ENSMUSG00000057561	1751.82	-0.518945	0.0851442	-6.09489	1.09513e-09	2.55721e-08	Eif1a
ENSMUSG00000038264	850.461	-2.57207	0.423256	-6.07686	1.22562e-09	2.85738e-08	Sema7a
ENSMUSG00000024900	419.008	0.742481	0.122215	6.07519	1.23838e-09	2.88256e-08	Cpt1a
ENSMUSG00000026944	612.57	0.697669	0.114901	6.07192	1.26389e-09	2.93729e-08	Abca2
ENSMUSG00000008140	1320.55	0.505172	0.083264	6.06711	1.3023e-09	3.02178e-08	Emc10
ENSMUSG00000024045	1130.23	-0.497322	0.0821658	-6.05266	1.42475e-09	3.30071e-08	Akap8
ENSMUSG00000001228	3731.79	-0.395308	0.0653243	-6.05146	1.43536e-09	3.32007e-08	Uhrf1
ENSMUSG00000025545	81.734	-1.61398	0.267389	-6.03607	1.57913e-09	3.64686e-08	Clybl
ENSMUSG00000030651	69.228	1.61285	0.267224	6.03558	1.58388e-09	3.65211e-08	Art2b
ENSMUSG00000020647	384.871	0.922769	0.152907	6.03483	1.59133e-09	3.66355e-08	Ncoa1
ENSMUSG00000041235	798.242	-0.604716	0.100254	-6.03183	1.62114e-09	3.72634e-08	Chd7
ENSMUSG00000013846	548.299	0.889587	0.147594	6.02725	1.66777e-09	3.82754e-08	St3gal1
ENSMUSG00000037447	660.045	-0.619348	0.102797	-6.02494	1.69171e-09	3.87643e-08	Arid5a
ENSMUSG00000022377	723.851	0.672409	0.111674	6.02118	1.73146e-09	3.96135e-08	Asap1
ENSMUSG00000024402	2272.97	-1.56344	0.259681	-6.02061	1.73756e-09	3.96915e-08	Lta
ENSMUSG00000116530	34.9194	3.20214	0.532936	6.00848	1.87266e-09	4.27112e-08	Gm32312
ENSMUSG00000033326	739.88	0.594206	0.0989878	6.00282	1.93925e-09	4.41614e-08	Kdm4a
ENSMUSG00000067889	26.9053	-3.04899	0.508327	-5.99808	1.99665e-09	4.53983e-08	Sptbn2
ENSMUSG00000040511	293.233	-0.82225	0.137114	-5.99684	2.01196e-09	4.56434e-08	Pvr
ENSMUSG00000004266	3398.83	-0.485257	0.0809206	-5.9967	2.01363e-09	4.56434e-08	Ptpn6
ENSMUSG00000033530	460.119	0.679665	0.113418	5.99259	2.06529e-09	4.67423e-08	Ttc7b
ENSMUSG00000063696	921.279	0.801796	0.133809	5.99211	2.07133e-09	4.6807e-08	Gm8730
ENSMUSG00000003161	1500.64	0.472435	0.078906	5.98731	2.13341e-09	4.81358e-08	Sri
ENSMUSG00000016495	267.646	0.905953	0.151353	5.98568	2.15489e-09	4.85461e-08	Plgrkt
ENSMUSG00000032094	2372.38	0.546316	0.0912947	5.98409	2.17597e-09	4.89459e-08	Cd3d
ENSMUSG00000026743	605.606	-0.660126	0.110468	-5.97572	2.29074e-09	5.1449e-08	Mllt10
ENSMUSG00000054072	2962.54	-1.18632	0.198571	-5.9743	2.31081e-09	5.18205e-08	Iigp1
ENSMUSG00000024038	592.674	-0.813322	0.136182	-5.97234	2.3388e-09	5.23686e-08	Ndufv3
ENSMUSG00000029201	796.548	-0.56406	0.0944727	-5.97061	2.36364e-09	5.28443e-08	Ugdh
ENSMUSG00000026867	2276.52	-0.482446	0.0808771	-5.96517	2.4438e-09	5.45535e-08	Gapvd1
ENSMUSG00000031304	5363.43	0.465271	0.0781323	5.95492	2.60202e-09	5.79975e-08	Il2rg
ENSMUSG00000033538	168.68	1.16485	0.195654	5.95363	2.62255e-09	5.83666e-08	Casp4
ENSMUSG00000026012	4847.63	0.415691	0.0699443	5.94317	2.79556e-09	6.21231e-08	Cd28
ENSMUSG00000020576	550.055	0.683531	0.11509	5.93912	2.86562e-09	6.35839e-08	Nbas
ENSMUSG00000031634	305.52	-0.806432	0.135836	-5.93682	2.90608e-09	6.43846e-08	Ufsp2
ENSMUSG00000057914	20.9737	-4.06171	0.684418	-5.93455	2.94645e-09	6.51807e-08	Cacnb2
ENSMUSG00000027660	827.648	0.559991	0.0943912	5.93266	2.98065e-09	6.58383e-08	Skil
ENSMUSG00000114687	39.9644	-2.33125	0.393075	-5.9308	3.01459e-09	6.64882e-08	NA
ENSMUSG00000027068	36.0362	2.32713	0.392634	5.92696	3.08602e-09	6.79617e-08	Dhrs9
ENSMUSG00000067274	52344.6	0.373303	0.0629935	5.92607	3.10278e-09	6.82287e-08	Rplp0
ENSMUSG00000064125	40.975	-2.41273	0.407225	-5.9248	3.12673e-09	6.86527e-08	Prr36
ENSMUSG00000002083	308.592	0.992945	0.167682	5.92159	3.18841e-09	6.99026e-08	Bbc3
ENSMUSG00000097604	23.0475	-3.50522	0.59224	-5.91858	3.24726e-09	7.10869e-08	NA
ENSMUSG00000020484	1366.89	-0.600648	0.101542	-5.91529	3.31286e-09	7.24153e-08	Xbp1
ENSMUSG00000037126	612.451	0.586308	0.0991589	5.91281	3.3632e-09	7.34066e-08	Psd
ENSMUSG00000040236	607.178	-0.59454	0.100579	-5.91116	3.39697e-09	7.40338e-08	Trappc5
ENSMUSG00000096210	267.274	-0.914568	0.154826	-5.90705	3.48284e-09	7.57931e-08	H1f0
ENSMUSG00000024845	457.184	0.703775	0.119193	5.90449	3.53742e-09	7.6867e-08	Tmem134
ENSMUSG00000026349	234.198	-0.916932	0.155406	-5.90023	3.62988e-09	7.87599e-08	Ccnt2
ENSMUSG00000031065	272.934	-0.821846	0.139319	-5.89902	3.65661e-09	7.91859e-08	Cdk16
ENSMUSG00000035186	28.4993	-6.37369	1.0805	-5.89886	3.66028e-09	7.91859e-08	Ubd
ENSMUSG00000092274	82.6793	-1.6151	0.273991	-5.89471	3.75336e-09	8.10802e-08	Neat1
ENSMUSG00000023087	410.029	-0.713494	0.121049	-5.89427	3.76334e-09	8.11768e-08	Noct
ENSMUSG00000031303	910.287	0.531461	0.0901941	5.89241	3.80601e-09	8.19769e-08	Map3k15
ENSMUSG00000087108	148.129	-1.19783	0.203569	-5.88417	4.00058e-09	8.59396e-08	NA
ENSMUSG00000038437	1710.96	-0.452577	0.0769149	-5.88412	4.00168e-09	8.59396e-08	Mllt6
ENSMUSG00000044224	1045.73	-0.60944	0.103619	-5.88153	4.06481e-09	8.71682e-08	Dnajc21
ENSMUSG00000020100	676.619	0.793603	0.134945	5.88092	4.07984e-09	8.73633e-08	Slc29a3
ENSMUSG00000024258	1112.66	-0.50981	0.0866999	-5.88017	4.0985e-09	8.76352e-08	Polr2d
ENSMUSG00000018916	34.4808	-2.6542	0.45142	-5.87967	4.11091e-09	8.77731e-08	Csf2
ENSMUSG00000022102	400.67	-0.747269	0.127106	-5.8791	4.12514e-09	8.79492e-08	Dok2
ENSMUSG00000028070	277.788	0.808572	0.137566	5.87772	4.15967e-09	8.8557e-08	Naxe
ENSMUSG00000029647	468.904	-0.679416	0.115629	-5.87585	4.20683e-09	8.94317e-08	Pan3
ENSMUSG00000091191	754.347	-0.619621	0.105487	-5.87394	4.25559e-09	9.03376e-08	NA
ENSMUSG00000028273	568.932	0.697269	0.118737	5.87236	4.29625e-09	9.10693e-08	Pdlim5
ENSMUSG00000048371	469.412	-0.650605	0.111085	-5.85684	4.71751e-09	9.9855e-08	Pdp2
ENSMUSG00000027952	604.373	-0.795162	0.135809	-5.85499	4.77029e-09	1.00827e-07	Pmvk
ENSMUSG00000033257	556.551	-0.654439	0.111846	-5.85125	4.87896e-09	1.02976e-07	Ttll4
ENSMUSG00000053522	102.485	-1.25619	0.215004	-5.84265	5.13768e-09	1.08281e-07	Lgals7
ENSMUSG00000089726	61.17	-1.73106	0.296479	-5.83873	5.26005e-09	1.10427e-07	NA
ENSMUSG00000078713	1007.24	-0.52897	0.0905975	-5.83868	5.26167e-09	1.10427e-07	Tomm5
ENSMUSG00000070934	884.636	-0.554567	0.0949818	-5.83867	5.26201e-09	1.10427e-07	Rraga
ENSMUSG00000021367	20.8681	-3.84739	0.659189	-5.83655	5.32933e-09	1.11681e-07	Edn1
ENSMUSG00000028936	4995.13	0.423931	0.0726573	5.83466	5.39002e-09	1.12792e-07	Rpl22
ENSMUSG00000036478	6322.38	-0.37672	0.064581	-5.8333	5.43433e-09	1.13557e-07	Btg1
ENSMUSG00000020372	25740.3	0.414626	0.0710928	5.83218	5.47074e-09	1.14156e-07	Rack1
ENSMUSG00000029204	659.408	-0.603251	0.103574	-5.82435	5.73352e-09	1.1947e-07	Rhoh
ENSMUSG00000050410	615.546	0.781603	0.134408	5.81513	6.05854e-09	1.26064e-07	Tcf19
ENSMUSG00000009863	1523.33	0.472217	0.0812253	5.81368	6.1115e-09	1.26986e-07	Sdhb
ENSMUSG00000036853	49.3861	1.9873	0.342031	5.81031	6.2356e-09	1.29382e-07	Mcoln3
ENSMUSG00000045128	13761.5	0.418427	0.0720698	5.80586	6.40364e-09	1.32682e-07	Rpl18a
ENSMUSG00000019920	1164.66	0.492568	0.0848676	5.80396	6.47657e-09	1.34004e-07	Lims1
ENSMUSG00000053835	174.366	-1.00649	0.173745	-5.79293	6.91708e-09	1.42917e-07	H2-T24
ENSMUSG00000025742	1261.97	0.473101	0.08168	5.79213	6.94985e-09	1.43393e-07	Prps2
ENSMUSG00000039985	721.888	-0.555418	0.095968	-5.78753	7.14307e-09	1.47136e-07	Sinhcaf
ENSMUSG00000074794	90.0993	1.52816	0.264053	5.78733	7.15126e-09	1.47136e-07	Arrdc3
ENSMUSG00000061477	14995.6	0.376507	0.0650927	5.78416	7.28749e-09	1.49729e-07	Rps7
ENSMUSG00000030615	327.92	0.738145	0.127658	5.78221	7.37265e-09	1.51268e-07	Tmem126a
ENSMUSG00000018042	846.291	-0.538865	0.0932092	-5.78124	7.41502e-09	1.51925e-07	Cyb5r3
ENSMUSG00000027881	1658.27	-0.443801	0.0767979	-5.77882	7.52264e-09	1.53806e-07	Prpf38b
ENSMUSG00000032806	128.622	1.10081	0.190494	5.77871	7.52771e-09	1.53806e-07	Slc10a3
ENSMUSG00000039480	476.125	0.637055	0.110279	5.77676	7.61509e-09	1.55375e-07	Nt5dc1
ENSMUSG00000091021	285.222	-0.77323	0.13389	-5.77513	7.68958e-09	1.56678e-07	NA
ENSMUSG00000035992	649.492	-0.671982	0.116579	-5.76415	8.20683e-09	1.66986e-07	Fnip1
ENSMUSG00000026009	1803.52	-0.544117	0.0944035	-5.76374	8.22707e-09	1.67166e-07	Icos
ENSMUSG00000020689	246.142	0.831004	0.14439	5.75528	8.64964e-09	1.7551e-07	Itgb3
ENSMUSG00000037972	134.317	1.34789	0.2343	5.75282	8.77678e-09	1.77845e-07	Snn
ENSMUSG00000034361	44.2753	2.05247	0.356889	5.751	8.87191e-09	1.79525e-07	Cpne2
ENSMUSG00000006649	373.142	1.04888	0.182451	5.74881	8.98756e-09	1.81615e-07	Nphs1
ENSMUSG00000041773	754.084	-0.667984	0.116204	-5.74837	9.01081e-09	1.81835e-07	Enc1
ENSMUSG00000031521	204.806	0.895498	0.155819	5.74704	9.08187e-09	1.83018e-07	Aga
ENSMUSG00000041870	1841.49	0.412405	0.0717982	5.74395	9.24947e-09	1.86141e-07	Ankrd13a
ENSMUSG00000022982	3597.06	0.445844	0.0776709	5.74016	9.45861e-09	1.89985e-07	Sod1
ENSMUSG00000029422	785.495	-0.594364	0.103547	-5.74002	9.4663e-09	1.89985e-07	Rsrc2
ENSMUSG00000030067	2520.35	0.430305	0.0749818	5.73879	9.53535e-09	1.9111e-07	Foxp1
ENSMUSG00000000594	638.108	-0.700004	0.121988	-5.73832	9.56221e-09	1.91387e-07	Gm2a
ENSMUSG00000024640	5010.15	0.562317	0.0979975	5.73808	9.57568e-09	1.91396e-07	Psat1
ENSMUSG00000041779	143.341	1.0553	0.183969	5.73628	9.67787e-09	1.93177e-07	Tram2
ENSMUSG00000032515	932.458	-0.547162	0.0954437	-5.73283	9.87693e-09	1.96883e-07	Csrnp1
ENSMUSG00000024759	1593.25	0.442856	0.0772881	5.72994	1.00469e-08	1.99999e-07	Atl3
ENSMUSG00000035953	1356.44	-0.490276	0.0855991	-5.72759	1.01867e-08	2.02509e-07	Pip4p1
ENSMUSG00000005043	157.949	1.10087	0.192235	5.72667	1.02419e-08	2.03331e-07	Sgsh
ENSMUSG00000029860	942.024	0.597283	0.104466	5.71747	1.08125e-08	2.14097e-07	Zyx
ENSMUSG00000054520	764.534	-0.648401	0.113407	-5.71745	1.08133e-08	2.14097e-07	Sh3bp2
ENSMUSG00000024498	1949.13	-0.430145	0.0752512	-5.71613	1.08977e-08	2.15478e-07	Tcerg1
ENSMUSG00000036565	678.419	0.756412	0.132361	5.71478	1.09845e-08	2.16672e-07	Ttyh3
ENSMUSG00000000631	536.651	0.645002	0.112866	5.71474	1.09875e-08	2.16672e-07	Myo18a
ENSMUSG00000002395	461.322	0.671243	0.117553	5.71013	1.12891e-08	2.22321e-07	Use1
ENSMUSG00000037235	126.663	1.21157	0.212203	5.70947	1.13329e-08	2.22884e-07	Mxd4
ENSMUSG00000028433	2932.77	-0.492717	0.086312	-5.70856	1.13936e-08	2.23779e-07	Ubap2
ENSMUSG00000017843	2510.76	0.414467	0.0726078	5.7083	1.14111e-08	2.23824e-07	Ppp2r5c
ENSMUSG00000009418	40.73	-2.03547	0.356703	-5.70634	1.15431e-08	2.26113e-07	Nav1
ENSMUSG00000074785	430.101	0.782199	0.137137	5.70379	1.17174e-08	2.29222e-07	Plxnc1
ENSMUSG00000067071	161.071	-1.01412	0.17797	-5.69827	1.21026e-08	2.36442e-07	Hes6
ENSMUSG00000008668	14332.9	0.420712	0.0738736	5.69502	1.23355e-08	2.40673e-07	Rps18
ENSMUSG00000055065	2936.76	0.421713	0.0741716	5.68564	1.30323e-08	2.53931e-07	Ddx17
ENSMUSG00000026483	331.927	0.866073	0.152335	5.68534	1.30556e-08	2.54048e-07	Niban1
ENSMUSG00000029217	57.9354	-1.68236	0.296415	-5.67569	1.38133e-08	2.68178e-07	Tec
ENSMUSG00000036737	2056.6	-0.60469	0.106542	-5.67563	1.38182e-08	2.68178e-07	Oxsr1
ENSMUSG00000024431	734.878	0.605197	0.106695	5.67221	1.40969e-08	2.73227e-07	Nr3c1
ENSMUSG00000085385	124.557	-1.18841	0.209595	-5.67004	1.42764e-08	2.76343e-07	Snhg17
ENSMUSG00000002014	882.505	0.515079	0.0909029	5.66626	1.45952e-08	2.82142e-07	Ssr4
ENSMUSG00000033767	1045.08	-0.487539	0.0861368	-5.66005	1.51325e-08	2.92144e-07	Tmem131l
ENSMUSG00000016481	547.421	0.602519	0.106474	5.65885	1.52394e-08	2.93823e-07	Cr1l
ENSMUSG00000032420	462.288	0.859445	0.152181	5.64753	1.62768e-08	3.13414e-07	Nt5e
ENSMUSG00000053714	93.6166	-1.29081	0.228591	-5.6468	1.63463e-08	3.1434e-07	4732471J01Rik
ENSMUSG00000069874	847.16	-0.600956	0.106471	-5.64434	1.65821e-08	3.18458e-07	Irgm2
ENSMUSG00000051495	875.835	0.513367	0.0910616	5.63758	1.72456e-08	3.30769e-07	Irf2bp2
ENSMUSG00000006356	114.866	1.27192	0.22572	5.63493	1.75131e-08	3.35463e-07	Crip2
ENSMUSG00000020297	151	1.0382	0.184422	5.62947	1.80768e-08	3.4581e-07	Nsg2
ENSMUSG00000044533	45918.2	0.37417	0.0664691	5.62924	1.8101e-08	3.45823e-07	Rps2
ENSMUSG00000038496	18.4398	-4.70508	0.836444	-5.62509	1.85407e-08	3.53765e-07	Slc19a3
ENSMUSG00000025137	639.288	-0.637852	0.113446	-5.62254	1.88171e-08	3.58572e-07	Pcyt2
ENSMUSG00000015112	362.604	-0.680718	0.121175	-5.61765	1.93569e-08	3.68381e-07	Slc25a13
ENSMUSG00000022769	955.214	-0.562457	0.100267	-5.60957	2.02834e-08	3.85516e-07	Sdf2l1
ENSMUSG00000003308	1095.32	-0.500231	0.0893373	-5.59936	2.1515e-08	4.08396e-07	Keap1
ENSMUSG00000079470	260.003	-0.884634	0.158126	-5.5945	2.21262e-08	4.19457e-07	Utp14b
ENSMUSG00000010097	1114.19	-0.467662	0.0836971	-5.58756	2.30285e-08	4.36001e-07	Nxf1
ENSMUSG00000027997	219.688	-1.02084	0.182738	-5.58637	2.3187e-08	4.38436e-07	Casp6
ENSMUSG00000024608	18012	0.47234	0.0846111	5.58248	2.37116e-08	4.4778e-07	Rps14
ENSMUSG00000028423	1443.19	-0.458032	0.0820528	-5.58216	2.37555e-08	4.48035e-07	Nfx1
ENSMUSG00000024661	3317.14	0.42745	0.0765835	5.58149	2.38468e-08	4.4918e-07	Fth1
ENSMUSG00000051510	573.277	-0.588804	0.105498	-5.58118	2.3889e-08	4.49401e-07	Mafg
ENSMUSG00000039485	97.0917	1.21384	0.217725	5.5751	2.4739e-08	4.64797e-07	Tspyl4
ENSMUSG00000032621	748.843	-0.535062	0.0960568	-5.57027	2.54341e-08	4.77246e-07	Srek1
ENSMUSG00000025888	83.8878	1.35551	0.24342	5.5686	2.56792e-08	4.81231e-07	Casp1
ENSMUSG00000027198	943.061	0.502843	0.0903333	5.56653	2.59862e-08	4.86365e-07	Ext2
ENSMUSG00000025153	8229.12	-0.436176	0.0784051	-5.56311	2.65007e-08	4.95364e-07	Fasn
ENSMUSG00000050473	23.3398	-2.92509	0.526163	-5.55929	2.70868e-08	5.05678e-07	Slc35d3
ENSMUSG00000024966	5925.71	-0.365074	0.0657207	-5.55493	2.77728e-08	5.17827e-07	Stip1
ENSMUSG00000021996	1339.04	0.432828	0.0779538	5.55237	2.81826e-08	5.24802e-07	Esd
ENSMUSG00000024789	4406.38	-0.622774	0.112195	-5.55081	2.84341e-08	5.28424e-07	Jak2
ENSMUSG00000030208	82.6776	-1.52541	0.274813	-5.55072	2.84489e-08	5.28424e-07	Emp1
ENSMUSG00000000682	3431.62	0.489029	0.0881291	5.54901	2.87298e-08	5.32968e-07	Cd52
ENSMUSG00000045826	2954.88	0.407646	0.0735323	5.54378	2.96019e-08	5.48455e-07	Ptprcap
ENSMUSG00000029338	247.333	1.01059	0.182307	5.54335	2.96743e-08	5.49104e-07	Antxr2
ENSMUSG00000043192	129.2	-1.27698	0.230468	-5.54082	3.0106e-08	5.56394e-07	Gpi-ps
ENSMUSG00000025508	12336.9	0.436905	0.0788563	5.54052	3.01568e-08	5.56633e-07	Rplp2
ENSMUSG00000021171	1361.56	0.533101	0.0962528	5.53855	3.04984e-08	5.62212e-07	Esyt2
ENSMUSG00000116757	199.418	1.09181	0.197136	5.53834	3.05355e-08	5.62212e-07	NA
ENSMUSG00000049517	9988.21	0.409112	0.0738924	5.53659	3.08411e-08	5.67128e-07	Rps23
ENSMUSG00000032046	393.472	0.671839	0.1214	5.53409	3.12847e-08	5.74568e-07	Abhd12
ENSMUSG00000027613	2289.81	-0.429139	0.0776262	-5.52828	3.23381e-08	5.93173e-07	Eif6
ENSMUSG00000051444	92.6331	-1.25343	0.226897	-5.52421	3.30968e-08	6.06336e-07	Bbs12
ENSMUSG00000089809	65.5788	1.5462	0.279916	5.52381	3.31725e-08	6.06966e-07	A930011G23Rik
ENSMUSG00000089809	65.5788	1.5462	0.279916	5.52381	3.31725e-08	6.06966e-07	Rasgef1b
ENSMUSG00000024486	109.87	-1.52295	0.275753	-5.52289	3.33477e-08	6.09413e-07	Hbegf
ENSMUSG00000028525	202.51	0.902747	0.163474	5.52227	3.34645e-08	6.1079e-07	Pde4b
ENSMUSG00000045671	733.84	-0.530903	0.0961696	-5.52049	3.3806e-08	6.16259e-07	Spred2
ENSMUSG00000035473	485.397	0.688244	0.124704	5.51903	3.40883e-08	6.20635e-07	Galm
ENSMUSG00000092482	834.474	-0.545815	0.0989873	-5.51399	3.50796e-08	6.37894e-07	NA
ENSMUSG00000020401	557.347	-2.07203	0.375848	-5.51296	3.52852e-08	6.40841e-07	Garin3
ENSMUSG00000046879	1857.33	-1.14321	0.207434	-5.51121	3.56373e-08	6.46437e-07	Irgm1
ENSMUSG00000090733	4568.39	0.45693	0.0829257	5.51011	3.58611e-08	6.49696e-07	Rps27
ENSMUSG00000121489	3732.52	-0.417122	0.0757044	-5.50988	3.59083e-08	6.4975e-07	1810014B01Rik
ENSMUSG00000052707	1120.87	-0.512702	0.093085	-5.50789	3.63155e-08	6.5631e-07	Tnrc6a
ENSMUSG00000021938	761.572	0.566121	0.102925	5.50035	3.79041e-08	6.8418e-07	Pspc1
ENSMUSG00000109735	27.3298	-2.58901	0.470734	-5.49995	3.79902e-08	6.84894e-07	NA
ENSMUSG00000030432	15358.4	0.370373	0.067348	5.49939	3.81102e-08	6.86217e-07	Rpl28
ENSMUSG00000046711	2074.37	-0.490222	0.0892509	-5.49263	3.95998e-08	7.12166e-07	Hmga1
ENSMUSG00000048721	150.409	-1.15885	0.211132	-5.48874	4.04803e-08	7.27113e-07	Fndc9
ENSMUSG00000024527	1246.93	-0.434998	0.0793233	-5.48387	4.16131e-08	7.46549e-07	Afg3l2
ENSMUSG00000054387	551.892	-0.595809	0.108676	-5.48244	4.19511e-08	7.51696e-07	Mdm4
ENSMUSG00000022912	600.375	-1.61696	0.294987	-5.48147	4.21797e-08	7.54873e-07	Pros1
ENSMUSG00000031246	1485.02	-0.458843	0.0837423	-5.47924	4.27168e-08	7.63557e-07	Sh3bgrl
ENSMUSG00000050812	1600.28	-0.473618	0.0865231	-5.47388	4.40279e-08	7.86037e-07	Ecpas
ENSMUSG00000064145	647.695	-0.529201	0.0966928	-5.47302	4.42427e-08	7.88914e-07	Arih2
ENSMUSG00000032301	2996.88	-0.3836	0.0701202	-5.4706	4.48524e-08	7.98818e-07	Psma4
ENSMUSG00000031342	250.991	-1.90698	0.348776	-5.46765	4.56045e-08	8.1123e-07	Gpm6b
ENSMUSG00000032525	863.393	-0.57653	0.105483	-5.46563	4.61273e-08	8.19539e-07	Nktr
ENSMUSG00000051212	319.907	1.00685	0.184408	5.45991	4.76363e-08	8.4533e-07	Gpr183
ENSMUSG00000026117	2775.96	0.391103	0.0716998	5.45473	4.90471e-08	8.68444e-07	Zap70
ENSMUSG00000020898	543.437	0.563252	0.10326	5.4547	4.9057e-08	8.68444e-07	Ctc1
ENSMUSG00000042225	652.688	-0.563216	0.103293	-5.45258	4.9644e-08	8.77781e-07	Ammecr1
ENSMUSG00000022863	236.943	-0.830056	0.152266	-5.45134	4.99915e-08	8.82863e-07	Btg3
ENSMUSG00000032000	810.632	-0.498509	0.0915299	-5.4464	5.13983e-08	9.0662e-07	Birc3
ENSMUSG00000002250	503.486	-0.624713	0.114759	-5.44368	5.219e-08	9.19481e-07	Ppard
ENSMUSG00000002250	503.486	-0.624713	0.114759	-5.44368	5.219e-08	9.19481e-07	1810013A23Rik
ENSMUSG00000024937	419.048	-0.69693	0.128119	-5.4397	5.33717e-08	9.39176e-07	Ehbp1l1
ENSMUSG00000024413	506.453	0.606537	0.111564	5.43668	5.42826e-08	9.54064e-07	Npc1
ENSMUSG00000024830	3212.07	0.443496	0.0816794	5.42972	5.64423e-08	9.90839e-07	Rps6kb2
ENSMUSG00000047866	993.665	0.493336	0.0908896	5.42785	5.70358e-08	1.00006e-06	Lonp2
ENSMUSG00000059474	417.746	-0.680233	0.125405	-5.42429	5.81848e-08	1.019e-06	Mbtd1
ENSMUSG00000046314	28.8931	-2.54241	0.469196	-5.41865	6.00494e-08	1.0504e-06	Stxbp6
ENSMUSG00000053442	192.99	-1.08889	0.200972	-5.41811	6.02328e-08	1.05236e-06	NA
ENSMUSG00000017386	1096.65	-0.512958	0.0947866	-5.41172	6.2423e-08	1.08933e-06	Traf4
ENSMUSG00000060131	367.534	-0.809421	0.149735	-5.4057	6.45574e-08	1.12524e-06	Atp8b4
ENSMUSG00000003528	722.069	-0.617638	0.114283	-5.40447	6.50015e-08	1.13164e-06	Slc25a1
ENSMUSG00000031770	453.921	0.610146	0.112967	5.40109	6.62379e-08	1.1518e-06	Herpud1
ENSMUSG00000035284	336.148	0.800071	0.148198	5.39865	6.7145e-08	1.1662e-06	Vps13c
ENSMUSG00000050075	327.928	0.768712	0.142578	5.39153	6.98619e-08	1.21196e-06	Gpr171
ENSMUSG00000051391	4183.98	-0.347998	0.0645889	-5.38789	7.12888e-08	1.23525e-06	Ywhag
ENSMUSG00000053907	2793.77	-0.427825	0.0794742	-5.3832	7.31749e-08	1.26644e-06	Mat2a
ENSMUSG00000020571	4082.15	-0.362136	0.0672906	-5.38168	7.37942e-08	1.27566e-06	Pdia6
ENSMUSG00000006310	379.032	-0.76464	0.142159	-5.37877	7.49982e-08	1.29495e-06	Zbtb32
ENSMUSG00000029405	2658.41	-0.375412	0.0698226	-5.37665	7.58827e-08	1.30869e-06	G3bp2
ENSMUSG00000021134	2086.18	-0.386088	0.0718126	-5.37632	7.60246e-08	1.3096e-06	Srsf5
ENSMUSG00000026880	105.355	1.23535	0.230151	5.36755	7.98138e-08	1.37326e-06	Stom
ENSMUSG00000063457	10810.6	0.410798	0.0766184	5.36162	8.24805e-08	1.41749e-06	Rps15
ENSMUSG00000117050	307.672	0.903779	0.168624	5.35974	8.33412e-08	1.43061e-06	NA
ENSMUSG00000022378	2309.63	-0.39479	0.0736739	-5.35861	8.38646e-08	1.43792e-06	Cyrib
ENSMUSG00000030707	8164.05	0.399148	0.0745237	5.35598	8.50917e-08	1.45726e-06	Coro1a
ENSMUSG00000022831	2604.18	0.392817	0.0734003	5.35171	8.7129e-08	1.49041e-06	Hcls1
ENSMUSG00000010095	1762.47	0.647658	0.121091	5.34854	8.86676e-08	1.51497e-06	Slc3a2
ENSMUSG00000028673	395.402	0.673686	0.125993	5.34703	8.94115e-08	1.52591e-06	Fuca1
ENSMUSG00000071533	1500.03	-0.44474	0.0832217	-5.34404	9.08967e-08	1.54946e-06	Pcnp
ENSMUSG00000005034	1088.67	0.438505	0.0821514	5.33776	9.41016e-08	1.60223e-06	Prkacb
ENSMUSG00000030824	2052.61	0.381159	0.0714216	5.33675	9.46286e-08	1.60934e-06	Nucb1
ENSMUSG00000040842	2519.3	-0.379508	0.0711329	-5.3352	9.54405e-08	1.62128e-06	Szrd1
ENSMUSG00000026475	2042.91	-0.619141	0.116079	-5.33381	9.61721e-08	1.63182e-06	Rgs16
ENSMUSG00000033350	1272.43	0.541177	0.101622	5.32539	1.00739e-07	1.70604e-06	Chst2
ENSMUSG00000031101	1276.33	-0.46857	0.0879892	-5.32531	1.00779e-07	1.70604e-06	Sash3
ENSMUSG00000063273	2955.54	-0.390234	0.0732874	-5.32472	1.0111e-07	1.70968e-06	Naa15
ENSMUSG00000110279	11053.6	0.359123	0.0674846	5.32155	1.02886e-07	1.73588e-06	NA
ENSMUSG00000039910	586.888	-0.701447	0.131813	-5.32154	1.02895e-07	1.73588e-06	Cited2
ENSMUSG00000037211	1133.48	0.596826	0.112199	5.31934	1.04143e-07	1.75491e-06	Spry1
ENSMUSG00000015176	4126.98	-0.349592	0.0657546	-5.31662	1.05713e-07	1.77934e-06	Nolc1
ENSMUSG00000035834	301.437	-0.702327	0.132106	-5.31637	1.05858e-07	1.77975e-06	Polr3g
ENSMUSG00000031024	47.6498	-1.69556	0.318964	-5.31582	1.06175e-07	1.7815e-06	Dennd2b
ENSMUSG00000024399	3193.18	-0.590414	0.111068	-5.31577	1.06205e-07	1.7815e-06	Ltb
ENSMUSG00000025584	100.438	1.21514	0.228621	5.31508	1.06612e-07	1.78629e-06	Pde8a
ENSMUSG00000034445	275.43	0.730145	0.137432	5.31277	1.07973e-07	1.80581e-06	Cyb561a3
ENSMUSG00000103219	84.5835	-1.27964	0.240866	-5.31268	1.08022e-07	1.80581e-06	NA
ENSMUSG00000030086	177.058	-0.916851	0.172688	-5.30929	1.10052e-07	1.83766e-06	Chchd6
ENSMUSG00000041126	699.064	0.596465	0.112362	5.30841	1.10586e-07	1.84448e-06	H2az2
ENSMUSG00000037936	649.003	-0.534377	0.100699	-5.30666	1.1165e-07	1.86011e-06	Scarb1
ENSMUSG00000054720	701.977	0.522381	0.098484	5.30422	1.13155e-07	1.88305e-06	Lrrc8c
ENSMUSG00000048490	944.302	0.583505	0.110066	5.3014	1.14916e-07	1.9102e-06	Nrip1
ENSMUSG00000021365	1233.73	-0.454321	0.0857723	-5.29682	1.17834e-07	1.9565e-06	Nedd9
ENSMUSG00000003429	15541.4	0.378657	0.0715355	5.29327	1.20149e-07	1.99269e-06	Rps11
ENSMUSG00000015501	965.186	0.608019	0.11489	5.2922	1.20853e-07	2.0021e-06	Hivep2
ENSMUSG00000020460	9900.27	0.40848	0.0772753	5.28604	1.24994e-07	2.06837e-06	Rps27a
ENSMUSG00000058258	1566.85	-0.478488	0.0905521	-5.28412	1.2631e-07	2.08781e-06	Idi1
ENSMUSG00000030029	1792.8	0.403735	0.0764485	5.28114	1.28381e-07	2.11966e-06	Lrig1
ENSMUSG00000040061	168.722	0.898873	0.170332	5.27717	1.31196e-07	2.16371e-06	Plcb2
ENSMUSG00000035960	1347.17	-0.437685	0.0829476	-5.27664	1.31575e-07	2.16753e-06	Apex1
ENSMUSG00000028284	1246.99	0.497089	0.0943991	5.26582	1.39563e-07	2.29654e-06	Map3k7
ENSMUSG00000043535	3026.15	-0.461716	0.0878179	-5.25765	1.45906e-07	2.39824e-06	Setx
ENSMUSG00000022139	433.405	-0.602872	0.114772	-5.25276	1.49835e-07	2.45674e-06	Mbnl2
ENSMUSG00000071644	22753.4	0.350186	0.0666673	5.25274	1.49855e-07	2.45674e-06	Eef1g
ENSMUSG00000032202	733.258	0.526528	0.100241	5.2526	1.49966e-07	2.45674e-06	Rab27a
ENSMUSG00000026872	80.7023	-1.35015	0.2571	-5.25145	1.5091e-07	2.46945e-06	Zeb2
ENSMUSG00000019437	11572.1	0.364944	0.0695153	5.24983	1.52238e-07	2.48841e-06	Tlcd1
ENSMUSG00000042350	1246.35	0.503381	0.0958947	5.24931	1.52666e-07	2.49264e-06	Arel1
ENSMUSG00000051413	1981.23	-0.415411	0.079198	-5.24522	1.56095e-07	2.5458e-06	Plagl2
ENSMUSG00000038611	1234.75	-0.442345	0.0843433	-5.24458	1.56638e-07	2.55184e-06	Phrf1
ENSMUSG00000022594	29.0269	2.55077	0.486742	5.24049	1.60147e-07	2.60611e-06	Lynx1
ENSMUSG00000026630	20.5075	-2.92359	0.557928	-5.24009	1.60497e-07	2.60892e-06	Batf3
ENSMUSG00000028228	905.948	-0.480852	0.0918362	-5.23598	1.64115e-07	2.66478e-06	Cpne3
ENSMUSG00000091133	1460.86	-0.437844	0.0836388	-5.23494	1.65039e-07	2.67684e-06	NA
ENSMUSG00000028207	42.8119	-1.88166	0.359716	-5.23097	1.68624e-07	2.73196e-06	Asph
ENSMUSG00000022768	109.075	-1.18871	0.227342	-5.2287	1.70704e-07	2.76262e-06	Ccdc116
ENSMUSG00000026514	35.9876	2.1456	0.410864	5.22218	1.76833e-07	2.85867e-06	Cnih3
ENSMUSG00000029635	843.401	-0.465965	0.0892489	-5.22096	1.77994e-07	2.87429e-06	Cdk8
ENSMUSG00000119956	22.5612	-2.8697	0.549752	-5.21999	1.78929e-07	2.88622e-06	NA
ENSMUSG00000036661	31.6985	-2.21138	0.424201	-5.21305	1.85763e-07	2.99317e-06	Dennd3
ENSMUSG00000043439	1074.8	-0.462266	0.0886825	-5.21259	1.86218e-07	2.99721e-06	Epop
ENSMUSG00000035199	1485.94	-0.419876	0.0805641	-5.2117	1.8712e-07	3.00844e-06	Arl6ip5
ENSMUSG00000060143	2893.72	0.538299	0.103339	5.20904	1.89819e-07	3.0485e-06	Gm10076
ENSMUSG00000030980	1022.97	-0.459356	0.0882143	-5.20728	1.91631e-07	3.07425e-06	Knop1
ENSMUSG00000082465	111.991	1.25965	0.242031	5.20452	1.94501e-07	3.1169e-06	Rps6-ps3
ENSMUSG00000039747	160.467	0.909941	0.174935	5.2016	1.97577e-07	3.16273e-06	Orai2
ENSMUSG00000035469	922.391	0.543217	0.104454	5.20052	1.98735e-07	3.17781e-06	Rcbtb1
ENSMUSG00000028613	245.087	-0.782571	0.150495	-5.19998	1.99313e-07	3.18286e-06	Lrp8
ENSMUSG00000025262	128.935	1.15511	0.222145	5.19982	1.99483e-07	3.18286e-06	Fam120c
ENSMUSG00000017858	339.809	0.667701	0.128611	5.19162	2.08475e-07	3.32273e-06	Ift52
ENSMUSG00000008475	4416.24	0.322316	0.0621547	5.1857	2.15209e-07	3.42634e-06	Arpc5
ENSMUSG00000067212	3047.38	-0.499586	0.0963657	-5.18427	2.1686e-07	3.44889e-06	H2-T23
ENSMUSG00000108353	371.207	0.665848	0.12848	5.1825	2.18937e-07	3.47817e-06	NA
ENSMUSG00000106990	116.324	-1.11807	0.215844	-5.18	2.21891e-07	3.52129e-06	NA
ENSMUSG00000060675	857.294	-0.521077	0.100619	-5.17873	2.23403e-07	3.54147e-06	Plaat3
ENSMUSG00000042015	140.574	0.947665	0.183017	5.17802	2.24253e-07	3.55111e-06	Wdr41
ENSMUSG00000021262	1216.42	0.472944	0.0913664	5.17634	2.26276e-07	3.57929e-06	Evl
ENSMUSG00000112907	35.1364	-2.09897	0.405616	-5.17477	2.28192e-07	3.60573e-06	NA
ENSMUSG00000026103	2277.42	-0.413213	0.0798988	-5.17171	2.31967e-07	3.66145e-06	Gls
ENSMUSG00000061787	9496.47	0.368871	0.0714183	5.16494	2.40519e-07	3.79236e-06	Rps17
ENSMUSG00000090958	55.0353	-1.67118	0.323719	-5.16243	2.43763e-07	3.83839e-06	Lrrc32
ENSMUSG00000004100	712.626	-0.516636	0.10008	-5.16223	2.44022e-07	3.83839e-06	Ppan
ENSMUSG00000043885	415.569	0.675034	0.130768	5.16208	2.44221e-07	3.83839e-06	Slc36a4
ENSMUSG00000026727	398.133	0.610074	0.1182	5.16138	2.45142e-07	3.84876e-06	Rsu1
ENSMUSG00000026305	1935.11	-0.399237	0.0773619	-5.16063	2.46116e-07	3.85992e-06	Lrrfip1
ENSMUSG00000079003	815.293	-0.469023	0.0909099	-5.15921	2.47997e-07	3.88292e-06	Samd1
ENSMUSG00000037321	4205.21	-0.397925	0.0771303	-5.15912	2.4811e-07	3.88292e-06	Tap1
ENSMUSG00000035697	1175.04	0.450093	0.0872764	5.15709	2.50816e-07	3.9211e-06	Arhgap45
ENSMUSG00000041180	119.943	-1.07599	0.20876	-5.15417	2.54758e-07	3.9785e-06	Hectd2
ENSMUSG00000004837	975.459	0.523048	0.10153	5.15168	2.58169e-07	4.02749e-06	Grap
ENSMUSG00000019845	164.618	-0.901865	0.175133	-5.1496	2.61045e-07	4.06804e-06	Tube1
ENSMUSG00000050965	2535.11	0.396319	0.0769684	5.1491	2.61733e-07	4.07444e-06	Prkca
ENSMUSG00000081855	145.894	1.09101	0.211999	5.14629	2.65689e-07	4.12943e-06	Rpl17-ps5
ENSMUSG00000054905	20.922	3.75004	0.728702	5.14619	2.65826e-07	4.12943e-06	Stfa3
ENSMUSG00000082016	55.8121	-1.66113	0.322807	-5.1459	2.66239e-07	4.12962e-06	NA
ENSMUSG00000021356	8624.39	-0.354929	0.0689747	-5.14579	2.664e-07	4.12962e-06	Irf4
ENSMUSG00000028893	418.642	0.699887	0.136042	5.14465	2.68021e-07	4.15038e-06	Sesn2
ENSMUSG00000050174	225.134	-0.760751	0.147953	-5.14184	2.72067e-07	4.2086e-06	Nudt6
ENSMUSG00000114708	16.4713	-3.69039	0.717866	-5.14078	2.73598e-07	4.22783e-06	NA
ENSMUSG00000021957	6253.52	-0.351677	0.0685082	-5.13336	2.84622e-07	4.39357e-06	Tkt
ENSMUSG00000016487	249.189	0.947975	0.184732	5.13161	2.87269e-07	4.42979e-06	Ppfibp1
ENSMUSG00000071176	89.7417	-1.20118	0.234137	-5.13026	2.89348e-07	4.45717e-06	Arhgef10
ENSMUSG00000031422	2389.61	-0.364411	0.0710581	-5.12836	2.92284e-07	4.49768e-06	Morf4l2
ENSMUSG00000033285	1419.72	-0.425517	0.0829908	-5.12727	2.9397e-07	4.51891e-06	Wdr3
ENSMUSG00000078570	437.719	-0.588806	0.114843	-5.12705	2.94311e-07	4.51943e-06	1110065P20Rik
ENSMUSG00000090030	62.1433	-1.4091	0.274869	-5.12644	2.95267e-07	4.52938e-06	NA
ENSMUSG00000021585	1450.67	0.401778	0.0783992	5.12478	2.9789e-07	4.56485e-06	Cast
ENSMUSG00000028943	297.653	-0.733778	0.143191	-5.12445	2.98404e-07	4.56797e-06	Espn
ENSMUSG00000030745	1189.92	0.430471	0.0840679	5.12052	3.04699e-07	4.65675e-06	Il21r
ENSMUSG00000050379	1816.68	0.383852	0.0749649	5.12043	3.04837e-07	4.65675e-06	Septin6
ENSMUSG00000064138	734.088	0.515539	0.100734	5.11783	3.09071e-07	4.71654e-06	Fam172a
ENSMUSG00000030744	28094.5	0.36276	0.070955	5.11253	3.17867e-07	4.84574e-06	Rps3
ENSMUSG00000031129	32.6262	2.07092	0.405148	5.11151	3.196e-07	4.86712e-06	Slc9a9
ENSMUSG00000047676	1768.82	1.17723	0.230323	5.11121	3.20108e-07	4.86982e-06	Rpsa-ps10
ENSMUSG00000068101	335.706	0.643914	0.125993	5.11072	3.2093e-07	4.87728e-06	Cenpm
ENSMUSG00000115685	6618.06	0.378096	0.0741086	5.10192	3.36227e-07	5.10447e-06	NA
ENSMUSG00000049957	196.064	-0.793132	0.155487	-5.10093	3.3798e-07	5.12158e-06	Ccdc137
ENSMUSG00000028128	40.46	-1.87167	0.366929	-5.1009	3.3805e-07	5.12158e-06	F3
ENSMUSG00000101970	101.952	-1.16459	0.228358	-5.09985	3.39931e-07	5.14478e-06	Chaserr
ENSMUSG00000055681	1078.68	-0.443396	0.0869706	-5.09822	3.42857e-07	5.18372e-06	Cope
ENSMUSG00000068290	492.871	0.553062	0.108521	5.09635	3.4627e-07	5.22995e-06	Ddrgk1
ENSMUSG00000020538	1434.87	-0.43176	0.0847288	-5.09579	3.47294e-07	5.24004e-06	Srebf1
ENSMUSG00000026104	1113.41	0.466202	0.0915609	5.09171	3.54841e-07	5.34843e-06	Stat1
ENSMUSG00000052539	234.647	0.80837	0.158947	5.0858	3.66084e-07	5.51224e-06	Magi3
ENSMUSG00000030802	399.846	0.614655	0.120924	5.08297	3.71571e-07	5.58914e-06	Bckdk
ENSMUSG00000041459	4895.93	-0.316282	0.0623279	-5.07448	3.88555e-07	5.83865e-06	Tardbp
ENSMUSG00000041954	1761.12	-0.420727	0.0829325	-5.07313	3.91326e-07	5.87429e-06	Tnfrsf18
ENSMUSG00000080776	364.31	0.809713	0.159618	5.07282	3.91956e-07	5.87774e-06	Gm12174
ENSMUSG00000031207	8550.56	0.292748	0.0577116	5.07261	3.92391e-07	5.87827e-06	Msn
ENSMUSG00000116678	19.1276	-3.06534	0.605202	-5.06499	4.08423e-07	6.11222e-06	NA
ENSMUSG00000006373	1180.82	0.414624	0.0818712	5.06435	4.09799e-07	6.12659e-06	Pgrmc1
ENSMUSG00000091366	173.146	-0.85205	0.168262	-5.06383	4.10927e-07	6.1372e-06	NA
ENSMUSG00000027712	1152.47	0.549968	0.108683	5.06028	4.18651e-07	6.24623e-06	Anxa5
ENSMUSG00000004952	37.7981	-1.93811	0.383023	-5.06002	4.19211e-07	6.24823e-06	Rasa4
ENSMUSG00000031441	754.837	-0.569779	0.112624	-5.0591	4.21237e-07	6.27208e-06	Atp11a
ENSMUSG00000046330	5575.61	0.407341	0.0805532	5.05679	4.26369e-07	6.34208e-06	Rpl37a
ENSMUSG00000021675	24.4528	-2.73291	0.540833	-5.05315	4.34587e-07	6.45778e-06	F2rl2
ENSMUSG00000039989	390.687	0.729812	0.144528	5.04962	4.42691e-07	6.57157e-06	Cbx4
ENSMUSG00000003808	1028.65	-0.493544	0.09778	-5.04749	4.47643e-07	6.63576e-06	Farsa
ENSMUSG00000051790	150.208	-0.98845	0.195834	-5.04738	4.47917e-07	6.63576e-06	Nlgn2
ENSMUSG00000054150	335.977	0.686277	0.136033	5.04492	4.53713e-07	6.71486e-06	Syne3
ENSMUSG00000120986	261.711	0.702185	0.13925	5.04263	4.59171e-07	6.78881e-06	NA
ENSMUSG00000005233	407.535	0.65816	0.130596	5.03966	4.66366e-07	6.88057e-06	Spc25
ENSMUSG00000026778	1347.97	0.469351	0.0931328	5.03959	4.66528e-07	6.88057e-06	Prkcq
ENSMUSG00000116262	118.238	-1.03996	0.206367	-5.03935	4.67117e-07	6.88057e-06	NA
ENSMUSG00000035314	100.484	1.21608	0.24132	5.0393	4.67248e-07	6.88057e-06	Gdpd5
ENSMUSG00000034620	375.656	0.607347	0.120622	5.03511	4.77574e-07	7.02559e-06	Rxylt1
ENSMUSG00000050953	55.8034	-1.49214	0.296692	-5.02926	4.92374e-07	7.23608e-06	Gja1
ENSMUSG00000044783	2226.99	-0.415103	0.0825904	-5.02605	5.00694e-07	7.35101e-06	A730008H23Rik
ENSMUSG00000044783	2226.99	-0.415103	0.0825904	-5.02605	5.00694e-07	7.35101e-06	Hjurp
ENSMUSG00000045411	173.655	-0.91429	0.181954	-5.02486	5.03812e-07	7.3894e-06	2410002F23Rik
ENSMUSG00000022462	2181.01	-0.46108	0.0917849	-5.02349	5.07411e-07	7.43479e-06	Slc38a2
ENSMUSG00000020661	3343.29	0.401967	0.0800297	5.02273	5.09434e-07	7.457e-06	Dnmt3a
ENSMUSG00000074796	47.6469	1.85606	0.369692	5.02054	5.15264e-07	7.5342e-06	Slc4a11
ENSMUSG00000002033	1929.52	0.43509	0.0866651	5.02037	5.15732e-07	7.5342e-06	Cd3g
ENSMUSG00000074129	622.009	0.668305	0.133173	5.01833	5.21223e-07	7.60686e-06	Rpl13a
ENSMUSG00000035781	817.817	0.457737	0.0913046	5.0133	5.35054e-07	7.80097e-06	R3hdm4
ENSMUSG00000053012	486.541	0.573239	0.114375	5.01194	5.3884e-07	7.8484e-06	Krcc1
ENSMUSG00000033623	427.716	-0.574764	0.114703	-5.0109	5.41767e-07	7.88322e-06	Pcgf3
ENSMUSG00000066877	217.641	-0.808363	0.161368	-5.00943	5.45923e-07	7.93584e-06	Nck2
ENSMUSG00000032089	216.177	-2.35895	0.471113	-5.00719	5.523e-07	8.02061e-06	Il10ra
ENSMUSG00000068120	67.7736	1.49305	0.298272	5.00568	5.56651e-07	8.07583e-06	NA
ENSMUSG00000002983	704.535	0.482813	0.0965597	5.00015	5.72854e-07	8.30271e-06	Relb
ENSMUSG00000050357	937.277	0.461377	0.0922804	4.99973	5.74117e-07	8.31283e-06	Carmil2
ENSMUSG00000067288	4862.89	0.464513	0.0929186	4.99914	5.75878e-07	8.33013e-06	Rps28
ENSMUSG00000028911	1567.61	-0.392152	0.0785127	-4.99476	5.891e-07	8.51302e-06	Srsf4
ENSMUSG00000078429	1300.3	0.391484	0.0783891	4.99411	5.91085e-07	8.53332e-06	Ctdsp2
ENSMUSG00000017861	985.045	-0.44473	0.0890794	-4.99251	5.95982e-07	8.59558e-06	Mybl2
ENSMUSG00000036087	1198.8	0.401574	0.0804385	4.99231	5.96611e-07	8.59623e-06	Slain2
ENSMUSG00000073555	93.3025	-1.35105	0.270703	-4.99088	6.01036e-07	8.65151e-06	Gm4951
ENSMUSG00000007850	3299.4	-0.332818	0.0667059	-4.98934	6.0586e-07	8.71243e-06	Hnrnph1
ENSMUSG00000020333	30.0066	-2.17255	0.435558	-4.98797	6.10179e-07	8.76595e-06	Acsl6
ENSMUSG00000010608	2203.23	-0.406804	0.0815986	-4.98542	6.18262e-07	8.87341e-06	Rbm25
ENSMUSG00000026034	529.242	-0.547847	0.10992	-4.98406	6.22648e-07	8.92766e-06	Clk1
ENSMUSG00000024533	101.079	-1.1119	0.223162	-4.98249	6.27711e-07	8.99149e-06	Spire1
ENSMUSG00000057738	3499.26	0.391515	0.0785964	4.98133	6.31476e-07	9.03661e-06	Sptan1
ENSMUSG00000036863	158.662	-0.886102	0.177969	-4.97897	6.39248e-07	9.13894e-06	Syde2
ENSMUSG00000028759	1357.51	0.391331	0.0786738	4.9741	6.55523e-07	9.36252e-06	Hp1bp3
ENSMUSG00000055044	894.674	0.478756	0.096284	4.97233	6.61538e-07	9.43927e-06	Pdlim1
ENSMUSG00000031320	25660	0.318908	0.0641465	4.97156	6.64169e-07	9.4605e-06	Rps4x
ENSMUSG00000057841	11120.5	0.360342	0.0724813	4.97152	6.64312e-07	9.4605e-06	Rpl32
ENSMUSG00000020385	251.117	-0.7828	0.157635	-4.96591	6.83785e-07	9.72839e-06	Clk4
ENSMUSG00000038607	504.379	0.572604	0.115445	4.95998	7.05019e-07	1.00208e-05	Gng10
ENSMUSG00000038740	134.281	0.930804	0.187759	4.95745	7.14256e-07	1.01423e-05	Mvb12b
ENSMUSG00000006519	1488.76	0.406698	0.0820932	4.9541	7.26656e-07	1.03084e-05	Cyba
ENSMUSG00000030779	1650.22	-0.394474	0.0796401	-4.95321	7.29988e-07	1.03457e-05	Rbbp6
ENSMUSG00000035900	612.503	-0.523416	0.105738	-4.95014	7.41614e-07	1.05004e-05	Gramd4
ENSMUSG00000002379	354.411	0.644454	0.130298	4.94599	7.57574e-07	1.07091e-05	Ndufa11
ENSMUSG00000015341	963.597	-0.459604	0.0929257	-4.94593	7.57809e-07	1.07091e-05	Golga7
ENSMUSG00000015341	963.597	-0.459604	0.0929257	-4.94593	7.57809e-07	1.07091e-05	Gm6829
ENSMUSG00000062054	196.446	0.844354	0.170829	4.94268	7.7056e-07	1.08788e-05	Iah1
ENSMUSG00000081400	234.061	0.830482	0.168066	4.9414	7.75655e-07	1.09402e-05	Gm13680
ENSMUSG00000041881	644.159	0.522993	0.105867	4.94009	7.80871e-07	1.10033e-05	Ndufa7
ENSMUSG00000002781	123.778	0.995472	0.201546	4.93918	7.84505e-07	1.10364e-05	Tmem143
ENSMUSG00000037260	207.416	0.803376	0.162656	4.93911	7.84798e-07	1.10364e-05	Hgsnat
ENSMUSG00000052821	14.1464	-4.30531	0.871707	-4.93894	7.85474e-07	1.10364e-05	Cysltr1
ENSMUSG00000034832	1482.61	0.451896	0.0915162	4.93788	7.89746e-07	1.10858e-05	Tet3
ENSMUSG00000044456	554.891	0.540283	0.109474	4.93527	8.00385e-07	1.12142e-05	Rin3
ENSMUSG00000039384	140.727	0.917726	0.185953	4.93527	8.00416e-07	1.12142e-05	Dusp10
ENSMUSG00000038128	482.411	-0.559607	0.113408	-4.93446	8.03729e-07	1.12499e-05	Camk4
ENSMUSG00000022385	927.549	0.580829	0.117714	4.93424	8.04652e-07	1.12521e-05	Gtse1
ENSMUSG00000002222	1648.36	0.378884	0.0768111	4.93267	8.11129e-07	1.13222e-05	Rmnd5a
ENSMUSG00000024594	374.391	0.601832	0.12201	4.93265	8.11199e-07	1.13222e-05	Prrc1
ENSMUSG00000033799	622.166	-0.631545	0.12812	-4.92934	8.2508e-07	1.1505e-05	Tasor2
ENSMUSG00000120356	125.957	-1.06978	0.217173	-4.9259	8.39723e-07	1.16981e-05	NA
ENSMUSG00000023764	152.24	-0.970473	0.197082	-4.92421	8.46999e-07	1.17883e-05	Sfi1
ENSMUSG00000029016	93.0697	-1.19382	0.242767	-4.91754	8.76387e-07	1.21857e-05	Clcn6
ENSMUSG00000038279	2210.02	-0.369498	0.0752273	-4.91175	9.02659e-07	1.2538e-05	Nop2
ENSMUSG00000067377	71.6925	-1.29161	0.262984	-4.91139	9.04353e-07	1.2538e-05	Tspan6
ENSMUSG00000028551	465.001	0.546936	0.111363	4.91131	9.04718e-07	1.2538e-05	Cdkn2c
ENSMUSG00000047415	450.2	0.779598	0.158738	4.91122	9.05131e-07	1.2538e-05	Gpr68
ENSMUSG00000080904	44.9198	1.95239	0.397667	4.90963	9.12495e-07	1.26281e-05	NA
ENSMUSG00000070692	43.7562	1.72306	0.351215	4.906	9.29513e-07	1.28516e-05	Rps12-ps10
ENSMUSG00000059248	3310.78	-0.324369	0.0662927	-4.89298	9.93184e-07	1.3719e-05	Septin9
ENSMUSG00000035021	2164.86	-0.391396	0.0799998	-4.89246	9.95813e-07	1.37424e-05	Baz1a
ENSMUSG00000032020	1667.45	0.448179	0.0917492	4.88482	1.03523e-06	1.4273e-05	Ubash3b
ENSMUSG00000038827	482.7	0.563098	0.115518	4.87457	1.09047e-06	1.50205e-05	Abitram
ENSMUSG00000020589	231.061	0.820015	0.168265	4.87334	1.09725e-06	1.50997e-05	Cyria
ENSMUSG00000020523	483.572	-0.556138	0.114232	-4.86851	1.1244e-06	1.5459e-05	Fam114a2
ENSMUSG00000040621	254.208	-0.750793	0.154238	-4.86776	1.12872e-06	1.55039e-05	Gemin8
ENSMUSG00000036875	334.712	-0.629124	0.129306	-4.8654	1.14225e-06	1.5675e-05	Dna2
ENSMUSG00000000149	410.438	0.670219	0.137773	4.86466	1.14652e-06	1.5719e-05	Gna12
ENSMUSG00000024222	891.566	-0.527268	0.108399	-4.86413	1.14962e-06	1.57467e-05	Fkbp5
ENSMUSG00000052949	273.995	0.843811	0.173489	4.86378	1.15166e-06	1.576e-05	Rnf157
ENSMUSG00000022312	6222.8	0.341306	0.0702546	4.85813	1.18499e-06	1.6201e-05	Eif3h
ENSMUSG00000009555	1005.6	-0.442675	0.0911258	-4.85785	1.1867e-06	1.62094e-05	Cdk9
ENSMUSG00000068923	218.806	0.776011	0.159909	4.85282	1.21719e-06	1.66105e-05	Syt11
ENSMUSG00000067931	124.556	-1.06038	0.218695	-4.84868	1.24284e-06	1.69447e-05	Zfp948
ENSMUSG00000086754	1509.2	-0.431439	0.0890889	-4.84279	1.28026e-06	1.74388e-05	NA
ENSMUSG00000027475	923.734	-0.422036	0.087214	-4.83908	1.3044e-06	1.77511e-05	Kif3b
ENSMUSG00000032322	487.271	-0.578293	0.119523	-4.83834	1.30929e-06	1.78012e-05	Pstpip1
ENSMUSG00000050912	1372.77	0.416815	0.0862124	4.83474	1.33319e-06	1.81094e-05	Tmem123
ENSMUSG00000010025	191.938	0.788683	0.163156	4.83391	1.3388e-06	1.81688e-05	Aldh3a2
ENSMUSG00000039298	492.736	0.565496	0.117105	4.82896	1.37247e-06	1.86086e-05	Cdk5rap2
ENSMUSG00000085105	194.103	-0.764213	0.158317	-4.82711	1.3853e-06	1.87653e-05	Gm12758
ENSMUSG00000012126	745.106	0.461595	0.0956327	4.82674	1.38783e-06	1.87824e-05	Ubxn11
ENSMUSG00000058600	8138.86	0.346913	0.0719241	4.82331	1.41193e-06	1.9091e-05	Rpl30
ENSMUSG00000022951	154.209	0.86089	0.17856	4.8213	1.42628e-06	1.92624e-05	Rcan1
ENSMUSG00000111329	350.656	0.616605	0.127896	4.82116	1.42723e-06	1.92624e-05	A830035O19Rik
ENSMUSG00000079363	1360.11	-0.506877	0.105173	-4.81946	1.43947e-06	1.94097e-05	Gbp4
ENSMUSG00000032849	341.193	0.680737	0.141311	4.8173	1.45513e-06	1.95952e-05	Abcc4
ENSMUSG00000076498	2275.52	0.4414	0.09163	4.8172	1.45588e-06	1.95952e-05	Trbc2
ENSMUSG00000033031	796.809	-0.456595	0.0948061	-4.81609	1.46395e-06	1.96858e-05	Cip2a
ENSMUSG00000121075	95.6308	-1.06347	0.220864	-4.81506	1.47152e-06	1.97694e-05	NA
ENSMUSG00000060639	233.795	0.735653	0.152907	4.81111	1.50098e-06	2.01468e-05	H4c9
ENSMUSG00000022637	2291.39	-0.521362	0.108511	-4.8047	1.54983e-06	2.07836e-05	Cblb
ENSMUSG00000000782	2457.75	0.397663	0.082831	4.8009	1.57952e-06	2.11547e-05	Tcf7
ENSMUSG00000025290	11907.4	0.34543	0.0719528	4.80079	1.58038e-06	2.11547e-05	Rps24
ENSMUSG00000042766	39.7041	-1.70024	0.354613	-4.79463	1.62977e-06	2.1796e-05	Trim46
ENSMUSG00000026077	80.6153	-1.25362	0.261801	-4.78843	1.68091e-06	2.24595e-05	Npas2
ENSMUSG00000034903	149.277	0.849335	0.177432	4.78681	1.6945e-06	2.26205e-05	Cobll1
ENSMUSG00000068882	2804.37	-0.340662	0.0711705	-4.78655	1.69669e-06	2.26291e-05	Ssb
ENSMUSG00000051331	22.4899	-2.50159	0.523114	-4.78212	1.73459e-06	2.31034e-05	Cacna1c
ENSMUSG00000110275	419.951	0.729397	0.152529	4.78202	1.73538e-06	2.31034e-05	Gm5905
ENSMUSG00000040268	228.061	0.783167	0.163816	4.78077	1.74626e-06	2.32272e-05	Plekha1
ENSMUSG00000030528	729.928	-0.460859	0.0964389	-4.77876	1.76377e-06	2.34389e-05	Blm
ENSMUSG00000114797	712.907	-0.47132	0.0986549	-4.77747	1.77517e-06	2.3569e-05	Nup58
ENSMUSG00000037270	824.175	-0.666969	0.13967	-4.7753	1.79435e-06	2.38023e-05	Bltp1
ENSMUSG00000087700	757.538	-0.515774	0.108019	-4.77485	1.79843e-06	2.38348e-05	NA
ENSMUSG00000005089	45.0429	-1.64891	0.345352	-4.77459	1.80074e-06	2.38441e-05	Slc1a2
ENSMUSG00000001700	194.18	0.838931	0.175731	4.77396	1.80641e-06	2.38976e-05	Gramd2b
ENSMUSG00000070305	601.712	-0.592444	0.124137	-4.7725	1.81949e-06	2.4049e-05	Mpzl3
ENSMUSG00000048852	72.2965	-1.26731	0.26559	-4.77166	1.82715e-06	2.41285e-05	Gm12185
ENSMUSG00000075511	41.2842	-1.80969	0.379307	-4.77105	1.83265e-06	2.41795e-05	NA
ENSMUSG00000071415	11066.4	0.330722	0.0693299	4.77026	1.83989e-06	2.42532e-05	Rpl23
ENSMUSG00000018008	640.661	-0.655843	0.137628	-4.76534	1.88536e-06	2.48304e-05	Cyth4
ENSMUSG00000031367	422.219	0.575399	0.120768	4.76448	1.89345e-06	2.49146e-05	Ap1s2
ENSMUSG00000109324	3191.11	-0.365325	0.0766952	-4.76334	1.90411e-06	2.50325e-05	Prmt1
ENSMUSG00000103587	7.80828	6.45267	1.35503	4.762	1.91685e-06	2.51774e-05	Gm38326
ENSMUSG00000030512	637.78	-0.505422	0.106163	-4.76082	1.92811e-06	2.53028e-05	Snrpa1
ENSMUSG00000038256	516.847	-0.53708	0.112918	-4.75636	1.97118e-06	2.5845e-05	Bcl9
ENSMUSG00000060438	149.476	1.12394	0.236481	4.75276	2.00655e-06	2.62853e-05	Rps10-ps1
ENSMUSG00000001052	1176.98	-0.395046	0.0831366	-4.75177	2.01648e-06	2.63918e-05	Sec24b
ENSMUSG00000032845	51.9544	-1.54209	0.324682	-4.74955	2.03865e-06	2.66583e-05	Alpk2
ENSMUSG00000020183	453.942	-0.720419	0.151696	-4.74909	2.04339e-06	2.66803e-05	Cpm
ENSMUSG00000037868	1154.17	-0.396989	0.0835936	-4.74903	2.04396e-06	2.66803e-05	Egr2
ENSMUSG00000055194	34.7829	-1.78442	0.376207	-4.7432	2.10371e-06	2.74358e-05	Actbl2
ENSMUSG00000015932	340.083	0.59427	0.125297	4.74289	2.10688e-06	2.74528e-05	Dstn
ENSMUSG00000027540	3106.75	-0.329086	0.069429	-4.73989	2.13834e-06	2.78382e-05	Ptpn1
ENSMUSG00000056413	167.669	-0.826297	0.174359	-4.73905	2.14719e-06	2.79287e-05	Adap1
ENSMUSG00000019982	445.928	0.60096	0.126914	4.73519	2.18855e-06	2.84415e-05	Myb
ENSMUSG00000120629	67.8601	1.23769	0.261421	4.73449	2.19607e-06	2.8514e-05	NA
ENSMUSG00000027698	217.745	0.730436	0.154292	4.73411	2.20022e-06	2.85428e-05	Nceh1
ENSMUSG00000085023	514.561	-0.535451	0.113133	-4.73292	2.21313e-06	2.86618e-05	NA
ENSMUSG00000008683	9895.44	0.372649	0.0787358	4.7329	2.2133e-06	2.86618e-05	Rps15a
ENSMUSG00000005103	4376.55	0.301923	0.0638003	4.7323	2.21985e-06	2.87214e-05	Wdr1
ENSMUSG00000030987	1022.91	0.409433	0.0865271	4.73184	2.2249e-06	2.87614e-05	Stim1
ENSMUSG00000039715	101.877	1.04229	0.220307	4.73107	2.23345e-06	2.88466e-05	Dync2i2
ENSMUSG00000026548	14.0715	3.51799	0.743716	4.73028	2.24207e-06	2.89325e-05	Slamf9
ENSMUSG00000089998	261.858	-0.667134	0.141042	-4.73004	2.24479e-06	2.89423e-05	Phtf1os
ENSMUSG00000025224	791.793	0.477386	0.100936	4.72958	2.24983e-06	2.89683e-05	Gbf1
ENSMUSG00000033769	222.057	0.725154	0.153326	4.7295	2.25075e-06	2.89683e-05	Exoc6b
ENSMUSG00000098557	87.0255	1.19295	0.25238	4.72682	2.28064e-06	2.93274e-05	Kctd12
ENSMUSG00000013465	897.513	-0.423571	0.0896367	-4.72542	2.29641e-06	2.94894e-05	Nelfb
ENSMUSG00000029632	1618.92	0.398516	0.0843358	4.72534	2.29725e-06	2.94894e-05	Ndufa4
ENSMUSG00000031198	741.377	0.457504	0.0968286	4.72489	2.30239e-06	2.95296e-05	Fundc2
ENSMUSG00000001569	720.739	-0.504085	0.106825	-4.71881	2.37227e-06	3.03994e-05	Nom1
ENSMUSG00000050106	1360.27	0.390478	0.0827639	4.71798	2.382e-06	3.04975e-05	Tmc8
ENSMUSG00000030410	260.875	-0.689549	0.146223	-4.71573	2.40842e-06	3.08089e-05	Dmwd
ENSMUSG00000001418	371.363	0.564471	0.119739	4.7142	2.4266e-06	3.10146e-05	Glmp
ENSMUSG00000016181	719.485	-0.445419	0.094536	-4.71164	2.45732e-06	3.13799e-05	Utp25
ENSMUSG00000039450	49.9607	1.55574	0.330205	4.71144	2.45967e-06	3.13827e-05	Dcxr
ENSMUSG00000054978	13.1383	-3.85828	0.818957	-4.71121	2.46256e-06	3.13923e-05	Kbtbd13
ENSMUSG00000024349	1673.16	-0.436177	0.092588	-4.71095	2.46565e-06	3.14044e-05	Sting1
ENSMUSG00000087381	1412.25	-0.412157	0.0874992	-4.7104	2.47227e-06	3.14451e-05	NA
ENSMUSG00000022564	239.83	0.679277	0.14421	4.71033	2.47311e-06	3.14451e-05	Grina
ENSMUSG00000020994	2148.23	-0.336919	0.0715557	-4.70849	2.49561e-06	3.16799e-05	Pnn
ENSMUSG00000028030	197.852	0.755521	0.16046	4.70847	2.49588e-06	3.16799e-05	Tbck
ENSMUSG00000029714	255.651	-0.717564	0.152413	-4.70802	2.50136e-06	3.17219e-05	Gigyf1
ENSMUSG00000090024	34.8587	-1.78769	0.379758	-4.70745	2.5084e-06	3.17838e-05	NA
ENSMUSG00000029233	225.114	0.6937	0.1474	4.70624	2.52334e-06	3.19456e-05	Srd5a3
ENSMUSG00000033316	35.0035	-1.93066	0.410494	-4.70326	2.56039e-06	3.23869e-05	Galnt9
ENSMUSG00000026821	228.545	-0.704965	0.149935	-4.7018	2.57881e-06	3.25731e-05	Ralgds
ENSMUSG00000091272	433.898	0.583932	0.124195	4.70174	2.57954e-06	3.25731e-05	NA
ENSMUSG00000024539	626.854	-0.500642	0.106519	-4.70001	2.60146e-06	3.28216e-05	Ptpn2
ENSMUSG00000009035	421.105	0.569874	0.121319	4.69731	2.6361e-06	3.32303e-05	Tmem184b
ENSMUSG00000024639	556.556	0.560566	0.119382	4.69557	2.6586e-06	3.34852e-05	Gnaq
ENSMUSG00000036339	353.06	0.571312	0.121705	4.69423	2.67618e-06	3.36523e-05	Tmem260
ENSMUSG00000033102	230.12	-0.831355	0.177104	-4.69416	2.67707e-06	3.36523e-05	Cdc14b
ENSMUSG00000032449	349.007	-0.612709	0.130529	-4.69403	2.67874e-06	3.36523e-05	Slc25a36
ENSMUSG00000031144	32.7441	1.85649	0.39565	4.69226	2.70209e-06	3.39168e-05	Syp
ENSMUSG00000031278	2519.71	-0.324587	0.069212	-4.68975	2.73541e-06	3.43057e-05	Acsl4
ENSMUSG00000056214	159.041	0.821548	0.175234	4.68829	2.75499e-06	3.45218e-05	Pard6g
ENSMUSG00000001918	2195.65	0.349518	0.0745752	4.68679	2.77524e-06	3.4746e-05	Slc1a5
ENSMUSG00000037815	1230.19	-0.388186	0.0828328	-4.68638	2.78082e-06	3.47862e-05	Ctnna1
ENSMUSG00000036057	467.594	-0.529233	0.113038	-4.68191	2.84216e-06	3.55233e-05	Ptpn23
ENSMUSG00000036990	1312.69	-0.482568	0.103146	-4.67848	2.89006e-06	3.60875e-05	Otud4
ENSMUSG00000036019	42.6609	-1.6108	0.344311	-4.67833	2.8922e-06	3.60875e-05	Tmtc2
ENSMUSG00000099471	207.919	0.886023	0.189414	4.6777	2.90115e-06	3.61684e-05	Gm8451
ENSMUSG00000107659	616.943	0.49414	0.105675	4.67604	2.92461e-06	3.64301e-05	NA
ENSMUSG00000012535	1878.8	-0.362929	0.0776482	-4.67401	2.95372e-06	3.67615e-05	Tnpo3
ENSMUSG00000037108	104.202	1.02746	0.219952	4.6713	2.99304e-06	3.72194e-05	Zcwpw1
ENSMUSG00000024308	2686.79	0.321632	0.0688592	4.67086	2.99936e-06	3.72665e-05	Tapbp
ENSMUSG00000066632	61.069	-1.41118	0.302327	-4.66772	3.04562e-06	3.78094e-05	NA
ENSMUSG00000025283	799.488	-0.587261	0.125827	-4.66721	3.05316e-06	3.7871e-05	Sat1
ENSMUSG00000026202	2727.22	-0.403861	0.0865901	-4.66405	3.10042e-06	3.84248e-05	Tuba4a
ENSMUSG00000110899	81.5921	-1.19193	0.255673	-4.66193	3.13262e-06	3.87913e-05	NA
ENSMUSG00000039316	601.534	0.502196	0.107823	4.65759	3.19937e-06	3.95845e-05	Rftn1
ENSMUSG00000025869	1084.56	-0.393199	0.0844251	-4.65737	3.20277e-06	3.95933e-05	Nop16
ENSMUSG00000024007	1324.37	-0.365763	0.0785629	-4.65567	3.22927e-06	3.98874e-05	Ppil1
ENSMUSG00000056687	563.194	-0.621784	0.133606	-4.65386	3.25776e-06	4.02054e-05	Gm11696
ENSMUSG00000001751	148.651	0.886332	0.190559	4.65123	3.29966e-06	4.06885e-05	Naglu
ENSMUSG00000064262	523.141	-0.507557	0.109135	-4.65074	3.30751e-06	4.07511e-05	Gimap8
ENSMUSG00000024338	3585.76	-0.467318	0.10053	-4.64856	3.34267e-06	4.11498e-05	Psmb8
ENSMUSG00000027889	1103.24	-0.432394	0.0930218	-4.64831	3.34663e-06	4.11641e-05	Ampd2
ENSMUSG00000004328	17.1075	-2.87648	0.619034	-4.64672	3.37252e-06	4.14479e-05	Hif3a
ENSMUSG00000034560	385.339	-0.565751	0.121758	-4.64652	3.37574e-06	4.14529e-05	Washc4
ENSMUSG00000071552	641.897	-0.559869	0.120584	-4.64299	3.43397e-06	4.21327e-05	Tigit
ENSMUSG00000039047	465.095	0.51205	0.110324	4.64133	3.46167e-06	4.24371e-05	Pigk
ENSMUSG00000049232	695.991	-1.14041	0.245785	-4.63986	3.48639e-06	4.27047e-05	Tigd2
ENSMUSG00000021222	141.607	0.938837	0.202357	4.63951	3.49237e-06	4.27423e-05	Dcaf4
ENSMUSG00000028832	2761.32	0.357212	0.077027	4.63749	3.52663e-06	4.31257e-05	Stmn1
ENSMUSG00000057191	52.765	1.40872	0.303794	4.63711	3.5332e-06	4.31702e-05	AB124611
ENSMUSG00000071369	428.125	0.549099	0.118456	4.63547	3.56122e-06	4.34765e-05	Map3k5
ENSMUSG00000031513	1260.14	0.383682	0.0828062	4.63349	3.59553e-06	4.38589e-05	Leprotl1
ENSMUSG00000027368	2329.01	0.389512	0.0840941	4.63186	3.62397e-06	4.41692e-05	Dusp2
ENSMUSG00000023991	2054.01	0.354996	0.0766506	4.63135	3.63281e-06	4.42403e-05	Foxp4
ENSMUSG00000029415	1285.58	-0.432983	0.0935477	-4.62847	3.6837e-06	4.48229e-05	Sdad1
ENSMUSG00000002944	20.7143	-2.52811	0.546653	-4.6247	3.75135e-06	4.5573e-05	Cd36
ENSMUSG00000026558	3833.23	-0.327629	0.0708442	-4.62463	3.7526e-06	4.5573e-05	Uck2
ENSMUSG00000004207	3029.6	0.321285	0.0694743	4.62452	3.75464e-06	4.5573e-05	Psap
ENSMUSG00000008200	691.543	-0.479634	0.103757	-4.62265	3.78872e-06	4.59487e-05	Fnbp4
ENSMUSG00000022791	595.495	0.466167	0.100859	4.62197	3.80122e-06	4.60624e-05	Tnk2
ENSMUSG00000115505	44.5284	-1.53588	0.33232	-4.62167	3.80658e-06	4.60894e-05	NA
ENSMUSG00000022967	509.827	0.572346	0.123903	4.61932	3.84998e-06	4.65765e-05	Ifnar1
ENSMUSG00000032883	295.94	-0.755311	0.163522	-4.61901	3.85572e-06	4.66076e-05	Acsl3
ENSMUSG00000033730	2179.13	0.396777	0.085916	4.6182	3.87079e-06	4.67513e-05	Egr3
ENSMUSG00000006333	19867.6	0.346556	0.0750556	4.61732	3.88721e-06	4.69111e-05	Rps9
ENSMUSG00000033228	2598.34	-0.332761	0.0720753	-4.61686	3.89595e-06	4.69781e-05	Scaf11
ENSMUSG00000041607	2239.68	0.456961	0.0989903	4.61622	3.90788e-06	4.70834e-05	Mbp
ENSMUSG00000022218	14.7305	-3.29378	0.71376	-4.61469	3.93691e-06	4.73943e-05	Tgm1
ENSMUSG00000039264	1933.37	-0.425603	0.0922496	-4.61361	3.95742e-06	4.76023e-05	Gimap3
ENSMUSG00000029101	67.7136	1.50613	0.326621	4.61125	4.00262e-06	4.81066e-05	Rgs12
ENSMUSG00000033256	62.8395	1.2815	0.278024	4.60931	4.04009e-06	4.85173e-05	Shf
ENSMUSG00000044149	397.771	-0.552763	0.119968	-4.6076	4.07337e-06	4.88771e-05	Nkrf
ENSMUSG00000010755	955.575	0.547171	0.118844	4.60409	4.14266e-06	4.9668e-05	Cars
ENSMUSG00000048521	14.2541	3.54962	0.771157	4.60299	4.16477e-06	4.98924e-05	Cxcr6
ENSMUSG00000040435	193.687	-0.789133	0.171887	-4.59099	4.41144e-06	5.28044e-05	Ppp1r15a
ENSMUSG00000019838	447.088	0.562282	0.122482	4.59074	4.41669e-06	5.28243e-05	Slc16a10
ENSMUSG00000027763	6707.56	0.331442	0.0722272	4.58889	4.45614e-06	5.32529e-05	Mbnl1
ENSMUSG00000117359	38.7924	-1.65691	0.361167	-4.58765	4.48267e-06	5.34944e-05	NA
ENSMUSG00000085667	1399.56	-0.398932	0.0869611	-4.58747	4.48647e-06	5.34944e-05	Gm12992
ENSMUSG00000026491	1619.7	-0.418605	0.0912503	-4.58743	4.48726e-06	5.34944e-05	Ahctf1
ENSMUSG00000058546	11842.9	0.330506	0.0720574	4.58671	4.5028e-06	5.36361e-05	Rpl23a
ENSMUSG00000058546	11842.9	0.330506	0.0720574	4.58671	4.5028e-06	5.36361e-05	Gm46442
ENSMUSG00000043733	3304.04	0.371741	0.0810558	4.58623	4.51317e-06	5.37163e-05	Ptpn11
ENSMUSG00000030616	30.9281	1.82634	0.398366	4.58459	4.54888e-06	5.40974e-05	Sytl2
ENSMUSG00000024219	541.218	-0.505276	0.110222	-4.58418	4.55779e-06	5.41597e-05	Anks1
ENSMUSG00000009585	1220.9	-0.395479	0.0862889	-4.58319	4.57939e-06	5.4366e-05	Apobec3
ENSMUSG00000026694	674.154	-0.497052	0.108455	-4.58304	4.58254e-06	5.4366e-05	Mettl13
ENSMUSG00000028034	3915.69	-0.296338	0.0646987	-4.58027	4.6437e-06	5.50471e-05	Fubp1
ENSMUSG00000100865	85.9166	1.35093	0.294998	4.57946	4.66184e-06	5.52176e-05	Gm9320
ENSMUSG00000024143	310.173	-0.602671	0.131638	-4.57824	4.68901e-06	5.54948e-05	Rhoq
ENSMUSG00000083424	115.433	1.1957	0.261304	4.5759	4.74182e-06	5.60747e-05	NA
ENSMUSG00000023169	3328.6	0.363701	0.079503	4.57469	4.76924e-06	5.63454e-05	Slc38a1
ENSMUSG00000034269	1757.5	-0.377976	0.0826269	-4.57449	4.77389e-06	5.63454e-05	Setd5
ENSMUSG00000046785	237.158	-0.764972	0.16723	-4.57439	4.77621e-06	5.63454e-05	Epm2aip1
ENSMUSG00000047141	411.138	-0.541004	0.118406	-4.56908	4.89879e-06	5.77453e-05	Zfp654
ENSMUSG00000030207	226.739	0.717846	0.157137	4.5683	4.91705e-06	5.79141e-05	Fam234b
ENSMUSG00000021709	1975.73	0.373174	0.0817009	4.56756	4.93423e-06	5.807e-05	Erbin
ENSMUSG00000021886	131.351	0.910001	0.199571	4.55979	5.1205e-06	6.02139e-05	Gpr65
ENSMUSG00000029577	814.285	0.441316	0.0967883	4.5596	5.12501e-06	6.02188e-05	Ube3b
ENSMUSG00000030956	820.725	0.445672	0.0978262	4.55575	5.21982e-06	6.1284e-05	Fam53b
ENSMUSG00000034377	596.648	0.46909	0.102986	4.55489	5.24139e-06	6.14834e-05	Tulp4
ENSMUSG00000025579	319.665	0.619293	0.135967	4.55474	5.24517e-06	6.14834e-05	Gaa
ENSMUSG00000031642	1078.07	0.409025	0.0898114	4.55426	5.25692e-06	6.15721e-05	Sh3rf1
ENSMUSG00000005718	306.622	-0.600349	0.131874	-4.55246	5.30231e-06	6.20543e-05	Tfap4
ENSMUSG00000028729	1620.94	-0.348193	0.0765459	-4.54882	5.39481e-06	6.30867e-05	Ebna1bp2
ENSMUSG00000070691	532.418	-0.675931	0.148622	-4.54799	5.416e-06	6.32842e-05	Runx3
ENSMUSG00000032624	2024.81	-0.389456	0.0856419	-4.54749	5.42898e-06	6.33855e-05	Eml4
ENSMUSG00000037876	576.081	-0.488503	0.107493	-4.54449	5.50693e-06	6.42446e-05	Jmjd1c
ENSMUSG00000064109	94.5945	1.03419	0.227584	4.54422	5.51395e-06	6.42755e-05	Hcst
ENSMUSG00000021596	23.2689	2.17383	0.478859	4.53961	5.63586e-06	6.56446e-05	Mctp1
ENSMUSG00002076169	1571.22	0.427485	0.0941797	4.53903	5.65123e-06	6.57715e-05	NA
ENSMUSG00000063275	36.4857	-1.7295	0.38108	-4.53841	5.66787e-06	6.59131e-05	Hacd1
ENSMUSG00000020525	470.435	0.504604	0.111386	4.53021	5.89255e-06	6.84718e-05	Ppm1d
ENSMUSG00000090516	99.105	1.37505	0.303543	4.52999	5.89874e-06	6.84896e-05	Rps11-ps1
ENSMUSG00000022105	612.991	0.486187	0.10738	4.52773	5.96215e-06	6.91713e-05	Rb1
ENSMUSG00000021061	51.9716	1.47245	0.325423	4.52473	6.04717e-06	7.01023e-05	Sptb
ENSMUSG00000042978	176.944	0.784999	0.173509	4.52425	6.06108e-06	7.02083e-05	Sbk1
ENSMUSG00000021693	978.802	-0.403852	0.0894624	-4.51421	6.35529e-06	7.35583e-05	Kif2a
ENSMUSG00000044786	665.033	0.523394	0.115971	4.51316	6.38674e-06	7.38643e-05	Zfp36
ENSMUSG00000041997	1130.98	0.450595	0.0998752	4.51158	6.43463e-06	7.43597e-05	Tlk1
ENSMUSG00000066724	122.565	1.20032	0.266128	4.51029	6.47384e-06	7.47541e-05	Gm10175
ENSMUSG00000016194	74.1344	1.36914	0.303794	4.50681	6.5811e-06	7.5933e-05	Hsd11b1
ENSMUSG00000031447	1574.06	0.383639	0.0851655	4.50463	6.64878e-06	7.66537e-05	Lamp1
ENSMUSG00000083563	312.001	0.65093	0.144571	4.5025	6.71589e-06	7.73669e-05	NA
ENSMUSG00000018459	21.5436	-2.33488	0.518872	-4.49991	6.79813e-06	7.82083e-05	Slc13a3
ENSMUSG00000021417	269.995	0.684591	0.152136	4.49987	6.79956e-06	7.82083e-05	Eci2
ENSMUSG00000027313	55.074	3.57988	0.795999	4.49735	6.88068e-06	7.90794e-05	Chac1
ENSMUSG00000120697	39.1998	-1.64568	0.366127	-4.49484	6.96225e-06	7.99545e-05	NA
ENSMUSG00000052712	433.891	0.55122	0.122641	4.49457	6.97108e-06	7.99935e-05	BC004004
ENSMUSG00000053263	131.036	-0.850277	0.189353	-4.49043	7.10779e-06	8.14986e-05	Gm12592
ENSMUSG00000068744	136.985	0.865458	0.192901	4.48654	7.239e-06	8.29384e-05	Psrc1
ENSMUSG00000029910	2708.14	0.324122	0.0722488	4.48619	7.25087e-06	8.30097e-05	Mad2l1
ENSMUSG00000020736	785.601	-0.434632	0.0969635	-4.48242	7.37996e-06	8.4422e-05	Nt5c
ENSMUSG00000021131	3060.42	-0.346123	0.0772599	-4.47999	7.46477e-06	8.52597e-05	Erh
ENSMUSG00000059456	1769.27	0.359234	0.0801865	4.47999	7.46479e-06	8.52597e-05	Ptk2b
ENSMUSG00000020315	2528.97	0.337224	0.0753215	4.47712	7.56554e-06	8.63434e-05	Sptbn1
ENSMUSG00000009535	652.61	-0.448721	0.10033	-4.47245	7.73277e-06	8.81835e-05	Rnmt
ENSMUSG00000020074	1364.76	-0.355648	0.0795352	-4.47159	7.76418e-06	8.84732e-05	Ccar1
ENSMUSG00000020097	521.003	0.50338	0.112728	4.46543	7.99068e-06	9.09836e-05	Sgpl1
ENSMUSG00000046722	1563.29	-0.406302	0.0910369	-4.46304	8.08044e-06	9.19346e-05	Cdc42se1
ENSMUSG00000058761	315.474	0.657244	0.147305	4.46179	8.12768e-06	9.24005e-05	Rnf169
ENSMUSG00000027936	522.599	-0.468165	0.104938	-4.46133	8.14514e-06	9.25276e-05	Crtc2
ENSMUSG00000043510	147.542	0.793124	0.177925	4.45763	8.28691e-06	9.40654e-05	Hscb
ENSMUSG00000111203	1211.36	0.360248	0.0808329	4.4567	8.32303e-06	9.44025e-05	NA
ENSMUSG00000026126	328.195	0.602432	0.135246	4.45434	8.41521e-06	9.53745e-05	Ptpn18
ENSMUSG00000039936	3814.95	-0.449911	0.101082	-4.45095	8.54904e-06	9.68167e-05	Pik3cd
ENSMUSG00000024669	6731.32	0.352846	0.0793849	4.44475	8.79932e-06	9.95501e-05	Cd5
ENSMUSG00000064127	2132.21	0.465604	0.104756	4.44464	8.80394e-06	9.95501e-05	Med14
ENSMUSG00000008373	1333.09	-0.390156	0.0878024	-4.44358	8.84759e-06	9.99644e-05	Prpf31
ENSMUSG00000083337	141.467	1.07065	0.240952	4.44342	8.85416e-06	9.99644e-05	Gm11539
ENSMUSG00000052276	18.0056	2.58917	0.582925	4.44168	8.92598e-06	0.000100698	Ostn
ENSMUSG00000031446	637.843	-0.436737	0.0983431	-4.44095	8.95622e-06	0.000100962	Cul4a
ENSMUSG00002075486	86.6051	1.21082	0.272708	4.44	8.99584e-06	0.000101331	NA
ENSMUSG00000040680	10.5624	-5.8284	1.31313	-4.43857	9.05597e-06	0.00010193	Kremen2
ENSMUSG00000035000	196.907	0.703407	0.158516	4.43747	9.10236e-06	0.000102374	Dpp4
ENSMUSG00000028161	324.593	0.642981	0.144935	4.43635	9.14963e-06	0.000102827	Ppp3ca
ENSMUSG00000111229	19.792	-2.44417	0.551102	-4.43506	9.20454e-06	0.000103365	NA
ENSMUSG00000035239	203.464	-0.75609	0.17063	-4.43117	9.37217e-06	0.000105167	Neu3
ENSMUSG00000026277	379.365	-0.535863	0.120943	-4.4307	9.39273e-06	0.000105317	Stk25
ENSMUSG00000055313	23.2029	-2.15459	0.486373	-4.42991	9.42709e-06	0.000105622	Pgbd1
ENSMUSG00000080746	108.87	0.951793	0.214942	4.42815	9.50457e-06	0.000106409	Rpsa-ps12
ENSMUSG00000031015	194.864	0.82053	0.185339	4.42718	9.54747e-06	0.000106808	Swap70
ENSMUSG00000051154	385.45	0.526882	0.119046	4.42588	9.60502e-06	0.00010737	Commd3
ENSMUSG00000022992	627.917	-0.444273	0.100445	-4.42306	9.73148e-06	0.000108701	Kansl2
ENSMUSG00000035877	211.477	0.697	0.157615	4.42217	9.77157e-06	0.000109066	Zhx3
ENSMUSG00000037070	1818.27	-0.324686	0.0734305	-4.42167	9.79411e-06	0.000109235	Rbmxl1
ENSMUSG00000025362	9762.6	0.328069	0.0742247	4.41994	9.87268e-06	0.000109998	Rps26
ENSMUSG00000055720	587.351	-0.461932	0.104517	-4.41969	9.88423e-06	0.000109998	Ubl7
ENSMUSG00000028495	14725.8	0.289427	0.065486	4.41968	9.88491e-06	0.000109998	Rps6
ENSMUSG00000036402	615.922	-1.17331	0.265527	-4.41882	9.9241e-06	0.000110206	Gng12
ENSMUSG00000020430	1974.09	-0.332882	0.0753331	-4.41881	9.92476e-06	0.000110206	Pes1
ENSMUSG00000062683	1723.53	0.370174	0.083773	4.41878	9.92609e-06	0.000110206	Atp5g2
ENSMUSG00000073409	153.69	-0.77479	0.17542	-4.41676	1.00189e-05	0.000111153	H2-Q6
ENSMUSG00000040472	208.272	-0.676945	0.153314	-4.4154	1.00823e-05	0.000111771	Rabggta
ENSMUSG00000032333	152.626	-0.795219	0.180121	-4.41492	1.01049e-05	0.000111937	Stoml1
ENSMUSG00000006221	13.3441	-3.34333	0.757667	-4.41267	1.02105e-05	0.000113022	Hspb7
ENSMUSG00000027447	689.67	0.431645	0.0978321	4.4121	1.02373e-05	0.000113234	Cst3
ENSMUSG00000003575	242.217	0.635724	0.144114	4.41125	1.02777e-05	0.000113595	Crtc1
ENSMUSG00000030638	32.5183	-1.77926	0.403403	-4.41062	1.03075e-05	0.000113839	Sh3gl3
ENSMUSG00000094410	234.857	-0.820351	0.186193	-4.40591	1.05342e-05	0.000116255	Zbed6
ENSMUSG00000020614	26.3871	-1.93825	0.440009	-4.40502	1.05776e-05	0.000116647	Fam20a
ENSMUSG00000047921	421.059	0.506911	0.115094	4.40434	1.06107e-05	0.000116925	Trappc9
ENSMUSG00000038212	1160.56	0.363534	0.0826017	4.40105	1.0773e-05	0.000118624	Mfsd14b
ENSMUSG00000046808	95.6757	-1.03986	0.236398	-4.39878	1.0886e-05	0.000119779	Atp10d
ENSMUSG00000096474	151.518	0.975204	0.221734	4.39809	1.0921e-05	0.000120074	NA
ENSMUSG00000018846	1421.48	-0.36665	0.0834345	-4.39447	1.11044e-05	0.000121999	Pank3
ENSMUSG00000049313	283.187	0.808806	0.184065	4.39413	1.11215e-05	0.000122096	Sorl1
ENSMUSG00000027288	2996.21	-0.332817	0.0757519	-4.39351	1.11535e-05	0.000122355	Zfp106
ENSMUSG00000024427	38.0053	1.65736	0.377278	4.39295	1.11824e-05	0.000122581	Spry4
ENSMUSG00000031934	864.066	0.406083	0.0924519	4.39237	1.12121e-05	0.000122816	Panx1
ENSMUSG00000020321	1862.03	0.316553	0.0720851	4.39138	1.12634e-05	0.000123285	Mdh1
ENSMUSG00000038152	79.249	1.06044	0.241499	4.3911	1.12781e-05	0.000123354	5033430I15Rik
ENSMUSG00000028337	604.199	-0.622703	0.141832	-4.39042	1.13131e-05	0.000123645	Coro2a
ENSMUSG00000001288	162.481	0.945071	0.215286	4.38984	1.13436e-05	0.000123886	Rarg
ENSMUSG00000004151	36.8273	-1.88158	0.42901	-4.38587	1.15523e-05	0.000126073	Etv1
ENSMUSG00000074516	191.457	0.930983	0.212332	4.38457	1.16214e-05	0.000126732	NA
ENSMUSG00000038538	533.866	-0.543775	0.124036	-4.384	1.16519e-05	0.000126932	Ubn2
ENSMUSG00000016498	437.684	0.500034	0.114061	4.38391	1.1657e-05	0.000126932	Pdcd1lg2
ENSMUSG00000026816	613.327	-0.461011	0.105172	-4.38339	1.16846e-05	0.000127139	Gtf3c5
ENSMUSG00000031155	2184.64	-0.42315	0.096578	-4.38143	1.17902e-05	0.000128194	Pim2
ENSMUSG00000071054	2146.69	-0.329068	0.0751131	-4.38097	1.18152e-05	0.00012837	Safb
ENSMUSG00000030061	944.132	-0.391763	0.0894728	-4.37857	1.19461e-05	0.000129697	Uba3
ENSMUSG00000021840	3045.41	-0.295924	0.0676042	-4.37729	1.20162e-05	0.000130362	Mapk1ip1l
ENSMUSG00000092550	2563.01	-0.453616	0.103665	-4.37581	1.20984e-05	0.000131157	NA
ENSMUSG00000071711	255.528	0.645061	0.147426	4.37549	1.2116e-05	0.000131251	Mpst
ENSMUSG00000090862	7341.2	0.302554	0.0691785	4.37352	1.22258e-05	0.000132309	Rps13
ENSMUSG00000031700	161.668	2.10304	0.480868	4.37342	1.22317e-05	0.000132309	Gpt2
ENSMUSG00000039886	207.356	0.693306	0.1586	4.37142	1.23439e-05	0.000133425	Tmem120a
ENSMUSG00000064354	153.103	0.977267	0.22385	4.36573	1.26701e-05	0.000136851	COX2
ENSMUSG00000030084	405.903	0.642778	0.147249	4.36525	1.26976e-05	0.000137046	Plxna1
ENSMUSG00000005470	903.414	0.399952	0.0916492	4.36395	1.27737e-05	0.000137767	Asf1b
ENSMUSG00000062248	953.442	-0.414234	0.0949394	-4.36314	1.28209e-05	0.000138175	Cks2
ENSMUSG00000020366	534.85	0.463975	0.106357	4.36245	1.28613e-05	0.000138509	Mapk9
ENSMUSG00000044147	4301.37	0.276374	0.063369	4.36134	1.29271e-05	0.000139115	Arf6
ENSMUSG00000028383	307.678	0.56922	0.13052	4.36116	1.29372e-05	0.000139122	Hsdl2
ENSMUSG00000030830	6621.2	0.306108	0.070243	4.35785	1.31348e-05	0.000141144	Itgal
ENSMUSG00000084817	126.106	1.00601	0.231018	4.35469	1.33256e-05	0.000143	NA
ENSMUSG00000033900	142.018	-0.845097	0.194067	-4.35467	1.3327e-05	0.000143	Map9
ENSMUSG00000021928	112.914	1.03506	0.237858	4.3516	1.35145e-05	0.000144907	Ebpl
ENSMUSG00000104623	90.1494	1.19401	0.274411	4.35118	1.3541e-05	0.000145085	Gm6394
ENSMUSG00000053819	721.136	0.457114	0.105132	4.34801	1.37376e-05	0.000147084	Camk2d
ENSMUSG00000035293	637.174	-0.444955	0.10237	-4.34654	1.38302e-05	0.000147969	G2e3
ENSMUSG00000003154	230.733	0.648762	0.149292	4.3456	1.38896e-05	0.000148495	Foxj2
ENSMUSG00000032327	14.3535	-3.07345	0.707405	-4.34469	1.39473e-05	0.000149004	Stra6
ENSMUSG00000041515	8792.26	-0.844204	0.194367	-4.34336	1.4032e-05	0.0001498	Irf8
ENSMUSG00000005846	2687.52	-0.319551	0.0736159	-4.34079	1.4197e-05	0.000151452	Rsl1d1
ENSMUSG00000068114	153.821	-0.820516	0.189054	-4.34012	1.42407e-05	0.000151808	Ccdc134
ENSMUSG00000043008	642.064	-0.430214	0.0991676	-4.33826	1.43616e-05	0.000152986	Klhl6
ENSMUSG00000041046	28.6374	1.81814	0.419435	4.33474	1.45935e-05	0.000155344	Ramp3
ENSMUSG00000024048	800.756	0.438092	0.101093	4.33355	1.46724e-05	0.00015607	Myl12a
ENSMUSG00000074151	841.984	-0.414323	0.0956334	-4.33241	1.47489e-05	0.000156771	Nlrc5
ENSMUSG00000025794	12313.3	0.282693	0.0652804	4.33044	1.48812e-05	0.000158063	Rpl14
ENSMUSG00000021094	206.441	0.684398	0.158072	4.32965	1.49344e-05	0.000158514	Dhrs7
ENSMUSG00000061731	538.137	0.654544	0.151198	4.32904	1.49757e-05	0.000158838	Ext1
ENSMUSG00000116840	231.134	0.66016	0.152506	4.32876	1.49952e-05	0.00015893	NA
ENSMUSG00000060636	6025.72	0.316939	0.0732379	4.32753	1.50792e-05	0.000159705	Rpl35a
ENSMUSG00000041187	787.296	0.418029	0.0966206	4.3265	1.51494e-05	0.000160333	Prkd2
ENSMUSG00000050957	55.7064	1.32015	0.30518	4.32582	1.51967e-05	0.000160718	Insl6
ENSMUSG00000048307	949.521	-0.395972	0.0916419	-4.32087	1.55417e-05	0.000164249	Ankrd46
ENSMUSG00000029994	134.615	-0.813124	0.188312	-4.31795	1.57483e-05	0.000166313	Anxa4
ENSMUSG00000037563	12303.6	0.327851	0.0759811	4.31489	1.5968e-05	0.000168512	Rps16
ENSMUSG00000032602	259.401	0.605034	0.140271	4.31332	1.60821e-05	0.000169594	Slc25a20
ENSMUSG00000110291	12.6389	3.14908	0.730166	4.31283	1.61176e-05	0.000169847	NA
ENSMUSG00000032407	1636.53	-0.339807	0.0788071	-4.31188	1.61869e-05	0.000170455	U2surp
ENSMUSG00000042460	710.1	0.435851	0.10113	4.30979	1.63409e-05	0.000171952	C1galt1
ENSMUSG00000014349	1747.21	-0.338392	0.07852	-4.30963	1.63525e-05	0.000171952	Ube2z
ENSMUSG00000018654	5443.51	0.341112	0.0791897	4.30753	1.65087e-05	0.000173471	Ikzf1
ENSMUSG00000120024	874.8	-1.07654	0.249971	-4.30664	1.65753e-05	0.000174047	NA
ENSMUSG00000027506	602.795	-0.456848	0.106108	-4.30549	1.66618e-05	0.00017483	Tpd52
ENSMUSG00000035933	899.516	0.427132	0.0992139	4.30517	1.66859e-05	0.000174958	Cog5
ENSMUSG00000111546	26.2834	1.86801	0.434277	4.30143	1.69702e-05	0.000177812	NA
ENSMUSG00000050708	4532.64	0.309359	0.071929	4.3009	1.70107e-05	0.00017811	Ftl1
ENSMUSG00000069272	42.1986	1.44424	0.335905	4.29956	1.71139e-05	0.000179063	H2ac8
ENSMUSG00000022201	1260.19	-0.35408	0.0823678	-4.29876	1.71756e-05	0.000179522	Zfr
ENSMUSG00000031818	4528.55	0.321749	0.0748485	4.29867	1.71822e-05	0.000179522	Cox4i1
ENSMUSG00000006057	1915.97	0.3937	0.0916	4.29804	1.72317e-05	0.000179912	Atp5g1
ENSMUSG00000066543	110.273	1.2327	0.28685	4.29737	1.72836e-05	0.000180325	Rpl17-ps9
ENSMUSG00000102070	191.593	0.739518	0.172142	4.29597	1.73934e-05	0.000181342	NA
ENSMUSG00000032041	21.034	-2.21287	0.515124	-4.2958	1.74067e-05	0.000181353	Tirap
ENSMUSG00000019066	71.9642	1.13748	0.265099	4.29078	1.78046e-05	0.000185367	Rab3d
ENSMUSG00000002844	1370.94	-0.374036	0.0872014	-4.28934	1.79207e-05	0.000186444	Adprh
ENSMUSG00000110256	382.933	-0.506535	0.118118	-4.28837	1.7999e-05	0.000187126	NA
ENSMUSG00000020111	311.83	0.575889	0.13449	4.28201	1.85213e-05	0.00019242	Micu1
ENSMUSG00000000838	1067.27	-0.366074	0.0855451	-4.27931	1.87472e-05	0.00019463	Fmr1
ENSMUSG00000028420	429.113	0.745176	0.174166	4.27855	1.88116e-05	0.000195161	Tmem38b
ENSMUSG00000029056	183.926	-0.693328	0.162075	-4.27784	1.88719e-05	0.000195648	Pank4
ENSMUSG00000030775	97.541	0.963952	0.225355	4.27749	1.89011e-05	0.000195812	Trat1
ENSMUSG00000112762	11.4811	-3.99414	0.934144	-4.27572	1.9052e-05	0.000197237	4930459C07Rik
ENSMUSG00000003868	1928.3	-0.35597	0.0832608	-4.27535	1.90835e-05	0.000197424	Ruvbl2
ENSMUSG00000091956	16.5606	2.54506	0.595833	4.27143	1.94228e-05	0.000200793	C2cd4b
ENSMUSG00000034274	625.661	0.425925	0.0997565	4.26965	1.95782e-05	0.000202258	Thoc5
ENSMUSG00000101431	63.3045	1.24046	0.290661	4.26773	1.97474e-05	0.000203863	Gm7901
ENSMUSG00000032446	46.2658	-1.47557	0.345988	-4.26481	2.00074e-05	0.000206401	Eomes
ENSMUSG00000002578	82.5712	-0.997321	0.234182	-4.25875	2.05577e-05	0.00021193	Ikzf4
ENSMUSG00000033352	633.632	-0.426024	0.100041	-4.25848	2.05824e-05	0.000212037	Map2k4
ENSMUSG00000028180	1529.38	-0.324558	0.0762291	-4.25766	2.06573e-05	0.000212659	Zranb2
ENSMUSG00000038695	310.793	0.576809	0.135491	4.25716	2.0704e-05	0.00021299	Josd2
ENSMUSG00000063077	631.021	0.526046	0.123612	4.25563	2.08462e-05	0.000214304	Kif1b
ENSMUSG00000025314	217.45	-0.819066	0.192496	-4.25498	2.09064e-05	0.000214773	Ptprj
ENSMUSG00000024927	1797.89	0.365463	0.0859045	4.25429	2.09714e-05	0.00021529	Rela
ENSMUSG00000034163	431.85	-0.553654	0.130258	-4.25043	2.13356e-05	0.000218876	Zfc3h1
ENSMUSG00000031628	2913.88	-0.38363	0.0902641	-4.25008	2.1369e-05	0.000219066	Casp3
ENSMUSG00000070003	1023.73	-0.377332	0.0888001	-4.24922	2.14512e-05	0.000219755	Ssbp4
ENSMUSG00000016520	730.152	0.456206	0.107369	4.24895	2.14775e-05	0.000219872	Lnx2
ENSMUSG00000117393	287.406	-0.572952	0.134861	-4.24846	2.15245e-05	0.000220199	NA
ENSMUSG00000038495	1114.3	-0.410715	0.0967485	-4.24518	2.18418e-05	0.000223291	Otud7b
ENSMUSG00000037013	1240.42	-0.351061	0.0827471	-4.24258	2.20967e-05	0.000225739	Ss18
ENSMUSG00000121036	535.537	-0.477066	0.112509	-4.24023	2.23293e-05	0.000227958	NA
ENSMUSG00000010911	132.163	0.832558	0.196391	4.23929	2.24226e-05	0.000228751	Apip
ENSMUSG00000046079	305.961	0.569189	0.134306	4.238	2.25524e-05	0.000229915	Lrrc8d
ENSMUSG00000028010	2207.92	-0.310413	0.0732611	-4.23707	2.26452e-05	0.000230701	Gar1
ENSMUSG00000040502	157.283	-0.870837	0.205568	-4.23625	2.2728e-05	0.000231385	Marchf9
ENSMUSG00000037960	105.278	0.955914	0.225737	4.23464	2.28918e-05	0.000232891	Card19
ENSMUSG00000015437	843.456	-1.64836	0.389322	-4.23392	2.29651e-05	0.000233476	Gzmb
ENSMUSG00000026456	282.093	0.604791	0.142868	4.2332	2.30392e-05	0.000234067	Cyb5r1
ENSMUSG00000008682	16516.3	0.295008	0.0696983	4.23265	2.30958e-05	0.00023448	Rpl10
ENSMUSG00000044424	235.794	0.866266	0.204686	4.23217	2.31451e-05	0.000234819	Gm9493
ENSMUSG00000031996	1187.86	0.403104	0.0952576	4.23173	2.31905e-05	0.000235117	Aplp2
ENSMUSG00000038563	554.574	-0.448448	0.106019	-4.22989	2.33807e-05	0.000236882	Efl1
ENSMUSG00000043004	419.508	-0.593412	0.140313	-4.2292	2.34521e-05	0.000237429	Gng2
ENSMUSG00000056952	761.826	-0.417215	0.0986543	-4.22906	2.34669e-05	0.000237429	Tatdn2
ENSMUSG00000025209	844.364	-0.383035	0.0905984	-4.22783	2.35955e-05	0.000238566	Twnk
ENSMUSG00000020961	28.1054	-1.95577	0.462649	-4.22733	2.36476e-05	0.000238928	Ston2
ENSMUSG00000035860	10.9507	-3.90912	0.925065	-4.22578	2.38114e-05	0.000240418	Cdhr3
ENSMUSG00000120133	2653.02	0.313052	0.0740906	4.22526	2.38663e-05	0.000240807	NA
ENSMUSG00000071657	187.999	0.682821	0.161629	4.22463	2.39338e-05	0.000241323	Bscl2
ENSMUSG00000027366	896.514	0.417826	0.0989359	4.2232	2.40859e-05	0.00024269	Sppl2a
ENSMUSG00000034681	2796.44	-0.282075	0.066801	-4.22262	2.41476e-05	0.000243146	Rnps1
ENSMUSG00000017466	196.836	0.724019	0.17149	4.22193	2.42218e-05	0.000243629	Timp2
ENSMUSG00000097279	56.7495	1.27756	0.302605	4.22187	2.42287e-05	0.000243629	Gm5106
ENSMUSG00000113679	164.922	0.743658	0.176162	4.22144	2.42748e-05	0.000243925	Gm10432
ENSMUSG00000011179	10020	0.29141	0.0690438	4.22066	2.43589e-05	0.000244604	Odc1
ENSMUSG00000022474	433.571	0.483378	0.114554	4.21965	2.44687e-05	0.000245538	Pmm1
ENSMUSG00000039202	986.118	0.370995	0.0879575	4.21789	2.46602e-05	0.000247291	Abhd2
ENSMUSG00000060032	1725.03	0.380157	0.090152	4.21684	2.47745e-05	0.000248269	H2aj
ENSMUSG00000064105	46.2993	1.4036	0.33299	4.21516	2.49606e-05	0.000249827	Cnnm2
ENSMUSG00000029993	516.015	0.472431	0.11208	4.21512	2.4964e-05	0.000249827	Nfu1
ENSMUSG00000027630	565.125	0.434841	0.103169	4.21486	2.49928e-05	0.000249945	Tbl1xr1
ENSMUSG00000096617	44.2281	-1.6458	0.390669	-4.21276	2.52269e-05	0.000252032	NA
ENSMUSG00000066150	629.053	-0.424956	0.100875	-4.21268	2.52358e-05	0.000252032	Slc31a1
ENSMUSG00000074305	677.072	-0.497386	0.118092	-4.21185	2.53282e-05	0.000252784	Peak1
ENSMUSG00000039021	250.824	0.643282	0.152823	4.20933	2.56134e-05	0.000255457	Ttc16
ENSMUSG00000028465	4750.38	0.355657	0.0845026	4.20882	2.56704e-05	0.000255852	Tln1
ENSMUSG00000046999	917.865	0.475328	0.112942	4.2086	2.56952e-05	0.000255926	1110032F04Rik
ENSMUSG00000037787	331.949	0.541031	0.128587	4.20752	2.58192e-05	0.000256986	Coa8
ENSMUSG00000031176	210.34	0.692221	0.164551	4.20672	2.59109e-05	0.000257725	Dynlt3
ENSMUSG00000040918	295.156	0.6298	0.149721	4.20649	2.59366e-05	0.000257807	Slc19a2
ENSMUSG00000022253	494.531	-0.4802	0.114395	-4.19772	2.6962e-05	0.000267817	Nadk2
ENSMUSG00000031059	1066.28	0.429898	0.102451	4.19612	2.71521e-05	0.000269524	Ndufb11
ENSMUSG00000036986	2257.67	-0.33492	0.0798248	-4.1957	2.72035e-05	0.000269782	Pml
ENSMUSG00000041236	504.369	0.465313	0.110905	4.1956	2.72148e-05	0.000269782	Vps41
ENSMUSG00000041957	23.499	-2.04715	0.488041	-4.19463	2.7332e-05	0.000270762	Pkp2
ENSMUSG00000021973	719.575	0.407117	0.0971972	4.18856	2.80729e-05	0.000277914	Micu2
ENSMUSG00000036501	377.947	0.67118	0.160409	4.18419	2.86188e-05	0.000283128	Fam13b
ENSMUSG00000045983	10689.7	-0.285556	0.068263	-4.18318	2.87462e-05	0.000284197	Eif4g1
ENSMUSG00000031165	809.427	0.381096	0.0912608	4.1759	2.9681e-05	0.000293242	Was
ENSMUSG00000018341	432.504	-2.35327	0.564107	-4.17167	3.02381e-05	0.000298545	Il12rb2
ENSMUSG00000064339	18844.2	1.00542	0.241171	4.16889	3.06085e-05	0.000302	NA
ENSMUSG00000053477	113.853	-0.833259	0.200108	-4.16404	3.1267e-05	0.000308291	Tcf4
ENSMUSG00000028149	1670.7	-0.32039	0.076945	-4.16388	3.12882e-05	0.000308293	Rap1gds1
ENSMUSG00000046671	366.517	0.518448	0.124564	4.16208	3.15359e-05	0.000310525	Mtfr1l
ENSMUSG00000112099	59.8896	1.39139	0.334504	4.15957	3.18847e-05	0.000313681	NA
ENSMUSG00000026626	2209.79	0.331061	0.0795921	4.15947	3.18991e-05	0.000313681	Ppp2r5a
ENSMUSG00000085241	137.644	-0.778929	0.18747	-4.15494	3.25367e-05	0.000319738	Snhg3
ENSMUSG00000028587	316.057	-0.605043	0.145645	-4.15422	3.26399e-05	0.000320511	Orc1
ENSMUSG00000035545	336.855	-0.524167	0.126181	-4.15409	3.2659e-05	0.000320511	Leng8
ENSMUSG00000056851	6445.67	0.252312	0.0607629	4.1524	3.2901e-05	0.000322671	Pcbp2
ENSMUSG00000021282	3610.52	-0.312238	0.0752434	-4.14971	3.32902e-05	0.00032627	Eif5
ENSMUSG00000022799	577.726	0.52401	0.126294	4.14912	3.33751e-05	0.000326885	Arhgap31
ENSMUSG00000037896	829.27	-0.380322	0.0917366	-4.1458	3.38625e-05	0.000331438	Rcor1
ENSMUSG00000099568	561.16	-0.618588	0.149225	-4.14533	3.39325e-05	0.000331902	NA
ENSMUSG00000035561	60.5778	1.29296	0.311978	4.14439	3.40714e-05	0.000333039	Aldh1b1
ENSMUSG00000052125	70.4134	-1.14409	0.276232	-4.14176	3.44656e-05	0.000336669	F730043M19Rik
ENSMUSG00000034220	274.309	0.616054	0.148757	4.14134	3.45284e-05	0.000337058	Gpc1
ENSMUSG00000036432	520.704	-0.485343	0.117205	-4.14099	3.45815e-05	0.000337353	Siah2
ENSMUSG00000038213	982.983	-0.368322	0.088975	-4.13961	3.47891e-05	0.000339153	Tapbpl
ENSMUSG00000000876	202.531	-0.713076	0.172301	-4.13855	3.4951e-05	0.000340506	Pxmp4
ENSMUSG00000074800	48.2326	1.53981	0.372156	4.13755	3.51041e-05	0.000341771	NA
ENSMUSG00000042035	65.4669	-1.09357	0.264336	-4.13704	3.51818e-05	0.000342301	Igsf3
ENSMUSG00000033565	39.0398	-1.47156	0.35575	-4.13649	3.52652e-05	0.000342886	Rbfox2
ENSMUSG00000085585	17.4159	-2.43595	0.589066	-4.13528	3.54516e-05	0.000344396	NA
ENSMUSG00000047036	804.556	-0.41908	0.101345	-4.13518	3.54673e-05	0.000344396	Zfp445
ENSMUSG00000024188	1034.27	-0.36543	0.0884273	-4.13254	3.58774e-05	0.000348148	Luc7l
ENSMUSG00000110148	300.232	-0.648569	0.156999	-4.13103	3.61145e-05	0.000350218	NA
ENSMUSG00000020303	155.276	-2.28049	0.552456	-4.12792	3.66064e-05	0.000354754	Stc2
ENSMUSG00000110350	4217.01	0.279372	0.0676822	4.1277	3.66412e-05	0.000354857	NA
ENSMUSG00000059343	24.6076	-1.87996	0.455638	-4.12599	3.69139e-05	0.000357264	Aldoart1
ENSMUSG00000024079	183.858	-0.766875	0.185914	-4.1249	3.70892e-05	0.000358724	Eif2ak2
ENSMUSG00000040325	1382.06	-0.351556	0.0853036	-4.12123	3.76853e-05	0.00036425	Dcaf1
ENSMUSG00000025903	669.757	0.422456	0.102577	4.11843	3.81459e-05	0.000368459	Lypla1
ENSMUSG00000002769	67.7925	-1.28404	0.311928	-4.11648	3.847e-05	0.000371347	Gnmt
ENSMUSG00000002984	2193.97	-0.326849	0.0794381	-4.11451	3.87995e-05	0.000374282	Tomm40
ENSMUSG00000008822	94.6259	0.909183	0.221089	4.11229	3.91756e-05	0.000377662	Acyp1
ENSMUSG00000032661	85.1252	-0.969828	0.235873	-4.11166	3.92832e-05	0.000378451	Oas3
ENSMUSG00000026097	285.856	0.566039	0.137767	4.10866	3.97958e-05	0.000383139	Ormdl1
ENSMUSG00000035944	61.9065	1.1129	0.270982	4.10692	4.00964e-05	0.000385781	Ttc38
ENSMUSG00000020256	29.7974	1.85354	0.451733	4.10318	4.07515e-05	0.000391827	Aldh1l2
ENSMUSG00000021276	1241.9	-0.347208	0.0846662	-4.1009	4.11538e-05	0.000395437	Cinp
ENSMUSG00000033147	67.9932	1.0621	0.259003	4.10071	4.1189e-05	0.000395517	Slc22a15
ENSMUSG00000019528	596.482	0.466715	0.113827	4.10023	4.12745e-05	0.000396079	Gyg
ENSMUSG00000020131	42.3809	-1.36098	0.332069	-4.09849	4.15852e-05	0.000398762	Pcsk4
ENSMUSG00000097274	46.8735	1.34268	0.327613	4.09836	4.16083e-05	0.000398762	NA
ENSMUSG00000001403	2301.87	0.31701	0.0773537	4.09819	4.16391e-05	0.000398798	Ube2c
ENSMUSG00000046971	27.0101	1.77578	0.433548	4.09592	4.205e-05	0.000402471	Pla2g4f
ENSMUSG00000033909	1248.36	-0.366161	0.0894085	-4.09537	4.21497e-05	0.000403162	Usp36
ENSMUSG00000024525	517.681	-0.450769	0.110084	-4.09476	4.22597e-05	0.000403952	Impa2
ENSMUSG00000049303	16.285	-2.43731	0.595457	-4.09317	4.2551e-05	0.000406472	Syt12
ENSMUSG00000020803	558.986	-0.433491	0.105943	-4.09174	4.28148e-05	0.000408727	Txndc17
ENSMUSG00000033706	1349.65	-0.355413	0.0869115	-4.08937	4.32547e-05	0.000412659	Smyd5
ENSMUSG00000052369	239.404	0.631075	0.154357	4.08842	4.34317e-05	0.000414079	Tmem106c
ENSMUSG00000023883	1530.83	0.334577	0.081851	4.08763	4.35794e-05	0.000415218	Phf10
ENSMUSG00000060803	885.503	0.364374	0.0891447	4.08744	4.36155e-05	0.000415293	Gstp1
ENSMUSG00000000290	3696.11	0.33148	0.0811252	4.08603	4.38818e-05	0.000417309	Itgb2
ENSMUSG00000030983	1171.54	0.348282	0.0852375	4.08602	4.38839e-05	0.000417309	Bccip
ENSMUSG00000035614	392.86	-0.510222	0.124917	-4.0845	4.41722e-05	0.000419675	Togaram1
ENSMUSG00000041966	283.442	0.55479	0.135831	4.08441	4.41899e-05	0.000419675	Dcaf17
ENSMUSG00000059070	15749.7	0.29079	0.0712278	4.08254	4.4546e-05	0.000422784	Rpl18
ENSMUSG00000032265	244.101	-0.697767	0.17094	-4.08194	4.46607e-05	0.0004236	Tent5a
ENSMUSG00000020642	31.4632	1.72761	0.423354	4.08078	4.48851e-05	0.000425454	Rnf144a
ENSMUSG00000046876	484.759	0.499655	0.122544	4.07735	4.5551e-05	0.000431488	Atxn1
ENSMUSG00000026029	1030.36	-0.350797	0.0860522	-4.07656	4.5706e-05	0.000432678	Casp8
ENSMUSG00000028195	36.6464	1.75978	0.431731	4.0761	4.57971e-05	0.000433251	Ccn1
ENSMUSG00000034165	3243.41	-0.342641	0.0840641	-4.07596	4.58255e-05	0.000433251	Ccnd3
ENSMUSG00000039515	2751.84	0.282222	0.0692896	4.07308	4.63964e-05	0.000438367	Ptpa
ENSMUSG00000049658	1022.72	-0.493621	0.121203	-4.07269	4.64739e-05	0.000438817	Bdp1
ENSMUSG00000029426	459.428	0.47448	0.116626	4.06839	4.73398e-05	0.000446706	Scarb2
ENSMUSG00000067575	95.614	1.01236	0.248869	4.06785	4.74481e-05	0.000447442	NA
ENSMUSG00000033318	595.119	0.43447	0.106819	4.06735	4.75513e-05	0.000448127	Gstt2
ENSMUSG00000048007	334.982	-0.505244	0.124241	-4.06664	4.76963e-05	0.000449206	Timm8a1
ENSMUSG00000028248	331.283	-0.558086	0.137247	-4.06629	4.77672e-05	0.000449586	Pnisr
ENSMUSG00000032577	1022.97	-0.356503	0.0876763	-4.06613	4.78002e-05	0.000449609	Mapkapk3
ENSMUSG00000028041	234.513	0.629001	0.154716	4.06553	4.79225e-05	0.000450472	Adam15
ENSMUSG00000090946	381.991	-0.501438	0.123379	-4.06421	4.81947e-05	0.000452741	Ccdc71l
ENSMUSG00000070056	1328.56	-0.343475	0.0845714	-4.06135	4.87888e-05	0.000458029	Mfhas1
ENSMUSG00000042719	1482.05	-0.361069	0.0889108	-4.06102	4.88585e-05	0.000458391	Naa25
ENSMUSG00000029686	1076.54	-0.339284	0.0835717	-4.0598	4.91146e-05	0.000460501	Cul1
ENSMUSG00000026875	831.944	0.409196	0.100808	4.05917	4.92478e-05	0.000461455	Traf1
ENSMUSG00000026285	2042.23	0.399089	0.0983336	4.05852	4.9384e-05	0.000462437	Pdcd1
ENSMUSG00000040312	148.207	0.797606	0.196666	4.05564	4.99975e-05	0.000467883	Cchcr1
ENSMUSG00000032308	100.653	-0.928666	0.229109	-4.05338	5.04827e-05	0.000472124	Ulk3
ENSMUSG00000037112	220.101	0.624835	0.154161	4.05313	5.05368e-05	0.00047233	Sik2
ENSMUSG00000029472	5614.75	0.260571	0.0643517	4.04917	5.14006e-05	0.000480098	Anapc5
ENSMUSG00000048534	432.157	-0.563706	0.13923	-4.04874	5.14945e-05	0.00048067	Jaml
ENSMUSG00000052406	495.528	-0.434868	0.107415	-4.04847	5.15545e-05	0.000480925	Rexo4
ENSMUSG00000025499	769.7	-0.420526	0.103962	-4.04501	5.232e-05	0.000487637	Hras
ENSMUSG00000039067	2715.92	-0.293002	0.0724369	-4.04492	5.23404e-05	0.000487637	Psmd7
ENSMUSG00000026864	10056.1	-0.237473	0.058716	-4.04443	5.24501e-05	0.00048835	Hspa5
ENSMUSG00000038545	517.323	-0.432575	0.106991	-4.04311	5.27464e-05	0.000490798	Cul7
ENSMUSG00000071645	754.017	-0.382245	0.0945934	-4.04092	5.32417e-05	0.000495094	Tut1
ENSMUSG00000000740	21223.9	0.273126	0.0675986	4.04041	5.33569e-05	0.000495766	Rpl13
ENSMUSG00000093674	9994.04	0.318499	0.0788303	4.04031	5.33813e-05	0.000495766	Rpl41
ENSMUSG00000048758	9583.43	0.257398	0.0638208	4.03315	5.50351e-05	0.000510656	Rpl29
ENSMUSG00000034157	348.094	-0.508104	0.125985	-4.03306	5.50541e-05	0.000510656	Cipc
ENSMUSG00000060938	8479.19	0.322152	0.0799057	4.03165	5.53858e-05	0.00051341	Rpl26
ENSMUSG00000014503	151.442	0.762761	0.189202	4.03146	5.54311e-05	0.000513449	Pkd2l2
ENSMUSG00000041028	3475.33	0.286009	0.0709465	4.03134	5.54599e-05	0.000513449	Ghitm
ENSMUSG00000027835	796.409	-0.407792	0.101191	-4.02991	5.5799e-05	0.000516264	Pdcd10
ENSMUSG00000020821	745.11	0.442387	0.109844	4.02741	5.63937e-05	0.000521297	Kif1c
ENSMUSG00000035776	97.7307	0.895081	0.222252	4.02733	5.64139e-05	0.000521297	Cd99l2
ENSMUSG00000020777	432.446	-0.54805	0.136179	-4.02449	5.7099e-05	0.000527297	Acox1
ENSMUSG00000052798	1562.89	-0.302501	0.0751912	-4.02309	5.74393e-05	0.000530106	Nup107
ENSMUSG00000021143	524.523	0.488941	0.12154	4.0229	5.7486e-05	0.000530205	Pacs2
ENSMUSG00000024587	4589.1	0.39197	0.0974983	4.02028	5.81288e-05	0.000535797	Nars
ENSMUSG00000028455	972.865	-0.358649	0.0892257	-4.01957	5.83035e-05	0.000537072	Stoml2
ENSMUSG00000029614	21202.1	0.281204	0.0699655	4.01919	5.8399e-05	0.000537615	Rpl6
ENSMUSG00000025511	131.227	-0.82062	0.204303	-4.01668	5.90226e-05	0.000543015	Tspan4
ENSMUSG00000062461	114.649	1.07824	0.268545	4.01512	5.94153e-05	0.000546287	NA
ENSMUSG00000037266	1002.17	-0.383148	0.0954299	-4.01497	5.94532e-05	0.000546294	Rsrp1
ENSMUSG00000049470	809.672	-0.420726	0.104833	-4.01331	5.98727e-05	0.000549805	Aff4
ENSMUSG00000026831	9.24246	4.18925	1.04406	4.01246	6.00886e-05	0.000551443	Pierce1
ENSMUSG00000103622	28.1619	-1.75397	0.437242	-4.01144	6.03495e-05	0.000553492	B430319G15Rik
ENSMUSG00000116398	14.9794	-2.53461	0.632108	-4.00978	6.0776e-05	0.000557057	NA
ENSMUSG00000020812	42.658	-1.34503	0.335639	-4.00738	6.13967e-05	0.000562395	Snhg16
ENSMUSG00000100862	147.905	0.753537	0.188168	4.00459	6.21245e-05	0.000568407	Gm10925
ENSMUSG00000040681	3490.35	0.289082	0.0721879	4.00457	6.21303e-05	0.000568407	Hmgn1
ENSMUSG00000014313	1325.86	0.373865	0.0933692	4.00416	6.22374e-05	0.00056886	Cox6c
ENSMUSG00000020828	20.1017	-2.05471	0.513154	-4.00408	6.22591e-05	0.00056886	Pld2
ENSMUSG00000001472	2283.62	-0.276547	0.0690687	-4.00394	6.22958e-05	0.00056886	Tcf25
ENSMUSG00000031671	189.407	-0.699304	0.174686	-4.00321	6.24889e-05	0.000570269	Setd6
ENSMUSG00000002205	198.83	0.660083	0.164897	4.003	6.25454e-05	0.000570431	Vrk3
ENSMUSG00000092416	251.982	-0.562319	0.140539	-4.00117	6.30296e-05	0.000574491	Zfp141
ENSMUSG00000046364	12016.7	0.319145	0.0797701	4.00081	6.31258e-05	0.000575012	Rpl27a
ENSMUSG00000031508	508.606	-0.43351	0.108366	-4.00041	6.3233e-05	0.000575632	Ankrd10
ENSMUSG00000112980	105.498	0.884442	0.221189	3.99858	6.3725e-05	0.000579437	D430020J02Rik
ENSMUSG00000020250	2492.51	-0.341232	0.0853387	-3.99856	6.37298e-05	0.000579437	Txnrd1
ENSMUSG00000014837	32.8368	-1.52295	0.380958	-3.99768	6.39669e-05	0.000581234	Matcap1
ENSMUSG00000041453	10094	0.248739	0.0622486	3.9959	6.44489e-05	0.000585252	Rpl21
ENSMUSG00000032116	4075.97	0.290241	0.0726483	3.99515	6.46522e-05	0.000586735	Stt3a
ENSMUSG00000037692	260.472	0.633254	0.158519	3.9948	6.47476e-05	0.000587239	Ahdc1
ENSMUSG00000028530	3634.99	0.264396	0.0661947	3.99422	6.49069e-05	0.000588321	Jak1
ENSMUSG00000028599	869.519	0.370517	0.0927827	3.99339	6.51351e-05	0.000590026	Tnfrsf1b
ENSMUSG00000008348	757.378	-0.409398	0.102541	-3.99254	6.53692e-05	0.000591782	Ubc
ENSMUSG00000032724	972.003	-0.45202	0.113371	-3.98709	6.68891e-05	0.000605169	Abtb2
ENSMUSG00000026234	32864.2	-0.236629	0.0593712	-3.98559	6.7312e-05	0.000608621	Ncl
ENSMUSG00000026399	58.5605	1.21569	0.305048	3.98526	6.74076e-05	0.000608958	Cd55
ENSMUSG00000028545	21.9078	-1.99022	0.499407	-3.98517	6.7432e-05	0.000608958	Bend5
ENSMUSG00000020564	420.935	-0.486514	0.12209	-3.98489	6.75125e-05	0.000609311	Atxn7l1
ENSMUSG00000034266	270.837	-0.554046	0.139081	-3.98364	6.78684e-05	0.000611998	Batf
ENSMUSG00000045725	9.48065	-4.74678	1.1916	-3.98355	6.78935e-05	0.000611998	Prr15
ENSMUSG00000031703	543.327	0.413096	0.103769	3.98091	6.86514e-05	0.000618451	Itfg1
ENSMUSG00000031601	888.746	-0.357329	0.0897808	-3.98001	6.89112e-05	0.000620412	Cnot7
ENSMUSG00000026434	3849.98	0.252363	0.0634245	3.97896	6.92184e-05	0.000622796	Nucks1
ENSMUSG00000089774	688.248	-0.425536	0.107002	-3.97691	6.9817e-05	0.000627608	Slc5a3
ENSMUSG00000021792	82.4578	1.05672	0.265726	3.97674	6.98671e-05	0.000627608	Prxl2a
ENSMUSG00000025494	537.593	-0.417665	0.105028	-3.97669	6.98812e-05	0.000627608	Sigirr
ENSMUSG00000076437	1032.28	0.346081	0.0870755	3.97449	7.05302e-05	0.000633051	Selenoh
ENSMUSG00000083992	604.888	1.14439	0.287979	3.97385	7.0719e-05	0.000634358	Gm11478
ENSMUSG00000030400	399.389	-0.465015	0.117139	-3.96977	7.1941e-05	0.000644927	Ercc2
ENSMUSG00000047675	16833.5	0.290257	0.0731702	3.96687	7.28218e-05	0.000652102	Rps8
ENSMUSG00000047675	16833.5	0.290257	0.0731702	3.96687	7.28218e-05	0.000652102	Gm15501
ENSMUSG00000031605	380.818	-0.498013	0.125544	-3.96685	7.28302e-05	0.000652102	Klhl2
ENSMUSG00000040462	1155.08	0.390171	0.0983671	3.96648	7.29433e-05	0.000652718	Os9
ENSMUSG00000105814	47.3158	1.3063	0.329518	3.96428	7.36182e-05	0.000658357	Mir703
ENSMUSG00000014859	2242.55	-0.328461	0.0828768	-3.96324	7.39393e-05	0.000660827	E2f4
ENSMUSG00000018930	801.577	-0.55194	0.139277	-3.96291	7.40422e-05	0.000661345	Ccl4
ENSMUSG00000068747	88.3185	-0.915346	0.231013	-3.96232	7.42253e-05	0.000662577	Sort1
ENSMUSG00000030704	1194.74	-0.331365	0.0836382	-3.96189	7.43587e-05	0.000663366	Rab6a
ENSMUSG00000000627	51.4712	1.21561	0.307031	3.95924	7.51895e-05	0.000670372	Sema4f
ENSMUSG00000066629	53.0712	1.57916	0.399119	3.9566	7.60226e-05	0.000677389	NA
ENSMUSG00000026857	245.995	-0.579504	0.146478	-3.95626	7.61332e-05	0.000677963	Ntmt1
ENSMUSG00000025969	40.4391	-1.46004	0.369265	-3.95391	7.6883e-05	0.000684226	Nrp2
ENSMUSG00000022412	706.92	-0.374305	0.0947057	-3.9523	7.74033e-05	0.00068844	Mief1
ENSMUSG00000094808	43.4537	-1.48632	0.376089	-3.95205	7.74853e-05	0.000688753	1810009J06Rik
ENSMUSG00000054556	447.205	-0.478616	0.121205	-3.9488	7.85423e-05	0.000697727	Gm4876
ENSMUSG00000066026	39.4676	1.5037	0.380826	3.94853	7.86325e-05	0.000698107	Dhrs3
ENSMUSG00000024851	294.851	-0.534739	0.135457	-3.94765	7.89211e-05	0.000700246	Pitpnm1
ENSMUSG00000046245	30.887	1.53924	0.389968	3.94709	7.91065e-05	0.000701468	Pilra
ENSMUSG00000016252	1129.47	0.382581	0.0969427	3.94646	7.93144e-05	0.000702647	Atp5e
ENSMUSG00000013483	59.1045	1.09605	0.277735	3.9464	7.93349e-05	0.000702647	Card14
ENSMUSG00000062785	19.6438	-2.08274	0.527917	-3.9452	7.97335e-05	0.000705752	Kcnc3
ENSMUSG00000038146	15.6383	2.69585	0.683355	3.94501	7.97961e-05	0.000705881	Notch3
ENSMUSG00000087366	58.9663	-1.12832	0.286067	-3.94427	8.00434e-05	0.000707644	Junos
ENSMUSG00000041057	1963.65	-0.316663	0.0803147	-3.94278	8.05417e-05	0.000711621	Wdr43
ENSMUSG00000018567	1062.06	0.368239	0.0934302	3.94133	8.10302e-05	0.000715507	Gabarap
ENSMUSG00000025132	9934.93	-0.227252	0.0576622	-3.94109	8.11115e-05	0.000715796	Arhgdia
ENSMUSG00000029723	1465.53	-0.337031	0.0855285	-3.94057	8.1287e-05	0.000716915	Spacdr
ENSMUSG00000029723	1465.53	-0.337031	0.0855285	-3.94057	8.1287e-05	0.000716915	LOC122152370
ENSMUSG00000029723	1465.53	-0.337031	0.0855285	-3.94057	8.1287e-05	0.000716915	LOC122152371
ENSMUSG00000029414	1049.68	0.439892	0.111644	3.94011	8.14432e-05	0.000717862	Kntc1
ENSMUSG00000097779	7.41895	5.38628	1.36718	3.93969	8.15882e-05	0.000718709	4833407H14Rik
ENSMUSG00000045573	36.1165	1.56858	0.398182	3.93935	8.17034e-05	0.000719293	Penk
ENSMUSG00000014554	147.824	0.736237	0.187059	3.93586	8.28996e-05	0.000728966	Dguok
ENSMUSG00000050592	772.061	-0.364405	0.0925859	-3.93585	8.29012e-05	0.000728966	Fam78a
ENSMUSG00000086196	157.519	-0.768234	0.19521	-3.93541	8.30536e-05	0.000729869	NA
ENSMUSG00000027076	287.09	-0.56058	0.142455	-3.93514	8.31483e-05	0.000730182	Timm10
ENSMUSG00000004455	2981.19	-0.268348	0.0681948	-3.93502	8.31884e-05	0.000730182	Ppp1cc
ENSMUSG00000004455	2981.19	-0.268348	0.0681948	-3.93502	8.31884e-05	0.000730182	Ppp1ccb
ENSMUSG00000021215	750.933	-0.370104	0.0940648	-3.93456	8.33492e-05	0.000731157	Net1
ENSMUSG00000028792	2732.38	-0.30382	0.0772528	-3.9328	8.3961e-05	0.000736085	Ak2
ENSMUSG00000014748	1052.18	0.344202	0.0875774	3.93026	8.48532e-05	0.000743464	Tex261
ENSMUSG00000031349	361.651	-0.601413	0.153027	-3.9301	8.49091e-05	0.00074351	Nsdhl
ENSMUSG00000025404	640.064	0.38403	0.0977873	3.9272	8.59407e-05	0.000752096	R3hdm2
ENSMUSG00000037685	242.332	0.791448	0.201566	3.92649	8.61959e-05	0.000753881	Atp8a1
ENSMUSG00000041560	2801.78	0.337996	0.0861773	3.9221	8.77823e-05	0.0007673	Nop53
ENSMUSG00000028394	607.712	-0.430716	0.109833	-3.92157	8.79741e-05	0.00076852	Pole3
ENSMUSG00000023186	136.353	0.800169	0.204106	3.92036	8.84152e-05	0.000771915	Vwa5a
ENSMUSG00000021250	73.0508	0.983417	0.250915	3.91932	8.87979e-05	0.000774796	Fos
ENSMUSG00000058301	2184.49	-0.278222	0.0709923	-3.91905	8.88979e-05	0.000775209	Upf1
ENSMUSG00000016427	505.27	0.477029	0.121807	3.91627	8.99313e-05	0.000783756	Ndufa1
ENSMUSG00000018476	1601.96	0.420324	0.107342	3.91575	9.01226e-05	0.000784958	Kdm6b
ENSMUSG00000022754	17.217	-2.2009	0.562168	-3.91503	9.03923e-05	0.000786841	Tmem45a
ENSMUSG00000068606	81.8252	-1.05872	0.270639	-3.91194	9.15593e-05	0.000796528	Gm4841
ENSMUSG00000040495	93.0367	-0.921584	0.235599	-3.91166	9.16656e-05	0.000796982	Chrm4
ENSMUSG00000022488	2211.76	0.287972	0.073689	3.90794	9.30872e-05	0.000808863	Nckap1l
ENSMUSG00000037434	173.708	0.652187	0.16692	3.90718	9.3381e-05	0.000810937	Slc30a1
ENSMUSG00000028044	1243.64	-0.323982	0.0829233	-3.90701	9.34443e-05	0.000811008	Cks1b
ENSMUSG00000021298	291.869	-0.557767	0.142774	-3.90665	9.3585e-05	0.000811751	Gpr132
ENSMUSG00000034543	926.894	-0.406886	0.104168	-3.90606	9.38121e-05	0.000813064	Morc2a
ENSMUSG00000015165	7649.57	-0.256036	0.0655499	-3.90597	9.3847e-05	0.000813064	Hnrnpl
ENSMUSG00000068917	304.882	-0.512001	0.131091	-3.90569	9.39577e-05	0.000813545	Clk2
ENSMUSG00000023980	299.201	-0.515811	0.132218	-3.90123	9.5707e-05	0.000828203	Taf8
ENSMUSG00000020863	1440.24	-0.338221	0.0867584	-3.89843	9.68188e-05	0.000837331	Luc7l3
ENSMUSG00000011831	106.669	-0.895969	0.229918	-3.89691	9.74268e-05	0.000842001	Evi5
ENSMUSG00000020493	589.959	0.40484	0.10389	3.8968	9.74732e-05	0.000842001	Prr11
ENSMUSG00000092371	298.74	0.573932	0.147341	3.89527	9.80884e-05	0.000846818	NA
ENSMUSG00000059159	119.157	1.0931	0.280633	3.89511	9.81523e-05	0.000846873	NA
ENSMUSG00000028745	4692.28	0.260302	0.0668355	3.89466	9.83352e-05	0.000847954	Capzb
ENSMUSG00000020262	625.614	0.534954	0.137426	3.89267	9.91481e-05	0.000854462	Adarb1
ENSMUSG00000025364	5342.84	-0.257764	0.0662315	-3.89186	9.94797e-05	0.000856818	Pa2g4
ENSMUSG00000026260	1119.06	0.345114	0.0886797	3.8917	9.95463e-05	0.00085689	Ndufa10
ENSMUSG00000034329	510.922	0.440912	0.113337	3.89027	0.000100134	0.000861441	Brip1
ENSMUSG00000003814	10679	-0.255544	0.0656987	-3.88963	0.000100397	0.000863202	Calr
ENSMUSG00000073008	835.072	0.442893	0.113896	3.88857	0.000100837	0.000866482	Gpr174
ENSMUSG00000006728	3940.82	-0.277661	0.0714247	-3.88746	0.000101298	0.000869929	Cdk4
ENSMUSG00000037965	299.335	-0.584966	0.150648	-3.883	0.000103176	0.000885542	Zc3h7a
ENSMUSG00000041058	397.885	-0.461055	0.118824	-3.88014	0.000104396	0.000895266	Wwp1
ENSMUSG00000030231	279.737	0.61208	0.15775	3.88006	0.00010443	0.000895266	Plekha5
ENSMUSG00000117869	90.3898	-0.89269	0.230088	-3.87977	0.000104555	0.000895815	Snhg4
ENSMUSG00000099927	71.806	1.33312	0.343985	3.87552	0.000106396	0.000911057	Gm8226
ENSMUSG00000047963	35.5153	-1.63001	0.420798	-3.87361	0.000107233	0.00091751	Stbd1
ENSMUSG00000031378	198.814	0.633909	0.163652	3.87352	0.000107275	0.00091751	Abcd1
ENSMUSG00000019872	81.1971	0.937451	0.242095	3.87224	0.00010784	0.000921811	Smpdl3a
ENSMUSG00000033237	918.146	-0.405953	0.10487	-3.87103	0.000108378	0.000925871	Arid2
ENSMUSG00000050549	297.546	-0.586081	0.151419	-3.8706	0.000108566	0.000926685	Fam241a
ENSMUSG00000004317	196.611	-0.662978	0.171289	-3.87053	0.000108599	0.000926685	Clcn5
ENSMUSG00000034940	559.653	0.440076	0.113733	3.86938	0.000109112	0.000930517	Synrg
ENSMUSG00000038000	632.636	0.389102	0.100577	3.86868	0.000109425	0.000932651	Acd
ENSMUSG00000020827	1290.98	-0.320648	0.0828911	-3.8683	0.000109595	0.000933552	Mink1
ENSMUSG00000116504	79.2798	-0.973599	0.251703	-3.86805	0.000109709	0.000933988	I730030J21Rik
ENSMUSG00000098156	20.9661	-1.90963	0.494167	-3.86435	0.000111384	0.0009477	NA
ENSMUSG00000052139	247.303	0.58483	0.151356	3.86393	0.000111575	0.000948775	Babam2
ENSMUSG00000003363	595.168	0.403904	0.104537	3.86375	0.000111658	0.000948931	Pld3
ENSMUSG00000029169	4058.49	-0.249259	0.0645529	-3.86131	0.000112781	0.000957921	Dhx15
ENSMUSG00000032477	1613.94	-0.296911	0.0769183	-3.86008	0.00011335	0.000962203	Cdc25a
ENSMUSG00000032512	738.991	-0.362319	0.0938838	-3.85923	0.000113746	0.000965006	Wdr48
ENSMUSG00000112510	78.4024	0.975804	0.252883	3.85872	0.000113984	0.000966466	NA
ENSMUSG00000014294	500.218	0.413121	0.107068	3.85849	0.000114091	0.000966814	Ndufa2
ENSMUSG00000020802	703.612	-0.364518	0.0944982	-3.85741	0.000114594	0.00097052	Ube2o
ENSMUSG00000039095	4.66224	-5.63554	1.46167	-3.85556	0.000115466	NA	En2
ENSMUSG00000084215	30.3908	-1.52769	0.396328	-3.8546	0.000115918	0.000981167	NA
ENSMUSG00000061904	7695.18	0.264492	0.0686215	3.85436	0.00011603	0.000981554	Slc25a3
ENSMUSG00000025007	1494.46	0.814368	0.211332	3.85349	0.000116444	0.000983977	Aldh18a1
ENSMUSG00000103653	46.2896	1.48968	0.386581	3.85348	0.00011645	0.000983977	NA
ENSMUSG00000030002	1501.15	-0.309119	0.080252	-3.85185	0.000117227	0.000989966	Dusp11
ENSMUSG00000021990	1646.5	0.321924	0.0836129	3.85017	0.000118036	0.000996233	Spata13
ENSMUSG00000055717	422.107	0.474773	0.123452	3.84583	0.000120147	0.00101347	Slain1
ENSMUSG00000114235	56.0642	-1.09953	0.285977	-3.8448	0.00012065	0.00101713	NA
ENSMUSG00000029071	194.773	-0.628603	0.163609	-3.84211	0.000121981	0.00102775	Dvl1
ENSMUSG00000025515	7.2305	-5.27271	1.37318	-3.83977	0.00012315	0.00103701	Muc2
ENSMUSG00000069301	37.3027	1.35233	0.352214	3.8395	0.000123285	0.00103756	H2ac11
ENSMUSG00000097231	167.153	-0.658119	0.171451	-3.83852	0.00012378	0.00104113	NA
ENSMUSG00000073000	19.8947	2.06129	0.537161	3.83738	0.000124352	0.00104534	Ppp1r36dn
ENSMUSG00000061032	3241.6	-0.265529	0.0692053	-3.83684	0.000124628	0.00104706	Rrp1
ENSMUSG00000037994	349.142	0.51704	0.134771	3.83645	0.000124828	0.00104814	Slc9b2
ENSMUSG00000023908	475.941	-0.423232	0.110327	-3.83616	0.000124971	0.00104874	Pkmyt1
ENSMUSG00000041841	4533.72	0.309001	0.0806026	3.83363	0.000126265	0.001059	Rpl37
ENSMUSG00000041841	4533.72	0.309001	0.0806026	3.83363	0.000126265	0.001059	Rpl37rt
ENSMUSG00000061878	14.0574	-2.42903	0.633865	-3.8321	0.000127055	0.00106501	Sphk1
ENSMUSG00000036249	118.057	0.820686	0.214236	3.83076	0.000127747	0.00107021	Rbm43
ENSMUSG00000073838	1758.79	-0.296964	0.0775595	-3.82886	0.000128739	0.00107791	Tufm
ENSMUSG00000039046	312.735	0.489864	0.128034	3.82604	0.000130219	0.00108968	Usp6nl
ENSMUSG00000020528	310.068	0.518324	0.135498	3.82533	0.000130595	0.00109221	Prpsap2
ENSMUSG00000002881	576.454	0.402216	0.105218	3.82269	0.000132002	0.00110334	Nab1
ENSMUSG00000019139	1940.57	-0.306764	0.0802783	-3.82126	0.000132773	0.00110916	Isyna1
ENSMUSG00000032059	419.83	-0.468271	0.122551	-3.82105	0.000132886	0.00110947	Alg9
ENSMUSG00000029060	270.072	0.595954	0.156051	3.81898	0.000134005	0.00111818	Mib2
ENSMUSG00000054027	219.427	0.654146	0.171365	3.81726	0.000134944	0.00112537	Nt5dc3
ENSMUSG00000100150	99.1379	0.935404	0.245159	3.8155	0.000135909	0.00113278	Gm19585
ENSMUSG00000023809	21.9973	1.93674	0.507701	3.81472	0.000136338	0.00113525	Rps6ka2
ENSMUSG00000028572	566.096	-0.410732	0.107671	-3.81468	0.00013636	0.00113525	Hook1
ENSMUSG00000022370	1252.33	-0.402953	0.105679	-3.81298	0.000137304	0.00114246	Mrpl13
ENSMUSG00000003644	2181.41	0.303128	0.0795856	3.80883	0.000139624	0.00116112	Rps6ka1
ENSMUSG00000081824	70.5305	1.1295	0.296653	3.80746	0.0001404	0.00116644	NA
ENSMUSG00000047649	377.299	-0.48208	0.126618	-3.80734	0.000140467	0.00116644	Polr1g
ENSMUSG00000027778	388.889	0.481311	0.126418	3.80728	0.000140503	0.00116644	Ift80
ENSMUSG00000028826	296.001	-0.523775	0.137678	-3.80435	0.000142178	0.00117968	Maco1
ENSMUSG00000021311	817.005	0.364874	0.0959253	3.80373	0.000142531	0.00118195	Mtr
ENSMUSG00000026313	333.528	0.488739	0.128496	3.80352	0.000142654	0.0011823	Hdac4
ENSMUSG00000055435	46.9736	1.26574	0.332807	3.80323	0.000142824	0.00118304	Maf
ENSMUSG00000003038	4070.17	0.289908	0.076237	3.80272	0.000143114	0.00118477	Hmgn2
ENSMUSG00000032582	829.684	-0.374008	0.098428	-3.79981	0.000144806	0.00119811	Rbm6
ENSMUSG00000038608	1457.21	-0.464447	0.122285	-3.79808	0.000145822	0.00120584	Dock10
ENSMUSG00000017132	842.07	-0.350398	0.0922632	-3.79781	0.000145979	0.00120646	Cyth1
ENSMUSG00000039270	63.9296	1.04233	0.274605	3.79573	0.000147207	0.00121593	Megf9
ENSMUSG00000030291	295.726	-0.529116	0.139445	-3.79445	0.000147973	0.00122156	Med21
ENSMUSG00000030556	111.038	0.804326	0.212018	3.79368	0.000148433	0.00122468	Lrrc28
ENSMUSG00000029478	1402.87	0.373226	0.0983968	3.79307	0.000148794	0.00122697	Ncor2
ENSMUSG00000028737	120.077	0.822735	0.21692	3.7928	0.000148959	0.00122764	Aldh4a1
ENSMUSG00000102976	54.1123	-1.12669	0.297188	-3.79118	0.000149936	0.001235	Zc3h11a
ENSMUSG00000025076	206.042	0.583666	0.153965	3.7909	0.000150102	0.00123567	Casp7
ENSMUSG00000015222	39.6244	1.32983	0.35088	3.78998	0.000150661	0.00123958	Map2
ENSMUSG00000029404	466.422	-0.461303	0.122008	-3.78093	0.000156243	0.00128479	Arl6ip4
ENSMUSG00000021690	308.218	-0.488448	0.12922	-3.77997	0.000156847	0.00128904	Jmy
ENSMUSG00000067038	452.33	1.16768	0.308991	3.779	0.000157461	0.00129336	Rps12-ps3
ENSMUSG00000029103	257.642	0.624797	0.165421	3.777	0.000158729	0.00130305	Lrpap1
ENSMUSG00000106086	216.694	-0.581037	0.153925	-3.7748	0.000160134	0.00131385	NA
ENSMUSG00000036561	132.532	0.702431	0.186185	3.77276	0.000161455	0.00132395	Ppp6r2
ENSMUSG00000038143	24.6528	-1.99229	0.528448	-3.77008	0.000163196	0.00133748	Stox2
ENSMUSG00000022052	1834.87	-0.29407	0.0780185	-3.76923	0.000163753	0.0013413	Ppp2r2a
ENSMUSG00000015879	4.50965	-5.5871	1.4828	-3.76793	0.000164607	NA	Fam184b
ENSMUSG00000024186	8.55367	-3.99327	1.05989	-3.76764	0.000164795	0.00134908	Rgs11
ENSMUSG00000041328	614.997	-0.408798	0.108531	-3.76665	0.000165453	0.00135371	Pcf11
ENSMUSG00000040328	31.56	-1.52273	0.40436	-3.76578	0.000166029	0.00135767	Or2v1
ENSMUSG00000026683	755.782	0.349544	0.0928307	3.76539	0.000166292	0.00135906	Nuf2
ENSMUSG00000022800	765.993	-0.373102	0.0990911	-3.76524	0.000166386	0.00135908	Fyttd1
ENSMUSG00000055632	10.5845	2.85696	0.759477	3.76174	0.000168732	0.00137748	Hmcn2
ENSMUSG00000049354	2958.96	0.279085	0.0742018	3.76116	0.000169125	0.00137992	Dcaf7
ENSMUSG00000039427	321.945	0.479602	0.127528	3.76075	0.000169402	0.00138141	Alg1
ENSMUSG00000018199	135.466	-0.697051	0.185409	-3.75953	0.000170232	0.00138741	Ro60
ENSMUSG00000013646	344.804	-0.474444	0.126329	-3.75561	0.000172923	0.00140857	Sh3bp5l
ENSMUSG00000015605	1378.69	0.315737	0.0840792	3.75523	0.000173182	0.0014099	Srf
ENSMUSG00000025465	365.518	0.489023	0.130254	3.75437	0.000173777	0.00141396	Echs1
ENSMUSG00000026200	45.4337	-1.25401	0.334048	-3.75397	0.000174053	0.00141542	Glb1l
ENSMUSG00000033629	859.016	0.343793	0.0915983	3.75327	0.000174541	0.00141787	Hacd3
ENSMUSG00000032803	5279.16	-0.248277	0.0661497	-3.75326	0.000174547	0.00141787	Cdv3
ENSMUSG00000087612	220.412	0.74406	0.198262	3.75291	0.000174795	0.0014191	NA
ENSMUSG00000018507	432.373	0.564668	0.150537	3.75103	0.000176106	0.00142896	Trpv2
ENSMUSG00000120130	21.2806	1.95326	0.520747	3.75088	0.000176218	0.00142908	NA
ENSMUSG00000108888	205.347	-0.619982	0.165311	-3.75039	0.00017656	0.00143095	NA
ENSMUSG00000021252	747.318	0.417368	0.11129	3.75027	0.000176644	0.00143095	Erg28
ENSMUSG00000103175	30.904	-1.55697	0.415198	-3.74994	0.000176876	0.00143205	NA
ENSMUSG00000036693	1062.15	-0.315538	0.0841565	-3.74942	0.000177247	0.00143364	Nop14
ENSMUSG00000043263	37.2828	1.31969	0.351975	3.74939	0.000177269	0.00143364	Ifi209
ENSMUSG00000020657	157.674	0.662869	0.176943	3.74624	0.000179508	0.00145096	Dnajc27
ENSMUSG00000019889	33.3095	-1.39981	0.373697	-3.74583	0.000179799	0.00145251	Ptprk
ENSMUSG00000027677	381.362	-0.454669	0.121411	-3.74488	0.000180483	0.00145723	Ttc14
ENSMUSG00000097439	447.5	-0.447933	0.119651	-3.74367	0.000181355	0.00146348	NA
ENSMUSG00000029328	1910.5	-0.285737	0.0763571	-3.74211	0.00018248	0.00147157	Hnrnpdl
ENSMUSG00000044250	398.777	-0.443862	0.118616	-3.74199	0.000182569	0.00147157	Pced1b
ENSMUSG00000030319	3208.99	0.69242	0.185047	3.74187	0.000182659	0.00147157	Cand2
ENSMUSG00000000826	1754.22	-0.31753	0.0848826	-3.74081	0.000183427	0.00147695	Dnajc5
ENSMUSG00000033444	605.163	0.38569	0.103128	3.7399	0.000184091	0.00148149	Specc1l
ENSMUSG00000017499	1060.33	-0.323235	0.0864533	-3.73883	0.000184876	0.00148699	Cdc6
ENSMUSG00000045868	198.357	-0.68274	0.182659	-3.73778	0.000185655	0.00149244	Gvin1
ENSMUSG00002075113	39.9216	1.39199	0.372473	3.73715	0.000186118	0.00149454	NA
ENSMUSG00000043336	69.988	0.974317	0.260711	3.73715	0.00018612	0.00149454	Filip1l
ENSMUSG00000082741	56.4579	1.27355	0.34099	3.73485	0.000187829	0.00150745	Gm9703
ENSMUSG00000022336	5603.98	0.290149	0.0777489	3.73187	0.000190067	0.00152458	Eif3e
ENSMUSG00000026707	128.451	-0.752908	0.201762	-3.73166	0.000190222	0.00152499	Nsun6
ENSMUSG00000035392	200.965	0.61851	0.165837	3.72962	0.00019177	0.00153657	Dennd1a
ENSMUSG00000037552	769.929	0.360717	0.0967354	3.72891	0.000192313	0.00154007	Plekhg2
ENSMUSG00000026568	301.517	0.573374	0.153889	3.72589	0.000194624	0.00155773	Mpc2
ENSMUSG00000025016	4217.85	0.23484	0.0630437	3.72504	0.000195283	0.00156216	Tm9sf3
ENSMUSG00000110344	90.378	0.9206	0.247197	3.72416	0.000195967	0.00156678	Smim36
ENSMUSG00000047248	926.925	0.358033	0.0961494	3.72372	0.000196309	0.00156866	C2cd3
ENSMUSG00000028998	722.531	0.420183	0.112878	3.72244	0.000197309	0.00157502	Tomm7
ENSMUSG00000026000	213.016	0.561433	0.150825	3.72242	0.000197319	0.00157502	Lancl1
ENSMUSG00000050088	1185.91	0.308533	0.0829084	3.72138	0.000198141	0.00158072	1600012H06Rik
ENSMUSG00000055116	103.874	0.952212	0.255934	3.72054	0.000198794	0.00158507	Bmal1
ENSMUSG00000055170	447.765	-3.26869	0.878751	-3.7197	0.000199463	0.00158955	Ifng
ENSMUSG00000118097	15.4575	-2.33376	0.627533	-3.71894	0.000200059	0.00159343	NA
ENSMUSG00000014470	241.705	0.546651	0.147022	3.71815	0.000200684	0.00159754	Rnf166
ENSMUSG00000084319	1437.08	0.923042	0.248308	3.71732	0.000201343	0.00160193	NA
ENSMUSG00000040265	17.9843	1.94611	0.52355	3.71715	0.000201481	0.00160216	Dnm3
ENSMUSG00000021408	725.922	-0.356638	0.0959564	-3.71667	0.000201869	0.00160437	Ripk1
ENSMUSG00000021830	193.233	0.605488	0.162986	3.71496	0.000203234	0.00161325	Txndc16
ENSMUSG00000036817	571.023	-0.389805	0.104929	-3.71494	0.000203253	0.00161325	Sun1
ENSMUSG00000009894	307.292	0.50354	0.135547	3.71486	0.000203315	0.00161325	Snap47
ENSMUSG00000022452	977.403	0.341642	0.0920188	3.71274	0.000205028	0.00162597	Smdt1
ENSMUSG00000027907	213.912	0.604156	0.162731	3.7126	0.000205143	0.001626	S100a11
ENSMUSG00000000605	460.53	0.479223	0.129139	3.7109	0.000206528	0.0016361	Clcn4
ENSMUSG00000016619	2321.22	-0.260065	0.0701015	-3.70983	0.000207398	0.0016421	Nup50
ENSMUSG00000020167	1106.38	-0.361338	0.0974732	-3.70705	0.000209689	0.00165935	Tcf3
ENSMUSG00000030894	319.232	0.4781	0.129045	3.7049	0.000211472	0.00167256	Tpp1
ENSMUSG00000042772	1744.46	-0.276425	0.074651	-3.7029	0.000213149	0.00168492	Smg7
ENSMUSG00000038352	40.1015	1.25442	0.338876	3.7017	0.000214159	0.00169199	Arl5c
ENSMUSG00000030036	3283.02	-0.27349	0.0738913	-3.70124	0.000214547	0.00169415	Mogs
ENSMUSG00000045962	3957.07	0.376431	0.101718	3.70072	0.000214992	0.00169675	Wnk1
ENSMUSG00000001909	1066.91	0.323368	0.0874587	3.69738	0.000217833	0.00171825	Trmt1
ENSMUSG00000020042	190.328	0.663766	0.179689	3.69398	0.000220774	0.00174052	Abtb3
ENSMUSG00000062127	21.8376	-2.04572	0.553892	-3.69335	0.000221321	0.00174389	Cttnbp2nl
ENSMUSG00000031691	1649.62	-0.303827	0.0822771	-3.69272	0.000221866	0.00174726	Tnpo2
ENSMUSG00000117875	290.658	0.696239	0.188559	3.69243	0.000222122	0.00174833	NA
ENSMUSG00000021945	675.88	-0.378333	0.102488	-3.69149	0.000222942	0.00175385	Zmym2
ENSMUSG00000001444	1543.67	-1.35767	0.368052	-3.68879	0.000225324	0.00177164	Tbx21
ENSMUSG00000029313	524.308	0.483001	0.130994	3.6872	0.000226736	0.00178179	Aff1
ENSMUSG00000041774	2183.09	-0.273944	0.0743445	-3.68479	0.000228894	0.00179779	Ydjc
ENSMUSG00000023791	369.484	0.467087	0.126797	3.68374	0.000229833	0.0018042	Pigx
ENSMUSG00000040321	234.343	-0.597351	0.162194	-3.68295	0.000230554	0.0018089	Zfp770
ENSMUSG00000026553	3619.35	0.278177	0.0755376	3.68263	0.000230837	0.00181015	Copa
ENSMUSG00000032310	41.168	-1.45412	0.395326	-3.67828	0.00023481	0.00184033	Cyp1a2
ENSMUSG00000097154	132.283	0.828311	0.225225	3.67771	0.000235333	0.00184249	NA
ENSMUSG00000026289	267.701	-0.554399	0.15075	-3.6776	0.00023544	0.00184249	Atg16l1
ENSMUSG00000022354	89.327	0.894789	0.243309	3.67758	0.000235462	0.00184249	Ndufb9
ENSMUSG00000046556	264.175	0.511025	0.138964	3.6774	0.000235623	0.00184277	Zfp319
ENSMUSG00000035152	2614.8	0.27769	0.0755455	3.6758	0.000237107	0.00185339	Ap2b1
ENSMUSG00000035376	463.283	0.428147	0.11654	3.67381	0.000238961	0.00186689	Hacd2
ENSMUSG00000020134	1428.41	-0.316275	0.0861005	-3.67332	0.000239415	0.00186945	Peli1
ENSMUSG00000039637	434.681	0.453319	0.123435	3.67253	0.000240165	0.00187431	Coro7
ENSMUSG00000120198	55.2698	-1.13228	0.308383	-3.67168	0.000240965	0.00187955	NA
ENSMUSG00000029191	1481.85	-0.293711	0.0800037	-3.67121	0.000241402	0.00188196	Rfc1
ENSMUSG00000067825	96.4716	-0.853952	0.23276	-3.66882	0.000243676	0.00189869	Pex26
ENSMUSG00000031221	554.735	0.403435	0.109979	3.66829	0.000244178	0.00190159	Igbp1
ENSMUSG00000026739	689.555	0.359883	0.0981574	3.66638	0.000246007	0.00191482	Bmi1
ENSMUSG00000066441	769.499	-0.401901	0.109629	-3.66601	0.000246366	0.0019166	Rdh11
ENSMUSG00000020437	1125.72	-0.352775	0.0962619	-3.66474	0.000247592	0.00192512	Myo1g
ENSMUSG00000028048	239.079	0.549032	0.149823	3.66454	0.00024778	0.00192556	Gba
ENSMUSG00000002668	160.494	0.669697	0.182797	3.6636	0.000248691	0.00193163	Dennd1c
ENSMUSG00000037458	2106.87	0.306657	0.0837074	3.66344	0.000248855	0.00193187	Azin1
ENSMUSG00000027737	12.4625	2.58986	0.707333	3.66144	0.000250802	0.00194554	Slc7a11
ENSMUSG00000027775	477.431	0.398643	0.108878	3.66136	0.00025088	0.00194554	Mfsd1
ENSMUSG00000019883	824.602	-0.335058	0.0915247	-3.66084	0.000251388	0.00194845	Echdc1
ENSMUSG00000033712	925.141	-0.322061	0.0879834	-3.66047	0.000251753	0.00195026	Ccar2
ENSMUSG00000034881	53.4178	1.10752	0.302581	3.66022	0.000251996	0.00195111	Tbxa2r
ENSMUSG00000007029	4515.43	-0.267243	0.0730471	-3.6585	0.000253692	0.00196321	Vars
ENSMUSG00000073616	436.619	0.474431	0.129689	3.65822	0.000253973	0.00196435	Cops9
ENSMUSG00000022521	588.809	0.413282	0.113015	3.65689	0.000255296	0.00197354	Crebbp
ENSMUSG00000028108	169.431	0.635672	0.173849	3.65647	0.000255715	0.00197574	Ecm1
ENSMUSG00000027673	873.095	0.345489	0.0945573	3.65376	0.000258432	0.00199569	Ndufb5
ENSMUSG00000071341	38.1333	1.38837	0.38006	3.65304	0.000259155	0.00200022	Egr4
ENSMUSG00000029176	890.829	0.50142	0.137305	3.65188	0.000260331	0.00200825	Anapc4
ENSMUSG00000046574	738.549	0.37551	0.102836	3.65154	0.000260675	0.00200985	Prr12
ENSMUSG00000104605	296.788	0.64113	0.175601	3.65105	0.00026117	0.00201261	NA
ENSMUSG00000085795	297.56	0.498803	0.136656	3.65007	0.000262164	0.00201921	Zfp703
ENSMUSG00000079316	278.521	-0.52502	0.143848	-3.64982	0.000262421	0.00202013	Rab9
ENSMUSG00000006705	618.756	-0.384306	0.105371	-3.64718	0.000265134	0.00203908	Pknox1
ENSMUSG00000032369	874.208	-0.33434	0.0916715	-3.64716	0.000265159	0.00203908	Plscr1
ENSMUSG00000056692	2686.36	-0.343445	0.0942815	-3.64276	0.000269727	0.00207312	Ilrun
ENSMUSG00000066571	451.027	-0.472819	0.129812	-3.64233	0.000270185	0.00207555	Garre1
ENSMUSG00000098123	38.179	-1.42	0.390047	-3.6406	0.000272007	0.00208846	NA
ENSMUSG00000037353	344.34	0.449052	0.123411	3.63867	0.000274054	0.00210308	Letmd1
ENSMUSG00000021263	269.618	0.525977	0.144618	3.63701	0.000275823	0.00211555	Degs2
ENSMUSG00000007891	359.38	0.497881	0.136986	3.63453	0.000278483	0.00213484	Ctsd
ENSMUSG00000118664	1021.35	0.319112	0.0878072	3.63423	0.000278811	0.0021357	Tusc3
ENSMUSG00000048310	349.721	0.482349	0.132726	3.63416	0.000278885	0.0021357	Pskh1
ENSMUSG00000022661	4118.79	-0.286491	0.0788356	-3.63403	0.000279031	0.00213571	Cd200
ENSMUSG00000021901	1102.89	-0.312871	0.0861176	-3.63307	0.000280067	0.00214252	Bap1
ENSMUSG00000087669	299.946	0.468394	0.128942	3.63258	0.000280601	0.00214549	NA
ENSMUSG00000047215	14285.2	0.267858	0.0737728	3.63085	0.000282492	0.00215883	Rpl9
ENSMUSG00000039157	1324.52	-0.358921	0.09887	-3.63023	0.000283169	0.00216287	Eeig1
ENSMUSG00000033578	34.3218	-1.4174	0.390485	-3.62985	0.000283591	0.00216498	Tmem35a
ENSMUSG00000041264	638.826	-0.367519	0.101254	-3.62968	0.000283777	0.00216527	Uspl1
ENSMUSG00000021065	153.646	0.6813	0.187794	3.62792	0.000285714	0.00217892	Fut8
ENSMUSG00000019951	691.82	0.399437	0.110116	3.62744	0.000286251	0.00218188	Bltp3b
ENSMUSG00000030284	121.5	-0.734816	0.202677	-3.62556	0.000288337	0.00219664	Creld1
ENSMUSG00000071343	15.2673	-2.20235	0.607593	-3.62471	0.000289282	0.00220241	Gm10327
ENSMUSG00000040105	137.685	0.756339	0.208668	3.62461	0.000289393	0.00220241	Plpp6
ENSMUSG00000073198	17.7622	-2.07589	0.572788	-3.62419	0.000289864	0.00220406	Bnip3l-ps
ENSMUSG00000025243	619.116	0.377023	0.104031	3.62415	0.00028991	0.00220406	Slc6a20b
ENSMUSG00000025935	1679.47	0.287797	0.0794546	3.62215	0.000292164	0.00222006	Tram1
ENSMUSG00000024935	9.73583	3.18565	0.879525	3.62201	0.000292324	0.00222012	Slc1a1
ENSMUSG00000089764	244.893	0.644377	0.178128	3.61749	0.000297477	0.00225809	Gm16580
ENSMUSG00000082575	237.96	0.622616	0.172128	3.61716	0.000297849	0.00225906	Eef2-ps2
ENSMUSG00000025324	1217.3	0.380053	0.105071	3.61711	0.000297912	0.00225906	Atp10a
ENSMUSG00000020290	3528.18	-0.246138	0.0680522	-3.6169	0.00029815	0.0022597	Xpo1
ENSMUSG00000067367	2320.97	-0.283156	0.0783017	-3.61623	0.00029893	0.00226445	Lyar
ENSMUSG00000090150	161.369	0.668161	0.184805	3.61548	0.00029979	0.0022698	Acad11
ENSMUSG00000050350	335.303	-0.533354	0.147553	-3.61467	0.000300734	0.00227577	Gpr18
ENSMUSG00000028456	37.5706	-1.26209	0.349194	-3.6143	0.000301162	0.00227784	Unc13b
ENSMUSG00000027395	1366.99	-0.343844	0.0951719	-3.61288	0.000302817	0.00228918	Polr1b
ENSMUSG00000076490	1266.17	0.31922	0.0883936	3.61135	0.00030461	0.00230155	NA
ENSMUSG00000046718	692.714	-0.390476	0.108164	-3.61005	0.00030614	0.0023118	Bst2
ENSMUSG00000026573	117.616	0.720451	0.199575	3.60993	0.000306281	0.0023118	Xcl1
ENSMUSG00000092381	857.981	-0.32601	0.0903193	-3.60953	0.000306752	0.00231417	NA
ENSMUSG00000022387	781.852	-0.333817	0.0925957	-3.60511	0.000312026	0.00235275	Brd1
ENSMUSG00000026970	290.479	0.555579	0.15422	3.60251	0.00031516	0.00237516	Rbms1
ENSMUSG00000019734	27.8568	-1.49541	0.415146	-3.60212	0.000315628	0.00237747	Tmc4
ENSMUSG00000020248	701.027	-0.361013	0.100243	-3.60138	0.000316535	0.00238308	Nfyb
ENSMUSG00000030655	1352.03	-0.462167	0.128344	-3.60101	0.000316987	0.00238526	Smg1
ENSMUSG00000025949	365.31	-0.458614	0.127368	-3.60069	0.000317374	0.00238696	Pikfyve
ENSMUSG00000078853	2885.42	-0.876058	0.24337	-3.59969	0.000318596	0.00239493	Igtp
ENSMUSG00000066043	141.102	-0.668249	0.185666	-3.5992	0.000319192	0.00239818	Phactr4
ENSMUSG00000063362	241.61	-0.53562	0.148841	-3.59861	0.000319921	0.00240243	Alg11
ENSMUSG00000017288	573.764	0.388026	0.10784	3.59815	0.000320488	0.00240546	Vps53
ENSMUSG00000097415	531.268	-0.400842	0.111434	-3.59713	0.000321753	0.00241372	AU020206
ENSMUSG00000073096	174.879	0.598602	0.166468	3.59589	0.000323285	0.00242397	Lrrc61
ENSMUSG00000062647	16619.1	0.252897	0.0703839	3.59311	0.00032675	0.00244871	Rpl7a
ENSMUSG00000118101	9.02056	-3.27424	0.911592	-3.59178	0.000328427	0.00246002	NA
ENSMUSG00000109865	1269.84	-0.306596	0.0855249	-3.58488	0.00033724	0.00252475	Hspa14
ENSMUSG00000038957	1015.09	-0.300513	0.0838405	-3.58435	0.000337923	0.00252837	Edc3
ENSMUSG00000027823	2289.93	-0.247608	0.0690824	-3.58424	0.000338067	0.00252837	Gmps
ENSMUSG00000052151	55.8225	-1.06578	0.297381	-3.5839	0.000338501	0.00253033	Plpp2
ENSMUSG00000052085	1402.82	0.322818	0.0900948	3.5831	0.000339541	0.00253682	Dock8
ENSMUSG00000035505	139.505	0.647898	0.180829	3.58294	0.000339748	0.00253707	Cox18
ENSMUSG00000027194	232.312	0.531853	0.148452	3.58267	0.000340102	0.00253843	Ttc17
ENSMUSG00000028603	844.845	0.356149	0.0994189	3.58231	0.000340573	0.00253864	Scp2
ENSMUSG00000044167	842.157	0.325231	0.0907887	3.58229	0.000340597	0.00253864	Foxo1
ENSMUSG00000039850	114.837	0.720112	0.201022	3.58225	0.000340648	0.00253864	Endov
ENSMUSG00000003534	541.928	-0.53578	0.149585	-3.58177	0.000341269	0.00254149	Ddr1
ENSMUSG00000029610	975.87	-0.319862	0.0893047	-3.58169	0.000341377	0.00254149	Aimp2
ENSMUSG00000009563	475.637	0.404071	0.112833	3.58114	0.000342098	0.00254461	Tor2a
ENSMUSG00000012405	8417.27	0.253231	0.0707151	3.58101	0.000342272	0.00254461	Rpl15
ENSMUSG00000035401	570.31	-0.377506	0.10542	-3.58097	0.000342315	0.00254461	Emsy
ENSMUSG00000032946	39.0727	1.2415	0.346709	3.58081	0.000342534	0.00254496	Rasgrp2
ENSMUSG00000066363	326.491	-3.04021	0.84991	-3.57709	0.00034744	0.0025801	Serpina3f
ENSMUSG00000015759	928.75	0.374803	0.104811	3.57597	0.000348927	0.00258984	Cnih1
ENSMUSG00000042444	590.315	-0.367719	0.102836	-3.57577	0.000349199	0.00259055	Mindy2
ENSMUSG00000008305	85.7452	-0.928762	0.259884	-3.57376	0.00035189	0.00260815	Tle1
[truncated: 17,256 more rows]

## Sheet: p0.05 downregulated (DN, 5168)
ems	baseMean	log2FoldChange	lfcSE	stat	pvalue	padj	SYMBOL
ENSMUSG00000037161	55.8594	-7.34928	1.05159	-6.98872	2.77402e-12	9.01544e-11	Mgarp
ENSMUSG00000035186	28.4993	-6.37369	1.0805	-5.89886	3.66028e-09	7.91859e-08	Ubd
ENSMUSG00000097558	49.2052	-6.15938	0.785577	-7.84058	4.48462e-15	1.95187e-13	NA
ENSMUSG00000040680	10.5624	-5.8284	1.31313	-4.43857	9.05597e-06	0.00010193	Kremen2
ENSMUSG00000039095	4.66224	-5.63554	1.46167	-3.85556	0.000115466	NA	En2
ENSMUSG00000015879	4.50965	-5.5871	1.4828	-3.76793	0.000164607	NA	Fam184b
ENSMUSG00000073421	357.441	-5.41887	0.241261	-22.4606	1.00713e-111	5.29141e-109	H2-Ab1
ENSMUSG00000062168	3.88146	-5.36964	1.5075	-3.56195	0.000368106	NA	Ppef1
ENSMUSG00000025515	7.2305	-5.27271	1.37318	-3.83977	0.00012315	0.00103701	Muc2
ENSMUSG00000050370	91.3999	-5.22526	0.435767	-11.991	3.96283e-33	5.20511e-31	Ch25h
ENSMUSG00000113619	3.47042	-5.21379	1.5861	-3.28717	0.00101198	NA	NA
ENSMUSG00000045667	43.4027	-5.14932	0.620285	-8.30154	1.0277e-16	5.14234e-15	Smtnl2
ENSMUSG00000037820	531.027	-5.12805	0.202795	-25.2868	4.46048e-141	2.98264e-138	Tgm2
ENSMUSG00000031637	152.877	-5.06952	0.324788	-15.6087	6.35485e-55	1.58451e-52	Lrp2bp
ENSMUSG00000109881	773.413	-5.04135	0.158918	-31.7229	7.50154e-221	1.22617e-217	NA
ENSMUSG00000092283	182.885	-5.02856	0.313029	-16.0642	4.54429e-58	1.17283e-55	NA
ENSMUSG00000078566	1142.51	-4.97496	0.133224	-37.3428	3.31539e-305	8.12879e-302	Bnip3
ENSMUSG00000112705	2.76809	-4.88039	1.66876	-2.92455	0.0034495	NA	NA
ENSMUSG00000035105	4952.41	-4.86445	0.184536	-26.3604	3.89954e-153	3.37448e-150	Egln3
ENSMUSG00000045725	9.48065	-4.74678	1.1916	-3.98355	6.78935e-05	0.000611998	Prr15
ENSMUSG00000120549	5.01162	-4.72619	1.43146	-3.30165	0.000961179	NA	NA
ENSMUSG00000038496	18.4398	-4.70508	0.836444	-5.62509	1.85407e-08	3.53765e-07	Slc19a3
ENSMUSG00000087086	2.45049	-4.70371	1.68772	-2.78701	0.00531964	NA	NA
ENSMUSG00000031760	2.43077	-4.69395	1.6893	-2.77863	0.00545888	NA	Mt3
ENSMUSG00000025348	27.0431	-4.67107	0.698101	-6.69111	2.21489e-11	6.32684e-10	Itga7
ENSMUSG00000028527	1466.1	-4.63557	0.117216	-39.5474	0	0	Ak4
ENSMUSG00000003153	4996.33	-4.62292	0.0900289	-51.3493	0	0	Slc2a3
ENSMUSG00000114755	2.29533	-4.60865	1.73805	-2.65162	0.00801075	NA	Galr3
ENSMUSG00000057457	47.4641	-4.60766	0.515103	-8.94512	3.71556e-19	2.24936e-17	Phex
ENSMUSG00000117745	2.24861	-4.58377	1.71724	-2.66926	0.00760182	NA	NA
ENSMUSG00000072594	4.54085	-4.57852	1.47511	-3.10386	0.00191016	NA	NA
ENSMUSG00000020836	2.11803	-4.49399	1.74818	-2.57067	0.0101501	NA	Coro6
ENSMUSG00000034161	2.10574	-4.48699	1.7414	-2.57667	0.00997585	NA	Scx
ENSMUSG00000112501	2.07131	-4.46698	1.80253	-2.47818	0.0132055	NA	NA
ENSMUSG00000006567	58.8103	-4.45576	0.465247	-9.57719	9.97183e-22	7.33478e-20	Atp7b
ENSMUSG00000024924	116.758	-4.44919	0.327662	-13.5786	5.36518e-42	9.50929e-40	Vldlr
ENSMUSG00000065434	1.98002	-4.3941	1.82585	-2.4066	0.0161019	NA	Mir7-1
ENSMUSG00000118144	1.98002	-4.3941	1.82585	-2.4066	0.0161019	NA	NA
ENSMUSG00000113520	7.4733	-4.38675	1.23029	-3.56562	0.000363001	0.00267943	Gm4257
ENSMUSG00000094690	1.96044	-4.38203	1.82835	-2.39671	0.0165429	NA	1600014C23Rik
ENSMUSG00000083458	1.94816	-4.37433	1.81019	-2.4165	0.0156704	NA	NA
ENSMUSG00000038550	91.6702	-4.36432	0.35231	-12.3877	3.04569e-35	4.2269e-33	Ciart
ENSMUSG00000017390	122.703	-4.33601	0.311472	-13.9211	4.71892e-44	8.57038e-42	Aldoc
ENSMUSG00000025014	28.7773	-4.33174	0.622038	-6.96379	3.31245e-12	1.05783e-10	Dntt
ENSMUSG00000052821	14.1464	-4.30531	0.871707	-4.93894	7.85474e-07	1.10364e-05	Cysltr1
ENSMUSG00000112481	6.96884	-4.27911	1.22786	-3.48502	0.000492108	0.00348551	Gm29684
ENSMUSG00000049154	1.81744	-4.27011	1.86765	-2.28636	0.0222334	NA	Fam183b
ENSMUSG00000116289	1.80029	-4.25842	1.8362	-2.31914	0.0203872	NA	NA
ENSMUSG00000038973	1.79543	-4.25533	1.86371	-2.28325	0.0224155	NA	Cldnd2
ENSMUSG00000065642	1.77815	-4.24351	1.84005	-2.30619	0.0210999	NA	Snora69
ENSMUSG00000103253	1.77329	-4.24029	1.82731	-2.32051	0.0203132	NA	NA
ENSMUSG00000050914	191.472	-4.23415	0.257518	-16.4421	9.55083e-61	2.86739e-58	Ankrd37
ENSMUSG00000102593	1.75857	-4.23031	1.84355	-2.29465	0.021753	NA	NA
ENSMUSG00000109684	1.74871	-4.22351	1.85355	-2.2786	0.0226906	NA	NA
ENSMUSG00000027670	3.55607	-4.2101	1.52154	-2.767	0.00565756	NA	Ocstamp
ENSMUSG00000025161	4372.25	-4.17553	0.0912208	-45.7739	0	0	Slc16a3
ENSMUSG00000115862	3.38079	-4.13826	1.5371	-2.69225	0.00709713	NA	NA
ENSMUSG00000120260	1.65242	-4.13272	1.91997	-2.15249	0.0313589	NA	NA
ENSMUSG00000098488	1.64756	-4.12913	1.91319	-2.15824	0.0309093	NA	Pla2g4b
ENSMUSG00000022468	1.63771	-4.12166	1.88808	-2.18299	0.0290363	NA	Endou
ENSMUSG00000045094	1.63771	-4.12166	1.88808	-2.18299	0.0290363	NA	Arhgef37
ENSMUSG00000040775	1.62542	-4.1126	1.8907	-2.17518	0.0296168	NA	Gm9772
ENSMUSG00000096959	1.62056	-4.10904	1.87805	-2.18793	0.0286744	NA	4930509G22Rik
ENSMUSG00000024600	1.60827	-4.09995	1.88069	-2.18002	0.0292559	NA	Slc27a6
ENSMUSG00000117861	1.59113	-4.087	1.92581	-2.12223	0.0338187	NA	NA
ENSMUSG00000120341	1.59113	-4.087	1.92581	-2.12223	0.0338187	NA	NA
ENSMUSG00000026890	3.28461	-4.08626	1.57306	-2.59765	0.00938645	NA	Lhx6
ENSMUSG00000086255	1.57884	-4.0776	1.93658	-2.10556	0.0352423	NA	NA
ENSMUSG00000035148	1.57641	-4.07491	2.0527	-1.98515	0.0471278	NA	Gpr33
ENSMUSG00000057914	20.9737	-4.06171	0.684418	-5.93455	2.94645e-09	6.51807e-08	Cacnb2
ENSMUSG00000034842	3.2089	-4.05604	1.56217	-2.59641	0.00942029	NA	Art3
ENSMUSG00000112762	11.4811	-3.99414	0.934144	-4.27572	1.9052e-05	0.000197237	4930459C07Rik
ENSMUSG00000024186	8.55367	-3.99327	1.05989	-3.76764	0.000164795	0.00134908	Rgs11
ENSMUSG00000063129	3.04833	-3.98188	1.57331	-2.53089	0.0113774	NA	Aldoart2
ENSMUSG00000031214	1.48498	-3.97882	1.9722	-2.01745	0.0436484	NA	Ophn1
ENSMUSG00000087016	1.48498	-3.97882	1.9722	-2.01745	0.0436484	NA	NA
ENSMUSG00000113010	1.46783	-3.96468	1.94391	-2.03954	0.0413961	NA	Gm34084
ENSMUSG00000016982	1.46297	-3.96088	1.99441	-1.98599	0.0470348	NA	Pom121l2
ENSMUSG00000113977	1.45555	-3.9546	1.93838	-2.04016	0.0413341	NA	NA
ENSMUSG00000026805	1.44083	-3.94249	1.95122	-2.02053	0.0433285	NA	Barhl1
ENSMUSG00000034059	1.42611	-3.93005	1.98856	-1.97633	0.048117	NA	Ypel4
ENSMUSG00000106123	1.42611	-3.93005	1.98856	-1.97633	0.048117	NA	NA
ENSMUSG00000111656	1.42611	-3.93005	1.98856	-1.97633	0.048117	NA	NA
ENSMUSG00000035860	10.9507	-3.90912	0.925065	-4.22578	2.38114e-05	0.000240418	Cdhr3
ENSMUSG00000020399	2.87103	-3.89194	1.60844	-2.41969	0.0155335	NA	Havcr2
ENSMUSG00000054978	13.1383	-3.85828	0.818957	-4.71121	2.46256e-06	3.13923e-05	Kbtbd13
ENSMUSG00000021367	20.8681	-3.84739	0.659189	-5.83655	5.32933e-09	1.11681e-07	Edn1
ENSMUSG00000009248	5.27214	-3.84248	1.34284	-2.86145	0.00421706	NA	Ascl2
ENSMUSG00000020646	85.9607	-3.83727	0.346335	-11.0797	1.57448e-28	1.60849e-26	Mboat2
ENSMUSG00000117062	2.76746	-3.82989	1.61037	-2.37827	0.0173941	NA	NA
ENSMUSG00000106333	2.73314	-3.81099	1.61882	-2.35418	0.0185635	NA	4930428O21Rik
ENSMUSG00000055493	2.72615	-3.80647	1.61839	-2.35201	0.0186722	NA	Epm2a
ENSMUSG00000117627	4.99324	-3.77181	1.32413	-2.84851	0.00439241	NA	NA
ENSMUSG00000044313	7.38983	-3.75347	1.07657	-3.48651	0.000489366	0.00346776	Mab21l3
ENSMUSG00000031765	599.018	-3.74974	0.144039	-26.0329	2.10289e-149	1.62819e-146	Mt1
ENSMUSG00000071537	2.60741	-3.73451	1.63419	-2.28523	0.0222991	NA	Klrg2
ENSMUSG00000118550	2.54844	-3.70943	1.64925	-2.24917	0.0245018	NA	NA
ENSMUSG00000114708	16.4713	-3.69039	0.717866	-5.14078	2.73598e-07	4.22783e-06	NA
ENSMUSG00000041481	58.7838	-3.68181	0.398845	-9.23118	2.67674e-20	1.82304e-18	Serpina3g
ENSMUSG00000018830	6.93323	-3.6645	1.08449	-3.37902	0.000727448	0.00487762	Myh11
ENSMUSG00000067780	2.46012	-3.64219	1.83661	-1.98311	0.0473556	NA	Pi15
ENSMUSG00000018914	59.2667	-3.63622	0.389464	-9.33647	9.95967e-21	6.97699e-19	Il3
ENSMUSG00000120051	2.42028	-3.62603	1.66167	-2.18216	0.0290978	NA	NA
ENSMUSG00000041566	2.41283	-3.61771	1.7908	-2.02016	0.0433667	NA	Tssk1
ENSMUSG00000060621	2.40598	-3.61324	1.66713	-2.16734	0.0302091	NA	Nkpd1
ENSMUSG00000053318	2.40355	-3.6119	1.67908	-2.15112	0.0314668	NA	Slamf8
ENSMUSG00000069376	4.29392	-3.55076	1.37827	-2.57624	0.00998807	NA	Gm5507
ENSMUSG00000118217	2.31226	-3.54356	1.76726	-2.00511	0.0449512	NA	Gm6951
ENSMUSG00000105719	2.28724	-3.53064	1.69681	-2.08075	0.0374569	NA	NA
ENSMUSG00000064919	2.29011	-3.53063	1.69637	-2.08128	0.0374079	NA	Gm22572
ENSMUSG00000097604	23.0475	-3.50522	0.59224	-5.91858	3.24726e-09	7.10869e-08	NA
ENSMUSG00000041075	149.706	-3.49321	0.244205	-14.3044	2.05467e-46	3.97715e-44	Fzd7
ENSMUSG00000047261	26.6703	-3.46864	0.554246	-6.25831	3.89174e-10	9.65452e-09	Gap43
ENSMUSG00000035273	24.2333	-3.44265	0.564177	-6.10207	1.04702e-09	2.44875e-08	Hpse
ENSMUSG00000043050	4.0253	-3.43467	1.40523	-2.44421	0.0145169	NA	Tnp2
ENSMUSG00000038451	73.5776	-3.42656	0.339016	-10.1074	5.12458e-24	4.25919e-22	Spsb2
ENSMUSG00000036832	33.987	-3.42605	0.471624	-7.26436	3.74798e-13	1.34479e-11	Lpar3
ENSMUSG00000120171	2.13198	-3.42398	1.72625	-1.98348	0.0473141	NA	NA
ENSMUSG00000031762	241.039	-3.42385	0.191762	-17.8547	2.65825e-71	9.31084e-69	Mt2
ENSMUSG00000018906	215.514	-3.40723	0.201783	-16.8856	5.74177e-64	1.87705e-61	P4ha2
ENSMUSG00000028654	2.09269	-3.40042	1.71783	-1.97949	0.0477606	NA	Mycl
ENSMUSG00000031104	3.86277	-3.39268	1.39294	-2.43563	0.0148659	NA	Rab33a
ENSMUSG00000006221	13.3441	-3.34333	0.757667	-4.41267	1.02105e-05	0.000113022	Hspb7
ENSMUSG00000022218	14.7305	-3.29378	0.71376	-4.61469	3.93691e-06	4.73943e-05	Tgm1
ENSMUSG00000118101	9.02056	-3.27424	0.911592	-3.59178	0.000328427	0.00246002	NA
ENSMUSG00000055170	447.765	-3.26869	0.878751	-3.7197	0.000199463	0.00158955	Ifng
ENSMUSG00000001663	78.6828	-3.24792	0.322697	-10.0649	7.89471e-24	6.45217e-22	Gstt1
ENSMUSG00000026628	814.92	-3.20717	0.115809	-27.6935	8.37044e-169	8.79554e-166	Atf3
ENSMUSG00000111394	106.05	-3.15135	0.288642	-10.9178	9.47207e-28	9.35192e-26	NA
ENSMUSG00000084020	6.63252	-3.12907	1.01453	-3.08426	0.00204056	0.0115147	NA
ENSMUSG00000052117	137.405	-3.1246	0.232882	-13.4171	4.79988e-41	8.21058e-39	D630039A03Rik
ENSMUSG00000051606	3.30883	-3.10968	1.45285	-2.1404	0.0323226	NA	NA
ENSMUSG00000081957	3.28712	-3.09609	1.45195	-2.13237	0.0329765	NA	NA
ENSMUSG00000023456	13380.7	-3.09261	0.0718664	-43.0328	0	0	Tpi1
ENSMUSG00000032327	14.3535	-3.07345	0.707405	-4.34469	1.39473e-05	0.000149004	Stra6
ENSMUSG00000022805	3.19552	-3.06826	1.49242	-2.0559	0.0397919	NA	Cfap91
ENSMUSG00000046794	121.352	-3.06669	0.247036	-12.414	2.19487e-35	3.10468e-33	Ppp1r3b
ENSMUSG00000116678	19.1276	-3.06534	0.605202	-5.06499	4.08423e-07	6.11222e-06	NA
ENSMUSG00000067889	26.9053	-3.04899	0.508327	-5.99808	1.99665e-09	4.53983e-08	Sptbn2
ENSMUSG00000037060	50.3097	-3.04666	0.365961	-8.3251	8.42579e-17	4.28899e-15	Cavin3
ENSMUSG00000066363	326.491	-3.04021	0.84991	-3.57709	0.00034744	0.0025801	Serpina3f
ENSMUSG00000110588	231.434	-3.0357	0.186529	-16.2747	1.49369e-59	4.14598e-57	NA
ENSMUSG00000024922	6.17368	-3.02801	1.04323	-2.90254	0.0037015	0.0191129	Ovol1
ENSMUSG00000054161	3.09469	-3.01931	1.43954	-2.0974	0.0359578	NA	Fam83e
ENSMUSG00000031803	47.1552	-2.98746	0.374341	-7.98059	1.45638e-15	6.57202e-14	B3gnt3
ENSMUSG00000043953	3.04809	-2.98647	1.45792	-2.04844	0.0405165	NA	Ccrl2
ENSMUSG00000035370	4.54702	-2.98409	1.17294	-2.54412	0.0109555	NA	NA
ENSMUSG00000070443	6.06317	-2.97292	1.05889	-2.80759	0.00499133	0.0243057	Gm10291
ENSMUSG00000080994	4.42588	-2.95075	1.23825	-2.38299	0.0171724	NA	Gm13464
ENSMUSG00000091412	51.7802	-2.94873	0.36104	-8.1673	3.15358e-16	1.51115e-14	NA
ENSMUSG00000055446	8.90546	-2.94728	0.870835	-3.38444	0.000713247	0.0047999	NA
ENSMUSG00000111088	2.94653	-2.94371	1.49377	-1.97066	0.0487632	NA	NA
ENSMUSG00000027718	2.92438	-2.93333	1.4623	-2.00597	0.0448597	NA	Il21
ENSMUSG00000005125	445.37	-2.92909	0.149253	-19.6251	9.44656e-86	3.65706e-83	Ndrg1
ENSMUSG00000003452	8.74402	-2.92737	0.846427	-3.4585	0.000543183	0.00378351	Bicd1
ENSMUSG00000092981	5.8883	-2.92542	1.08585	-2.69414	0.00705709	0.0319929	Mir5125
ENSMUSG00000050473	23.3398	-2.92509	0.526163	-5.55929	2.70868e-08	5.05678e-07	Slc35d3
ENSMUSG00000026630	20.5075	-2.92359	0.557928	-5.24009	1.60497e-07	2.60892e-06	Batf3
ENSMUSG00000115154	5.84175	-2.92256	1.03027	-2.83668	0.00455852	0.0226785	NA
ENSMUSG00000105742	2.92237	-2.91405	1.4573	-1.99963	0.0455405	NA	NA
ENSMUSG00000004328	17.1075	-2.87648	0.619034	-4.64672	3.37252e-06	4.14479e-05	Hif3a
ENSMUSG00000119956	22.5612	-2.8697	0.549752	-5.21999	1.78929e-07	2.88622e-06	NA
ENSMUSG00000067279	4.25838	-2.86835	1.25015	-2.29441	0.0217668	NA	Ppp1r3c
ENSMUSG00000026787	4.27398	-2.86618	1.22033	-2.3487	0.0188389	NA	Gad2
ENSMUSG00000032092	45.0537	-2.86576	0.395961	-7.2375	4.57045e-13	1.60851e-11	Mpzl2
ENSMUSG00000020014	115.632	-2.86538	0.240857	-11.8966	1.23276e-32	1.5908e-30	Cfap54
ENSMUSG00000002799	142.689	-2.83328	0.222575	-12.7295	4.05373e-37	5.96345e-35	Jag2
ENSMUSG00000106755	35.9813	-2.83231	0.415829	-6.81124	9.67606e-12	2.88731e-10	NA
ENSMUSG00000020277	4625.92	-2.80162	0.0722778	-38.7618	0	0	Pfkl
ENSMUSG00000086894	4.05727	-2.79401	1.25398	-2.2281	0.0258736	NA	Gm15708
ENSMUSG00000105600	5.28056	-2.76091	1.08942	-2.5343	0.0112674	NA	NA
ENSMUSG00000073433	46.0647	-2.74946	0.367583	-7.47984	7.44133e-14	2.88837e-12	Arhgdig
ENSMUSG00000106535	3.95083	-2.74913	1.23111	-2.23305	0.0255457	NA	NA
ENSMUSG00000049109	653.322	-2.74792	0.128841	-21.328	6.2439e-101	2.87044e-98	Themis
ENSMUSG00000023959	7.86004	-2.7373	0.875483	-3.12662	0.00176831	0.0102234	Clic5
ENSMUSG00000021675	24.4528	-2.73291	0.540833	-5.05315	4.34587e-07	6.45778e-06	F2rl2
ENSMUSG00000090126	95.6519	-2.72522	0.264368	-10.3084	6.4541e-25	5.58508e-23	NA
ENSMUSG00000092021	3.88907	-2.7215	1.29104	-2.10799	0.0350317	NA	Gbp11
ENSMUSG00000025938	6.43761	-2.72068	0.962119	-2.8278	0.00468697	0.0231765	Slco5a1
ENSMUSG00000043421	287.341	-2.69048	0.185882	-14.4742	1.76443e-47	3.55569e-45	Hilpda
ENSMUSG00000045065	5.03673	-2.68236	1.09383	-2.45225	0.0141965	NA	NA
ENSMUSG00000003541	81.6872	-2.67901	0.294757	-9.08888	1.0006e-19	6.36697e-18	Ier3
ENSMUSG00000118361	3.76911	-2.66867	1.25524	-2.12601	0.033502	NA	NA
ENSMUSG00000018916	34.4808	-2.6542	0.45142	-5.87967	4.11091e-09	8.77731e-08	Csf2
ENSMUSG00000054383	3.75679	-2.6538	1.26301	-2.10116	0.0356265	NA	Pnma1
ENSMUSG00000055541	6.18371	-2.64383	0.963112	-2.74508	0.00604952	0.0282287	Lair1
ENSMUSG00000042826	4.85669	-2.62577	1.08413	-2.422	0.0154354	NA	Fgf11
ENSMUSG00000107742	4.87879	-2.61591	1.10666	-2.36379	0.0180892	NA	NA
ENSMUSG00000024810	25.2933	-2.60342	1.04144	-2.49982	0.0124258	0.0508066	Il33
ENSMUSG00000039114	4343.28	-2.60034	0.274286	-9.48039	2.53336e-21	1.83588e-19	Nrn1
ENSMUSG00000109735	27.3298	-2.58901	0.470734	-5.49995	3.79902e-08	6.84894e-07	NA
ENSMUSG00000118051	184.444	-2.58187	0.213059	-12.1181	8.46843e-34	1.14293e-31	Gm8714
ENSMUSG00000003824	303.604	-2.57718	0.188982	-13.6371	2.40826e-42	4.32047e-40	Syce2
ENSMUSG00000023951	286.349	-2.57356	0.158095	-16.2786	1.40139e-59	3.96459e-57	Vegfa
ENSMUSG00000038264	850.461	-2.57207	0.423256	-6.07686	1.22562e-09	2.85738e-08	Sema7a
ENSMUSG00000005705	4.76822	-2.57059	1.11002	-2.31581	0.0205685	NA	Agrp
ENSMUSG00000056671	600.044	-2.56205	0.124051	-20.6532	9.13614e-95	3.84005e-92	Prelid2
ENSMUSG00000037818	133.904	-2.54953	0.216189	-11.7931	4.23707e-32	5.15137e-30	Abhd18
ENSMUSG00000046314	28.8931	-2.54241	0.469196	-5.41865	6.00494e-08	1.0504e-06	Stxbp6
ENSMUSG00000116398	14.9794	-2.53461	0.632108	-4.00978	6.0776e-05	0.000557057	NA
ENSMUSG00000110774	6.9688	-2.53313	0.927953	-2.72981	0.00633712	0.0292977	NA
ENSMUSG00000002944	20.7143	-2.52811	0.546653	-4.6247	3.75135e-06	4.5573e-05	Cd36
ENSMUSG00000100985	4.6488	-2.52628	1.20441	-2.09752	0.0359479	NA	Gm10640
ENSMUSG00000021573	43.4092	-2.51389	0.362435	-6.93612	4.03023e-12	1.26415e-10	Tppp
ENSMUSG00000110692	6.84542	-2.5124	0.895584	-2.80533	0.00502659	0.0243973	NA
ENSMUSG00000085888	10.2408	-2.50977	0.772731	-3.24793	0.00116249	0.0072158	Gm12224
ENSMUSG00000034829	3.40921	-2.5072	1.2596	-1.99047	0.0465388	NA	Nxnl1
ENSMUSG00000091479	155.141	-2.50266	0.207512	-12.0603	1.7118e-33	2.26868e-31	NA
ENSMUSG00000051331	22.4899	-2.50159	0.523114	-4.78212	1.73459e-06	2.31034e-05	Cacna1c
ENSMUSG00000060128	5.5773	-2.49137	1.06232	-2.34521	0.0190163	NA	Gm2710
ENSMUSG00000067206	65.3413	-2.48616	0.320352	-7.76072	8.44497e-15	3.56994e-13	Lrrc66
ENSMUSG00000079019	13.4129	-2.47788	0.744262	-3.32931	0.000870602	0.00566939	Insl3
ENSMUSG00000027716	8.88057	-2.4733	0.800909	-3.08812	0.00201427	0.0113881	Trpc3
ENSMUSG00000026211	5.452	-2.45955	1.05522	-2.33085	0.0197612	NA	Obsl1
ENSMUSG00000041842	4.41321	-2.45273	1.10885	-2.21195	0.0269701	NA	Fhdc1
ENSMUSG00000082632	11.048	-2.45219	0.720009	-3.40578	0.000659757	0.00447679	NA
ENSMUSG00000025791	1334.38	-2.44789	0.092341	-26.5092	7.59301e-155	6.9813e-152	Pgm1
ENSMUSG00000049804	111.856	-2.44721	0.237664	-10.2969	7.2754e-25	6.22258e-23	Armcx4
ENSMUSG00000063524	36242.7	-2.44455	0.0750412	-32.5761	8.95388e-233	1.64651e-229	Eno1
ENSMUSG00000111229	19.792	-2.44417	0.551102	-4.43506	9.20454e-06	0.000103365	NA
ENSMUSG00000049303	16.285	-2.43731	0.595457	-4.09317	4.2551e-05	0.000406472	Syt12
ENSMUSG00000085585	17.4159	-2.43595	0.589066	-4.13528	3.54516e-05	0.000344396	NA
ENSMUSG00000092257	7.65751	-2.43527	0.852442	-2.85681	0.00427917	0.0215364	Gm2308
ENSMUSG00000006235	9.72646	-2.43461	0.779613	-3.12284	0.00179114	0.0103331	Epor
ENSMUSG00000061878	14.0574	-2.42903	0.633865	-3.8321	0.000127055	0.00106501	Sphk1
ENSMUSG00000027358	13.9959	-2.41666	0.691167	-3.49649	0.000471414	0.0033616	Bmp2
ENSMUSG00000064125	40.975	-2.41273	0.407225	-5.9248	3.12673e-09	6.86527e-08	Prr36
ENSMUSG00000031216	9.62163	-2.40929	0.764961	-3.14956	0.00163519	0.00957231	Stard8
ENSMUSG00000077711	6.45353	-2.40716	0.956668	-2.51619	0.0118631	0.0488981	NA
ENSMUSG00000020641	5.3706	-2.39995	1.04544	-2.29562	0.0216973	NA	Rsad2
ENSMUSG00000114859	7.39071	-2.38892	0.882477	-2.70706	0.00678829	0.0310474	NA
ENSMUSG00000046691	4.25559	-2.38114	1.1541	-2.06321	0.0390929	NA	Chtf8
ENSMUSG00000090619	8.43013	-2.37371	0.856419	-2.77167	0.00557702	0.0264571	Vmn2r60
ENSMUSG00000028645	3325.63	-2.36336	0.0696837	-33.9155	3.93347e-252	8.26646e-249	Slc2a1
ENSMUSG00000085498	5.20851	-2.35912	1.01755	-2.31842	0.0204266	NA	Gm14023
ENSMUSG00000032089	216.177	-2.35895	0.471113	-5.00719	5.523e-07	8.02061e-06	Il10ra
ENSMUSG00000018341	432.504	-2.35327	0.564107	-4.17167	3.02381e-05	0.000298545	Il12rb2
ENSMUSG00000021453	273.097	-2.34977	0.157216	-14.9462	1.64948e-50	3.6766e-48	Gadd45g
ENSMUSG00000052713	234.115	-2.34852	0.166322	-14.1203	2.8459e-45	5.29951e-43	Zfp608
ENSMUSG00000031438	83.5807	-2.33914	0.269859	-8.66802	4.39681e-18	2.43164e-16	Rnf128
ENSMUSG00000070490	8.2424	-2.33704	0.835104	-2.7985	0.00513399	0.0248033	Gm10293
ENSMUSG00000000056	210.56	-2.33595	0.175999	-13.2726	3.34004e-40	5.39949e-38	Narf
ENSMUSG00000018459	21.5436	-2.33488	0.518872	-4.49991	6.79813e-06	7.82083e-05	Slc13a3
ENSMUSG00000118097	15.4575	-2.33376	0.627533	-3.71894	0.000200059	0.00159343	NA
ENSMUSG00000030109	4.06065	-2.33355	1.16592	-2.00147	0.045342	NA	Slc6a12
ENSMUSG00000085505	569.595	-2.33179	0.115304	-20.223	6.1463e-91	2.51162e-88	NA
ENSMUSG00000021200	46.2064	-2.33132	0.367635	-6.34139	2.27701e-10	5.85615e-09	Asb2
ENSMUSG00000114687	39.9644	-2.33125	0.393075	-5.9308	3.01459e-09	6.64882e-08	NA
ENSMUSG00000022197	8.18681	-2.31953	0.820474	-2.82706	0.00469781	0.0232223	Pdzd2
ENSMUSG00000120847	4.06846	-2.31468	1.13644	-2.03678	0.0416724	NA	NA
ENSMUSG00000061718	10.2275	-2.31275	0.767053	-3.01511	0.00256885	0.0140326	Ppp1r1b
ENSMUSG00000059434	5.08519	-2.30779	1.01846	-2.26596	0.0234538	NA	Gckr
ENSMUSG00000032231	1054.99	-2.30531	0.106581	-21.6297	9.43189e-104	4.62508e-101	Anxa2
ENSMUSG00000082330	4.98195	-2.29424	1.09255	-2.0999	0.0357379	NA	NA
ENSMUSG00000020303	155.276	-2.28049	0.552456	-4.12792	3.66064e-05	0.000354754	Stc2
ENSMUSG00000000530	67.7127	-2.27626	0.297572	-7.64945	2.01841e-14	8.22514e-13	Acvrl1
ENSMUSG00000020102	5.9065	-2.26518	0.952541	-2.37804	0.0174051	0.0662069	Slc16a7
ENSMUSG00000112120	11.7347	-2.25313	0.680005	-3.3134	0.000921706	0.00594703	NA
ENSMUSG00000037411	108.59	-2.23481	0.227147	-9.83861	7.67668e-23	5.97522e-21	Serpine1
ENSMUSG00000024665	295.436	-2.2331	0.188521	-11.8454	2.27362e-32	2.83451e-30	Fads2
ENSMUSG00000049493	11.4866	-2.22394	0.701542	-3.17007	0.001524	0.00903651	Pls1
ENSMUSG00000037280	1270.36	-2.21922	0.0861957	-25.7463	3.54974e-146	2.48668e-143	Galnt6
ENSMUSG00000019944	13.3954	-2.21799	0.641582	-3.45707	0.000546089	0.00379835	Rhobtb1
ENSMUSG00000032041	21.034	-2.21287	0.515124	-4.2958	1.74067e-05	0.000181353	Tirap
ENSMUSG00000036661	31.6985	-2.21138	0.424201	-5.21305	1.85763e-07	2.99317e-06	Dennd3
ENSMUSG00000071343	15.2673	-2.20235	0.607593	-3.62471	0.000289282	0.00220241	Gm10327
ENSMUSG00000022754	17.217	-2.2009	0.562168	-3.91503	9.03923e-05	0.000786841	Tmem45a
ENSMUSG00000020333	30.0066	-2.17255	0.435558	-4.98797	6.10179e-07	8.76595e-06	Acsl6
ENSMUSG00000021420	2207.2	-2.17107	0.117427	-18.4887	2.54509e-76	9.6002e-74	Fars2
ENSMUSG00000097148	9.35688	-2.16844	0.760388	-2.85175	0.0043479	0.0218077	NA
ENSMUSG00000038151	14.0228	-2.16566	0.622115	-3.48112	0.000499321	0.00352641	Prdm1
ENSMUSG00000096948	12.0694	-2.16475	0.668393	-3.23873	0.00120062	0.00739666	Gm4221
ENSMUSG00000017314	253.504	-2.16006	0.16114	-13.4048	5.66593e-41	9.52303e-39	Mpp2
ENSMUSG00000022885	1616.4	-2.15519	0.262922	-8.19706	2.46339e-16	1.19207e-14	St6gal1
ENSMUSG00000055313	23.2029	-2.15459	0.486373	-4.42991	9.42709e-06	0.000105622	Pgbd1
ENSMUSG00000044628	7.28452	-2.14511	0.880945	-2.43501	0.0148916	0.0587477	Rnf208
ENSMUSG00000038517	514.191	-2.13776	0.706042	-3.0278	0.00246337	0.0135674	Tbkbp1
ENSMUSG00000090062	406.048	-2.11605	0.127518	-16.5941	7.68303e-62	2.40479e-59	NA
ENSMUSG00000064193	302.515	-2.11449	0.170115	-12.4298	1.80125e-35	2.57264e-33	NA
ENSMUSG00000006403	13.6357	-2.11223	0.677846	-3.1161	0.00183261	0.010531	Adamts4
ENSMUSG00000023266	8.02954	-2.10718	0.856389	-2.46053	0.013873	0.0555034	Frs3
ENSMUSG00000054074	6.31827	-2.10021	0.905837	-2.31853	0.0204207	0.0747032	Skida1
ENSMUSG00000112907	35.1364	-2.09897	0.405616	-5.17477	2.28192e-07	3.60573e-06	NA
ENSMUSG00000104156	6.28673	-2.09632	0.924513	-2.26749	0.0233606	0.0828011	NA
ENSMUSG00000028978	8.95644	-2.09113	0.747271	-2.79835	0.00513638	0.0248067	Nos3
ENSMUSG00000109695	6.275	-2.09102	0.947932	-2.20587	0.0273928	0.0933031	Gm31166
ENSMUSG00000030695	21572.6	-2.08891	0.0753737	-27.714	4.7383e-169	5.36194e-166	Aldoa
ENSMUSG00000058966	3909.25	-2.08312	0.0770607	-27.0321	6.19555e-161	6.07618e-158	Tlcd3b
ENSMUSG00000062785	19.6438	-2.08274	0.527917	-3.9452	7.97335e-05	0.000705752	Kcnc3
ENSMUSG00000039676	88.9384	-2.07598	0.25986	-7.98884	1.36218e-15	6.18489e-14	Capsl
ENSMUSG00000073198	17.7622	-2.07589	0.572788	-3.62419	0.000289864	0.00220406	Bnip3l-ps
ENSMUSG00000006494	1325.23	-2.07478	0.0838568	-24.7419	3.78804e-135	2.32191e-132	Pdk1
ENSMUSG00000020401	557.347	-2.07203	0.375848	-5.51296	3.52852e-08	6.40841e-07	Garin3
ENSMUSG00000041216	6.20516	-2.06846	0.908152	-2.27766	0.0227466	0.080984	Clvs1
ENSMUSG00000085396	10.5844	-2.06511	0.726195	-2.84374	0.00445877	0.0222575	Firre
ENSMUSG00000105558	59.6909	-2.05562	0.302705	-6.79085	1.11475e-11	3.30627e-10	NA
ENSMUSG00000100794	14.8921	-2.05475	0.612649	-3.35388	0.000796878	0.00525925	NA
ENSMUSG00000020828	20.1017	-2.05471	0.513154	-4.00408	6.22591e-05	0.00056886	Pld2
ENSMUSG00000032392	60.2565	-2.05218	0.304406	-6.74159	1.56662e-11	4.57274e-10	Parp16
ENSMUSG00000005447	160.121	-2.05067	0.194344	-10.5517	4.98694e-26	4.52857e-24	Pafah1b3
ENSMUSG00000041957	23.499	-2.04715	0.488041	-4.19463	2.7332e-05	0.000270762	Pkp2
ENSMUSG00000062127	21.8376	-2.04572	0.553892	-3.69335	0.000221321	0.00174389	Cttnbp2nl
ENSMUSG00000078300	7.88313	-2.04417	0.80546	-2.53789	0.0111522	0.0465816	Gm2606
ENSMUSG00000009418	40.73	-2.03547	0.356703	-5.70634	1.15431e-08	2.26113e-07	Nav1
ENSMUSG00000104913	406.08	-2.0287	0.140839	-14.4044	4.85378e-47	9.52053e-45	NA
ENSMUSG00000061086	13.8706	-2.01428	0.691963	-2.91097	0.00360306	0.0186933	Myl4
ENSMUSG00000079018	65.7377	-2.00766	0.664828	-3.01981	0.0025293	0.0138624	Ly6c1
ENSMUSG00000021831	2338.37	-2.00155	0.0764159	-26.1929	3.20484e-151	2.61925e-148	Ero1a
ENSMUSG00000085213	10.1365	-1.99881	0.717967	-2.78399	0.00536945	0.0257045	NA
ENSMUSG00000030247	73.2134	-1.99598	0.276703	-7.21343	5.4561e-13	1.89303e-11	Kcnj8
ENSMUSG00000005640	5.86603	-1.99583	0.961214	-2.07637	0.0378601	0.11911	Insrr
ENSMUSG00000038143	24.6528	-1.99229	0.528448	-3.77008	0.000163196	0.00133748	Stox2
ENSMUSG00000028545	21.9078	-1.99022	0.499407	-3.98517	6.7432e-05	0.000608958	Bend5
ENSMUSG00000000628	2515.3	-1.98153	0.0762326	-25.9932	5.9132e-149	4.34945e-146	Hk2
ENSMUSG00000024968	18.45	-1.96164	0.59174	-3.31504	0.000916291	0.00592508	Rcor2
ENSMUSG00000114241	11.6331	-1.95998	0.656907	-2.98365	0.00284836	0.0152984	Gm30108
ENSMUSG00000024936	18.3645	-1.95965	0.623165	-3.14467	0.00166275	0.00968741	Kcnk7
ENSMUSG00000025203	8246.11	-1.95963	0.188941	-10.3717	3.33648e-25	2.9391e-23	Scd2
ENSMUSG00000053846	239.455	-1.95905	0.169083	-11.5863	4.83412e-31	5.55584e-29	Lipg
ENSMUSG00000111336	8.2773	-1.95758	0.850662	-2.30124	0.0213781	0.0772711	NA
ENSMUSG00000055069	8.16444	-1.95588	0.8888	-2.20059	0.0277652	0.0942441	Rab39
ENSMUSG00000020961	28.1054	-1.95577	0.462649	-4.22733	2.36476e-05	0.000238928	Ston2
ENSMUSG00000001247	11.5818	-1.94785	0.656288	-2.96799	0.00299759	0.0160063	Lsr
ENSMUSG00000031609	539.032	-1.94304	0.114002	-17.044	3.87268e-65	1.32491e-62	Sap30
ENSMUSG00000019916	1868.35	-1.94201	0.0779814	-24.9035	6.81808e-137	4.3609e-134	P4ha1
ENSMUSG00000050222	18.9337	-1.94188	0.550485	-3.52759	0.00041936	0.00303903	Il17d
ENSMUSG00000083836	62.6604	-1.94038	0.298859	-6.49262	8.43573e-11	2.2687e-09	NA
ENSMUSG00000020614	26.3871	-1.93825	0.440009	-4.40502	1.05776e-05	0.000116647	Fam20a
ENSMUSG00000004952	37.7981	-1.93811	0.383023	-5.06002	4.19211e-07	6.24823e-06	Rasa4
ENSMUSG00000038295	91.2879	-1.93633	0.241182	-8.02851	9.86629e-16	4.50755e-14	Atg9b
ENSMUSG00000046031	223.169	-1.93504	0.165741	-11.6751	1.70891e-31	2.0274e-29	Calhm6
ENSMUSG00000022639	152.098	-1.93441	0.220749	-8.76296	1.90195e-18	1.07614e-16	NA
ENSMUSG00000033316	35.0035	-1.93066	0.410494	-4.70326	2.56039e-06	3.23869e-05	Galnt9
ENSMUSG00000096917	370.957	-1.92864	0.144793	-13.32	1.77071e-40	2.89433e-38	2500002B13Rik
ENSMUSG00000032294	34308.7	-1.92851	0.0665934	-28.9595	2.12771e-184	2.84552e-181	Pkm
ENSMUSG00000064247	246.678	-1.92391	0.165608	-11.6172	3.36921e-31	3.93368e-29	Plcxd1
ENSMUSG00000002228	68.8784	-1.91105	0.288551	-6.62292	3.52177e-11	9.81228e-10	Ppm1j
ENSMUSG00000098156	20.9661	-1.90963	0.494167	-3.86435	0.000111384	0.0009477	NA
ENSMUSG00000070601	8.08602	-1.90959	0.829145	-2.30309	0.021274	0.0770084	Vmn2r84
ENSMUSG00000017009	107.4	-1.90836	0.237109	-8.04845	8.38508e-16	3.85478e-14	Sdc4
ENSMUSG00000031342	250.991	-1.90698	0.348776	-5.46765	4.56045e-08	8.1123e-07	Gpm6b
ENSMUSG00000038059	67.6772	-1.9051	0.279833	-6.80798	9.89782e-12	2.94751e-10	Smim3
ENSMUSG00000027078	155.7	-1.9018	0.189775	-10.0214	1.22813e-23	9.8727e-22	Ube2l6
ENSMUSG00000059040	191.824	-1.8987	0.216732	-8.76059	1.94239e-18	1.09481e-16	Eno1b
ENSMUSG00000062070	27493	-1.89619	0.0648364	-29.2458	5.08186e-188	7.47592e-185	Pgk1
ENSMUSG00000022051	1623.03	-1.88703	0.0830284	-22.7276	2.39144e-114	1.30298e-111	Bnip3l
ENSMUSG00000024066	268.467	-1.88406	0.166885	-11.2896	1.47752e-29	1.58655e-27	Xdh
ENSMUSG00000111013	6.34928	-1.88187	0.887245	-2.12103	0.0339194	0.109427	NA
ENSMUSG00000028207	42.8119	-1.88166	0.359716	-5.23097	1.68624e-07	2.73196e-06	Asph
ENSMUSG00000004151	36.8273	-1.88158	0.42901	-4.38587	1.15523e-05	0.000126073	Etv1
ENSMUSG00000059343	24.6076	-1.87996	0.455638	-4.12599	3.69139e-05	0.000357264	Aldoart1
ENSMUSG00000081373	7.91937	-1.87783	0.789471	-2.37859	0.0173788	0.0661474	NA
ENSMUSG00000033460	8.71809	-1.87657	0.764644	-2.45417	0.014121	0.0562964	Armcx1
ENSMUSG00000098006	11.0964	-1.87261	0.665229	-2.81499	0.00487787	0.0239194	Gm8565
ENSMUSG00000028128	40.46	-1.87167	0.366929	-5.1009	3.3805e-07	5.12158e-06	F3
ENSMUSG00000112546	76.6459	-1.87085	0.27076	-6.90963	4.85914e-12	1.49859e-10	NA
ENSMUSG00000044005	196.677	-1.86457	0.173225	-10.7639	5.09832e-27	4.8388e-25	Gls2
ENSMUSG00000021214	188.126	-1.86436	0.205339	-9.07945	1.09127e-19	6.86055e-18	Akr1c18
ENSMUSG00000024892	489.814	-1.85961	0.124267	-14.9647	1.24872e-50	2.82614e-48	Pcx
ENSMUSG00000001670	54.6612	-1.84997	0.685937	-2.69701	0.00699662	0.0317775	Tat
ENSMUSG00000097277	10.8467	-1.83048	0.686689	-2.66566	0.00768372	0.0343572	2900076A07Rik
ENSMUSG00000086241	178.733	-1.8169	0.186828	-9.72498	2.35962e-22	1.7893e-20	4930483K19Rik
ENSMUSG00000075511	41.2842	-1.80969	0.379307	-4.77105	1.83265e-06	2.41795e-05	NA
ENSMUSG00000087396	8.41329	-1.80957	0.778461	-2.32455	0.0200959	0.0738227	4933407K13Rik
ENSMUSG00000006930	6.91203	-1.80746	0.847574	-2.13251	0.0329652	0.107219	Hap1
ENSMUSG00000026199	146.422	-1.80603	0.196521	-9.19	3.92823e-20	2.61485e-18	Ankzf1
ENSMUSG00000024548	144.196	-1.80445	0.214318	-8.41951	3.78058e-17	1.96524e-15	Setbp1
ENSMUSG00000027333	317.653	-1.79906	0.161566	-11.1352	8.45967e-29	8.7641e-27	Smox
ENSMUSG00000038412	1151.97	-1.78782	0.097916	-18.2587	1.76433e-74	6.48876e-72	Higd1a
ENSMUSG00000090024	34.8587	-1.78769	0.379758	-4.70745	2.5084e-06	3.17838e-05	NA
ENSMUSG00000055194	34.7829	-1.78442	0.376207	-4.7432	2.10371e-06	2.74358e-05	Actbl2
ENSMUSG00000087185	10.5372	-1.78438	0.677919	-2.63214	0.00848481	0.0372042	Gm13872
ENSMUSG00000011752	4555.11	-1.78394	0.0630217	-28.3067	2.85661e-176	3.50197e-173	Pgam1
ENSMUSG00000030638	32.5183	-1.77926	0.403403	-4.41062	1.03075e-05	0.000113839	Sh3gl3
ENSMUSG00000082424	112.153	-1.77006	0.241377	-7.33316	2.24783e-13	8.26695e-12	Gm13292
ENSMUSG00000026950	15.6605	-1.76714	0.609116	-2.90116	0.00371782	0.019177	Neb
ENSMUSG00000018909	507.999	-1.75867	0.131026	-13.4223	4.47779e-41	7.74973e-39	Arrb1
ENSMUSG00000111856	101.921	-1.75825	0.239653	-7.33663	2.19038e-13	8.09615e-12	NA
ENSMUSG00000037661	20.9533	-1.75813	0.500324	-3.51397	0.000441458	0.00318129	Gpr160
ENSMUSG00000103622	28.1619	-1.75397	0.437242	-4.01144	6.03495e-05	0.000553492	B430319G15Rik
ENSMUSG00000032011	1333.46	-1.7506	0.116966	-14.9668	1.21015e-50	2.78165e-48	Thy1
ENSMUSG00000056978	15.0373	-1.7505	0.646965	-2.70571	0.00681581	0.0311196	Hamp2
ENSMUSG00000040703	16.2907	-1.75034	0.604066	-2.89759	0.00376039	0.0193423	Cyp2s1
ENSMUSG00000012819	212.763	-1.7475	0.197645	-8.84162	9.43383e-19	5.52913e-17	Cdh23
ENSMUSG00000041115	96.2203	-1.74646	0.240863	-7.25084	4.1418e-13	1.46819e-11	Iqsec2
ENSMUSG00000036427	12898.9	-1.74525	0.0753955	-23.1479	1.52606e-118	8.63457e-116	Gpi1
ENSMUSG00000098019	18.4878	-1.73863	0.512647	-3.39148	0.000695174	0.004689	Gm2546
ENSMUSG00000063229	37702.7	-1.73734	0.0738929	-23.5116	3.10254e-122	1.82566e-119	Ldha
ENSMUSG00000078965	15.4074	-1.7373	0.577852	-3.00647	0.002643	0.0143685	Gm12033
ENSMUSG00000089726	61.17	-1.73106	0.296479	-5.83873	5.26005e-09	1.10427e-07	NA
ENSMUSG00000063275	36.4857	-1.7295	0.38108	-4.53841	5.66787e-06	6.59131e-05	Hacd1
ENSMUSG00000032114	206.312	-1.71962	0.178432	-9.6374	5.55799e-22	4.12947e-20	Slc37a4
ENSMUSG00000015766	11.6994	-1.71863	0.649691	-2.6453	0.0081618	0.0361216	Eps8
ENSMUSG00000021338	107.08	-1.71173	0.221577	-7.72522	1.11663e-14	4.69335e-13	Carmil1
ENSMUSG00000042766	39.7041	-1.70024	0.354613	-4.79463	1.62977e-06	2.1796e-05	Trim46
ENSMUSG00000046618	17.353	-1.69819	0.52434	-3.23872	0.00120068	0.00739666	Olfml2a
ENSMUSG00000095123	19.5564	-1.69638	0.504934	-3.35961	0.000780537	0.00517229	NA
ENSMUSG00000031024	47.6498	-1.69556	0.318964	-5.31582	1.06175e-07	1.7815e-06	Dennd2b
ENSMUSG00000023571	91.6147	-1.69529	0.237078	-7.15077	8.6293e-13	2.9116e-11	C1qtnf12
ENSMUSG00000082314	105.403	-1.68794	0.233785	-7.22003	5.19767e-13	1.81622e-11	Gm13296
ENSMUSG00000029217	57.9354	-1.68236	0.296415	-5.67569	1.38133e-08	2.68178e-07	Tec
ENSMUSG00000111079	70.7095	-1.68189	0.272335	-6.1758	6.58298e-10	1.58758e-08	Gm47112
ENSMUSG00000114737	11.3951	-1.68031	0.642341	-2.61592	0.00889876	0.0387307	NA
ENSMUSG00000031987	2205.94	-1.67387	0.0777174	-21.5379	6.87911e-103	3.26447e-100	Egln1
ENSMUSG00000090958	55.0353	-1.67118	0.323719	-5.16243	2.43763e-07	3.83839e-06	Lrrc32
ENSMUSG00000049285	11.3383	-1.67117	0.669583	-2.49584	0.0125658	0.0512206	Mblac1
ENSMUSG00000083761	13.5585	-1.66698	0.632835	-2.63414	0.00843509	0.0370635	NA
ENSMUSG00000067818	7.80842	-1.66302	0.78961	-2.10613	0.0351929	0.112562	Myl9
ENSMUSG00000003955	2134.51	-1.66182	0.0788042	-21.088	1.02585e-98	4.43863e-96	Fam162a
ENSMUSG00000082016	55.8121	-1.66113	0.322807	-5.1459	2.66239e-07	4.12962e-06	NA
ENSMUSG00000117359	38.7924	-1.65691	0.361167	-4.58765	4.48267e-06	5.34944e-05	NA
ENSMUSG00000005089	45.0429	-1.64891	0.345352	-4.77459	1.80074e-06	2.38441e-05	Slc1a2
ENSMUSG00000015437	843.456	-1.64836	0.389322	-4.23392	2.29651e-05	0.000233476	Gzmb
ENSMUSG00000096617	44.2281	-1.6458	0.390669	-4.21276	2.52269e-05	0.000252032	NA
ENSMUSG00000120697	39.1998	-1.64568	0.366127	-4.49484	6.96225e-06	7.99545e-05	NA
ENSMUSG00000035637	413.312	-1.63852	0.138305	-11.8472	2.22563e-32	2.79839e-30	Grhpr
ENSMUSG00000038936	21.6475	-1.63403	0.494648	-3.30342	0.000955123	0.00611703	Sccpdh
ENSMUSG00000047963	35.5153	-1.63001	0.420798	-3.87361	0.000107233	0.00091751	Stbd1
ENSMUSG00000057037	9.01628	-1.6208	0.743383	-2.1803	0.0292356	0.0980847	Cfhr1
ENSMUSG00000026072	15.2419	-1.61797	0.6194	-2.61216	0.00899717	0.0391012	Il1r1
ENSMUSG00000033847	8.99837	-1.61698	0.716971	-2.2553	0.0241147	0.0848686	Pla2g4c
ENSMUSG00000022912	600.375	-1.61696	0.294987	-5.48147	4.21797e-08	7.54873e-07	Pros1
ENSMUSG00000024201	457.348	-1.61602	0.121231	-13.3301	1.54729e-40	2.55754e-38	Kdm4b
ENSMUSG00000092274	82.6793	-1.6151	0.273991	-5.89471	3.75336e-09	8.10802e-08	Neat1
ENSMUSG00000045031	111.306	-1.61464	0.212023	-7.61538	2.62908e-14	1.06546e-12	Cetn4
ENSMUSG00000025545	81.734	-1.61398	0.267389	-6.03607	1.57913e-09	3.64686e-08	Clybl
ENSMUSG00000036019	42.6609	-1.6108	0.344311	-4.67833	2.8922e-06	3.60875e-05	Tmtc2
ENSMUSG00000078922	576.888	-1.60256	0.122337	-13.0995	3.31219e-39	5.12901e-37	Tgtp1
ENSMUSG00000080982	22.6691	-1.60162	0.483021	-3.31584	0.000913682	0.00591081	NA
ENSMUSG00000027360	85.6622	-1.60077	0.246453	-6.49523	8.29046e-11	2.23372e-09	Hdc
ENSMUSG00000085148	10.8803	-1.59986	0.67979	-2.35346	0.0185996	0.0695524	Mir22hg
ENSMUSG00000057666	46286.6	-1.58973	0.0719202	-22.1041	2.88911e-108	1.46558e-105	Gapdh
ENSMUSG00000079227	66.7858	-1.5872	0.696974	-2.27727	0.0227698	0.0810274	Ccr5
ENSMUSG00000056749	204.993	-1.58347	0.175364	-9.02959	1.72317e-19	1.06511e-17	Nfil3
ENSMUSG00000071068	592.182	-1.57962	0.116596	-13.5478	8.16543e-42	1.43002e-39	Treml2
ENSMUSG00000037071	462.021	-1.57102	0.640344	-2.45339	0.0141515	0.0563876	Scd1
ENSMUSG00000004558	361.519	-1.57094	0.152081	-10.3296	5.17745e-25	4.50683e-23	Ndrg2
ENSMUSG00000024402	2272.97	-1.56344	0.259681	-6.02061	1.73756e-09	3.96915e-08	Lta
ENSMUSG00000001348	301.155	-1.56343	0.141728	-11.0312	2.70137e-28	2.72191e-26	Acp5
ENSMUSG00000110317	8.04995	-1.56297	0.769049	-2.03234	0.0421188	0.129274	NA
ENSMUSG00000103039	9.41923	-1.55848	0.726759	-2.14443	0.0319986	0.10484	NA
ENSMUSG00000103175	30.904	-1.55697	0.415198	-3.74994	0.000176876	0.00143205	NA
ENSMUSG00000030032	20.7274	-1.55581	0.471436	-3.30014	0.000966356	0.00618089	Wdr54
ENSMUSG00000014776	22.0303	-1.55027	0.495895	-3.1262	0.00177081	0.0102319	Nol3
ENSMUSG00000021796	225.685	-1.54803	0.165804	-9.33651	9.95633e-21	6.97699e-19	Bmpr1a
ENSMUSG00000022574	8.71304	-1.54788	0.727128	-2.12877	0.0332736	0.107888	Naprt
ENSMUSG00000034201	101.227	-1.54585	0.248171	-6.22898	4.69473e-10	1.15492e-08	Gas2l1
ENSMUSG00000086049	8.65575	-1.54469	0.728117	-2.12149	0.0338806	0.109374	NA
ENSMUSG00000033105	1270.27	-1.54325	0.100933	-15.2898	8.93709e-53	2.1553e-50	Lss
ENSMUSG00000032845	51.9544	-1.54209	0.324682	-4.74955	2.03865e-06	2.66583e-05	Alpk2
ENSMUSG00000026358	1084.49	-1.54146	0.12946	-11.9068	1.09036e-32	1.4195e-30	Rgs1
ENSMUSG00000036570	9.94262	-1.54069	0.692606	-2.22449	0.0261156	0.0902694	Fxyd1
ENSMUSG00000043773	8.56027	-1.53807	0.767661	-2.00358	0.0451155	0.136562	1700048O20Rik
ENSMUSG00000115505	44.5284	-1.53588	0.33232	-4.62167	3.80658e-06	4.60894e-05	NA
ENSMUSG00000104101	14.597	-1.53013	0.566069	-2.70309	0.0068699	0.0312792	NA
ENSMUSG00000084215	30.3908	-1.52769	0.396328	-3.8546	0.000115918	0.000981167	NA
ENSMUSG00000030208	82.6776	-1.52541	0.274813	-5.55072	2.84489e-08	5.28424e-07	Emp1
ENSMUSG00000024486	109.87	-1.52295	0.275753	-5.52289	3.33477e-08	6.09413e-07	Hbegf
ENSMUSG00000014837	32.8368	-1.52295	0.380958	-3.99768	6.39669e-05	0.000581234	Matcap1
ENSMUSG00000040328	31.56	-1.52273	0.40436	-3.76578	0.000166029	0.00135767	Or2v1
ENSMUSG00000032374	221.965	-1.52193	0.172915	-8.80159	1.34892e-18	7.72138e-17	Plod2
ENSMUSG00000007033	11.726	-1.51625	0.642501	-2.35992	0.0182789	0.0687024	Hspa1l
ENSMUSG00000104360	8.47108	-1.5116	0.736069	-2.05362	0.040013	0.124236	NA
ENSMUSG00000098482	15.6629	-1.51085	0.609464	-2.47899	0.0131755	0.0533073	Mir6363
ENSMUSG00000022178	151.811	-1.50587	0.731677	-2.0581	0.0395803	0.123251	Ajuba
ENSMUSG00000097503	12.2963	-1.49926	0.625507	-2.39687	0.0165358	0.0636301	3110045C21Rik
ENSMUSG00000028549	480.299	-1.4975	0.116095	-12.8989	4.56611e-38	6.92495e-36	Itgb3bp
ENSMUSG00000006651	24.0296	-1.49586	0.436994	-3.42306	0.000619212	0.00424475	Aplp1
ENSMUSG00000019734	27.8568	-1.49541	0.415146	-3.60212	0.000315628	0.00237747	Tmc4
ENSMUSG00000104350	25.2175	-1.49386	0.450199	-3.31822	0.000905919	0.00586593	NA
ENSMUSG00000050953	55.8034	-1.49214	0.296692	-5.02926	4.92374e-07	7.23608e-06	Gja1
ENSMUSG00000094808	43.4537	-1.48632	0.376089	-3.95205	7.74853e-05	0.000688753	1810009J06Rik
ENSMUSG00000030598	95.1567	-1.48559	0.228659	-6.49695	8.19638e-11	2.21242e-09	Fbxo17
ENSMUSG00000082292	621.99	-1.48502	0.130519	-11.3778	5.39415e-30	5.87803e-28	NA
ENSMUSG00000026773	1273.15	-1.48239	0.0877872	-16.8861	5.69037e-64	1.87705e-61	Pfkfb3
ENSMUSG00000097989	10.9616	-1.48147	0.640005	-2.31479	0.0206247	0.0752137	Gm4335
ENSMUSG00000032446	46.2658	-1.47557	0.345988	-4.26481	2.00074e-05	0.000206401	Eomes
ENSMUSG00000033565	39.0398	-1.47156	0.35575	-4.13649	3.52652e-05	0.000342886	Rbfox2
ENSMUSG00000046410	24.8315	-1.47081	0.464988	-3.16311	0.00156096	0.0092074	Kcnk6
ENSMUSG00000020702	41.3685	-1.46966	0.426582	-3.4452	0.000570633	0.00394112	Ccl1
ENSMUSG00000020766	1908.98	-1.46535	0.10164	-14.417	4.04335e-47	8.03807e-45	Galk1
ENSMUSG00000040734	118.756	-1.46495	0.210142	-6.97122	3.14199e-12	1.00701e-10	Ppp1r13l
ENSMUSG00000025969	40.4391	-1.46004	0.369265	-3.95391	7.6883e-05	0.000684226	Nrp2
ENSMUSG00000050538	17.7899	-1.45914	0.520208	-2.80491	0.00503303	0.0244198	NA
ENSMUSG00000037010	20.3189	-1.45452	0.494405	-2.94195	0.00326152	0.0171726	Apln
ENSMUSG00000032310	41.168	-1.45412	0.395326	-3.67828	0.00023481	0.00184033	Cyp1a2
ENSMUSG00000034799	262.715	-1.45361	0.147296	-9.86861	5.69476e-23	4.47998e-21	Unc13a
ENSMUSG00000041220	370.967	-1.45209	0.12894	-11.2617	2.02746e-29	2.1613e-27	Elovl6
ENSMUSG00000021196	7849.17	-1.44946	0.236571	-6.12696	8.95712e-10	2.11506e-08	Pfkp
ENSMUSG00000027199	18.9311	-1.44292	0.513111	-2.8121	0.00492198	0.0240796	Gatm
ENSMUSG00000023243	305.516	-1.43515	0.148476	-9.66592	4.20841e-22	3.15867e-20	Kcnk5
ENSMUSG00000053113	164.658	-1.43225	0.186119	-7.69536	1.411e-14	5.91374e-13	Socs3
ENSMUSG00000037405	520.218	-1.42998	0.133951	-10.6754	1.32631e-26	1.23539e-24	Icam1
ENSMUSG00000029275	519.223	-1.42732	0.127413	-11.2023	3.97146e-29	4.17315e-27	Gfi1
ENSMUSG00000078921	600.851	-1.42201	0.127898	-11.1183	1.02166e-28	1.05102e-26	Tgtp2
ENSMUSG00000022146	22.4689	-1.42116	0.482272	-2.94681	0.00321073	0.0169842	Osmr
ENSMUSG00000103313	9.91036	-1.42103	0.724873	-1.96039	0.0499503	0.147613	NA
ENSMUSG00000098123	38.179	-1.42	0.390047	-3.6406	0.000272007	0.00208846	NA
ENSMUSG00000020027	1330.95	-1.41788	0.107358	-13.2071	7.98669e-40	1.24992e-37	Socs2
ENSMUSG00000033578	34.3218	-1.4174	0.390485	-3.62985	0.000283591	0.00216498	Tmem35a
ENSMUSG00000015647	22.3662	-1.41472	0.457361	-3.09322	0.00197998	0.0112288	Lama5
ENSMUSG00000046157	877.836	-1.41323	0.0945731	-14.9433	1.72356e-50	3.78437e-48	Tmem229b
ENSMUSG00000032064	15.5577	-1.41273	0.545418	-2.59017	0.00959272	0.0411784	Dixdc1
ENSMUSG00000066632	61.069	-1.41118	0.302327	-4.66772	3.04562e-06	3.78094e-05	NA
ENSMUSG00000090030	62.1433	-1.4091	0.274869	-5.12644	2.95267e-07	4.52938e-06	NA
ENSMUSG00000093483	14.8948	-1.4084	0.548319	-2.56857	0.0102119	0.0433232	AA465934
ENSMUSG00000047344	196.735	-1.4077	0.199157	-7.06831	1.56826e-12	5.18443e-11	Lancl3
ENSMUSG00000046223	17.4024	-1.40764	0.509811	-2.7611	0.00576063	0.0271183	Plaur
ENSMUSG00000038179	465.753	-1.40405	0.130232	-10.7812	4.22308e-27	4.03414e-25	Slamf7
ENSMUSG00000057329	1684.73	-1.40103	0.113793	-12.3121	7.7984e-35	1.07217e-32	Bcl2
ENSMUSG00000019889	33.3095	-1.39981	0.373697	-3.74583	0.000179799	0.00145251	Ptprk
ENSMUSG00000007817	1763.37	-1.39762	0.0883677	-15.816	2.41335e-56	6.12118e-54	Zmiz1
ENSMUSG00000053470	828.358	-1.39046	0.0978055	-14.2166	7.22736e-46	1.3808e-43	Kdm3a
ENSMUSG00000020572	3183.54	-1.38844	0.0687674	-20.1904	1.18925e-90	4.7284e-88	Nampt
ENSMUSG00000022707	217.322	-1.38541	0.161523	-8.57715	9.72556e-18	5.29899e-16	Gbe1
ENSMUSG00000037012	4955.27	-1.38345	0.0654604	-21.1342	3.85769e-99	1.71971e-96	Hk1
ENSMUSG00000046532	139.037	-1.38083	0.202013	-6.83537	8.17956e-12	2.46577e-10	Ar
ENSMUSG00000024014	2085.21	-1.37614	0.093793	-14.6722	9.72068e-49	2.0141e-46	Pim1
ENSMUSG00000078650	15.9453	-1.37595	0.597528	-2.30273	0.021294	0.0770618	G6pc
ENSMUSG00000097125	692.597	-1.37484	0.120493	-11.4101	3.72139e-30	4.1162e-28	NA
ENSMUSG00000056962	1066.31	-1.3747	0.0892189	-15.4081	1.44323e-53	3.53856e-51	Jmjd6
ENSMUSG00000022865	16.4225	-1.3719	0.544057	-2.52161	0.011682	0.0483416	Cxadr
ENSMUSG00000044197	161.65	-1.37181	0.178813	-7.67177	1.69639e-14	7.02976e-13	Gpr146
ENSMUSG00000025986	876.21	-1.36425	0.090827	-15.0203	5.40293e-51	1.26163e-48	Slc39a10
ENSMUSG00000055320	129.882	-1.36242	0.217228	-6.27182	3.56856e-10	8.92807e-09	Tead1
ENSMUSG00000110569	18.3063	-1.36214	0.515398	-2.6429	0.00822001	0.0363137	NA
ENSMUSG00000020131	42.3809	-1.36098	0.332069	-4.09849	4.15852e-05	0.000398762	Pcsk4
ENSMUSG00000120539	10.9994	-1.35989	0.660299	-2.05951	0.0394456	0.122968	NA
ENSMUSG00000001444	1543.67	-1.35767	0.368052	-3.68879	0.000225324	0.00177164	Tbx21
ENSMUSG00000053931	1840.14	-1.35751	0.0748316	-18.1408	1.51729e-73	5.44411e-71	Cnn3
ENSMUSG00000089781	13.3262	-1.35575	0.647774	-2.09294	0.0363543	0.115559	Gm15756
ENSMUSG00000110790	107.497	-1.35139	0.217454	-6.21461	5.14532e-10	1.25527e-08	NA
ENSMUSG00000073555	93.3025	-1.35105	0.270703	-4.99088	6.01036e-07	8.65151e-06	Gm4951
ENSMUSG00000102602	19.8791	-1.35043	0.483723	-2.79173	0.00524269	0.0252208	NA
ENSMUSG00000042622	166.25	-1.35038	0.194191	-6.95388	3.55374e-12	1.12914e-10	Maff
ENSMUSG00000061099	13.3126	-1.3503	0.582092	-2.31975	0.0203547	0.0745392	Gapdhs
ENSMUSG00000026872	80.7023	-1.35015	0.2571	-5.25145	1.5091e-07	2.46945e-06	Zeb2
ENSMUSG00000020812	42.658	-1.34503	0.335639	-4.00738	6.13967e-05	0.000562395	Snhg16
ENSMUSG00000030352	31.0536	-1.34095	0.423388	-3.1672	0.00153915	0.00911164	Tspan9
ENSMUSG00000069094	1821.8	-1.34089	0.0816179	-16.4289	1.18848e-60	3.49676e-58	Pde7a
ENSMUSG00000034379	385.005	-1.33979	0.168193	-7.96576	1.64209e-15	7.36485e-14	Wdr5b
ENSMUSG00000045039	34.6793	-1.33595	0.387274	-3.44963	0.000561352	0.00388432	Megf8
ENSMUSG00000028655	150.942	-1.33544	0.193602	-6.89782	5.2805e-12	1.61836e-10	Mfsd2a
ENSMUSG00000106574	12.5942	-1.32807	0.625716	-2.12247	0.033798	0.109189	Gm2451
ENSMUSG00000052504	25.6859	-1.32742	0.45891	-2.89256	0.00382115	0.0196069	Epha3
ENSMUSG00000025025	268.695	-1.32738	0.147402	-9.00519	2.15286e-19	1.31961e-17	Mxi1
ENSMUSG00000003123	168.772	-1.3253	0.194412	-6.81695	9.29925e-12	2.78051e-10	Lipe
ENSMUSG00000105813	537.351	-1.3175	0.106194	-12.4066	2.40732e-35	3.37276e-33	NA
ENSMUSG00000025790	632.63	-1.31623	0.132499	-9.93393	2.96355e-23	2.35658e-21	Slco3a1
ENSMUSG00000103435	18.3885	-1.316	0.513816	-2.56122	0.0104304	0.0440799	NA
ENSMUSG00000034522	466.861	-1.31337	0.143128	-9.17622	4.46502e-20	2.95878e-18	Zfp395
ENSMUSG00000052146	34.8226	-1.31244	0.369291	-3.55395	0.000379492	0.00278162	Rps10
ENSMUSG00000032688	2953.36	-1.30976	0.088846	-14.7419	3.46774e-49	7.2877e-47	Malt1
ENSMUSG00000033434	261.89	-1.30331	0.150569	-8.65593	4.88916e-18	2.68375e-16	Gtpbp6
ENSMUSG00000071266	17.7268	-1.30098	0.513581	-2.53316	0.011304	0.0470553	Zfp946
ENSMUSG00000054006	253.92	-1.29994	0.163161	-7.96722	1.62278e-15	7.30054e-14	NA
ENSMUSG00000028278	306.252	-1.29823	0.142827	-9.08958	9.94192e-20	6.35894e-18	Rragd
ENSMUSG00000004319	1326.37	-1.29361	0.097658	-13.2463	4.73931e-40	7.57825e-38	Clcn3
ENSMUSG00000067377	71.6925	-1.29161	0.262984	-4.91139	9.04353e-07	1.2538e-05	Tspan6
ENSMUSG00000053714	93.6166	-1.29081	0.228591	-5.6468	1.63463e-08	3.1434e-07	4732471J01Rik
ENSMUSG00000093661	170.107	-1.28759	0.176182	-7.3083	2.70547e-13	9.87597e-12	Eif4e3
ENSMUSG00000083672	21.6255	-1.28684	0.472129	-2.7256	0.00641842	0.0296363	Kpna2-ps
ENSMUSG00000033863	258.806	-1.2866	0.165403	-7.77862	7.33213e-15	3.11743e-13	Klf9
ENSMUSG00000002769	67.7925	-1.28404	0.311928	-4.11648	3.847e-05	0.000371347	Gnmt
ENSMUSG00000022906	754.318	-1.28025	0.110329	-11.6039	3.93769e-31	4.56121e-29	Parp9
ENSMUSG00000103219	84.5835	-1.27964	0.240866	-5.31268	1.08022e-07	1.80581e-06	NA
ENSMUSG00000031983	120.613	-1.2794	0.203399	-6.29013	3.17204e-10	7.96312e-09	2310022B05Rik
ENSMUSG00000005268	15.2235	-1.27736	0.619593	-2.0616	0.0392454	0.122447	Prlr
ENSMUSG00000043192	129.2	-1.27698	0.230468	-5.54082	3.0106e-08	5.56394e-07	Gpi-ps
ENSMUSG00000048852	72.2965	-1.26731	0.26559	-4.77166	1.82715e-06	2.41285e-05	Gm12185
ENSMUSG00000003865	281.278	-1.26463	0.173258	-7.2991	2.897e-13	1.0549e-11	Gys1
ENSMUSG00000022347	17.3743	-1.26362	0.570007	-2.21685	0.0266335	0.0915435	A1bg
ENSMUSG00000047139	204.841	-1.26315	0.18761	-6.73287	1.66349e-11	4.82674e-10	Cd24a
ENSMUSG00000052852	32.2714	-1.26284	0.386287	-3.26918	0.00107861	0.00676652	Reep1
ENSMUSG00000028885	16.8125	-1.26265	0.52266	-2.41582	0.0157	0.0609723	Smpdl3b
ENSMUSG00000028456	37.5706	-1.26209	0.349194	-3.6143	0.000301162	0.00227784	Unc13b
ENSMUSG00000015083	30.105	-1.26112	0.396865	-3.1777	0.00148447	0.0088449	C8g
ENSMUSG00000024873	24.8084	-1.25992	0.452106	-2.78678	0.00532354	0.0255429	Cnih2
ENSMUSG00000002043	235.633	-1.25825	0.164356	-7.65565	1.92337e-14	7.85962e-13	Trappc6a
ENSMUSG00000081221	29.9871	-1.2579	0.409261	-3.07359	0.00211499	0.011889	Gm14760
ENSMUSG00000030718	1145.15	-1.25705	0.0847758	-14.8279	9.66494e-50	2.06059e-47	Ppme1
ENSMUSG00000053522	102.485	-1.25619	0.215004	-5.84265	5.13768e-09	1.08281e-07	Lgals7
ENSMUSG00000038205	26.0105	-1.25568	0.428912	-2.92759	0.00341606	0.0178838	Prkab2
ENSMUSG00000042215	116.813	-1.25518	0.20383	-6.158	7.36706e-10	1.7567e-08	Bag2
ENSMUSG00000005547	51.5581	-1.25423	0.355937	-3.52375	0.000425493	0.0030774	Cyp2a5
ENSMUSG00000026200	45.4337	-1.25401	0.334048	-3.75397	0.000174053	0.00141542	Glb1l
ENSMUSG00000026077	80.6153	-1.25362	0.261801	-4.78843	1.68091e-06	2.24595e-05	Npas2
ENSMUSG00000051444	92.6331	-1.25343	0.226897	-5.52421	3.30968e-08	6.06336e-07	Bbs12
ENSMUSG00000036995	37.3773	-1.25235	0.375129	-3.33846	0.000842453	0.00551059	Asap3
ENSMUSG00000034855	18.4403	-1.2497	0.568328	-2.19891	0.027884	0.0945819	Cxcl10
ENSMUSG00000121096	17.1822	-1.24886	0.520673	-2.39854	0.0164604	0.0634065	NA
ENSMUSG00000004936	1113.39	-1.24796	0.087944	-14.1904	1.05104e-45	1.98228e-43	Map2k1
ENSMUSG00000090942	25.7215	-1.2447	0.437539	-2.84477	0.00444435	0.0222082	F830016B08Rik
ENSMUSG00000022246	21.5895	-1.23124	0.457447	-2.69153	0.00711242	0.0322094	Rai14
ENSMUSG00000045441	243.984	-1.22964	0.189132	-6.50149	7.95303e-11	2.15464e-09	Gprin3
ENSMUSG00000020723	22.3077	-1.22876	0.469707	-2.61602	0.00889613	0.0387307	Cacng4
ENSMUSG00000005696	365.524	-1.22794	0.139353	-8.81173	1.23226e-18	7.08115e-17	Sh2d1a
ENSMUSG00000028793	1423.95	-1.22749	0.0847409	-14.4852	1.5038e-47	3.07255e-45	Rnf19b
ENSMUSG00000099835	15.8826	-1.22554	0.526331	-2.32845	0.019888	0.0732896	NA
ENSMUSG00000026839	25.6178	-1.2253	0.516543	-2.37211	0.017687	0.0670428	Upp2
ENSMUSG00000117216	34.6116	-1.22439	0.358539	-3.41493	0.000637979	0.00434103	NA
ENSMUSG00000033307	8418.97	-1.22344	0.0756611	-16.17	8.21517e-59	2.19733e-56	Mif
ENSMUSG00000022667	19.721	-1.21975	0.524255	-2.32663	0.0199848	0.0735544	Cd200r1
ENSMUSG00000030584	14.6868	-1.21418	0.560778	-2.16516	0.0303751	0.100687	Dpf1
ENSMUSG00000004451	202.986	-1.21113	0.179329	-6.75367	1.44147e-11	4.24109e-10	Ralb
ENSMUSG00000020108	1690.01	-1.21102	0.106187	-11.4047	3.96265e-30	4.35034e-28	Ddit4
ENSMUSG00000046546	18.5626	-1.21043	0.496216	-2.43932	0.0147151	0.0581919	Fam43a
ENSMUSG00000081600	26.3863	-1.20923	0.510915	-2.36679	0.0179432	0.0678391	Gm12286
ENSMUSG00000083773	32.665	-1.20912	0.368242	-3.28348	0.00102533	0.00647645	Gm13394
ENSMUSG00000097061	28.2417	-1.20789	0.405692	-2.97736	0.00290746	0.0155873	9330151L19Rik
ENSMUSG00000059326	43.8837	-1.20751	0.341288	-3.5381	0.000403016	0.00293649	Csf2ra
ENSMUSG00000034640	193.112	-1.20586	0.17293	-6.97311	3.10015e-12	9.97949e-11	Tiparp
ENSMUSG00000053110	25.2473	-1.2054	0.418849	-2.87788	0.00400356	0.0203864	Yap1
ENSMUSG00000024462	48.4388	-1.20254	0.347298	-3.46255	0.00053508	0.00373946	Gabbr1
ENSMUSG00000071176	89.7417	-1.20118	0.234137	-5.13026	2.89348e-07	4.45717e-06	Arhgef10
ENSMUSG00000087108	148.129	-1.19783	0.203569	-5.88417	4.00058e-09	8.59396e-08	NA
ENSMUSG00000116815	30.268	-1.19706	0.396563	-3.0186	0.00253946	0.0138981	NA
ENSMUSG00000029016	93.0697	-1.19382	0.242767	-4.91754	8.76387e-07	1.21857e-05	Clcn6
ENSMUSG00000026170	19.6166	-1.19309	0.497456	-2.39839	0.0164673	0.0634164	Cyp27a1
ENSMUSG00000110899	81.5921	-1.19193	0.255673	-4.66193	3.13262e-06	3.87913e-05	NA
ENSMUSG00000069939	17.351	-1.18908	0.51865	-2.29263	0.0218691	0.0786104	NA
ENSMUSG00000022768	109.075	-1.18871	0.227342	-5.2287	1.70704e-07	2.76262e-06	Ccdc116
ENSMUSG00000085385	124.557	-1.18841	0.209595	-5.67004	1.42764e-08	2.76343e-07	Snhg17
ENSMUSG00000054072	2962.54	-1.18632	0.198571	-5.9743	2.31081e-09	5.18205e-08	Iigp1
ENSMUSG00000002910	27.8254	-1.18598	0.410122	-2.89177	0.00383073	0.0196492	Arrdc2
ENSMUSG00000090610	29.5181	-1.18528	0.406343	-2.91694	0.0035348	0.0183942	Gm3571
ENSMUSG00000035133	219.208	-1.18408	0.166324	-7.11913	1.08614e-12	3.63968e-11	Arhgap5
ENSMUSG00000110750	17.2043	-1.17966	0.555785	-2.1225	0.0337955	0.109189	NA
ENSMUSG00000074580	21.7184	-1.1781	0.461841	-2.55089	0.0107449	0.0452013	4931440P22Rik
ENSMUSG00000028967	233.939	-1.1775	0.173307	-6.79433	1.08813e-11	3.23384e-10	Errfi1
ENSMUSG00000036676	38.7224	-1.17429	0.377785	-3.10834	0.00188141	0.0107569	Tmtc3
ENSMUSG00000070407	677.585	-1.17334	0.110842	-10.5857	3.47158e-26	3.21198e-24	Hs3st3b1
ENSMUSG00000036402	615.922	-1.17331	0.265527	-4.41882	9.9241e-06	0.000110206	Gng12
ENSMUSG00000019487	209.518	-1.16715	0.168884	-6.91095	4.81404e-12	1.4878e-10	Trip10
ENSMUSG00000035356	409.722	-1.16644	0.134676	-8.66106	4.67391e-18	2.5752e-16	Nfkbiz
ENSMUSG00000101970	101.952	-1.16459	0.228358	-5.09985	3.39931e-07	5.14478e-06	Chaserr
ENSMUSG00000022686	151.021	-1.16072	0.185376	-6.26146	3.8138e-10	9.49321e-09	B3gnt5
ENSMUSG00000048721	150.409	-1.15885	0.211132	-5.48874	4.04803e-08	7.27113e-07	Fndc9
ENSMUSG00000039410	82.1789	-1.15607	0.577728	-2.00106	0.0453856	0.137182	Prdm16
ENSMUSG00000023175	4531.63	-1.15499	0.0689411	-16.7533	5.36093e-63	1.71445e-60	Bsg
ENSMUSG00000052125	70.4134	-1.14409	0.276232	-4.14176	3.44656e-05	0.000336669	F730043M19Rik
ENSMUSG00000046879	1857.33	-1.14321	0.207434	-5.51121	3.56373e-08	6.46437e-07	Irgm1
ENSMUSG00000022656	14.7037	-1.14111	0.579198	-1.97016	0.0488205	0.14518	Nectin3
ENSMUSG00000049232	695.991	-1.14041	0.245785	-4.63986	3.48639e-06	4.27047e-05	Tigd2
ENSMUSG00000121395	20.0621	-1.13787	0.492014	-2.31267	0.0207407	0.0755205	NA
ENSMUSG00000028716	71.8829	-1.13361	0.330478	-3.43022	0.000603095	0.00414392	Pdzk1ip1
ENSMUSG00000069008	28.1559	-1.13319	0.459299	-2.46722	0.0136167	0.054655	NA
ENSMUSG00000037003	16.8479	-1.1329	0.538415	-2.10414	0.0353662	0.112955	Tns2
ENSMUSG00000120198	55.2698	-1.13228	0.308383	-3.67168	0.000240965	0.00187955	NA
ENSMUSG00000045414	568.937	-1.12976	0.117564	-9.60971	7.27534e-22	5.37827e-20	Dipk2a
ENSMUSG00000031955	23.3217	-1.12896	0.474186	-2.38084	0.017273	0.0658129	Bcar1
ENSMUSG00000087366	58.9663	-1.12832	0.286067	-3.94427	8.00434e-05	0.000707644	Junos
ENSMUSG00000075289	14.0348	-1.1277	0.569005	-1.98188	0.0474926	0.14195	Carns1
ENSMUSG00000102976	54.1123	-1.12669	0.297188	-3.79118	0.000149936	0.001235	Zc3h11a
ENSMUSG00000024378	2412.88	-1.12614	0.0758673	-14.8436	7.65487e-50	1.65604e-47	Stard4
ENSMUSG00000010067	248.084	-1.12587	0.154981	-7.26453	3.74324e-13	1.34479e-11	Rassf1
ENSMUSG00000046805	36.6857	-1.12398	0.445952	-2.5204	0.011722	0.0484797	Mpeg1
ENSMUSG00000042351	1047.78	-1.12341	0.0977949	-11.4874	1.52681e-30	1.72776e-28	Grap2
ENSMUSG00000039959	36.6411	-1.1195	0.354603	-3.15705	0.00159372	0.00936682	Hip1
ENSMUSG00000023832	646.192	-1.11931	0.121555	-9.20828	3.31403e-20	2.22615e-18	Acat2
ENSMUSG00000106990	116.324	-1.11807	0.215844	-5.18	2.21891e-07	3.52129e-06	NA
ENSMUSG00000035863	21.4421	-1.11748	0.47196	-2.36773	0.0178974	0.0676835	Palm
ENSMUSG00000024533	101.079	-1.1119	0.223162	-4.98249	6.27711e-07	8.99149e-06	Spire1
ENSMUSG00000079694	26.2125	-1.11145	0.435022	-2.55493	0.0106208	0.0447558	Gm14862
ENSMUSG00000042207	986.303	-1.11026	0.0885352	-12.5403	4.49436e-36	6.54619e-34	Kdm5b
ENSMUSG00000018500	45.0864	-1.10904	0.316306	-3.50624	0.000454491	0.00325988	Adora2b
ENSMUSG00000029385	378.449	-1.10852	0.151127	-7.335	2.21722e-13	8.17483e-12	Ccng2
ENSMUSG00000098871	1258.47	-1.10818	0.114619	-9.66836	4.10901e-22	3.09988e-20	Mir6381
ENSMUSG00000027002	238.431	-1.10426	0.160281	-6.88954	5.59749e-12	1.7084e-10	Nckap1
ENSMUSG00000023755	35.7914	-1.10254	0.372992	-2.95592	0.00311735	0.0165617	Rhebl1
ENSMUSG00000114235	56.0642	-1.09953	0.285977	-3.8448	0.00012065	0.00101713	NA
ENSMUSG00000021067	597.425	-1.0982	0.1099	-9.99275	1.63968e-23	1.31094e-21	Sav1
ENSMUSG00000042035	65.4669	-1.09357	0.264336	-4.13704	3.51818e-05	0.000342301	Igsf3
ENSMUSG00000035171	255.701	-1.09275	0.151726	-7.20213	5.928e-13	2.04711e-11	1110059E24Rik
ENSMUSG00000035171	255.701	-1.09275	0.151726	-7.20213	5.928e-13	2.04711e-11	Gm54192
ENSMUSG00000032579	177.988	-1.09117	0.168357	-6.48127	9.09509e-11	2.43269e-09	Hemk1
ENSMUSG00000034731	255.721	-1.09039	0.169368	-6.43801	1.21051e-10	3.18566e-09	Dgkh
ENSMUSG00000074682	42.9864	-1.08938	0.324478	-3.35734	0.000786972	0.00520789	Zcchc3
ENSMUSG00000053442	192.99	-1.08889	0.200972	-5.41811	6.02328e-08	1.05236e-06	NA
ENSMUSG00000025347	26.5187	-1.08864	0.447513	-2.43265	0.0149888	0.0589414	Mettl7b
ENSMUSG00000037225	502.262	-1.08722	0.118968	-9.13873	6.31889e-20	4.13143e-18	Fgf2
ENSMUSG00000062309	21.7322	-1.08617	0.460974	-2.35624	0.0184609	0.0691918	Rpp25
ENSMUSG00000025656	286.995	-1.08058	0.147364	-7.33276	2.25455e-13	8.27101e-12	Arhgef9
ENSMUSG00000120024	874.8	-1.07654	0.249971	-4.30664	1.65753e-05	0.000174047	NA
ENSMUSG00000041180	119.943	-1.07599	0.20876	-5.15417	2.54758e-07	3.9785e-06	Hectd2
ENSMUSG00000021066	267.774	-1.07258	0.147051	-7.29393	3.01045e-13	1.0935e-11	Atl1
ENSMUSG00000087541	39.9661	-1.07052	0.33657	-3.18067	0.00146933	0.00877244	NA
ENSMUSG00000120356	125.957	-1.06978	0.217173	-4.9259	8.39723e-07	1.16981e-05	NA
ENSMUSG00000052151	55.8225	-1.06578	0.297381	-3.5839	0.000338501	0.00253033	Plpp2
ENSMUSG00000096655	46.2713	-1.06493	0.356108	-2.99047	0.00278547	0.0150374	1700065D16Rik
ENSMUSG00000121075	95.6308	-1.06347	0.220864	-4.81506	1.47152e-06	1.97694e-05	NA
ENSMUSG00000036206	52.3726	-1.06179	0.29754	-3.56855	0.000358959	0.00265359	Sh3bp4
ENSMUSG00000002227	372.668	-1.06106	0.133738	-7.93391	2.12345e-15	9.43747e-14	Mov10
ENSMUSG00000067931	124.556	-1.06038	0.218695	-4.84868	1.24284e-06	1.69447e-05	Zfp948
ENSMUSG00000044330	88.4073	-1.06026	0.318473	-3.3292	0.000870969	0.00566939	NA
ENSMUSG00000068606	81.8252	-1.05872	0.270639	-3.91194	9.15593e-05	0.000796528	Gm4841
ENSMUSG00000039438	19.3241	-1.05313	0.518689	-2.03038	0.0423182	0.129696	Ttc36
ENSMUSG00000031381	258.277	-1.05233	0.142341	-7.39302	1.43527e-13	5.40007e-12	Piga
ENSMUSG00000103072	28.7511	-1.04484	0.400103	-2.61142	0.00901667	0.0391396	NA
ENSMUSG00000057335	524.721	-1.04464	0.111562	-9.36371	7.69833e-21	5.44471e-19	Cep170
ENSMUSG00000041168	2419.62	-1.04423	0.0745464	-14.0077	1.39771e-44	2.57021e-42	Lonp1
ENSMUSG00000000982	1360.11	-1.04354	0.309649	-3.37007	0.000751498	0.00500783	Ccl3
ENSMUSG00000042870	53.4864	-1.04089	0.319764	-3.25518	0.00113322	0.00705192	Tom1
ENSMUSG00000116262	118.238	-1.03996	0.206367	-5.03935	4.67117e-07	6.88057e-06	NA
ENSMUSG00000046808	95.6757	-1.03986	0.236398	-4.39878	1.0886e-05	0.000119779	Atp10d
ENSMUSG00000028270	11201.6	-1.03887	0.0907755	-11.4444	2.50864e-30	2.79581e-28	Gbp2
ENSMUSG00000116858	23.3564	-1.03618	0.438483	-2.36311	0.0181221	0.0682525	NA
ENSMUSG00000042650	3592.4	-1.03556	0.063879	-16.2113	4.19608e-59	1.14312e-56	Alkbh5
ENSMUSG00000043445	1228.88	-1.03524	0.0950278	-10.894	1.23079e-27	1.20708e-25	Pgp
ENSMUSG00000073598	40.1346	-1.03267	0.356966	-2.8929	0.00381699	0.0195924	Smim33
ENSMUSG00000027075	25.9202	-1.03239	0.409995	-2.51806	0.0118004	0.0487219	Slc43a1
ENSMUSG00000035373	22.799	-1.03066	0.438417	-2.35088	0.0187292	0.0699605	Ccl7
ENSMUSG00000059743	1991.91	-1.02672	0.111668	-9.19434	3.77293e-20	2.52289e-18	Fdps
ENSMUSG00000029304	256.167	-1.02663	0.422694	-2.42878	0.0151496	0.0593992	Spp1
ENSMUSG00000050394	66.6318	-1.02627	0.300086	-3.41991	0.000626416	0.00428216	Armcx6
ENSMUSG00000020475	26.2397	-1.02315	0.42615	-2.4009	0.0163546	0.0631145	Pgam2
ENSMUSG00000004885	319.96	-1.02203	0.156146	-6.54531	5.93738e-11	1.62653e-09	Crabp2
ENSMUSG00000027997	219.688	-1.02084	0.182738	-5.58637	2.3187e-08	4.38436e-07	Casp6
ENSMUSG00000067071	161.071	-1.01412	0.17797	-5.69827	1.21026e-08	2.36442e-07	Hes6
ENSMUSG00000055413	40.4433	-1.0141	0.352856	-2.87398	0.0040533	0.020604	H2-Q5
ENSMUSG00000019189	1366.41	-1.01399	0.0828114	-12.2446	1.79625e-34	2.44673e-32	Rnf145
ENSMUSG00000085563	19.4641	-1.00874	0.484074	-2.08386	0.0371733	0.117477	NA
ENSMUSG00000105504	1989.19	-1.00681	0.096335	-10.4511	1.44772e-25	1.29075e-23	Gbp5
ENSMUSG00000053835	174.366	-1.00649	0.173745	-5.79293	6.91708e-09	1.42917e-07	H2-T24
ENSMUSG00000052684	257.591	-1.00176	0.14671	-6.82813	8.60269e-12	2.57748e-10	Jun
ENSMUSG00000021091	35.6574	-1.00116	0.411703	-2.43175	0.015026	0.0590248	Serpina3n
ENSMUSG00000000532	215.391	-1.00095	0.162125	-6.17393	6.66127e-10	1.60383e-08	Acvr1b
ENSMUSG00000087579	43.8021	-1.00052	0.343309	-2.91434	0.0035644	0.0185155	Hectd2os
ENSMUSG00000018919	37.7917	-0.997657	0.35383	-2.81959	0.00480844	0.0236869	Tm4sf5
ENSMUSG00000002578	82.5712	-0.997321	0.234182	-4.25875	2.05577e-05	0.00021193	Ikzf4
ENSMUSG00000050439	20.2197	-0.994442	0.490751	-2.02637	0.0427269	0.130555	Enthd1
ENSMUSG00000021069	25.8331	-0.98897	0.497948	-1.98609	0.0470232	0.140859	Pygl
ENSMUSG00000051790	150.208	-0.98845	0.195834	-5.04738	4.47917e-07	6.63576e-06	Nlgn2
ENSMUSG00000037400	2722.43	-0.988087	0.0837466	-11.7985	3.97189e-32	4.86921e-30	Atp11b
ENSMUSG00000040033	252.389	-0.988019	0.145953	-6.76942	1.29304e-11	3.81965e-10	Stat2
ENSMUSG00000041324	24.8446	-0.986872	0.476926	-2.06924	0.038524	0.120734	Inhba
ENSMUSG00000008384	344.345	-0.982741	0.137021	-7.17218	7.38119e-13	2.51936e-11	Sertad1
ENSMUSG00000032216	435.33	-0.981741	0.159743	-6.14574	7.95935e-10	1.88551e-08	Nedd4
ENSMUSG00000087370	463.221	-0.981216	0.12128	-8.09049	5.94254e-16	2.77526e-14	Tmem170b
ENSMUSG00000033487	319.752	-0.98081	0.133146	-7.36643	1.75263e-13	6.51083e-12	Fndc3a
ENSMUSG00000034993	269.86	-0.98034	0.16002	-6.12636	8.99107e-10	2.11967e-08	Vat1
ENSMUSG00000083287	26.3947	-0.979018	0.44997	-2.17574	0.0295748	0.0988664	NA
ENSMUSG00000020128	429.794	-0.978781	0.114259	-8.56632	1.06844e-17	5.79995e-16	Vps54
ENSMUSG00000003477	33.3173	-0.975606	0.396808	-2.45863	0.0139467	0.0557528	Inmt
ENSMUSG00000097993	30.5596	-0.974399	0.444709	-2.19109	0.0284451	0.0960202	Ptprv
ENSMUSG00000116504	79.2798	-0.973599	0.251703	-3.86805	0.000109709	0.000933988	I730030J21Rik
ENSMUSG00000032558	69.6427	-0.973434	0.281002	-3.46415	0.000531903	0.00372079	Nphp3
ENSMUSG00000027999	632.808	-0.973428	0.11442	-8.5075	1.77717e-17	9.47246e-16	Pla2g12a
ENSMUSG00000032578	1670.93	-0.972005	0.0817238	-11.8938	1.27486e-32	1.63082e-30	Cish
ENSMUSG00000046034	1280.25	-0.970552	0.0964081	-10.0671	7.7207e-24	6.34521e-22	Otulin
ENSMUSG00000023764	152.24	-0.970473	0.197082	-4.92421	8.46999e-07	1.17883e-05	Sfi1
ENSMUSG00000038037	576.043	-0.969889	0.137183	-7.07003	1.54897e-12	5.13217e-11	Socs1
ENSMUSG00000032661	85.1252	-0.969828	0.235873	-4.11166	3.92832e-05	0.000378451	Oas3
ENSMUSG00000021273	955.272	-0.968983	0.103345	-9.37623	6.8375e-21	4.85925e-19	Fdft1
ENSMUSG00000006517	392.523	-0.965462	0.153461	-6.29127	3.14886e-10	7.91843e-09	Mvd
ENSMUSG00000097710	20.5457	-0.964751	0.474843	-2.03173	0.0421813	0.129412	NA
ENSMUSG00000075270	33.1128	-0.962343	0.367253	-2.62038	0.00878324	0.0383072	Pde11a
ENSMUSG00000113831	23.9414	-0.959617	0.485297	-1.97738	0.0479986	0.14314	NA
ENSMUSG00000097418	36.1907	-0.959162	0.372184	-2.57712	0.00996278	0.0424204	Mir155hg
ENSMUSG00000057286	27.5788	-0.952194	0.450212	-2.11499	0.0344309	0.110738	St6galnac2
ENSMUSG00000022621	24.914	-0.951068	0.428449	-2.21979	0.0264328	0.0910663	Rabl2
ENSMUSG00000039911	37.9059	-0.950854	0.352815	-2.69505	0.00703783	0.0319252	Spsb1
ENSMUSG00000075229	473.662	-0.950802	0.111755	-8.50793	1.7707e-17	9.4723e-16	Mix23
ENSMUSG00000004040	3573.45	-0.950748	0.0718106	-13.2397	5.17866e-40	8.19175e-38	Stat3
ENSMUSG00000036537	70.9018	-0.950512	0.272564	-3.4873	0.000487916	0.00345915	Rnf113a1
ENSMUSG00000021876	45.9226	-0.949135	0.372432	-2.54848	0.0108193	0.0454492	Rnase4
ENSMUSG00000047368	511.168	-0.947759	0.123612	-7.66721	1.75777e-14	7.24328e-13	Abhd17b
ENSMUSG00000105096	69.6619	-0.947103	0.314917	-3.00747	0.00263434	0.0143365	Gbp10
ENSMUSG00000034394	953.204	-0.944539	0.290021	-3.25679	0.0011268	0.00702093	Lif
ENSMUSG00000022766	26.8622	-0.944324	0.437562	-2.15815	0.0309161	0.102089	Serpind1
ENSMUSG00000022996	20.2671	-0.943765	0.474435	-1.98924	0.0466745	0.140071	Wnt10b
ENSMUSG00000039232	578.717	-0.943627	0.135777	-6.94983	3.65719e-12	1.1595e-10	Stx11
ENSMUSG00000020644	300.887	-0.941978	0.135616	-6.94594	3.75962e-12	1.18686e-10	Id2
ENSMUSG00000019831	23.3107	-0.939774	0.431729	-2.17677	0.0294981	0.0986689	Wasf1
ENSMUSG00000031596	46.7693	-0.939742	0.395761	-2.37452	0.0175718	0.0667209	Slc7a2
ENSMUSG00000019987	57.5573	-0.938574	0.340848	-2.75364	0.0058936	0.0276469	Arg1
ENSMUSG00000086289	364.253	-0.938019	0.134703	-6.9636	3.31694e-12	1.05783e-10	NA
ENSMUSG00000022821	36.602	-0.934786	0.377282	-2.47769	0.0132237	0.0534435	Hgd
ENSMUSG00000032193	1000.58	-0.934638	0.10015	-9.33239	1.03514e-20	7.21705e-19	Ldlr
ENSMUSG00000090570	819.553	-0.933502	0.106635	-8.75417	2.05616e-18	1.15451e-16	NA
ENSMUSG00000049878	498.368	-0.931718	0.113792	-8.18793	2.65767e-16	1.28187e-14	Rlf
ENSMUSG00000033880	324.937	-0.931391	0.131442	-7.08592	1.38121e-12	4.58668e-11	Lgals3bp
ENSMUSG00000030103	2779.39	-0.930419	0.0884246	-10.5222	6.82875e-26	6.16305e-24	Bhlhe40
ENSMUSG00000097772	56.4252	-0.929252	0.327529	-2.83716	0.00455172	0.02266	5430416N02Rik
ENSMUSG00000008305	85.7452	-0.928762	0.259884	-3.57376	0.00035189	0.00260815	Tle1
ENSMUSG00000032308	100.653	-0.928666	0.229109	-4.05338	5.04827e-05	0.000472124	Ulk3
ENSMUSG00000103183	20.6689	-0.925298	0.454269	-2.03689	0.0416606	0.128215	NA
ENSMUSG00000032081	80.047	-0.925241	0.301132	-3.07254	0.00212244	0.0119218	Apoc3
ENSMUSG00000022020	335.916	-0.924234	0.134493	-6.87199	6.3311e-12	1.92035e-10	Naa16
ENSMUSG00000013275	791.361	-0.922853	0.0973022	-9.4844	2.43776e-21	1.77534e-19	Slc41a1
ENSMUSG00000040495	93.0367	-0.921584	0.235599	-3.91166	9.16656e-05	0.000796982	Chrm4
ENSMUSG00000031585	886.112	-0.918215	0.0927	-9.90524	3.95036e-23	3.1244e-21	Gtf2e2
ENSMUSG00000015337	342.827	-0.916971	0.12867	-7.12656	1.02909e-12	3.45639e-11	Endog
ENSMUSG00000026349	234.198	-0.916932	0.155406	-5.90023	3.62988e-09	7.87599e-08	Ccnt2
ENSMUSG00000030086	177.058	-0.916851	0.172688	-5.30929	1.10052e-07	1.83766e-06	Chchd6
ENSMUSG00000025027	1154.69	-0.916446	0.0849228	-10.7915	3.775e-27	3.62967e-25	Xpnpep1
ENSMUSG00000045294	1529.06	-0.916326	0.103097	-8.88797	6.22368e-19	3.67697e-17	Insig1
ENSMUSG00000002588	51.4136	-0.915811	0.377434	-2.42642	0.0152487	0.0596667	Pon1
ENSMUSG00000068747	88.3185	-0.915346	0.231013	-3.96232	7.42253e-05	0.000662577	Sort1
ENSMUSG00000096210	267.274	-0.914568	0.154826	-5.90705	3.48284e-09	7.57931e-08	H1f0
ENSMUSG00000045411	173.655	-0.91429	0.181954	-5.02486	5.03812e-07	7.3894e-06	2410002F23Rik
ENSMUSG00000005374	630.987	-0.9086	0.100051	-9.08135	1.07238e-19	6.7707e-18	Tbl2
ENSMUSG00000031557	1509.74	-0.908294	0.0885743	-10.2546	1.12845e-24	9.59571e-23	Plekha2
ENSMUSG00000028680	526.707	-0.907689	0.112748	-8.05062	8.23734e-16	3.79873e-14	Plk3
ENSMUSG00000035237	33.2469	-0.907256	0.3839	-2.36326	0.0181148	0.0682426	Lcat
ENSMUSG00000003031	448.765	-0.903032	0.120804	-7.47516	7.71078e-14	2.97725e-12	Cdkn1b
ENSMUSG00000027765	51.9403	-0.902955	0.312312	-2.8912	0.00383779	0.0196717	P2ry1
ENSMUSG00000040524	836.036	-0.90201	0.106012	-8.50858	1.76076e-17	9.45348e-16	Zfp609
ENSMUSG00000019845	164.618	-0.901865	0.175133	-5.1496	2.61045e-07	4.06804e-06	Tube1
ENSMUSG00000031644	405.41	-0.901655	0.121142	-7.44299	9.84345e-14	3.77101e-12	Nek1
ENSMUSG00000045639	48.7555	-0.901471	0.30973	-2.91051	0.00360844	0.0187112	Zfp629
ENSMUSG00000027832	22.9011	-0.899117	0.457179	-1.96667	0.0492218	0.146077	Ptx3
ENSMUSG00000011831	106.669	-0.895969	0.229918	-3.89691	9.74268e-05	0.000842001	Evi5
ENSMUSG00000022346	3603.19	-0.893697	0.0753126	-11.8665	1.76688e-32	2.24074e-30	Myc
ENSMUSG00000117869	90.3898	-0.89269	0.230088	-3.87977	0.000104555	0.000895815	Snhg4
ENSMUSG00000028961	2291.69	-0.89186	0.0815405	-10.9376	7.61637e-28	7.57057e-26	Pgd
ENSMUSG00000085433	33.463	-0.891813	0.383584	-2.32495	0.0200746	0.0738108	NA
ENSMUSG00000023828	43.6911	-0.888463	0.412134	-2.15577	0.031102	0.102504	Slc22a3
ENSMUSG00000039196	27.0514	-0.888351	0.446061	-1.99155	0.0464207	0.139509	Orm1
ENSMUSG00000056531	43.6589	-0.887121	0.323344	-2.74358	0.00607725	0.0283094	Ccdc18
ENSMUSG00000036863	158.662	-0.886102	0.177969	-4.97897	6.39248e-07	9.13894e-06	Syde2
ENSMUSG00000060407	41.7491	-0.885968	0.404498	-2.19029	0.028503	0.0960845	Cyp2a12
ENSMUSG00000079470	260.003	-0.884634	0.158126	-5.5945	2.21262e-08	4.19457e-07	Utp14b
ENSMUSG00000032316	768.549	-0.883839	0.0932547	-9.47769	2.59967e-21	1.8747e-19	Clk3
ENSMUSG00000021486	6148.81	-0.883285	0.0690606	-12.79	1.86478e-37	2.79926e-35	Prelid1
ENSMUSG00000087206	32.3797	-0.880434	0.377953	-2.32948	0.0198337	0.0731557	NA
ENSMUSG00000045282	57.1227	-0.879955	0.281635	-3.12445	0.00178137	0.0102877	Tmem86b
ENSMUSG00000021733	1414.98	-0.878368	0.0859278	-10.2222	1.57782e-24	1.33399e-22	Slc4a7
ENSMUSG00000086370	25.0745	-0.876765	0.416451	-2.10532	0.0352632	0.112701	Ftx
ENSMUSG00000038963	519.118	-0.876192	0.115466	-7.5883	3.24142e-14	1.29931e-12	Slco4a1
ENSMUSG00000078853	2885.42	-0.876058	0.24337	-3.59969	0.000318596	0.00239493	Igtp
ENSMUSG00000027676	33.6796	-0.87575	0.359333	-2.43716	0.0148033	0.058462	Ccdc39
ENSMUSG00000031980	34.2014	-0.875073	0.410027	-2.13418	0.0328279	0.10689	Agt
ENSMUSG00000022843	24.6509	-0.874486	0.430161	-2.03293	0.04206	0.129154	Clcn2
ENSMUSG00000020051	61.2117	-0.873688	0.34405	-2.53942	0.0111035	0.0463977	Pah
ENSMUSG00000021820	365.863	-0.872542	0.121384	-7.18826	6.56245e-13	2.25036e-11	Camk2g
ENSMUSG00000033287	247.636	-0.871041	0.142	-6.13407	8.56588e-10	2.02593e-08	Kctd17
ENSMUSG00000001441	1979.01	-0.871003	0.0743224	-11.7193	1.01567e-31	1.22471e-29	Npepps
ENSMUSG00000040502	157.283	-0.870837	0.205568	-4.23625	2.2728e-05	0.000231385	Marchf9
ENSMUSG00000019564	357.474	-0.869666	0.133816	-6.49897	8.08731e-11	2.18699e-09	Arid3a
ENSMUSG00000027829	428.389	-0.868211	0.121268	-7.15942	8.10184e-13	2.73991e-11	Ccnl1
ENSMUSG00000024805	1291.14	-0.865612	0.090731	-9.54042	1.42253e-21	1.04113e-19	Pcgf5
ENSMUSG00000090083	29.3244	-0.863457	0.411758	-2.097	0.0359934	0.11461	Rnf8
ENSMUSG00000030088	58.5923	-0.861642	0.342043	-2.5191	0.0117654	0.0486047	Aldh1l1
ENSMUSG00000025934	67.1238	-0.858797	0.338777	-2.53499	0.0112452	0.0468747	Gsta3
ENSMUSG00000003500	938.004	-0.857494	0.0936035	-9.16093	5.14537e-20	3.39433e-18	Impdh1
ENSMUSG00000024556	2366.77	-0.856585	0.0734934	-11.6553	2.15707e-31	2.53862e-29	Me2
ENSMUSG00000004043	1506.08	-0.855802	0.0819972	-10.437	1.68101e-25	1.48972e-23	Stat5a
ENSMUSG00000020120	1652.85	-0.854986	0.0875409	-9.7667	1.56459e-22	1.19878e-20	Plek
ENSMUSG00000037172	697.09	-0.853966	0.118305	-7.21837	5.26147e-13	1.83416e-11	Dennd11
ENSMUSG00000067825	96.4716	-0.853952	0.23276	-3.66882	0.000243676	0.00189869	Pex26
ENSMUSG00000091366	173.146	-0.85205	0.168262	-5.06383	4.10927e-07	6.1372e-06	NA
ENSMUSG00000053263	131.036	-0.850277	0.189353	-4.49043	7.10779e-06	8.14986e-05	Gm12592
ENSMUSG00000039153	30.8767	-0.848402	0.37456	-2.26506	0.023509	0.083255	Runx2
ENSMUSG00000038291	903.975	-0.847589	0.0938677	-9.02961	1.72278e-19	1.06511e-17	Snx25
ENSMUSG00000037795	518.07	-0.847006	0.118243	-7.16329	7.87651e-13	2.66985e-11	N4bp2
ENSMUSG00000002985	1182.38	-0.84516	0.427603	-1.97651	0.0480975	0.143376	Apoe
ENSMUSG00000033900	142.018	-0.845097	0.194067	-4.35467	1.3327e-05	0.000143	Map9
ENSMUSG00000033577	76.7125	-0.8447	0.295319	-2.8603	0.00423247	0.0213452	Myo6
ENSMUSG00000041515	8792.26	-0.844204	0.194367	-4.34336	1.4032e-05	0.0001498	Irf8
ENSMUSG00000121398	44.2489	-0.843169	0.363077	-2.32229	0.0202175	0.0742249	Slfn10-ps
ENSMUSG00000037278	1074.54	-0.840992	0.0887923	-9.47145	2.75986e-21	1.9805e-19	Tmem97
ENSMUSG00000027204	60.1565	-0.840714	0.307838	-2.73103	0.00631365	0.0292168	Fbn1
ENSMUSG00000078920	2312.89	-0.840061	0.0771363	-10.8906	1.27782e-27	1.2449e-25	Ifi47
ENSMUSG00000047898	752.127	-0.837755	0.103254	-8.11353	4.91684e-16	2.30356e-14	Ccr4
ENSMUSG00000014329	30.8737	-0.837088	0.382227	-2.19003	0.0285221	0.0961258	Bicc1
ENSMUSG00000067235	63.1314	-0.837067	0.317298	-2.63811	0.00833697	0.0366981	H2-Q10
ENSMUSG00000028362	1250.92	-0.836656	0.23484	-3.56266	0.000367117	0.00270574	Tnfsf8
ENSMUSG00000059714	84.4446	-0.836379	0.241311	-3.46598	0.000528299	0.00370262	Flot1
ENSMUSG00000028657	1359.58	-0.836279	0.110346	-7.57866	3.49131e-14	1.39528e-12	Ppt1
ENSMUSG00000023070	93.0756	-0.834304	0.285047	-2.9269	0.00342364	0.0179108	Rgn
ENSMUSG00000014932	38.802	-0.834105	0.353479	-2.3597	0.0182897	0.0687252	Yes1
ENSMUSG00000053477	113.853	-0.833259	0.200108	-4.16404	3.1267e-05	0.000308291	Tcf4
ENSMUSG00000028965	3298.37	-0.832094	0.0705122	-11.8007	3.86996e-32	4.78411e-30	Tnfrsf9
ENSMUSG00000071722	594.589	-0.832074	0.100532	-8.27672	1.26612e-16	6.29253e-15	Spin4
ENSMUSG00000033102	230.12	-0.831355	0.177104	-4.69416	2.67707e-06	3.36523e-05	Cdc14b
ENSMUSG00000022863	236.943	-0.830056	0.152266	-5.45134	4.99915e-08	8.82863e-07	Btg3
ENSMUSG00000056413	167.669	-0.826297	0.174359	-4.73905	2.14719e-06	2.79287e-05	Adap1
ENSMUSG00000044098	713.803	-0.824964	0.0982207	-8.39908	4.49979e-17	2.32268e-15	Rsbn1
ENSMUSG00000040253	746.953	-0.824875	0.116831	-7.0604	1.66022e-12	5.46387e-11	Gbp7
ENSMUSG00000036959	372.013	-0.824327	0.123637	-6.66733	2.60503e-11	7.39818e-10	Bcorl1
ENSMUSG00000040511	293.233	-0.82225	0.137114	-5.99684	2.01196e-09	4.56434e-08	Pvr
ENSMUSG00000031065	272.934	-0.821846	0.139319	-5.89902	3.65661e-09	7.91859e-08	Cdk16
ENSMUSG00000108414	353.704	-0.821765	0.134168	-6.1249	9.07382e-10	2.13576e-08	NA
ENSMUSG00000093930	4227.26	-0.821596	0.089821	-9.14704	5.85161e-20	3.84299e-18	Hmgcs1
ENSMUSG00000049502	870.028	-0.820989	0.113856	-7.21075	5.56439e-13	1.92606e-11	Dtx3l
ENSMUSG00000063972	35.1484	-0.820718	0.367256	-2.23473	0.0254353	0.0885421	Nr6a1
ENSMUSG00000025511	131.227	-0.82062	0.204303	-4.01668	5.90226e-05	0.000543015	Tspan4
ENSMUSG00000068114	153.821	-0.820516	0.189054	-4.34012	1.42407e-05	0.000151808	Ccdc134
ENSMUSG00000116165	68.3178	-0.820382	0.27861	-2.94456	0.00323417	0.0170652	Pdxp
ENSMUSG00000094410	234.857	-0.820351	0.186193	-4.40591	1.05342e-05	0.000116255	Zbed6
ENSMUSG00000025017	173.62	-0.819738	0.24071	-3.40551	0.000660414	0.00447918	Pik3ap1
ENSMUSG00000025314	217.45	-0.819066	0.192496	-4.25498	2.09064e-05	0.000214773	Ptprj
ENSMUSG00000023905	31.0808	-0.818183	0.401178	-2.03945	0.0414047	0.127627	Tnfrsf12a
ENSMUSG00000010064	67.0686	-0.814704	0.300962	-2.707	0.00678944	0.0310474	Slc38a3
ENSMUSG00000087174	57.7825	-0.814545	0.287892	-2.82935	0.00466433	0.0230956	5530601H04Rik
ENSMUSG00000024038	592.674	-0.813322	0.136182	-5.97234	2.3388e-09	5.23686e-08	Ndufv3
ENSMUSG00000029994	134.615	-0.813124	0.188312	-4.31795	1.57483e-05	0.000166313	Anxa4
ENSMUSG00000072847	32.3339	-0.812903	0.383066	-2.1221	0.0338295	0.109257	NA
ENSMUSG00000060131	367.534	-0.809421	0.149735	-5.4057	6.45574e-08	1.12524e-06	Atp8b4
ENSMUSG00000114934	1466.76	-0.809265	0.094583	-8.55614	1.16709e-17	6.28904e-16	NA
ENSMUSG00000066877	217.641	-0.808363	0.161368	-5.00943	5.45923e-07	7.93584e-06	Nck2
ENSMUSG00000086859	29.4064	-0.807348	0.39089	-2.06541	0.0388844	0.121527	Snhg20
ENSMUSG00000031634	305.52	-0.806432	0.135836	-5.93682	2.90608e-09	6.43846e-08	Ufsp2
ENSMUSG00000111375	42.8416	-0.803846	0.320502	-2.50809	0.0121386	0.0498525	Btbd8
ENSMUSG00000020900	394.024	-0.803265	0.398111	-2.01769	0.0436234	0.132756	Myh10
ENSMUSG00000074768	98.2544	-0.802662	0.267325	-3.00257	0.00267714	0.0145273	Bhmt
ENSMUSG00000029221	484.303	-0.802631	0.112024	-7.16482	7.78867e-13	2.64617e-11	Slc30a9
ENSMUSG00000031012	82.0171	-0.801079	0.245523	-3.26275	0.00110338	0.00689252	Cask
ENSMUSG00000100691	30.2065	-0.800508	0.403509	-1.98387	0.0472708	0.141514	NA
ENSMUSG00000000247	46.7873	-0.799244	0.330498	-2.4183	0.0155932	0.0606854	Lhx2
ENSMUSG00000103178	70.6422	-0.797668	0.258301	-3.08814	0.00201414	0.0113881	NA
ENSMUSG00000017677	865.762	-0.79544	0.0896284	-8.87487	7.00144e-19	4.11993e-17	Wsb1
ENSMUSG00000032333	152.626	-0.795219	0.180121	-4.41492	1.01049e-05	0.000111937	Stoml1
ENSMUSG00000027952	604.373	-0.795162	0.135809	-5.85499	4.77029e-09	1.00827e-07	Pmvk
ENSMUSG00000049957	196.064	-0.793132	0.155487	-5.10093	3.3798e-07	5.12158e-06	Ccdc137
ENSMUSG00000086862	68.6922	-0.791184	0.257929	-3.06745	0.00215894	0.0120945	Gm13546
ENSMUSG00000054115	346.585	-0.789899	0.127559	-6.19241	5.9252e-10	1.43601e-08	Skp2
ENSMUSG00000040435	193.687	-0.789133	0.171887	-4.59099	4.41144e-06	5.28044e-05	Ppp1r15a
ENSMUSG00000008540	114.413	-0.789029	0.272361	-2.89699	0.00376757	0.0193657	Mgst1
ENSMUSG00000004846	865.988	-0.788796	0.0963466	-8.18707	2.67662e-16	1.28679e-14	Plod3
ENSMUSG00000020021	48.2593	-0.7883	0.312564	-2.52204	0.0116676	0.048309	Fgd6
ENSMUSG00000034471	62.6905	-0.787996	0.338053	-2.33098	0.0197543	0.0729615	Caskin2
ENSMUSG00000087341	474.423	-0.785697	0.112684	-6.97254	3.11259e-12	9.99766e-11	0610040F04Rik
ENSMUSG00000026785	85.708	-0.785334	0.247784	-3.16944	0.00152735	0.00905274	Pkn3
ENSMUSG00000097194	114.791	-0.784874	0.224779	-3.49176	0.000479851	0.00341348	NA
ENSMUSG00000020385	251.117	-0.7828	0.157635	-4.96591	6.83785e-07	9.72839e-06	Clk4
ENSMUSG00000028613	245.087	-0.782571	0.150495	-5.19998	1.99313e-07	3.18286e-06	Lrp8
ENSMUSG00000035828	1184.09	-0.780985	0.0858415	-9.09799	9.20201e-20	5.91139e-18	Pim3
ENSMUSG00000059518	532.462	-0.780823	0.108029	-7.22792	4.90465e-13	1.71791e-11	Znhit1
ENSMUSG00000017715	558.6	-0.779093	0.108283	-7.19496	6.24776e-13	2.15248e-11	Pgs1
ENSMUSG00000085241	137.644	-0.778929	0.18747	-4.15494	3.25367e-05	0.000319738	Snhg3
ENSMUSG00000025145	84.8323	-0.778424	0.236838	-3.28674	0.00101355	0.0064241	Lrrc45
ENSMUSG00000022464	58.6734	-0.777983	0.358723	-2.16876	0.030101	0.100117	Slc38a4
ENSMUSG00000022009	454.135	-0.776586	0.116791	-6.64935	2.94398e-11	8.24931e-10	Nufip1
ENSMUSG00000073409	153.69	-0.77479	0.17542	-4.41676	1.00189e-05	0.000111153	H2-Q6
ENSMUSG00000029287	376.322	-0.774141	0.329174	-2.35177	0.0186843	0.0698336	Tgfbr3
ENSMUSG00000091021	285.222	-0.77323	0.13389	-5.77513	7.68958e-09	1.56678e-07	NA
ENSMUSG00000078606	79.2569	-0.771475	0.248575	-3.10359	0.00191186	0.0109055	Gvin2
ENSMUSG00000022515	90.6886	-0.769379	0.235373	-3.26876	0.00108018	0.00677347	Anks3
ENSMUSG00000059325	69.4558	-0.76937	0.273898	-2.80897	0.00497007	0.0242386	Hopx
ENSMUSG00000026980	1041.6	-0.768755	0.0993177	-7.74036	9.91345e-15	4.1787e-13	Ly75
ENSMUSG00000086196	157.519	-0.768234	0.19521	-3.93541	8.30536e-05	0.000729869	NA
ENSMUSG00000032018	1030.47	-0.767866	0.085967	-8.9321	4.17984e-19	2.49958e-17	Sc5d
ENSMUSG00000025094	33.9861	-0.76725	0.366769	-2.09191	0.0364462	0.115776	Slc18a2
ENSMUSG00000024079	183.858	-0.766875	0.185914	-4.1249	3.70892e-05	0.000358724	Eif2ak2
ENSMUSG00000046785	237.158	-0.764972	0.16723	-4.57439	4.77621e-06	5.63454e-05	Epm2aip1
ENSMUSG00000006310	379.032	-0.76464	0.142159	-5.37877	7.49982e-08	1.29495e-06	Zbtb32
ENSMUSG00000085105	194.103	-0.764213	0.158317	-4.82711	1.3853e-06	1.87653e-05	Gm12758
ENSMUSG00000050174	225.134	-0.760751	0.147953	-5.14184	2.72067e-07	4.2086e-06	Nudt6
ENSMUSG00000029001	36.3607	-0.760216	0.358455	-2.12081	0.0339376	0.109462	Fbxo44
ENSMUSG00000040663	45.6335	-0.758849	0.332007	-2.28564	0.0222752	0.0797174	Clcf1
ENSMUSG00000025130	7585.48	-0.758442	0.0608745	-12.4591	1.2474e-35	1.79907e-33	P4hb
ENSMUSG00000035239	203.464	-0.75609	0.17063	-4.43117	9.37217e-06	0.000105167	Neu3
ENSMUSG00000001542	1592.48	-0.756081	0.0997938	-7.57643	3.55183e-14	1.41219e-12	Ell2
ENSMUSG00000032883	295.94	-0.755311	0.163522	-4.61901	3.85572e-06	4.66076e-05	Acsl3
ENSMUSG00000027533	726.293	-0.754907	0.112994	-6.68093	2.37439e-11	6.7693e-10	Fabp5
ENSMUSG00000029482	1066.5	-0.754879	0.095453	-7.90838	2.6076e-15	1.14852e-13	Aacs
ENSMUSG00000059423	91.0271	-0.754507	0.234649	-3.21548	0.00130229	0.00791324	Zfp933
ENSMUSG00000026707	128.451	-0.752908	0.201762	-3.73166	0.000190222	0.00152499	Nsun6
ENSMUSG00000040183	43.7416	-0.752894	0.328155	-2.29432	0.0217721	0.0783869	Ankrd6
ENSMUSG00000021910	1988.48	-0.752842	0.0745044	-10.1047	5.26754e-24	4.35342e-22	Nisch
ENSMUSG00000040621	254.208	-0.750793	0.154238	-4.86776	1.12872e-06	1.55039e-05	Gemin8
ENSMUSG00000048376	472.515	-0.749799	0.121376	-6.17748	6.51347e-10	1.57339e-08	F2r
ENSMUSG00000022102	400.67	-0.747269	0.127106	-5.8791	4.12514e-09	8.79492e-08	Dok2
ENSMUSG00000035890	1087.04	-0.744554	0.0914906	-8.13804	4.01739e-16	1.90032e-14	Rnf126
ENSMUSG00000034893	401.401	-0.743284	0.117349	-6.33395	2.38964e-10	6.10312e-09	Cog3
ENSMUSG00000035678	71.0158	-0.739891	0.265228	-2.78965	0.00527654	0.0253587	Tnfsf9
ENSMUSG00000020228	610.033	-0.73876	0.102185	-7.22966	4.84215e-13	1.70007e-11	Helb
ENSMUSG00000027030	3051.53	-0.737818	0.101371	-7.27839	3.37823e-13	1.22106e-11	Stk39
ENSMUSG00000030166	80.2848	-0.735257	0.257344	-2.8571	0.00427526	0.0215241	Rad52
ENSMUSG00000024947	868.56	-0.735037	0.0928155	-7.91933	2.38788e-15	1.0549e-13	Men1
ENSMUSG00000033987	82.5433	-0.734997	0.237715	-3.09193	0.00198862	0.0112648	Dnah17
ENSMUSG00000030284	121.5	-0.734816	0.202677	-3.62556	0.000288337	0.00219664	Creld1
ENSMUSG00000031604	1032.7	-0.734442	0.110252	-6.66146	2.71113e-11	7.65517e-10	Msmo1
ENSMUSG00000028943	297.653	-0.733778	0.143191	-5.12445	2.98404e-07	4.56797e-06	Espn
ENSMUSG00000084274	39.2748	-0.732571	0.351456	-2.08439	0.0371249	0.117349	NA
ENSMUSG00000025227	105.591	-0.732236	0.213903	-3.42321	0.000618861	0.00424432	Mfsd13a
ENSMUSG00000017418	1551.59	-0.731345	0.0958925	-7.62672	2.40806e-14	9.7859e-13	Arl5b
ENSMUSG00000026011	403.817	-0.731119	0.330641	-2.21122	0.0270205	0.0923772	Ctla4
ENSMUSG00000003378	63.9883	-0.728708	0.294086	-2.47787	0.0132168	0.0534301	Grik5
ENSMUSG00000073627	32.996	-0.725954	0.368724	-1.96883	0.0489728	0.145514	NA
ENSMUSG00000035107	33.6867	-0.725417	0.367952	-1.9715	0.0486666	0.144867	Dcbld2
ENSMUSG00000086680	115.836	-0.721669	0.211287	-3.41559	0.000636448	0.00433262	NA
ENSMUSG00000020183	453.942	-0.720419	0.151696	-4.74909	2.04339e-06	2.66803e-05	Cpm
ENSMUSG00000029714	255.651	-0.717564	0.152413	-4.70802	2.50136e-06	3.17219e-05	Gigyf1
ENSMUSG00000022999	113.134	-0.716781	0.22359	-3.20578	0.00134696	0.00813096	Lmbr1l
ENSMUSG00000033933	836.706	-0.716008	0.110393	-6.48599	8.81531e-11	2.36646e-09	Vhl
ENSMUSG00000022802	57.4942	-0.71462	0.306518	-2.33141	0.0197317	0.0729126	Lmln
ENSMUSG00000055866	63.7498	-0.714517	0.26828	-2.66332	0.00773734	0.0345444	Per2
ENSMUSG00000020309	86.65	-0.713672	0.245599	-2.90585	0.00366261	0.0189259	Chac2
ENSMUSG00000023087	410.029	-0.713494	0.121049	-5.89427	3.76334e-09	8.11768e-08	Noct
ENSMUSG00000000876	202.531	-0.713076	0.172301	-4.13855	3.4951e-05	0.000340506	Pxmp4
ENSMUSG00000042408	43.5763	-0.711191	0.317312	-2.2413	0.0250069	0.0874022	Zmym6
ENSMUSG00000060550	1029.07	-0.709931	0.223403	-3.17781	0.00148394	0.0088449	H2-Q7
ENSMUSG00000060550	1029.07	-0.709931	0.223403	-3.17781	0.00148394	0.0088449	H2-Q9
ENSMUSG00000039191	2284.98	-0.709643	0.0878642	-8.07659	6.66029e-16	3.09084e-14	Rbpj
ENSMUSG00000075284	3575.4	-0.706114	0.066772	-10.575	3.89184e-26	3.56265e-24	Wipf1
ENSMUSG00000098188	40.2823	-0.705654	0.329987	-2.13843	0.0324817	0.106045	Sowahc
ENSMUSG00000026821	228.545	-0.704965	0.149935	-4.7018	2.57881e-06	3.25731e-05	Ralgds
ENSMUSG00000064043	124.018	-0.704637	0.216208	-3.25908	0.00111775	0.0069734	Trerf1
ENSMUSG00000035834	301.437	-0.702327	0.132106	-5.31637	1.05858e-07	1.77975e-06	Polr3g
ENSMUSG00000039910	586.888	-0.701447	0.131813	-5.32154	1.02895e-07	1.73588e-06	Cited2
ENSMUSG00000039234	96.942	-0.700721	0.230247	-3.04335	0.00233964	0.0129734	Sec24d
ENSMUSG00000022351	1590.26	-0.700575	0.0758714	-9.23371	2.61413e-20	1.78867e-18	Sqle
ENSMUSG00000000594	638.108	-0.700004	0.121988	-5.73832	9.56221e-09	1.91387e-07	Gm2a
ENSMUSG00000020919	2031.08	-0.699401	0.0822789	-8.50038	1.88977e-17	1.00362e-15	Stat5b
ENSMUSG00000040570	83.2485	-0.699348	0.239249	-2.92309	0.00346574	0.0180835	Rundc3b
ENSMUSG00000031671	189.407	-0.699304	0.174686	-4.00321	6.24889e-05	0.000570269	Setd6
ENSMUSG00000018899	2387.82	-0.698667	0.0783887	-8.91285	4.97379e-19	2.96233e-17	Irf1
ENSMUSG00000032265	244.101	-0.697767	0.17094	-4.08194	4.46607e-05	0.0004236	Tent5a
ENSMUSG00000018199	135.466	-0.697051	0.185409	-3.75953	0.000170232	0.00138741	Ro60
ENSMUSG00000024937	419.048	-0.69693	0.128119	-5.4397	5.33717e-08	9.39176e-07	Ehbp1l1
ENSMUSG00000072235	1157.38	-0.693353	0.109331	-6.3418	2.27103e-10	5.85098e-09	Tuba1a
ENSMUSG00000029056	183.926	-0.693328	0.162075	-4.27784	1.88719e-05	0.000195648	Pank4
ENSMUSG00000040429	56.3158	-0.692997	0.307264	-2.25538	0.0241097	0.0848686	Mterf1a
ENSMUSG00000049764	1603.87	-0.691821	0.255743	-2.70514	0.0068276	0.0311638	Zfp280b
ENSMUSG00002076295	49.4064	-0.691669	0.311985	-2.21699	0.0266235	0.0915304	NA
ENSMUSG00000112627	53.2382	-0.690941	0.314925	-2.19399	0.0282363	0.0954685	4933412E12Rik
ENSMUSG00000039967	729.111	-0.689858	0.109725	-6.28714	3.2337e-10	8.10407e-09	Zfp292
ENSMUSG00000097195	122.759	-0.689832	0.210258	-3.28089	0.00103482	0.00652797	Snhg5
ENSMUSG00000030410	260.875	-0.689549	0.146223	-4.71573	2.40842e-06	3.08089e-05	Dmwd
ENSMUSG00000028889	563.63	-0.689313	0.105087	-6.55945	5.40053e-11	1.48778e-09	Yrdc
ENSMUSG00000016552	115.148	-0.689091	0.201737	-3.41579	0.000635971	0.00433137	Foxred2
ENSMUSG00000027559	91.6772	-0.688821	0.292661	-2.35364	0.0185904	0.0695357	Car3
ENSMUSG00000022445	51.8681	-0.687243	0.308632	-2.22674	0.0259647	0.0898566	Cyp2d26
ENSMUSG00000020611	4326.24	-0.685466	0.0663568	-10.33	5.15542e-25	4.50683e-23	Gna13
ENSMUSG00000045868	198.357	-0.68274	0.182659	-3.73778	0.000185655	0.00149244	Gvin1
ENSMUSG00000106943	55.8295	-0.682299	0.27845	-2.45035	0.0142719	0.0567442	Dancr
ENSMUSG00000058135	83.4888	-0.682097	0.320008	-2.1315	0.033048	0.107384	Gstm1
ENSMUSG00000042275	99.4419	-0.68182	0.230178	-2.96214	0.0030551	0.0162662	Pelo
ENSMUSG00000015112	362.604	-0.680718	0.121175	-5.61765	1.93569e-08	3.68381e-07	Slc25a13
ENSMUSG00000059474	417.746	-0.680233	0.125405	-5.42429	5.81848e-08	1.019e-06	Mbtd1
ENSMUSG00000026770	7524.85	-0.679914	0.0669442	-10.1564	3.10273e-24	2.59342e-22	Il2ra
ENSMUSG00000037243	52.642	-0.679547	0.297934	-2.28086	0.0225565	0.0804628	Zfp692
ENSMUSG00000029647	468.904	-0.679416	0.115629	-5.87585	4.20683e-09	8.94317e-08	Pan3
ENSMUSG00000003053	66.1498	-0.679114	0.34242	-1.98328	0.0473365	0.141596	Cyp2c29
ENSMUSG00000028979	61.0469	-0.679087	0.292663	-2.32037	0.0203208	0.0744845	Masp2
ENSMUSG00000027603	61.4228	-0.678956	0.281006	-2.41616	0.0156851	0.0609611	Ggt7
ENSMUSG00000040472	208.272	-0.676945	0.153314	-4.4154	1.00823e-05	0.000111771	Rabggta
ENSMUSG00000018821	46.5899	-0.676551	0.333443	-2.02899	0.0424597	0.129969	Avpi1
ENSMUSG00000070691	532.418	-0.675931	0.148622	-4.54799	5.416e-06	6.32842e-05	Runx3
ENSMUSG00000041354	97.6123	-0.673038	0.23158	-2.90629	0.00365744	0.0189138	Rgl2
ENSMUSG00000074149	53.4197	-0.672512	0.291108	-2.31018	0.0208783	0.0758185	Gm10634
ENSMUSG00000021211	60.0637	-0.672431	0.29465	-2.28213	0.0224816	0.0802539	Akr1c12
ENSMUSG00000035992	649.492	-0.671982	0.116579	-5.76415	8.20683e-09	1.66986e-07	Fnip1
ENSMUSG00000040929	85.702	-0.67162	0.249803	-2.6886	0.00717521	0.0324185	Rfx3
ENSMUSG00000001467	4352.05	-0.671615	0.0823564	-8.15498	3.49232e-16	1.65728e-14	Cyp51
ENSMUSG00000000078	1452.5	-0.67153	0.0812175	-8.2683	1.35884e-16	6.73059e-15	Klf6
ENSMUSG00000066043	141.102	-0.668249	0.185666	-3.5992	0.000319192	0.00239818	Phactr4
ENSMUSG00000041773	754.084	-0.667984	0.116204	-5.74837	9.01081e-09	1.81835e-07	Enc1
ENSMUSG00000041341	812.146	-0.667313	0.0952351	-7.00701	2.43467e-12	7.95921e-11	Atg2b
ENSMUSG00000089998	261.858	-0.667134	0.141042	-4.73004	2.24479e-06	2.89423e-05	Phtf1os
ENSMUSG00000037270	824.175	-0.666969	0.13967	-4.7753	1.79435e-06	2.38023e-05	Bltp1
ENSMUSG00000067199	43.1113	-0.666915	0.327314	-2.03754	0.0415962	0.128051	Frat1
ENSMUSG00000037652	831.779	-0.66621	0.104582	-6.37023	1.88742e-10	4.89697e-09	Phc3
ENSMUSG00000038895	56.7685	-0.665424	0.281779	-2.36151	0.0182008	0.0684831	Zfp653
ENSMUSG00000028173	50.4555	-0.665342	0.306454	-2.1711	0.0299239	0.099708	Wls
ENSMUSG00000047867	967.934	-0.664199	0.104902	-6.33164	2.42571e-10	6.16314e-09	Gimap6
ENSMUSG00000004317	196.611	-0.662978	0.171289	-3.87053	0.000108599	0.000926685	Clcn5
ENSMUSG00000028954	1788.9	-0.661946	0.0818482	-8.08748	6.09106e-16	2.83562e-14	Nub1
ENSMUSG00000052837	5624.72	-0.660146	0.078256	-8.43572	3.29172e-17	1.71718e-15	Junb
ENSMUSG00000026743	605.606	-0.660126	0.110468	-5.97572	2.29074e-09	5.1449e-08	Mllt10
ENSMUSG00000023009	172.893	-0.658828	0.199081	-3.30935	0.000935132	0.0060073	Nckap5l
ENSMUSG00000031722	107.248	-0.658763	0.291552	-2.2595	0.0238522	0.0841866	Hp
ENSMUSG00000042579	43.8235	-0.658722	0.31662	-2.08048	0.0374817	0.118223	4632404H12Rik
ENSMUSG00000097231	167.153	-0.658119	0.171451	-3.83852	0.00012378	0.00104113	NA
ENSMUSG00000085355	180.564	-0.657008	0.187131	-3.51095	0.000446516	0.00321105	3010003L21Rik
ENSMUSG00000086290	100.681	-0.656352	0.234285	-2.80152	0.00508632	0.0246174	Snhg12
ENSMUSG00000018008	640.661	-0.655843	0.137628	-4.76534	1.88536e-06	2.48304e-05	Cyth4
ENSMUSG00000033257	556.551	-0.654439	0.111846	-5.85125	4.87896e-09	1.02976e-07	Ttll4
ENSMUSG00000020593	191.946	-0.654268	0.200197	-3.26812	0.00108266	0.0067832	Lpin1
ENSMUSG00000047648	107.634	-0.653092	0.207496	-3.14749	0.00164681	0.00961456	Fbxo30
ENSMUSG00000097405	128.322	-0.652486	0.192326	-3.3926	0.000692321	0.0046719	D630044L22Rik
ENSMUSG00000048371	469.412	-0.650605	0.111085	-5.85684	4.71751e-09	9.9855e-08	Pdp2
ENSMUSG00000110148	300.232	-0.648569	0.156999	-4.13103	3.61145e-05	0.000350218	NA
ENSMUSG00000054520	764.534	-0.648401	0.113407	-5.71745	1.08133e-08	2.14097e-07	Sh3bp2
ENSMUSG00000020454	2234.07	-0.648082	0.0880044	-7.3642	1.78209e-13	6.60362e-12	Eif4enif1
ENSMUSG00000106588	53.4979	-0.647574	0.304797	-2.12461	0.0336195	0.10877	NA
ENSMUSG00000018189	1476.58	-0.647318	0.0842538	-7.68295	1.55462e-14	6.49715e-13	Uchl5
ENSMUSG00000040274	1401.37	-0.64679	0.0809482	-7.99018	1.34744e-15	6.13689e-14	Cdk6
ENSMUSG00000031805	2836.41	-0.646766	0.0670179	-9.65063	4.8853e-22	3.6481e-20	Jak3
ENSMUSG00000000275	733.716	-0.64531	0.0958816	-6.73028	1.69333e-11	4.89402e-10	Trim25
ENSMUSG00000037860	71.8174	-0.644368	0.288238	-2.23554	0.025382	0.0884403	Aim2
ENSMUSG00000022797	10388.3	-0.643199	0.072872	-8.82642	1.08076e-18	6.24906e-17	Tfrc
ENSMUSG00000070730	952.159	-0.641863	0.0999044	-6.42477	1.32073e-10	3.45723e-09	Rmdn3
ENSMUSG00000052566	88.4714	-0.640459	0.239182	-2.67771	0.00741283	0.0333487	Hook2
ENSMUSG00000069662	93.2976	-0.638263	0.225068	-2.83586	0.00457021	0.0227213	Marcks
ENSMUSG00000025137	639.288	-0.637852	0.113446	-5.62254	1.88171e-08	3.58572e-07	Pcyt2
ENSMUSG00000003882	136.04	-0.63584	0.194656	-3.26648	0.00108895	0.00681392	Il7r
ENSMUSG00000054611	1380.29	-0.635541	0.0850089	-7.47617	7.65201e-14	2.96233e-12	Kdm2a
ENSMUSG00000033295	69.3591	-0.634911	0.256822	-2.47218	0.0134292	0.0541441	Ptprf
ENSMUSG00000033799	622.166	-0.631545	0.12812	-4.92934	8.2508e-07	1.1505e-05	Tasor2
ENSMUSG00000052751	78.889	-0.630144	0.23661	-2.66322	0.00773967	0.0345444	Repin1
ENSMUSG00000040860	117.111	-0.62946	0.200319	-3.14229	0.00167633	0.00976265	Crocc
ENSMUSG00000036875	334.712	-0.629124	0.129306	-4.8654	1.14225e-06	1.5675e-05	Dna2
ENSMUSG00000020346	1391.25	-0.629045	0.0909781	-6.91424	4.70382e-12	1.4568e-10	Mgat1
ENSMUSG00000099923	54.437	-0.628763	0.318383	-1.97487	0.0482834	0.143872	NA
ENSMUSG00000029071	194.773	-0.628603	0.163609	-3.84211	0.000121981	0.00102775	Dvl1
ENSMUSG00000043931	208.94	-0.628544	0.198498	-3.1665	0.00154287	0.00912634	Gimap7
ENSMUSG00000036620	55.0478	-0.625298	0.288456	-2.16774	0.0301785	0.100246	Mgat4b
ENSMUSG00000002250	503.486	-0.624713	0.114759	-5.44368	5.219e-08	9.19481e-07	Ppard
ENSMUSG00000002250	503.486	-0.624713	0.114759	-5.44368	5.219e-08	9.19481e-07	1810013A23Rik
ENSMUSG00000073771	141.832	-0.623453	0.189239	-3.29453	0.00098587	0.00628578	Btbd19
ENSMUSG00000024789	4406.38	-0.622774	0.112195	-5.55081	2.84341e-08	5.28424e-07	Jak2
ENSMUSG00000028337	604.199	-0.622703	0.141832	-4.39042	1.13131e-05	0.000123645	Coro2a
ENSMUSG00000053469	171.335	-0.622025	0.178835	-3.47821	0.000504769	0.00356147	Tg
ENSMUSG00000042354	1187.42	-0.62181	0.0834401	-7.45217	9.18145e-14	3.53582e-12	Gnl3
ENSMUSG00000056687	563.194	-0.621784	0.133606	-4.65386	3.25776e-06	4.02054e-05	Gm11696
ENSMUSG00000097392	57.339	-0.621415	0.288261	-2.15574	0.031104	0.102504	Thoc2l
ENSMUSG00000120801	49.9317	-0.620642	0.304371	-2.0391	0.0414401	0.127697	NA
ENSMUSG00000033124	106.795	-0.620208	0.213619	-2.90333	0.00369219	0.0190716	Atg9a
ENSMUSG00000108888	205.347	-0.619982	0.165311	-3.75039	0.00017656	0.00143095	NA
ENSMUSG00000063659	189.001	-0.61972	0.177446	-3.49245	0.000478613	0.00340632	Zbtb18
ENSMUSG00000091191	754.347	-0.619621	0.105487	-5.87394	4.25559e-09	9.03376e-08	NA
ENSMUSG00000037447	660.045	-0.619348	0.102797	-6.02494	1.69171e-09	3.87643e-08	Arid5a
ENSMUSG00000026475	2042.91	-0.619141	0.116079	-5.33381	9.61721e-08	1.63182e-06	Rgs16
ENSMUSG00000082896	62.3531	-0.618897	0.270743	-2.28592	0.0222591	0.0797174	NA
ENSMUSG00000099568	561.16	-0.618588	0.149225	-4.14533	3.39325e-05	0.000331902	NA
ENSMUSG00000003528	722.069	-0.617638	0.114283	-5.40447	6.50015e-08	1.13164e-06	Slc25a1
ENSMUSG00000018449	102.446	-0.616532	0.227621	-2.70859	0.00675696	0.030935	Rpain
ENSMUSG00000021460	168.209	-0.615134	0.193303	-3.18223	0.00146147	0.00872908	Auh
ENSMUSG00000097275	988.072	-0.612756	0.0883931	-6.93217	4.14433e-12	1.29442e-10	NA
ENSMUSG00000032449	349.007	-0.612709	0.130529	-4.69403	2.67874e-06	3.36523e-05	Slc25a36
ENSMUSG00000029174	925.331	-0.61075	0.0910046	-6.7112	1.93028e-11	5.54616e-10	Tbc1d1
ENSMUSG00000030096	1691.05	-0.60973	0.0782285	-7.79422	6.48082e-15	2.77957e-13	Slc6a6
ENSMUSG00000044224	1045.73	-0.60944	0.103619	-5.88153	4.06481e-09	8.71682e-08	Dnajc21
ENSMUSG00000050271	87.5859	-0.608441	0.229484	-2.65135	0.00801709	0.0355453	Prag1
ENSMUSG00000021482	188.104	-0.607348	0.176981	-3.43171	0.000599792	0.00412894	Prxl2c
ENSMUSG00000043154	99.4442	-0.606615	0.221211	-2.74224	0.00610213	0.0283842	Ppp2r3a
ENSMUSG00000028587	316.057	-0.605043	0.145645	-4.15422	3.26399e-05	0.000320511	Orc1
ENSMUSG00000053289	937.063	-0.604915	0.0934804	-6.47104	9.73333e-11	2.59868e-09	Ddx10
ENSMUSG00000079429	158.269	-0.604761	0.172161	-3.51276	0.000443484	0.00319339	Mroh2a
ENSMUSG00000041235	798.242	-0.604716	0.100254	-6.03183	1.62114e-09	3.72634e-08	Chd7
ENSMUSG00000036737	2056.6	-0.60469	0.106542	-5.67563	1.38182e-08	2.68178e-07	Oxsr1
ENSMUSG00000034118	219.091	-0.603733	0.179932	-3.35534	0.00079267	0.00523853	Tpst1
ENSMUSG00000029204	659.408	-0.603251	0.103574	-5.82435	5.73352e-09	1.1947e-07	Rhoh
ENSMUSG00000058446	1496.9	-0.603122	0.0823624	-7.32278	2.42888e-13	8.88839e-12	Znrf2
ENSMUSG00000022139	433.405	-0.602872	0.114772	-5.25276	1.49835e-07	2.45674e-06	Mbnl2
ENSMUSG00000020396	1421.21	-0.602789	0.0865656	-6.96338	3.32213e-12	1.05783e-10	Nefh
ENSMUSG00000024143	310.173	-0.602671	0.131638	-4.57824	4.68901e-06	5.54948e-05	Rhoq
ENSMUSG00000029022	165.77	-0.601576	0.175771	-3.42249	0.0006205	0.00425152	Miip
ENSMUSG00000031349	361.651	-0.601413	0.153027	-3.9301	8.49091e-05	0.00074351	Nsdhl
ENSMUSG00000044468	639.017	-0.601238	0.25968	-2.31531	0.0205961	0.0751649	Tent5c
ENSMUSG00000069874	847.16	-0.600956	0.106471	-5.64434	1.65821e-08	3.18458e-07	Irgm2
ENSMUSG00000062198	64.2841	-0.600711	0.268789	-2.23488	0.0254252	0.088528	2700097O09Rik
ENSMUSG00000020484	1366.89	-0.600648	0.101542	-5.91529	3.31286e-09	7.24153e-08	Xbp1
ENSMUSG00000005718	306.622	-0.600349	0.131874	-4.55246	5.30231e-06	6.20543e-05	Tfap4
ENSMUSG00000025558	176.627	-0.599592	0.174912	-3.42796	0.000608133	0.00417463	Dock9
ENSMUSG00000040321	234.343	-0.597351	0.162194	-3.68295	0.000230554	0.0018089	Zfp770
ENSMUSG00000100927	112.466	-0.59667	0.202543	-2.94589	0.00322026	0.0170193	NA
ENSMUSG00000045817	3284.39	-0.596208	0.0717044	-8.31481	9.18977e-17	4.62982e-15	Zfp36l2
ENSMUSG00000054293	96.6619	-0.596122	0.24528	-2.43038	0.015083	0.0592014	P2ry10b
ENSMUSG00000054387	551.892	-0.595809	0.108676	-5.48244	4.19511e-08	7.51696e-07	Mdm4
ENSMUSG00000033400	149.424	-0.595664	0.193479	-3.0787	0.00207903	0.0116959	Agl
ENSMUSG00000040236	607.178	-0.59454	0.100579	-5.91116	3.39697e-09	7.40338e-08	Trappc5
ENSMUSG00000029422	785.495	-0.594364	0.103547	-5.74002	9.4663e-09	1.89985e-07	Rsrc2
ENSMUSG00000043004	419.508	-0.593412	0.140313	-4.2292	2.34521e-05	0.000237429	Gng2
ENSMUSG00000070305	601.712	-0.592444	0.124137	-4.7725	1.81949e-06	2.4049e-05	Mpzl3
ENSMUSG00000024399	3193.18	-0.590414	0.111068	-5.31577	1.06205e-07	1.7815e-06	Ltb
ENSMUSG00000054364	75.3891	-0.589212	0.273323	-2.15574	0.0311043	0.102504	Rhob
ENSMUSG00000078570	437.719	-0.588806	0.114843	-5.12705	2.94311e-07	4.51943e-06	1110065P20Rik
ENSMUSG00000051510	573.277	-0.588804	0.105498	-5.58118	2.3889e-08	4.49401e-07	Mafg
ENSMUSG00000045409	132.879	-0.588051	0.198151	-2.96769	0.00300047	0.0160101	Trim39
ENSMUSG00000024962	110.035	-0.587672	0.217824	-2.69793	0.00697727	0.0316994	Vegfb
ENSMUSG00000025283	799.488	-0.587261	0.125827	-4.66721	3.05316e-06	3.7871e-05	Sat1
ENSMUSG00000022194	119.193	-0.586272	0.194214	-3.01869	0.00253867	0.0138981	Bcl2l2
ENSMUSG00000022194	119.193	-0.586272	0.194214	-3.01869	0.00253867	0.0138981	Pabpn1
ENSMUSG00000050549	297.546	-0.586081	0.151419	-3.8706	0.000108566	0.000926685	Fam241a
ENSMUSG00000037965	299.335	-0.584966	0.150648	-3.883	0.000103176	0.000885542	Zc3h7a
ENSMUSG00000023393	92.7133	-0.583005	0.227544	-2.56217	0.0104021	0.0439855	Slc17a9
ENSMUSG00000085714	107.635	-0.582784	0.211892	-2.75038	0.00595263	0.0278617	NA
ENSMUSG00000019971	78.3087	-0.582739	0.257625	-2.26197	0.0236993	0.0837274	Cep290
ENSMUSG00000106086	216.694	-0.581037	0.153925	-3.7748	0.000160134	0.00131385	NA
ENSMUSG00000078763	202.889	-0.580002	0.173134	-3.35001	0.000808089	0.00532131	Slfn1
ENSMUSG00000026857	245.995	-0.579504	0.146478	-3.95626	7.61332e-05	0.000677963	Ntmt1
ENSMUSG00000028842	137.636	-0.578702	0.2245	-2.57774	0.00994479	0.0423683	Ago3
ENSMUSG00000032322	487.271	-0.578293	0.119523	-4.83834	1.30929e-06	1.78012e-05	Pstpip1
ENSMUSG00000032525	863.393	-0.57653	0.105483	-5.46563	4.61273e-08	8.19539e-07	Nktr
ENSMUSG00000086600	121.755	-0.575451	0.226136	-2.54472	0.0109366	0.0458633	NA
ENSMUSG00000031974	92.0184	-0.574981	0.223137	-2.57681	0.00997171	0.0424461	Abcb10
ENSMUSG00000033623	427.716	-0.574764	0.114703	-5.0109	5.41767e-07	7.88322e-06	Pcgf3
ENSMUSG00000078695	250.986	-0.573736	0.170022	-3.37448	0.000739564	0.00494308	Cisd3
ENSMUSG00000068227	4742.29	-0.573055	0.0826253	-6.93559	4.04527e-12	1.26617e-10	Il2rb
ENSMUSG00000117393	287.406	-0.572952	0.134861	-4.24846	2.15245e-05	0.000220199	NA
ENSMUSG00000005897	89.7773	-0.572881	0.225841	-2.53666	0.0111917	0.0467331	Nr2c1
ENSMUSG00000030748	1971.03	-0.571456	0.0743932	-7.68156	1.57168e-14	6.54987e-13	Il4ra
ENSMUSG00000049230	63.9703	-0.570503	0.271086	-2.10451	0.0353338	0.112901	Myef2l
ENSMUSG00000048997	108.31	-0.570495	0.220573	-2.58642	0.009698	0.0415092	Atxn7l2
ENSMUSG00000045763	123.784	-0.570285	0.24288	-2.34801	0.0188739	0.0703277	Basp1
ENSMUSG00000030421	1021.92	-0.57013	0.0890121	-6.40508	1.50289e-10	3.9131e-09	Uri1
ENSMUSG00000031441	754.837	-0.569779	0.112624	-5.0591	4.21237e-07	6.27208e-06	Atp11a
ENSMUSG00000016239	105.071	-0.568256	0.219331	-2.59086	0.00957364	0.0411085	Lonrf3
ENSMUSG00000037773	138.487	-0.566251	0.183921	-3.07877	0.00207857	0.0116959	Pced1a
ENSMUSG00000034560	385.339	-0.565751	0.121758	-4.64652	3.37574e-06	4.14529e-05	Washc4
ENSMUSG00000029201	796.548	-0.56406	0.0944727	-5.97061	2.36364e-09	5.28443e-08	Ugdh
ENSMUSG00000048534	432.157	-0.563706	0.13923	-4.04874	5.14945e-05	0.00048067	Jaml
ENSMUSG00000042225	652.688	-0.563216	0.103293	-5.45258	4.9644e-08	8.77781e-07	Ammecr1
ENSMUSG00000022769	955.214	-0.562457	0.100267	-5.60957	2.02834e-08	3.85516e-07	Sdf2l1
ENSMUSG00000076435	60.6191	-0.56245	0.276573	-2.03364	0.0419882	0.129008	Acsf2
ENSMUSG00000092416	251.982	-0.562319	0.140539	-4.00117	6.30296e-05	0.000574491	Zfp141
ENSMUSG00000021678	59.3232	-0.561675	0.27801	-2.02034	0.0433482	0.132055	F2rl1
ENSMUSG00000051403	172.411	-0.561049	0.180648	-3.10575	0.00189796	0.0108304	Ppp1r37
ENSMUSG00000064179	70.1431	-0.561013	0.26753	-2.09701	0.0359931	0.11461	Tnnt1
ENSMUSG00000027076	287.09	-0.56058	0.142455	-3.93514	8.31483e-05	0.000730182	Timm10
ENSMUSG00000025921	108.402	-0.559905	0.212914	-2.62973	0.00854524	0.0374022	Rdh10
ENSMUSG00000071552	641.897	-0.559869	0.120584	-4.64299	3.43397e-06	4.21327e-05	Tigit
ENSMUSG00000039958	67.02	-0.559769	0.266779	-2.09825	0.0358834	0.114334	Etfbkmt
ENSMUSG00000038128	482.411	-0.559607	0.113408	-4.93446	8.03729e-07	1.12499e-05	Camk4
ENSMUSG00000001473	136.648	-0.559519	0.227043	-2.46438	0.0137252	0.0549732	Tubb6
ENSMUSG00000021431	213.824	-0.558522	0.156308	-3.57322	0.000352621	0.00261199	Snrnp48
ENSMUSG00000028248	331.283	-0.558086	0.137247	-4.06629	4.77672e-05	0.000449586	Pnisr
ENSMUSG00000021298	291.869	-0.557767	0.142774	-3.90665	9.3585e-05	0.000811751	Gpr132
ENSMUSG00000056411	195.314	-0.557522	0.171916	-3.243	0.0011828	0.00731757	Gm12500
ENSMUSG00000044447	76.1477	-0.556909	0.252839	-2.20262	0.0276213	0.0938346	Dock5
ENSMUSG00000021357	2361.19	-0.55614	0.090352	-6.15526	7.49543e-10	1.78423e-08	Exoc2
ENSMUSG00000020523	483.572	-0.556138	0.114232	-4.86851	1.1244e-06	1.5459e-05	Fam114a2
ENSMUSG00000032249	6977.18	-0.556056	0.0677845	-8.20329	2.33887e-16	1.13931e-14	Anp32a
ENSMUSG00000001313	83.6365	-0.555515	0.273566	-2.03064	0.0422915	0.129669	Rnd2
ENSMUSG00000039985	721.888	-0.555418	0.095968	-5.78753	7.14307e-09	1.47136e-07	Sinhcaf
ENSMUSG00000085156	102.809	-0.554792	0.226353	-2.45101	0.0142458	0.056671	Snhg15
ENSMUSG00000021767	166.806	-0.554723	0.168815	-3.28598	0.00101627	0.006433	Kat6b
ENSMUSG00000070934	884.636	-0.554567	0.0949818	-5.83867	5.26201e-09	1.10427e-07	Rraga
ENSMUSG00000117757	156.421	-0.554534	0.178097	-3.11366	0.0018478	0.0106018	NA
ENSMUSG00000026289	267.701	-0.554399	0.15075	-3.6776	0.00023544	0.00184249	Atg16l1
ENSMUSG00000034266	270.837	-0.554046	0.139081	-3.98364	6.78684e-05	0.000611998	Batf
ENSMUSG00000117679	67.0084	-0.55399	0.263984	-2.09857	0.0358546	0.11429	Apbb3
ENSMUSG00000034163	431.85	-0.553654	0.130258	-4.25043	2.13356e-05	0.000218876	Zfc3h1
ENSMUSG00000044149	397.771	-0.552763	0.119968	-4.6076	4.07337e-06	4.88771e-05	Nkrf
ENSMUSG00000045382	95.8364	-0.552446	0.230175	-2.40012	0.0163899	0.0632104	Cxcr4
ENSMUSG00000018930	801.577	-0.55194	0.139277	-3.96291	7.40422e-05	0.000661345	Ccl4
ENSMUSG00000032373	117.235	-0.550772	0.218244	-2.52365	0.0116142	0.0481286	Car12
ENSMUSG00000024137	134.451	-0.550417	0.215963	-2.54867	0.0108135	0.0454376	E4f1
ENSMUSG00000029552	1954.61	-0.550267	0.0832469	-6.61007	3.84148e-11	1.06626e-09	Tes
ENSMUSG00000026975	124.228	-0.549583	0.200824	-2.73664	0.00620694	0.0288045	Dph7
ENSMUSG00000021595	5281.12	-0.548568	0.0660519	-8.3051	9.97377e-17	5.00765e-15	Nsun2
ENSMUSG00000020777	432.446	-0.54805	0.136179	-4.02449	5.7099e-05	0.000527297	Acox1
ENSMUSG00000026034	529.242	-0.547847	0.10992	-4.98406	6.22648e-07	8.92766e-06	Clk1
ENSMUSG00000032515	932.458	-0.547162	0.0954437	-5.73283	9.87693e-09	1.96883e-07	Csrnp1
ENSMUSG00000042606	1057	-0.546942	0.0851303	-6.42476	1.32075e-10	3.45723e-09	Hirip3
ENSMUSG00000022280	1433.67	-0.54636	0.0878651	-6.21816	5.03007e-10	1.23124e-08	Rnf19a
ENSMUSG00000092482	834.474	-0.545815	0.0989873	-5.51399	3.50796e-08	6.37894e-07	NA
ENSMUSG00000028494	114.482	-0.545179	0.214348	-2.54343	0.0109771	0.0459936	Plin2
ENSMUSG00000026009	1803.52	-0.544117	0.0944035	-5.76374	8.22707e-09	1.67166e-07	Icos
ENSMUSG00000058755	116.653	-0.543927	0.215892	-2.51944	0.0117543	0.048586	Osm
ENSMUSG00000038538	533.866	-0.543775	0.124036	-4.384	1.16519e-05	0.000126932	Ubn2
ENSMUSG00000023206	138.696	-0.542812	0.19306	-2.81162	0.0049292	0.0241069	Il15ra
ENSMUSG00000031924	2691.55	-0.542259	0.0693168	-7.82291	5.16163e-15	2.2399e-13	Cyb5b
ENSMUSG00000020402	4136.06	-0.542094	0.069685	-7.7792	7.29826e-15	3.11202e-13	Vdac1
ENSMUSG00000113204	102.62	-0.541855	0.215601	-2.51323	0.011963	0.049241	Gm46430
ENSMUSG00000020917	5125.65	-0.541609	0.0650432	-8.32691	8.29794e-17	4.23858e-15	Acly
ENSMUSG00000047141	411.138	-0.541004	0.118406	-4.56908	4.89879e-06	5.77453e-05	Zfp654
ENSMUSG00000000753	91.1875	-0.540529	0.229015	-2.36023	0.0182635	0.068662	Serpinf1
ENSMUSG00000115681	146.065	-0.539828	0.177928	-3.03396	0.00241363	0.0133334	NA
ENSMUSG00000043262	90.5474	-0.539491	0.220383	-2.44797	0.0143663	0.057089	Uevld
ENSMUSG00000020897	1690.38	-0.539413	0.0798643	-6.75412	1.43704e-11	4.23652e-10	Aurkb
ENSMUSG00000018042	846.291	-0.538865	0.0932092	-5.78124	7.41502e-09	1.51925e-07	Cyb5r3
ENSMUSG00000038256	516.847	-0.53708	0.112918	-4.75636	1.97118e-06	2.5845e-05	Bcl9
ENSMUSG00000047221	232.9	-0.536042	0.152017	-3.5262	0.000421563	0.00305348	Fam185a
ENSMUSG00000026277	379.365	-0.535863	0.120943	-4.4307	9.39273e-06	0.000105317	Stk25
ENSMUSG00000003534	541.928	-0.53578	0.149585	-3.58177	0.000341269	0.00254149	Ddr1
ENSMUSG00000063362	241.61	-0.53562	0.148841	-3.59861	0.000319921	0.00240243	Alg11
ENSMUSG00000085023	514.561	-0.535451	0.113133	-4.73292	2.21313e-06	2.86618e-05	NA
ENSMUSG00000055334	168.147	-0.535128	0.176497	-3.03194	0.00242991	0.0134032	Snupn
ENSMUSG00000032621	748.843	-0.535062	0.0960568	-5.57027	2.54341e-08	4.77246e-07	Srek1
ENSMUSG00000024851	294.851	-0.534739	0.135457	-3.94765	7.89211e-05	0.000700246	Pitpnm1
ENSMUSG00000037936	649.003	-0.534377	0.100699	-5.30666	1.1165e-07	1.86011e-06	Scarb1
ENSMUSG00000050350	335.303	-0.533354	0.147553	-3.61467	0.000300734	0.00227577	Gpr18
ENSMUSG00000022710	2817.34	-0.531083	0.0681156	-7.79679	6.35024e-15	2.73153e-13	Usp7
ENSMUSG00000045671	733.84	-0.530903	0.0961696	-5.52049	3.3806e-08	6.16259e-07	Spred2
ENSMUSG00000022389	159.087	-0.53083	0.189591	-2.79987	0.00511236	0.0247151	Tef
ENSMUSG00000084968	110.205	-0.530462	0.203672	-2.60449	0.00920118	0.039796	NA
ENSMUSG00000033294	1269.07	-0.529964	0.0819237	-6.469	9.86536e-11	2.62915e-09	Noc4l
ENSMUSG00000036057	467.594	-0.529233	0.113038	-4.68191	2.84216e-06	3.55233e-05	Ptpn23
ENSMUSG00000064145	647.695	-0.529201	0.0966928	-5.47302	4.42427e-08	7.88914e-07	Arih2
ENSMUSG00000030291	295.726	-0.529116	0.139445	-3.79445	0.000147973	0.00122156	Med21
ENSMUSG00000078713	1007.24	-0.52897	0.0905975	-5.83868	5.26167e-09	1.10427e-07	Tomm5
ENSMUSG00000064215	146.882	-0.528191	0.190199	-2.77705	0.00548554	0.0261553	Ifi27
ENSMUSG00000024222	891.566	-0.527268	0.108399	-4.86413	1.14962e-06	1.57467e-05	Fkbp5
ENSMUSG00000075040	116.874	-0.527024	0.209558	-2.51493	0.0119056	0.0490598	Zfp408
ENSMUSG00000079316	278.521	-0.52502	0.143848	-3.64982	0.000262421	0.00202013	Rab9
ENSMUSG00000079036	189.944	-0.524459	0.165676	-3.16556	0.00154785	0.00915209	Alkbh1
ENSMUSG00000079036	189.944	-0.524459	0.165676	-3.16556	0.00154785	0.00915209	Nrp
ENSMUSG00000035545	336.855	-0.524167	0.126181	-4.15409	3.2659e-05	0.000320511	Leng8
ENSMUSG00000028826	296.001	-0.523775	0.137678	-3.80435	0.000142178	0.00117968	Maco1
ENSMUSG00000034926	2944.17	-0.523769	0.0667254	-7.84962	4.17307e-15	1.82166e-13	Dhcr24
ENSMUSG00000035900	612.503	-0.523416	0.105738	-4.95014	7.41614e-07	1.05004e-05	Gramd4
ENSMUSG00000025332	2459.47	-0.523224	0.0749653	-6.97955	2.96124e-12	9.57424e-11	Kdm5c
ENSMUSG00000019796	83.2535	-0.523134	0.232904	-2.24614	0.0246952	0.0865186	Lrp11
ENSMUSG00000111639	88.8695	-0.52216	0.239195	-2.18299	0.0290367	0.097614	NA
ENSMUSG00000022637	2291.39	-0.521362	0.108511	-4.8047	1.54983e-06	2.07836e-05	Cblb
ENSMUSG00000060675	857.294	-0.521077	0.100619	-5.17873	2.23403e-07	3.54147e-06	Plaat3
ENSMUSG00000057561	1751.82	-0.518945	0.0851442	-6.09489	1.09513e-09	2.55721e-08	Eif1a
ENSMUSG00000004100	712.626	-0.516636	0.10008	-5.16223	2.44022e-07	3.83839e-06	Ppan
ENSMUSG00000038344	173.481	-0.516486	0.175139	-2.94901	0.0031879	0.0168695	Txlng
ENSMUSG00000051721	137.89	-0.516108	0.192942	-2.67493	0.00747441	0.0335909	Wdcp
ENSMUSG00000023980	299.201	-0.515811	0.132218	-3.90123	9.5707e-05	0.000828203	Taf8
ENSMUSG00000087700	757.538	-0.515774	0.108019	-4.77485	1.79843e-06	2.38348e-05	NA
ENSMUSG00000120837	65.2546	-0.515053	0.260115	-1.98009	0.047693	0.142488	NA
ENSMUSG00000055491	1649.84	-0.513767	0.074408	-6.90472	5.03014e-12	1.54485e-10	Pprc1
ENSMUSG00000017386	1096.65	-0.512958	0.0947866	-5.41172	6.2423e-08	1.08933e-06	Traf4
ENSMUSG00000026955	222.102	-0.512823	0.156039	-3.2865	0.00101439	0.00642667	Sapcd2
ENSMUSG00000052707	1120.87	-0.512702	0.093085	-5.50789	3.63155e-08	6.5631e-07	Tnrc6a
ENSMUSG00000049047	105.284	-0.512476	0.222199	-2.30638	0.0210895	0.0764345	Armcx3
ENSMUSG00000068917	304.882	-0.512001	0.131091	-3.90569	9.39577e-05	0.000813545	Clk2
ENSMUSG00000035614	392.86	-0.510222	0.124917	-4.0845	4.41722e-05	0.000419675	Togaram1
ENSMUSG00000024258	1112.66	-0.50981	0.0866999	-5.88017	4.0985e-09	8.76352e-08	Polr2d
ENSMUSG00000021275	154.469	-0.509029	0.194093	-2.62261	0.00872598	0.0381027	Tecpr2
ENSMUSG00000015335	74.0097	-0.508969	0.248209	-2.05057	0.0403089	0.12497	Zdhhc12
ENSMUSG00000106696	151.245	-0.508808	0.18545	-2.74364	0.00607615	0.0283094	NA
ENSMUSG00000034157	348.094	-0.508104	0.125985	-4.03306	5.50541e-05	0.000510656	Cipc
ENSMUSG00000064262	523.141	-0.507557	0.109135	-4.65074	3.30751e-06	4.07511e-05	Gimap8
ENSMUSG00000079363	1360.11	-0.506877	0.105173	-4.81946	1.43947e-06	1.94097e-05	Gbp4
ENSMUSG00000110256	382.933	-0.506535	0.118118	-4.28837	1.7999e-05	0.000187126	NA
ENSMUSG00000042570	153.024	-0.506421	0.188621	-2.68487	0.00725582	0.0327424	Mier2
ENSMUSG00000078651	101.367	-0.50548	0.221109	-2.28611	0.0222477	0.0797091	Aoc2
ENSMUSG00000030512	637.78	-0.505422	0.106163	-4.76082	1.92811e-06	2.53028e-05	Snrpa1
ENSMUSG00000106698	256.64	-0.505312	0.155898	-3.2413	0.00118985	0.00735256	NA
ENSMUSG00000024219	541.218	-0.505276	0.110222	-4.58418	4.55779e-06	5.41597e-05	Anks1
ENSMUSG00000048007	334.982	-0.505244	0.124241	-4.06664	4.76963e-05	0.000449206	Timm8a1
ENSMUSG00000108738	78.8696	-0.505025	0.240041	-2.10392	0.0353858	0.112969	NA
ENSMUSG00000045867	167.997	-0.505023	0.180996	-2.79024	0.0052669	0.0253207	Cradd
ENSMUSG00000103041	145.53	-0.504909	0.184496	-2.73669	0.00620605	0.0288045	NA
ENSMUSG00000001569	720.739	-0.504085	0.106825	-4.71881	2.37227e-06	3.03994e-05	Nom1
ENSMUSG00000029402	188.266	-0.50287	0.168517	-2.98409	0.00284423	0.0152958	Snrnp35
ENSMUSG00000039774	169.763	-0.501663	0.174491	-2.875	0.00404025	0.0205519	Galnt12
ENSMUSG00000090946	381.991	-0.501438	0.123379	-4.06421	4.81947e-05	0.000452741	Ccdc71l
ENSMUSG00000024539	626.854	-0.500642	0.106519	-4.70001	2.60146e-06	3.28216e-05	Ptpn2
ENSMUSG00000003308	1095.32	-0.500231	0.0893373	-5.59936	2.1515e-08	4.08396e-07	Keap1
ENSMUSG00000033961	77.3792	-0.4998	0.24333	-2.054	0.0399756	0.124146	Zfp446
ENSMUSG00000028179	215.977	-0.499746	0.214704	-2.3276	0.0199332	0.0734377	Cth
ENSMUSG00000055675	4168.2	-0.499588	0.182038	-2.74443	0.00606169	0.0282642	Kbtbd11
ENSMUSG00000067212	3047.38	-0.499586	0.0963657	-5.18427	2.1686e-07	3.44889e-06	H2-T23
ENSMUSG00000059866	210.673	-0.499478	0.169328	-2.94976	0.00318021	0.016853	Tnip2
ENSMUSG00000032000	810.632	-0.498509	0.0915299	-5.4464	5.13983e-08	9.0662e-07	Birc3
ENSMUSG00000031605	380.818	-0.498013	0.125544	-3.96685	7.28302e-05	0.000652102	Klhl2
ENSMUSG00000074305	677.072	-0.497386	0.118092	-4.21185	2.53282e-05	0.000252784	Peak1
ENSMUSG00000024045	1130.23	-0.497322	0.0821658	-6.05266	1.42475e-09	3.30071e-08	Akap8
ENSMUSG00000026694	674.154	-0.497052	0.108455	-4.58304	4.58254e-06	5.4366e-05	Mettl13
ENSMUSG00000026082	228.802	-0.496535	0.153228	-3.2405	0.00119318	0.0073659	Rev1
ENSMUSG00000027994	140.155	-0.494635	0.227625	-2.17303	0.0297784	0.0994031	Mcub
ENSMUSG00000034748	207.434	-0.494226	0.163749	-3.0182	0.00254281	0.0139061	Sirt6
ENSMUSG00000047446	147.728	-0.493904	0.192057	-2.57166	0.0101213	0.0430207	Arl4a
ENSMUSG00000031292	82.0638	-0.4937	0.238063	-2.07382	0.0380962	0.119648	Cdkl5
ENSMUSG00000040675	2406.87	-0.493679	0.0707908	-6.97378	3.08538e-12	9.95373e-11	Mthfd1l
ENSMUSG00000049658	1022.72	-0.493621	0.121203	-4.07269	4.64739e-05	0.000438817	Bdp1
ENSMUSG00000003808	1028.65	-0.493544	0.09778	-5.04749	4.47643e-07	6.63576e-06	Farsa
ENSMUSG00000028433	2932.77	-0.492717	0.086312	-5.70856	1.13936e-08	2.23779e-07	Ubap2
ENSMUSG00000028894	1391.02	-0.492427	0.0787555	-6.2526	4.03674e-10	9.99739e-09	Inpp5b
ENSMUSG00000037649	217.334	-0.491466	0.167526	-2.93366	0.00334986	0.0175811	H2-DMa
ENSMUSG00000018537	96.2483	-0.491266	0.223893	-2.1942	0.0282208	0.0954384	Pcgf2
ENSMUSG00000040943	460.655	-0.491264	0.149147	-3.29382	0.000988372	0.00629434	Tet2
ENSMUSG00000035953	1356.44	-0.490276	0.0855991	-5.72759	1.01867e-08	2.02509e-07	Pip4p1
ENSMUSG00000046711	2074.37	-0.490222	0.0892509	-5.49263	3.95998e-08	7.12166e-07	Hmga1
ENSMUSG00000085166	192.214	-0.489395	0.168741	-2.90026	0.00372851	0.0192069	Gm15522
ENSMUSG00000037876	576.081	-0.488503	0.107493	-4.54449	5.50693e-06	6.42446e-05	Jmjd1c
ENSMUSG00000021690	308.218	-0.488448	0.12922	-3.77997	0.000156847	0.00128904	Jmy
ENSMUSG00000052031	94.1658	-0.487901	0.230933	-2.11274	0.0346228	0.111136	Tagap1
ENSMUSG00000033767	1045.08	-0.487539	0.0861368	-5.66005	1.51325e-08	2.92144e-07	Tmem131l
ENSMUSG00000064023	163.874	-0.487087	0.168119	-2.89728	0.00376418	0.0193551	Klk8
ENSMUSG00000033669	97.8552	-0.486957	0.218073	-2.23301	0.0255486	0.0888154	Zfp7
ENSMUSG00000022974	392.694	-0.486635	0.139651	-3.48464	0.000492801	0.00348874	Paxbp1
ENSMUSG00000020564	420.935	-0.486514	0.12209	-3.98489	6.75125e-05	0.000609311	Atxn7l1
ENSMUSG00000036432	520.704	-0.485343	0.117205	-4.14099	3.45815e-05	0.000337353	Siah2
ENSMUSG00000036721	150.36	-0.485295	0.188872	-2.56944	0.0101862	0.0432464	Zscan12
ENSMUSG00000004266	3398.83	-0.485257	0.0809206	-5.9967	2.01363e-09	4.56434e-08	Ptpn6
ENSMUSG00000025809	3767.29	-0.483702	0.0663895	-7.28582	3.19729e-13	1.1585e-11	Itgb1
ENSMUSG00000029033	163.017	-0.483597	0.181975	-2.6575	0.00787227	0.0350111	Acap3
ENSMUSG00000041974	368.03	-0.483555	0.144454	-3.34748	0.00081551	0.00536058	Spidr
ENSMUSG00000032267	163.498	-0.482805	0.176935	-2.72871	0.00635829	0.0293864	Usp28
ENSMUSG00000068394	178.817	-0.482673	0.167193	-2.88693	0.00389024	0.019892	Cep152
ENSMUSG00000036990	1312.69	-0.482568	0.103146	-4.67848	2.89006e-06	3.60875e-05	Otud4
ENSMUSG00000026867	2276.52	-0.482446	0.0808771	-5.96517	2.4438e-09	5.45535e-08	Gapvd1
ENSMUSG00000047649	377.299	-0.48208	0.126618	-3.80734	0.000140467	0.00116644	Polr1g
ENSMUSG00000028228	905.948	-0.480852	0.0918362	-5.23598	1.64115e-07	2.66478e-06	Cpne3
ENSMUSG00000097493	142.098	-0.480406	0.209441	-2.29375	0.021805	0.0784478	NA
ENSMUSG00000038502	157.114	-0.480277	0.171869	-2.79443	0.00519914	0.0250441	Ptov1
ENSMUSG00000022253	494.531	-0.4802	0.114395	-4.19772	2.6962e-05	0.000267817	Nadk2
ENSMUSG00000120971	167.135	-0.480028	0.173109	-2.77298	0.00555458	0.0264037	NA
ENSMUSG00000008200	691.543	-0.479634	0.103757	-4.62265	3.78872e-06	4.59487e-05	Fnbp4
ENSMUSG00000040433	228.641	-0.479631	0.158201	-3.03179	0.0024311	0.0134047	Zbtb38
ENSMUSG00000021514	103.859	-0.479598	0.213514	-2.24621	0.0246905	0.0865186	Zfp369
ENSMUSG00000036941	119.181	-0.479462	0.208518	-2.29938	0.0214836	0.0775761	Elac1
ENSMUSG00000054556	447.205	-0.478616	0.121205	-3.9488	7.85423e-05	0.000697727	Gm4876
ENSMUSG00000058258	1566.85	-0.478488	0.0905521	-5.28412	1.2631e-07	2.08781e-06	Idi1
ENSMUSG00000098134	184.648	-0.47835	0.172567	-2.77197	0.00557188	0.0264571	Rnf113a2
ENSMUSG00000001521	262.659	-0.478078	0.141609	-3.37603	0.000735392	0.00491744	Tulp3
ENSMUSG00000121036	535.537	-0.477066	0.112509	-4.24023	2.23293e-05	0.000227958	NA
ENSMUSG00000001053	139.563	-0.476725	0.1966	-2.42484	0.015315	0.0598243	N4bp3
ENSMUSG00000048911	229.784	-0.476027	0.167047	-2.84966	0.00437661	0.0219143	Rnf24
ENSMUSG00000013646	344.804	-0.474444	0.126329	-3.75561	0.000172923	0.00140857	Sh3bp5l
ENSMUSG00000059436	2579.24	-0.473751	0.0722616	-6.55605	5.52524e-11	1.51929e-09	Max
ENSMUSG00000050812	1600.28	-0.473618	0.0865231	-5.47388	4.40279e-08	7.86037e-07	Ecpas
ENSMUSG00000066571	451.027	-0.472819	0.129812	-3.64233	0.000270185	0.00207555	Garre1
ENSMUSG00000058587	2052.76	-0.472586	0.0736296	-6.41842	1.37698e-10	3.59801e-09	Tmod3
ENSMUSG00000026797	102.166	-0.472452	0.219128	-2.15605	0.0310797	0.102491	Stxbp1
ENSMUSG00000029725	286.245	-0.472241	0.140761	-3.35493	0.000793862	0.0052417	Ppp1r35
ENSMUSG00000024970	143.976	-0.472089	0.193846	-2.43537	0.0148765	0.0587037	Spindoc
ENSMUSG00000114797	712.907	-0.47132	0.0986549	-4.77747	1.77517e-06	2.3569e-05	Nup58
ENSMUSG00000031732	228.26	-0.471242	0.159118	-2.96158	0.00306067	0.01629	Phlpp2
ENSMUSG00000021670	3910.29	-0.471029	0.074389	-6.33197	2.42051e-10	6.16058e-09	Hmgcr
ENSMUSG00000108524	149.546	-0.470904	0.178058	-2.64467	0.00817703	0.0361673	NA
ENSMUSG00000079003	815.293	-0.469023	0.0909099	-5.15921	2.47997e-07	3.88292e-06	Samd1
ENSMUSG00000031101	1276.33	-0.46857	0.0879892	-5.32531	1.00779e-07	1.70604e-06	Sash3
ENSMUSG00000032059	419.83	-0.468271	0.122551	-3.82105	0.000132886	0.00110947	Alg9
ENSMUSG00000027936	522.599	-0.468165	0.104938	-4.46133	8.14514e-06	9.25276e-05	Crtc2
ENSMUSG00000102615	874.767	-0.46792	0.141645	-3.30347	0.000954954	0.00611703	NA
ENSMUSG00000001962	302.224	-0.467758	0.133117	-3.51389	0.000441588	0.00318129	Fam50a
ENSMUSG00000010097	1114.19	-0.467662	0.0836971	-5.58756	2.30285e-08	4.36001e-07	Nxf1
ENSMUSG00000024338	3585.76	-0.467318	0.10053	-4.64856	3.34267e-06	4.11498e-05	Psmb8
ENSMUSG00000035064	135.387	-0.46684	0.190415	-2.45169	0.0142185	0.0565933	Eef2k
ENSMUSG00000029635	843.401	-0.465965	0.0892489	-5.22096	1.77994e-07	2.87429e-06	Cdk8
ENSMUSG00000020048	6780.87	-0.465916	0.0589412	-7.90476	2.68456e-15	1.17888e-13	Hsp90b1
ENSMUSG00000030400	399.389	-0.465015	0.117139	-3.96977	7.1941e-05	0.000644927	Ercc2
ENSMUSG00000038608	1457.21	-0.464447	0.122285	-3.79808	0.000145822	0.00120584	Dock10
ENSMUSG00000026784	141.922	-0.463596	0.180491	-2.56853	0.0102131	0.0433232	Pdss1
ENSMUSG00000022095	138.886	-0.463301	0.191579	-2.41833	0.0155918	0.0606854	Fhip2b
ENSMUSG00000043439	1074.8	-0.462266	0.0886825	-5.21259	1.86218e-07	2.99721e-06	Epop
ENSMUSG00000030655	1352.03	-0.462167	0.128344	-3.60101	0.000316987	0.00238526	Smg1
ENSMUSG00000055436	2309.77	-0.46211	0.0720201	-6.4164	1.39533e-10	3.63947e-09	Srsf11
ENSMUSG00000055720	587.351	-0.461932	0.104517	-4.41969	9.88423e-06	0.000109998	Ubl7
ENSMUSG00000043535	3026.15	-0.461716	0.0878179	-5.25765	1.45906e-07	2.39824e-06	Setx
ENSMUSG00000041685	109.912	-0.461413	0.211722	-2.17933	0.0293068	0.0981861	Fcho2
ENSMUSG00000029404	466.422	-0.461303	0.122008	-3.78093	0.000156243	0.00128479	Arl6ip4
ENSMUSG00000022462	2181.01	-0.46108	0.0917849	-5.02349	5.07411e-07	7.43479e-06	Slc38a2
ENSMUSG00000041058	397.885	-0.461055	0.118824	-3.88014	0.000104396	0.000895266	Wwp1
ENSMUSG00000026816	613.327	-0.461011	0.105172	-4.38339	1.16846e-05	0.000127139	Gtf3c5
ENSMUSG00000030528	729.928	-0.460859	0.0964389	-4.77876	1.76377e-06	2.34389e-05	Blm
ENSMUSG00000015341	963.597	-0.459604	0.0929257	-4.94593	7.57809e-07	1.07091e-05	Golga7
ENSMUSG00000015341	963.597	-0.459604	0.0929257	-4.94593	7.57809e-07	1.07091e-05	Gm6829
ENSMUSG00000030980	1022.97	-0.459356	0.0882143	-5.20728	1.91631e-07	3.07425e-06	Knop1
ENSMUSG00000097006	117.419	-0.459247	0.206086	-2.22843	0.0258518	0.0895471	9530082P21Rik
ENSMUSG00000031246	1485.02	-0.458843	0.0837423	-5.47924	4.27168e-08	7.63557e-07	Sh3bgrl
ENSMUSG00000025949	365.31	-0.458614	0.127368	-3.60069	0.000317374	0.00238696	Pikfyve
ENSMUSG00000028423	1443.19	-0.458032	0.0820528	-5.58216	2.37555e-08	4.48035e-07	Nfx1
ENSMUSG00000028078	115.654	-0.457356	0.208569	-2.19283	0.0283199	0.0956779	Dclk2
ENSMUSG00000020232	190.997	-0.456881	0.160224	-2.85151	0.00435119	0.0218168	Hmg20b
ENSMUSG00000027506	602.795	-0.456848	0.106108	-4.30549	1.66618e-05	0.00017483	Tpd52
ENSMUSG00000099708	262.471	-0.456768	0.14489	-3.15253	0.00161864	0.00950193	NA
ENSMUSG00000029823	2898.4	-0.45669	0.0676864	-6.74715	1.50779e-11	4.41855e-10	Luc7l2
ENSMUSG00000033031	796.809	-0.456595	0.0948061	-4.81609	1.46395e-06	1.96858e-05	Cip2a
ENSMUSG00000030688	107.515	-0.45649	0.209296	-2.18107	0.0291781	0.0979775	Stard10
ENSMUSG00000042997	137.395	-0.456362	0.189984	-2.4021	0.0163011	0.0629574	Nhlrc3
ENSMUSG00000031433	109.215	-0.456166	0.203239	-2.24448	0.0248016	0.0868499	Rbm41
ENSMUSG00000022792	412.483	-0.455902	0.132032	-3.45296	0.000554467	0.0038439	Yars2
ENSMUSG00000026994	105.34	-0.455038	0.222828	-2.0421	0.0411416	0.127043	Galnt3
ENSMUSG00000092134	117.996	-0.454825	0.198909	-2.2866	0.0222192	0.079643	Gm17089
ENSMUSG00000027677	381.362	-0.454669	0.121411	-3.74488	0.000180483	0.00145723	Ttc14
ENSMUSG00000021365	1233.73	-0.454321	0.0857723	-5.29682	1.17834e-07	1.9565e-06	Nedd9
ENSMUSG00000049916	118.103	-0.453675	0.203978	-2.22414	0.026139	0.0903291	2610318N02Rik
ENSMUSG00000092550	2563.01	-0.453616	0.103665	-4.37581	1.20984e-05	0.000131157	NA
ENSMUSG00000079523	10650.8	-0.453039	0.0734936	-6.16433	7.07821e-10	1.69313e-08	Tmsb10
ENSMUSG00000057963	235.736	-0.452704	0.158782	-2.8511	0.00435686	0.0218377	Itpk1
ENSMUSG00000097820	235.518	-0.452607	0.171633	-2.63706	0.0083627	0.0367825	NA
ENSMUSG00000038437	1710.96	-0.452577	0.0769149	-5.88412	4.00168e-09	8.59396e-08	Mllt6
ENSMUSG00000036985	193.722	-0.452562	0.157231	-2.87832	0.00399805	0.0203654	Zdhhc9
ENSMUSG00000032724	972.003	-0.45202	0.113371	-3.98709	6.68891e-05	0.000605169	Abtb2
ENSMUSG00000087066	96.2112	-0.451427	0.213522	-2.1142	0.0344981	0.110905	NA
ENSMUSG00000024525	517.681	-0.450769	0.110084	-4.09476	4.22597e-05	0.000403952	Impa2
ENSMUSG00000039936	3814.95	-0.449911	0.101082	-4.45095	8.54904e-06	9.68167e-05	Pik3cd
ENSMUSG00000038371	119.08	-0.449768	0.209958	-2.14218	0.0321792	0.105291	Sbf2
ENSMUSG00000009535	652.61	-0.448721	0.10033	-4.47245	7.73277e-06	8.81835e-05	Rnmt
ENSMUSG00000021270	20728.7	-0.448669	0.0689841	-6.50394	7.82448e-11	2.12373e-09	Hsp90aa1
ENSMUSG00000038563	554.574	-0.448448	0.106019	-4.22989	2.33807e-05	0.000236882	Efl1
ENSMUSG00000097439	447.5	-0.447933	0.119651	-3.74367	0.000181355	0.00146348	NA
ENSMUSG00000022353	275.609	-0.447561	0.184269	-2.42885	0.0151468	0.0593992	Mtss1
ENSMUSG00000016181	719.485	-0.445419	0.094536	-4.71164	2.45732e-06	3.13799e-05	Utp25
ENSMUSG00000030733	343.886	-0.445342	0.133327	-3.34021	0.000837142	0.00548317	Sh2b1
ENSMUSG00000003847	1694.62	-0.445216	0.217924	-2.04299	0.0410535	0.126878	Nfat5
ENSMUSG00000027620	2740.49	-0.445109	0.0679313	-6.55234	5.66421e-11	1.55459e-09	Rbm39
ENSMUSG00000035293	637.174	-0.444955	0.10237	-4.34654	1.38302e-05	0.000147969	G2e3
ENSMUSG00000097675	181.159	-0.444805	0.194416	-2.28791	0.0221429	0.0794533	1700101I11Rik
ENSMUSG00000024335	3295.43	-0.444767	0.0716785	-6.20502	5.46888e-10	1.3298e-08	Brd2
ENSMUSG00000071533	1500.03	-0.44474	0.0832217	-5.34404	9.08967e-08	1.54946e-06	Pcnp
ENSMUSG00000017861	985.045	-0.44473	0.0890794	-4.99251	5.95982e-07	8.59558e-06	Mybl2
ENSMUSG00000025050	264.155	-0.444458	0.138449	-3.21027	0.00132609	0.00803793	Pcgf6
ENSMUSG00000022992	627.917	-0.444273	0.100445	-4.42306	9.73148e-06	0.000108701	Kansl2
ENSMUSG00000044250	398.777	-0.443862	0.118616	-3.74199	0.000182569	0.00147157	Pced1b
ENSMUSG00000027881	1658.27	-0.443801	0.0767979	-5.77882	7.52264e-09	1.53806e-07	Prpf38b
ENSMUSG00000055681	1078.68	-0.443396	0.0869706	-5.09822	3.42857e-07	5.18372e-06	Cope
ENSMUSG00000044150	132.786	-0.443327	0.189847	-2.33518	0.0195338	0.072417	Bclaf3
ENSMUSG00000009555	1005.6	-0.442675	0.0911258	-4.85785	1.1867e-06	1.62094e-05	Cdk9
ENSMUSG00000038611	1234.75	-0.442345	0.0843433	-5.24458	1.56638e-07	2.55184e-06	Phrf1
ENSMUSG00000020541	123.891	-0.442288	0.202927	-2.17954	0.0292917	0.0981795	Tom1l1
ENSMUSG00000030930	363.256	-0.441203	0.127678	-3.4556	0.000549078	0.00381373	Chst15
ENSMUSG00000004565	241.624	-0.441009	0.144991	-3.04163	0.00235302	0.0130378	Pnpla6
ENSMUSG00000059588	258.051	-0.440684	0.17157	-2.56853	0.0102131	0.0433232	Calcrl
ENSMUSG00000066798	218.995	-0.440316	0.153741	-2.864	0.00418325	0.0211187	Zbtb6
ENSMUSG00000021843	370.883	-0.440101	0.125439	-3.50848	0.000450681	0.00323571	Ktn1
ENSMUSG00000074385	132.723	-0.439325	0.194517	-2.25854	0.023912	0.0843573	Gm10684
ENSMUSG00000069255	150.386	-0.438242	0.187886	-2.33249	0.0196748	0.0728179	Dusp22
ENSMUSG00000091133	1460.86	-0.437844	0.0836388	-5.23494	1.65039e-07	2.67684e-06	NA
ENSMUSG00000035960	1347.17	-0.437685	0.0829476	-5.27664	1.31575e-07	2.16753e-06	Apex1
ENSMUSG00000086347	179.905	-0.437476	0.168521	-2.59597	0.00943239	0.0406444	NA
ENSMUSG00000031959	262.346	-0.437231	0.14005	-3.12197	0.00179645	0.0103556	Wdr59
ENSMUSG00000031446	637.843	-0.436737	0.0983431	-4.44095	8.95622e-06	0.000100962	Cul4a
ENSMUSG00000021327	162.958	-0.436511	0.168253	-2.59437	0.00947643	0.0407719	Zkscan3
ENSMUSG00000021692	250.552	-0.436231	0.143778	-3.03406	0.00241282	0.0133334	Dimt1
ENSMUSG00000024349	1673.16	-0.436177	0.092588	-4.71095	2.46565e-06	3.14044e-05	Sting1
ENSMUSG00000025153	8229.12	-0.436176	0.0784051	-5.56311	2.65007e-08	4.95364e-07	Fasn
ENSMUSG00000024527	1246.93	-0.434998	0.0793233	-5.48387	4.16131e-08	7.46549e-07	Afg3l2
ENSMUSG00000052406	495.528	-0.434868	0.107415	-4.04847	5.15545e-05	0.000480925	Rexo4
ENSMUSG00000020736	785.601	-0.434632	0.0969635	-4.48242	7.37996e-06	8.4422e-05	Nt5c
ENSMUSG00000004661	165.256	-0.433548	0.173329	-2.50131	0.0123736	0.0506618	Arid3b
ENSMUSG00000031508	508.606	-0.43351	0.108366	-4.00041	6.3233e-05	0.000575632	Ankrd10
ENSMUSG00000020803	558.986	-0.433491	0.105943	-4.09174	4.28148e-05	0.000408727	Txndc17
ENSMUSG00000029415	1285.58	-0.432983	0.0935477	-4.62847	3.6837e-06	4.48229e-05	Sdad1
ENSMUSG00000022552	264.01	-0.432932	0.139904	-3.09449	0.00197155	0.0111896	Sharpin
ENSMUSG00000038545	517.323	-0.432575	0.106991	-4.04311	5.27464e-05	0.000490798	Cul7
ENSMUSG00000031137	232.911	-0.432561	0.17269	-2.50484	0.0122506	0.0502002	Fgf13
ENSMUSG00000027889	1103.24	-0.432394	0.0930218	-4.64831	3.34663e-06	4.11641e-05	Ampd2
ENSMUSG00000020538	1434.87	-0.43176	0.0847288	-5.09579	3.47294e-07	5.24004e-06	Srebf1
ENSMUSG00000086754	1509.2	-0.431439	0.0890889	-4.84279	1.28026e-06	1.74388e-05	NA
ENSMUSG00000028394	607.712	-0.430716	0.109833	-3.92157	8.79741e-05	0.00076852	Pole3
ENSMUSG00000074802	131.897	-0.430708	0.187616	-2.29569	0.0216935	0.0781425	Gas2l3
ENSMUSG00000043008	642.064	-0.430214	0.0991676	-4.33826	1.43616e-05	0.000152986	Klhl6
ENSMUSG00000050310	379.652	-0.430193	0.128578	-3.34577	0.000820559	0.00538905	Rictor
ENSMUSG00000024498	1949.13	-0.430145	0.0752512	-5.71613	1.08977e-08	2.15478e-07	Tcerg1
ENSMUSG00000027613	2289.81	-0.429139	0.0776262	-5.52828	3.23381e-08	5.93173e-07	Eif6
ENSMUSG00000037369	327.485	-0.428594	0.135058	-3.17341	0.00150662	0.00895146	Kdm6a
ENSMUSG00000035840	211.755	-0.42833	0.149968	-2.85615	0.00428808	0.0215738	Lysmd3
ENSMUSG00000078941	270.146	-0.427991	0.144444	-2.96303	0.00304627	0.0162251	Taf9
ENSMUSG00000078941	270.146	-0.427991	0.144444	-2.96303	0.00304627	0.0162251	Ak6
ENSMUSG00000053907	2793.77	-0.427825	0.0794742	-5.3832	7.31749e-08	1.26644e-06	Mat2a
ENSMUSG00000039294	420.458	-0.427735	0.120102	-3.56142	0.000368857	0.00271721	Cybc1
ENSMUSG00000027132	224.261	-0.427679	0.150252	-2.84642	0.00442139	0.0221009	Katnbl1
ENSMUSG00000035372	153.091	-0.4274	0.175651	-2.43324	0.0149644	0.0588844	1810055G02Rik
ENSMUSG00000071547	172.268	-0.426839	0.186891	-2.28389	0.022378	0.0799269	Nt5dc2
ENSMUSG00000027569	213.214	-0.426683	0.150692	-2.83149	0.0046332	0.0229801	Mrgbp
ENSMUSG00000030822	302.931	-0.426604	0.131562	-3.24262	0.00118437	0.00732375	Prr14
ENSMUSG00000061028	240.3	-0.426337	0.146902	-2.90218	0.00370573	0.0191281	Clasrp
ENSMUSG00000033352	633.632	-0.426024	0.100041	-4.25848	2.05824e-05	0.000212037	Map2k4
ENSMUSG00000039264	1933.37	-0.425603	0.0922496	-4.61361	3.95742e-06	4.76023e-05	Gimap3
ENSMUSG00000089774	688.248	-0.425536	0.107002	-3.97691	6.9817e-05	0.000627608	Slc5a3
ENSMUSG00000033285	1419.72	-0.425517	0.0829908	-5.12727	2.9397e-07	4.51891e-06	Wdr3
ENSMUSG00000027867	217.936	-0.425155	0.15152	-2.80593	0.00501715	0.024382	Spag17
ENSMUSG00000022092	277.359	-0.425006	0.151547	-2.80445	0.00504023	0.0244467	Ppp3cc
ENSMUSG00000066150	629.053	-0.424956	0.100875	-4.21268	2.52358e-05	0.000252032	Slc31a1
ENSMUSG00000021501	166.058	-0.423763	0.178203	-2.37798	0.0174079	0.0662069	Caml
ENSMUSG00000013465	897.513	-0.423571	0.0896367	-4.72542	2.29641e-06	2.94894e-05	Nelfb
ENSMUSG00000023908	475.941	-0.423232	0.110327	-3.83616	0.000124971	0.00104874	Pkmyt1
ENSMUSG00000031155	2184.64	-0.42315	0.096578	-4.38143	1.17902e-05	0.000128194	Pim2
ENSMUSG00000019841	349.898	-0.422816	0.138166	-3.06019	0.00221193	0.012335	Rev3l
ENSMUSG00000027475	923.734	-0.422036	0.087214	-4.83908	1.3044e-06	1.77511e-05	Kif3b
ENSMUSG00000024867	111.404	-0.421961	0.20259	-2.08283	0.0372664	0.117721	Pip5k1b
ENSMUSG00000040390	204.099	-0.421429	0.165897	-2.54031	0.0110755	0.0463403	Map3k10
ENSMUSG00000004931	203.684	-0.421225	0.184743	-2.28006	0.0226041	0.0806132	Apba3
ENSMUSG00000041954	1761.12	-0.420727	0.0829325	-5.07313	3.91326e-07	5.87429e-06	Tnfrsf18
ENSMUSG00000049470	809.672	-0.420726	0.104833	-4.01331	5.98727e-05	0.000549805	Aff4
ENSMUSG00000025499	769.7	-0.420526	0.103962	-4.04501	5.232e-05	0.000487637	Hras
ENSMUSG00000069833	510.38	-0.420296	0.144094	-2.91681	0.00353632	0.0183956	Ahnak
ENSMUSG00000035199	1485.94	-0.419876	0.0805641	-5.2117	1.8712e-07	3.00844e-06	Arl6ip5
ENSMUSG00000047712	133.071	-0.419436	0.188644	-2.22343	0.0261866	0.0904648	Ust
ENSMUSG00000046567	102.801	-0.419307	0.211845	-1.97932	0.0477805	0.142634	4930430F08Rik
ENSMUSG00000047036	804.556	-0.41908	0.101345	-4.13518	3.54673e-05	0.000344396	Zfp445
ENSMUSG00000026491	1619.7	-0.418605	0.0912503	-4.58743	4.48726e-06	5.34944e-05	Ahctf1
ENSMUSG00000026014	496.642	-0.418481	0.138649	-3.01827	0.00254219	0.0139061	Raph1
ENSMUSG00000024645	219.927	-0.417854	0.157332	-2.65587	0.0079105	0.0351363	Timm21
ENSMUSG00000042508	261.314	-0.417667	0.144744	-2.88556	0.00390714	0.0199645	Dmtf1
ENSMUSG00000025494	537.593	-0.417665	0.105028	-3.97669	6.98812e-05	0.000627608	Sigirr
ENSMUSG00000026806	279.517	-0.417291	0.134231	-3.10876	0.00187876	0.0107459	Ddx31
ENSMUSG00000056952	761.826	-0.417215	0.0986543	-4.22906	2.34669e-05	0.000237429	Tatdn2
ENSMUSG00000121489	3732.52	-0.417122	0.0757044	-5.50988	3.59083e-08	6.4975e-07	1810014B01Rik
ENSMUSG00000048755	304.937	-0.416861	0.133773	-3.11618	0.00183211	0.010531	Mcat
ENSMUSG00000004561	149.425	-0.41657	0.178615	-2.33222	0.019689	0.0728179	Mettl17
ENSMUSG00000022451	309.093	-0.416101	0.134814	-3.08649	0.00202534	0.0114375	Twf1
ENSMUSG00000021597	414.342	-0.415956	0.118322	-3.51546	0.000438994	0.00317151	Slf1
ENSMUSG00000051413	1981.23	-0.415411	0.079198	-5.24522	1.56095e-07	2.5458e-06	Plagl2
ENSMUSG00000056069	309.883	-0.415326	0.15359	-2.70412	0.00684853	0.0312109	Otulinl
ENSMUSG00000003721	302.388	-0.415284	0.137172	-3.02746	0.0024662	0.0135729	Insig2
ENSMUSG00000044783	2226.99	-0.415103	0.0825904	-5.02605	5.00694e-07	7.35101e-06	A730008H23Rik
ENSMUSG00000044783	2226.99	-0.415103	0.0825904	-5.02605	5.00694e-07	7.35101e-06	Hjurp
ENSMUSG00000074151	841.984	-0.414323	0.0956334	-4.33241	1.47489e-05	0.000156771	Nlrc5
ENSMUSG00000062248	953.442	-0.414234	0.0949394	-4.36314	1.28209e-05	0.000138175	Cks2
ENSMUSG00000069135	357.816	-0.414165	0.130481	-3.17414	0.00150284	0.00893262	Cep43
ENSMUSG00000019774	169.379	-0.413523	0.164613	-2.5121	0.0120016	0.0493725	Mtrf1l
ENSMUSG00000026641	384.804	-0.413268	0.133639	-3.09243	0.00198528	0.0112502	Usf1
ENSMUSG00000072612	117.646	-0.413233	0.202772	-2.03792	0.0415577	0.128006	Gm10382
ENSMUSG00000026103	2277.42	-0.413213	0.0798988	-5.17171	2.31967e-07	3.66145e-06	Gls
ENSMUSG00000087381	1412.25	-0.412157	0.0874992	-4.7104	2.47227e-06	3.14451e-05	NA
ENSMUSG00000025236	443.148	-0.411081	0.119086	-3.45195	0.000556541	0.0038537	Adpgk
ENSMUSG00000059939	129.486	-0.410833	0.192816	-2.1307	0.0331137	0.1075	9430015G10Rik
ENSMUSG00000085990	184.891	-0.410795	0.202827	-2.02534	0.042832	0.130781	Gm16731
ENSMUSG00000028572	566.096	-0.410732	0.107671	-3.81468	0.00013636	0.00113525	Hook1
ENSMUSG00000038495	1114.3	-0.410715	0.0967485	-4.24518	2.18418e-05	0.000223291	Otud7b
ENSMUSG00000008348	757.378	-0.409398	0.102541	-3.99254	6.53692e-05	0.000591782	Ubc
ENSMUSG00000033790	164.93	-0.409322	0.170547	-2.40006	0.0163923	0.0632104	Tubgcp5
ENSMUSG00000086976	208.156	-0.408922	0.153436	-2.66509	0.00769667	0.0343942	NA
ENSMUSG00000041328	614.997	-0.408798	0.108531	-3.76665	0.000165453	0.00135371	Pcf11
ENSMUSG00000033253	222.844	-0.408634	0.157827	-2.58912	0.00962224	0.0412568	Szt2
ENSMUSG00000027835	796.409	-0.407792	0.101191	-4.02991	5.5799e-05	0.000516264	Pdcd10
ENSMUSG00000086779	110.084	-0.407423	0.204103	-1.99616	0.0459165	0.138418	NA
ENSMUSG00000068036	143.959	-0.40704	0.188339	-2.16121	0.030679	0.101534	Afdn
ENSMUSG00000034543	926.894	-0.406886	0.104168	-3.90606	9.38121e-05	0.000813064	Morc2a
ENSMUSG00000010608	2203.23	-0.406804	0.0815986	-4.98542	6.18262e-07	8.87341e-06	Rbm25
ENSMUSG00000031591	235.228	-0.406627	0.146443	-2.7767	0.00549144	0.0261553	Asah1
ENSMUSG00000046722	1563.29	-0.406302	0.0910369	-4.46304	8.08044e-06	9.19346e-05	Cdc42se1
ENSMUSG00000033237	918.146	-0.405953	0.10487	-3.87103	0.000108378	0.000925871	Arid2
ENSMUSG00000087528	184.105	-0.405516	0.15991	-2.53591	0.0112156	0.0467801	NA
ENSMUSG00000000555	128.021	-0.405271	0.188766	-2.14695	0.0317976	0.104343	Itga5
ENSMUSG00000022914	289.024	-0.404944	0.143621	-2.81952	0.00480954	0.0236869	Brwd1
ENSMUSG00000007570	230.902	-0.404351	0.152828	-2.64579	0.00815012	0.0360808	Fance
ENSMUSG00000014426	377.499	-0.404335	0.118206	-3.42059	0.00062486	0.00427549	Map3k4
ENSMUSG00000021485	765.861	-0.403982	0.115568	-3.49563	0.000472942	0.00337086	Mxd3
ENSMUSG00000026202	2727.22	-0.403861	0.0865901	-4.66405	3.10042e-06	3.84248e-05	Tuba4a
ENSMUSG00000021693	978.802	-0.403852	0.0894624	-4.51421	6.35529e-06	7.35583e-05	Kif2a
ENSMUSG00000038116	389.28	-0.403147	0.118819	-3.39295	0.00069143	0.00466802	Phf20
ENSMUSG00000020115	367.025	-0.403096	0.119381	-3.37655	0.000734012	0.00491043	Tbk1
ENSMUSG00000022370	1252.33	-0.402953	0.105679	-3.81298	0.000137304	0.00114246	Mrpl13
ENSMUSG00000034793	198.057	-0.401918	0.158481	-2.53606	0.0112108	0.0467731	G6pc3
ENSMUSG00000066441	769.499	-0.401901	0.109629	-3.66601	0.000246366	0.0019166	Rdh11
ENSMUSG00000021823	113.263	-0.401215	0.197355	-2.03296	0.0420564	0.129154	Vcl
ENSMUSG00000051346	117.167	-0.400953	0.196326	-2.04228	0.0411234	0.127014	Spryd4
ENSMUSG00000097415	531.268	-0.400842	0.111434	-3.59713	0.000321753	0.00241372	AU020206
ENSMUSG00000051518	302.471	-0.400374	0.159045	-2.51736	0.0118236	0.0487903	Rps19bp1
ENSMUSG00000027900	272.81	-0.399816	0.140067	-2.85446	0.004311	0.0216713	Dram2
ENSMUSG00000026305	1935.11	-0.399237	0.0773619	-5.16063	2.46116e-07	3.85992e-06	Lrrfip1
ENSMUSG00000085667	1399.56	-0.398932	0.0869611	-4.58747	4.48647e-06	5.34944e-05	Gm12992
ENSMUSG00000048696	263.373	-0.398123	0.137619	-2.89295	0.00381643	0.0195924	Mex3d
ENSMUSG00000037321	4205.21	-0.397925	0.0771303	-5.15912	2.4811e-07	3.88292e-06	Tap1
ENSMUSG00000018381	144.574	-0.397784	0.184136	-2.16027	0.0307518	0.101729	Abi3
ENSMUSG00000025158	205.761	-0.397632	0.155129	-2.56323	0.0103704	0.0438766	Rfng
ENSMUSG00000037971	167.31	-0.397616	0.168293	-2.36264	0.0181452	0.0683056	Cfap68
ENSMUSG00000037868	1154.17	-0.396989	0.0835936	-4.74903	2.04396e-06	2.66803e-05	Egr2
ENSMUSG00000034088	4955.6	-0.396958	0.0639991	-6.20255	5.55562e-10	1.34866e-08	Hdlbp
ENSMUSG00000032965	411.31	-0.396843	0.12076	-3.2862	0.00101548	0.00643077	Ift57
ENSMUSG00000048307	949.521	-0.395972	0.0916419	-4.32087	1.55417e-05	0.000164249	Ankrd46
ENSMUSG00000009585	1220.9	-0.395479	0.0862889	-4.58319	4.57939e-06	5.4366e-05	Apobec3
ENSMUSG00000022911	233.652	-0.39531	0.144477	-2.73615	0.00621635	0.0288391	Arl13b
ENSMUSG00000001228	3731.79	-0.395308	0.0653243	-6.05146	1.43536e-09	3.32007e-08	Uhrf1
ENSMUSG00000112654	249.39	-0.39512	0.161931	-2.44006	0.014685	0.0580884	4930455C13Rik
ENSMUSG00000026648	141.549	-0.395087	0.185029	-2.13527	0.0327387	0.106647	Dclre1c
ENSMUSG00000001052	1176.98	-0.395046	0.0831366	-4.75177	2.01648e-06	2.63918e-05	Sec24b
ENSMUSG00000062939	232.826	-0.394878	0.152813	-2.58406	0.00976438	0.041708	Stat4
ENSMUSG00000022378	2309.63	-0.39479	0.0736739	-5.35861	8.38646e-08	1.43792e-06	Cyrib
ENSMUSG00000030779	1650.22	-0.394474	0.0796401	-4.95321	7.29988e-07	1.03457e-05	Rbbp6
ENSMUSG00000031266	152.861	-0.393232	0.185245	-2.12277	0.0337732	0.109189	Gla
ENSMUSG00000025869	1084.56	-0.393199	0.0844251	-4.65737	3.20277e-06	3.95933e-05	Nop16
ENSMUSG00000029389	235.941	-0.39301	0.154941	-2.5365	0.0111965	0.0467335	Ddx55
ENSMUSG00000035578	342.004	-0.392809	0.122854	-3.19737	0.00138687	0.00834446	Iqcg
ENSMUSG00000028911	1567.61	-0.392152	0.0785127	-4.99476	5.891e-07	8.51302e-06	Srsf4
ENSMUSG00000030061	944.132	-0.391763	0.0894728	-4.37857	1.19461e-05	0.000129697	Uba3
ENSMUSG00000035021	2164.86	-0.391396	0.0799998	-4.89246	9.95813e-07	1.37424e-05	Baz1a
ENSMUSG00000030161	570.787	-0.391257	0.111299	-3.51536	0.000439151	0.00317151	Gabarapl1
ENSMUSG00000046718	692.714	-0.390476	0.108164	-3.61005	0.00030614	0.0023118	Bst2
ENSMUSG00000023051	476.706	-0.390469	0.116502	-3.35161	0.00080344	0.00529781	Tarbp2
ENSMUSG00000001627	267.667	-0.390443	0.17292	-2.25794	0.0239493	0.0844684	Ifrd1
ENSMUSG00000063273	2955.54	-0.390234	0.0732874	-5.32472	1.0111e-07	1.70968e-06	Naa15
ENSMUSG00000008373	1333.09	-0.390156	0.0878024	-4.44358	8.84759e-06	9.99644e-05	Prpf31
ENSMUSG00000036817	571.023	-0.389805	0.104929	-3.71494	0.000203253	0.00161325	Sun1
ENSMUSG00000049287	162.173	-0.389616	0.176068	-2.21288	0.0269059	0.0921567	Iba57
ENSMUSG00000032624	2024.81	-0.389456	0.0856419	-4.54749	5.42898e-06	6.33855e-05	Eml4
ENSMUSG00000027667	285.758	-0.389417	0.146343	-2.66098	0.00779129	0.0347368	Zfp639
ENSMUSG00000041225	186.614	-0.388925	0.162257	-2.39697	0.0165314	0.0636298	Arhgap12
ENSMUSG00000037815	1230.19	-0.388186	0.0828328	-4.68638	2.78082e-06	3.47862e-05	Ctnna1
ENSMUSG00000092558	153.116	-0.38788	0.18302	-2.11932	0.0340631	0.109818	Med20
ENSMUSG00000021495	176.215	-0.387877	0.18669	-2.07765	0.0377413	0.118861	Fam193b
ENSMUSG00000021134	2086.18	-0.386088	0.0718126	-5.37632	7.60246e-08	1.3096e-06	Srsf5
ENSMUSG00000027329	133.376	-0.384541	0.191522	-2.00781	0.044663	0.135444	Spef1
ENSMUSG00000006705	618.756	-0.384306	0.105371	-3.64718	0.000265134	0.00203908	Pknox1
ENSMUSG00000031628	2913.88	-0.38363	0.0902641	-4.25008	2.1369e-05	0.000219066	Casp3
ENSMUSG00000032301	2996.88	-0.3836	0.0701202	-5.4706	4.48524e-08	7.98818e-07	Psma4
ENSMUSG00000037266	1002.17	-0.383148	0.0954299	-4.01497	5.94532e-05	0.000546294	Rsrp1
ENSMUSG00000025209	844.364	-0.383035	0.0905984	-4.22783	2.35955e-05	0.000238566	Twnk
ENSMUSG00000120886	460.641	-0.382371	0.121043	-3.15898	0.00158324	0.00932017	NA
ENSMUSG00000071645	754.017	-0.382245	0.0945934	-4.04092	5.32417e-05	0.000495094	Tut1
ENSMUSG00000078521	190.715	-0.381972	0.166295	-2.29695	0.0216215	0.0779403	Aunip
ENSMUSG00000037315	217.067	-0.381458	0.172866	-2.20667	0.0273368	0.0931985	Jade3
ENSMUSG00000025173	308.057	-0.380782	0.128006	-2.97473	0.00293247	0.0156864	Wdr45b
ENSMUSG00000035125	224.412	-0.380695	0.1484	-2.56533	0.0103077	0.0436491	Gcfc2
ENSMUSG00000020941	279.519	-0.380573	0.135782	-2.80282	0.00506576	0.0245382	Map3k14
ENSMUSG00000037896	829.27	-0.380322	0.0917366	-4.1458	3.38625e-05	0.000331438	Rcor1
ENSMUSG00000037907	476.27	-0.379925	0.109791	-3.46044	0.000539287	0.0037635	Ankrd13b
ENSMUSG00000038685	267.86	-0.379816	0.139291	-2.72677	0.00639568	0.0295406	Rtel1
ENSMUSG00000040842	2519.3	-0.379508	0.0711329	-5.3352	9.54405e-08	1.62128e-06	Szrd1
ENSMUSG00000039990	325.424	-0.379425	0.140448	-2.70153	0.00690211	0.0314161	Edrf1
ENSMUSG00000035673	533.441	-0.378605	0.115041	-3.29104	0.000998175	0.00634579	Sbno2
ENSMUSG00000060012	160.616	-0.378402	0.190249	-1.98899	0.0467028	0.140127	Kif13b
ENSMUSG00000021945	675.88	-0.378333	0.102488	-3.69149	0.000222942	0.00175385	Zmym2
ENSMUSG00000034269	1757.5	-0.377976	0.0826269	-4.57449	4.77389e-06	5.63454e-05	Setd5
ENSMUSG00000062866	590.685	-0.377901	0.109343	-3.45611	0.000548027	0.00380823	Phactr2
ENSMUSG00000035401	570.31	-0.377506	0.10542	-3.58097	0.000342315	0.00254461	Emsy
ENSMUSG00000070003	1023.73	-0.377332	0.0888001	-4.24922	2.14512e-05	0.000219755	Ssbp4
ENSMUSG00000036478	6322.38	-0.37672	0.064581	-5.8333	5.43433e-09	1.13557e-07	Btg1
ENSMUSG00000051255	164.352	-0.376538	0.17037	-2.21012	0.0270969	0.0925456	NA
ENSMUSG00000029068	529.185	-0.376464	0.116466	-3.23239	0.00122758	0.00753084	Ccnl2
ENSMUSG00000025533	234.278	-0.375687	0.145903	-2.57491	0.0100266	0.0426429	Asl
ENSMUSG00000029405	2658.41	-0.375412	0.0698226	-5.37665	7.58827e-08	1.30869e-06	G3bp2
ENSMUSG00000037697	168.749	-0.375396	0.181627	-2.06685	0.0387484	0.121233	Ddhd1
ENSMUSG00000022412	706.92	-0.374305	0.0947057	-3.9523	7.74033e-05	0.00068844	Mief1
ENSMUSG00000002844	1370.94	-0.374036	0.0872014	-4.28934	1.79207e-05	0.000186444	Adprh
ENSMUSG00000032582	829.684	-0.374008	0.098428	-3.79981	0.000144806	0.00119811	Rbm6
ENSMUSG00000032411	322.841	-0.37367	0.13637	-2.74012	0.00614167	0.0285376	Tfdp2
ENSMUSG00000022800	765.993	-0.373102	0.0990911	-3.76524	0.000166386	0.00135908	Fyttd1
ENSMUSG00000034880	470.77	-0.372743	0.118908	-3.13472	0.00172016	0.00998494	Mrpl34
ENSMUSG00000022401	192.543	-0.372563	0.158478	-2.35088	0.018729	0.0699605	Xpnpep3
ENSMUSG00000026927	555.69	-0.372265	0.104459	-3.56375	0.0003656	0.00269726	Entr1
ENSMUSG00000074578	280.518	-0.371152	0.170245	-2.1801	0.0292501	0.0981071	Zfas1
ENSMUSG00000005534	180.567	-0.370878	0.177453	-2.09001	0.0366172	0.116051	Insr
ENSMUSG00000008318	149.586	-0.37064	0.179721	-2.06231	0.0391783	0.122287	Relt
ENSMUSG00000021215	750.933	-0.370104	0.0940648	-3.93456	8.33492e-05	0.000731157	Net1
ENSMUSG00000039483	363.738	-0.36965	0.122493	-3.01773	0.00254673	0.0139171	Asb6
ENSMUSG00000038279	2210.02	-0.369498	0.0752273	-4.91175	9.02659e-07	1.2538e-05	Nop2
ENSMUSG00000032846	446.45	-0.369309	0.118718	-3.11081	0.00186574	0.0106839	Zswim6
ENSMUSG00000068457	141.922	-0.368664	0.18425	-2.00089	0.0454039	0.13721	Uty
ENSMUSG00000015950	268.697	-0.368629	0.173191	-2.12845	0.0332997	0.107925	Ncf1
ENSMUSG00000038213	982.983	-0.368322	0.088975	-4.13961	3.47891e-05	0.000339153	Tapbpl
ENSMUSG00000108806	410.829	-0.368163	0.120164	-3.06384	0.00218512	0.012204	NA
ENSMUSG00000025857	400.537	-0.368065	0.120013	-3.06687	0.0021631	0.0121086	Dnaaf5
ENSMUSG00000073542	304.483	-0.367994	0.132113	-2.78545	0.00534531	0.0255973	Cep76
ENSMUSG00000042444	590.315	-0.367719	0.102836	-3.57577	0.000349199	0.00259055	Mindy2
ENSMUSG00000041264	638.826	-0.367519	0.101254	-3.62968	0.000283777	0.00216527	Uspl1
ENSMUSG00000018846	1421.48	-0.36665	0.0834345	-4.39447	1.11044e-05	0.000121999	Pank3
ENSMUSG00000033909	1248.36	-0.366161	0.0894085	-4.09537	4.21497e-05	0.000403162	Usp36
ENSMUSG00000000838	1067.27	-0.366074	0.0855451	-4.27931	1.87472e-05	0.00019463	Fmr1
ENSMUSG00000014039	188.571	-0.366044	0.164078	-2.23092	0.0256865	0.0892054	Prdm15
ENSMUSG00000024007	1324.37	-0.365763	0.0785629	-4.65567	3.22927e-06	3.98874e-05	Ppil1
ENSMUSG00000042185	413.542	-0.365566	0.11672	-3.132	0.00173618	0.0100594	Nfrkb
ENSMUSG00000041765	633.744	-0.365448	0.116787	-3.12918	0.00175298	0.0101528	Ubac2
ENSMUSG00000024188	1034.27	-0.36543	0.0884273	-4.13254	3.58774e-05	0.000348148	Luc7l
ENSMUSG00000109324	3191.11	-0.365325	0.0766952	-4.76334	1.90411e-06	2.50325e-05	Prmt1
ENSMUSG00000031668	186.415	-0.365234	0.166747	-2.19035	0.028499	0.0960845	Eif2ak3
ENSMUSG00000037204	328.613	-0.36518	0.137672	-2.65253	0.00798907	0.0354639	Atg101
ENSMUSG00000035757	229.091	-0.365114	0.163468	-2.23354	0.0255131	0.0887408	Selenoo
ENSMUSG00000024966	5925.71	-0.365074	0.0657207	-5.55493	2.77728e-08	5.17827e-07	Stip1
ENSMUSG00000020802	703.612	-0.364518	0.0944982	-3.85741	0.000114594	0.00097052	Ube2o
ENSMUSG00000031422	2389.61	-0.364411	0.0710581	-5.12836	2.92284e-07	4.49768e-06	Morf4l2
ENSMUSG00000050592	772.061	-0.364405	0.0925859	-3.93585	8.29012e-05	0.000728966	Fam78a
ENSMUSG00000015316	642.637	-0.363958	0.113148	-3.21666	0.00129693	0.00789373	Slamf1
ENSMUSG00000021621	420.283	-0.363838	0.116452	-3.12437	0.00178187	0.0102877	Zcchc9
ENSMUSG00000022972	398.986	-0.363516	0.115798	-3.13922	0.00169396	0.00985361	Cfap298
ENSMUSG00000005102	307.597	-0.363198	0.131321	-2.76573	0.00567963	0.0268142	Eif2ak4
ENSMUSG00000012535	1878.8	-0.362929	0.0776482	-4.67401	2.95372e-06	3.67615e-05	Tnpo3
ENSMUSG00000044876	369.129	-0.362574	0.124382	-2.915	0.00355692	0.0184832	Zfp444
ENSMUSG00000032512	738.991	-0.362319	0.0938838	-3.85923	0.000113746	0.000965006	Wdr48
ENSMUSG00000025532	239.547	-0.362229	0.144607	-2.50493	0.0122477	0.0502002	Crcp
ENSMUSG00000020571	4082.15	-0.362136	0.0672906	-5.38168	7.37942e-08	1.27566e-06	Pdia6
ENSMUSG00000034248	272.07	-0.361962	0.138256	-2.61806	0.00884317	0.0385343	Slc25a37
ENSMUSG00000034493	474.481	-0.361415	0.111578	-3.23913	0.00119894	0.00739522	NA
ENSMUSG00000020167	1106.38	-0.361338	0.0974732	-3.70705	0.000209689	0.00165935	Tcf3
ENSMUSG00000097099	279.223	-0.36132	0.139275	-2.59429	0.00947861	0.0407719	Gm9917
ENSMUSG00000063663	331.934	-0.361238	0.152721	-2.36534	0.0180134	0.0680226	Brwd3
ENSMUSG00000042719	1482.05	-0.361069	0.0889108	-4.06102	4.88585e-05	0.000458391	Naa25
ENSMUSG00000039201	152.256	-0.361047	0.180377	-2.00163	0.0453249	0.13705	Tbc1d25
ENSMUSG00000020248	701.027	-0.361013	0.100243	-3.60138	0.000316535	0.00238308	Nfyb
ENSMUSG00000042472	315.149	-0.361006	0.128187	-2.81624	0.00485889	0.023855	Zfp410
ENSMUSG00000039157	1324.52	-0.358921	0.09887	-3.63023	0.000283169	0.00216287	Eeig1
ENSMUSG00000028455	972.865	-0.358649	0.0892257	-4.01957	5.83035e-05	0.000537072	Stoml2
ENSMUSG00000015355	417.297	-0.35855	0.128408	-2.79226	0.00523408	0.0251959	Cd48
ENSMUSG00000036093	1063.79	-0.358244	0.108749	-3.29423	0.000986929	0.00628788	Arl5a
ENSMUSG00000002825	173.466	-0.358125	0.182643	-1.96079	0.049903	0.147562	Qtrt1
ENSMUSG00000028630	462.548	-0.358072	0.119766	-2.98976	0.00279199	0.0150616	Dyrk2
ENSMUSG00000031601	888.746	-0.357329	0.0897808	-3.98001	6.89112e-05	0.000620412	Cnot7
ENSMUSG00000046516	1096.28	-0.357086	0.112472	-3.17488	0.00149897	0.00891583	Cox17
ENSMUSG00000021408	725.922	-0.356638	0.0959564	-3.71667	0.000201869	0.00160437	Ripk1
ENSMUSG00000032044	237.537	-0.356615	0.153596	-2.32177	0.0202455	0.0742724	Rpusd4
ENSMUSG00000029073	199.939	-0.356545	0.175862	-2.02741	0.0426201	0.130296	Cptp
ENSMUSG00000032577	1022.97	-0.356503	0.0876763	-4.06613	4.78002e-05	0.000449609	Mapkapk3
ENSMUSG00000029009	177.933	-0.356202	0.172255	-2.06787	0.0386521	0.121007	Mthfr
ENSMUSG00000003868	1928.3	-0.35597	0.0832608	-4.27535	1.90835e-05	0.000197424	Ruvbl2
ENSMUSG00000078974	473.053	-0.355769	0.109335	-3.25394	0.00113815	0.00707966	Sec61g
ENSMUSG00000020074	1364.76	-0.355648	0.0795352	-4.47159	7.76418e-06	8.84732e-05	Ccar1
ENSMUSG00000033706	1349.65	-0.355413	0.0869115	-4.08937	4.32547e-05	0.000412659	Smyd5
ENSMUSG00000038764	237.452	-0.355353	0.151868	-2.33988	0.0192898	0.0716415	Ptpn3
ENSMUSG00000021356	8624.39	-0.354929	0.0689747	-5.14579	2.664e-07	4.12962e-06	Irf4
ENSMUSG00000030612	497.161	-0.354749	0.114895	-3.08759	0.00201785	0.011403	Mrpl46
ENSMUSG00000032119	194.396	-0.354739	0.160468	-2.21066	0.0270597	0.0924498	Hinfp
ENSMUSG00000022201	1260.19	-0.35408	0.0823678	-4.29876	1.71756e-05	0.000179522	Zfr
ENSMUSG00000033545	537.323	-0.353933	0.11573	-3.05826	0.00222627	0.0124102	Znrf1
ENSMUSG00000027397	674.894	-0.353463	0.106821	-3.30891	0.000936586	0.00601402	Slc20a1
ENSMUSG00000047281	206.473	-0.353318	0.152549	-2.3161	0.0205529	0.0750259	Sfn
ENSMUSG00000026972	178.6	-0.353116	0.165529	-2.13326	0.0329034	0.107089	Arrdc1
ENSMUSG00000020437	1125.72	-0.352775	0.0962619	-3.66474	0.000247592	0.00192512	Myo1g
ENSMUSG00000029461	312.76	-0.351836	0.13738	-2.56104	0.0104358	0.0440899	Fam168a
ENSMUSG00000021957	6253.52	-0.351677	0.0685082	-5.13336	2.84622e-07	4.39357e-06	Tkt
ENSMUSG00000028540	178.422	-0.351581	0.175288	-2.00574	0.044884	0.135946	Dph2
ENSMUSG00000040325	1382.06	-0.351556	0.0853036	-4.12123	3.76853e-05	0.00036425	Dcaf1
ENSMUSG00000026675	403.259	-0.351293	0.125626	-2.79635	0.00516838	0.0249285	Hsd17b7
ENSMUSG00000037013	1240.42	-0.351061	0.0827471	-4.24258	2.20967e-05	0.000225739	Ss18
ENSMUSG00000026029	1030.36	-0.350797	0.0860522	-4.07656	4.5706e-05	0.000432678	Casp8
ENSMUSG00000079555	329.551	-0.350728	0.131916	-2.65873	0.00784351	0.0349337	Haus3
ENSMUSG00000034422	963.417	-0.350477	0.108993	-3.21559	0.00130176	0.00791324	Parp14
ENSMUSG00000017132	842.07	-0.350398	0.0922632	-3.79781	0.000145979	0.00120646	Cyth1
ENSMUSG00000021694	163.169	-0.350339	0.169951	-2.06141	0.039264	0.122479	Ercc8
ENSMUSG00000034247	264.305	-0.350316	0.139061	-2.51916	0.0117634	0.0486047	Plekhm1
ENSMUSG00000045210	762.714	-0.350165	0.101441	-3.45189	0.000556666	0.0038537	Vcpip1
ENSMUSG00000015176	4126.98	-0.349592	0.0657546	-5.31662	1.05713e-07	1.77934e-06	Nolc1
ENSMUSG00000001248	597.651	-0.349277	0.106753	-3.27181	0.00106862	0.00671239	Gramd1a
ENSMUSG00000037119	842.7	-0.348713	0.103997	-3.35311	0.000799095	0.00527152	Fam91a1
ENSMUSG00000029771	505.162	-0.348417	0.116774	-2.98368	0.00284806	0.0152984	Irf5
ENSMUSG00000028729	1620.94	-0.348193	0.0765459	-4.54882	5.39481e-06	6.30867e-05	Ebna1bp2
ENSMUSG00000051391	4183.98	-0.347998	0.0645889	-5.38789	7.12888e-08	1.23525e-06	Ywhag
ENSMUSG00000034801	581.202	-0.347986	0.107607	-3.23387	0.00122126	0.0075046	Sos2
ENSMUSG00000036916	223.505	-0.347805	0.148259	-2.34593	0.0189798	0.0706867	Zfp280c
ENSMUSG00000021276	1241.9	-0.347208	0.0846662	-4.1009	4.11538e-05	0.000395437	Cinp
ENSMUSG00000030037	254.451	-0.347149	0.144125	-2.40867	0.0160108	0.0620144	Mrpl53
ENSMUSG00000085039	328.525	-0.347088	0.133145	-2.60684	0.00913832	0.0395859	NA
ENSMUSG00000046096	153.435	-0.346976	0.176589	-1.96488	0.0494284	0.146424	Mosmo
ENSMUSG00000029003	217.771	-0.346955	0.153017	-2.26743	0.023364	0.0828011	Mad2l2
ENSMUSG00000001632	676.841	-0.346336	0.0974573	-3.55372	0.000379822	0.00278265	Brpf1
ENSMUSG00000017670	656.903	-0.346235	0.0981506	-3.52759	0.000419362	0.00303903	Elmo2
ENSMUSG00000021131	3060.42	-0.346123	0.0772599	-4.47999	7.46477e-06	8.52597e-05	Erh
ENSMUSG00000028212	739.168	-0.344935	0.110039	-3.13465	0.00172061	0.00998494	Ccne2
ENSMUSG00000034575	548.01	-0.344738	0.109134	-3.15885	0.00158394	0.00932056	Tent4a
ENSMUSG00000040928	568.046	-0.344558	0.109122	-3.15754	0.00159108	0.00935634	S100pbp
ENSMUSG00000027395	1366.99	-0.343844	0.0951719	-3.61288	0.000302817	0.00228918	Polr1b
ENSMUSG00000070056	1328.56	-0.343475	0.0845714	-4.06135	4.87888e-05	0.000458029	Mfhas1
ENSMUSG00000056692	2686.36	-0.343445	0.0942815	-3.64276	0.000269727	0.00207312	Ilrun
ENSMUSG00000040482	178.726	-0.342972	0.171467	-2.00022	0.0454769	0.137374	Dxo
ENSMUSG00000034165	3243.41	-0.342641	0.0840641	-4.07596	4.58255e-05	0.000433251	Ccnd3
ENSMUSG00000031107	197.152	-0.342572	0.169834	-2.0171	0.0436854	0.132863	Rbmx2
ENSMUSG00000039568	651.521	-0.341983	0.105846	-3.23095	0.00123382	0.00756278	Ubald1
ENSMUSG00000019295	197.805	-0.341971	0.171752	-1.99107	0.0464728	0.139633	Tmem129
ENSMUSG00000045799	475.49	-0.3415	0.125701	-2.71676	0.00659237	0.0303072	NA
ENSMUSG00000014778	198.289	-0.341341	0.156148	-2.18602	0.0288143	0.0969995	Fhod1
ENSMUSG00000020250	2492.51	-0.341232	0.0853387	-3.99856	6.37298e-05	0.000579437	Txnrd1
ENSMUSG00000008435	167.948	-0.341213	0.173986	-1.96115	0.049862	0.147471	Rdh13
ENSMUSG00000048285	687.663	-0.340994	0.0987718	-3.45234	0.000555752	0.003851	Frmd6
ENSMUSG00000068882	2804.37	-0.340662	0.0711705	-4.78655	1.69669e-06	2.26291e-05	Ssb
ENSMUSG00000024795	806.196	-0.340523	0.0962386	-3.53833	0.000402674	0.00293545	Kif20b
ENSMUSG00000091474	263.481	-0.340197	0.144422	-2.35558	0.0184939	0.0692903	NA
ENSMUSG00000010453	558.314	-0.340029	0.113685	-2.99096	0.00278098	0.0150242	Kansl3
ENSMUSG00000032407	1636.53	-0.339807	0.0788071	-4.31188	1.61869e-05	0.000170455	U2surp
ENSMUSG00000086429	368.595	-0.33962	0.128728	-2.63828	0.00833286	0.0366939	Gt(ROSA)26Sor
ENSMUSG00000042462	830.448	-0.339462	0.102215	-3.32104	0.000896811	0.00582215	Dctpp1
ENSMUSG00000029686	1076.54	-0.339284	0.0835717	-4.0598	4.91146e-05	0.000460501	Cul1
ENSMUSG00000061474	254.672	-0.339061	0.149795	-2.2635	0.0236051	0.0834893	Mrps36
ENSMUSG00000020974	226.098	-0.338885	0.156639	-2.16348	0.0305046	0.101071	Pole2
ENSMUSG00000025144	355.636	-0.338862	0.125293	-2.70455	0.00683967	0.0311995	Cenpx
ENSMUSG00000029283	259.884	-0.338659	0.149865	-2.25976	0.0238363	0.0841506	Cdc7
ENSMUSG00000014349	1747.21	-0.338392	0.07852	-4.30963	1.63525e-05	0.000171952	Ube2z
ENSMUSG00000020863	1440.24	-0.338221	0.0867584	-3.89843	9.68188e-05	0.000837331	Luc7l3
ENSMUSG00000023088	722.485	-0.338137	0.102484	-3.2994	0.000968915	0.00618919	Abcc1
ENSMUSG00000036591	356.212	-0.33803	0.129438	-2.61153	0.0090138	0.0391387	Arhgap21
ENSMUSG00000028060	439.104	-0.337543	0.111272	-3.0335	0.00241738	0.0133391	Khdc4
ENSMUSG00000045098	534.991	-0.337392	0.110381	-3.05661	0.00223854	0.0124645	Kmt5b
ENSMUSG00000027454	260.949	-0.337169	0.141052	-2.39039	0.0168304	0.0644602	Gins1
ENSMUSG00000029723	1465.53	-0.337031	0.0855285	-3.94057	8.1287e-05	0.000716915	Spacdr
ENSMUSG00000029723	1465.53	-0.337031	0.0855285	-3.94057	8.1287e-05	0.000716915	LOC122152370
ENSMUSG00000029723	1465.53	-0.337031	0.0855285	-3.94057	8.1287e-05	0.000716915	LOC122152371
ENSMUSG00000020994	2148.23	-0.336919	0.0715557	-4.70849	2.49561e-06	3.16799e-05	Pnn
ENSMUSG00000035232	628.211	-0.336734	0.102358	-3.28978	0.00100268	0.00636614	Pdk3
ENSMUSG00000031007	686.701	-0.336477	0.103445	-3.25271	0.0011431	0.00710744	Atp6ap2
ENSMUSG00000004393	704.517	-0.336397	0.0987892	-3.4052	0.000661151	0.00448212	Ddx56
ENSMUSG00000045969	903.693	-0.33564	0.0968326	-3.46619	0.000527894	0.00370155	Ing1
ENSMUSG00000026782	568.404	-0.335432	0.123304	-2.72037	0.00652089	0.0300274	Abi2
ENSMUSG00000038650	601.946	-0.335391	0.107757	-3.11249	0.00185516	0.0106316	Rnh1
ENSMUSG00000019883	824.602	-0.335058	0.0915247	-3.66084	0.000251388	0.00194845	Echdc1
ENSMUSG00000036986	2257.67	-0.33492	0.0798248	-4.1957	2.72035e-05	0.000269782	Pml
ENSMUSG00000000708	202.381	-0.334618	0.168007	-1.99169	0.0464054	0.139491	Kat2b
ENSMUSG00000032369	874.208	-0.33434	0.0916715	-3.64716	0.000265159	0.00203908	Plscr1
ENSMUSG00000030199	1312.22	-0.334148	0.103744	-3.22088	0.00127796	0.00781056	Etv6
ENSMUSG00000022387	781.852	-0.333817	0.0925957	-3.60511	0.000312026	0.00235275	Brd1
ENSMUSG00000051730	593.912	-0.333159	0.108951	-3.05787	0.00222919	0.0124171	Mettl5
ENSMUSG00000020430	1974.09	-0.332882	0.0753331	-4.41881	9.92476e-06	0.000110206	Pes1
ENSMUSG00000007850	3299.4	-0.332818	0.0667059	-4.98934	6.0586e-07	8.71243e-06	Hnrnph1
ENSMUSG00000027288	2996.21	-0.332817	0.0757519	-4.39351	1.11535e-05	0.000122355	Zfp106
ENSMUSG00000033228	2598.34	-0.332761	0.0720753	-4.61686	3.89595e-06	4.69781e-05	Scaf11
ENSMUSG00000068523	612.707	-0.33236	0.116209	-2.86003	0.00423603	0.0213558	Gng5
ENSMUSG00000002068	722.806	-0.33197	0.0996422	-3.33162	0.000863423	0.00562679	Ccne1
ENSMUSG00000036054	221.467	-0.331957	0.160113	-2.07326	0.0381478	0.119785	Sugp2
ENSMUSG00000049305	513.826	-0.331494	0.10846	-3.05636	0.00224041	0.0124702	Ccdc71
ENSMUSG00000030704	1194.74	-0.331365	0.0836382	-3.96189	7.43587e-05	0.000663366	Rab6a
ENSMUSG00000033021	250.487	-0.33117	0.146682	-2.25774	0.023962	0.0844726	Gmppa
ENSMUSG00000037296	343.83	-0.33101	0.128919	-2.56759	0.0102409	0.0434161	Lsm1
ENSMUSG00000022018	655.385	-0.33061	0.150565	-2.1958	0.0281062	0.0951086	Rgcc
ENSMUSG00000035901	613.778	-0.330465	0.109188	-3.02656	0.00247356	0.0136061	Dennd5a
ENSMUSG00000097620	695.793	-0.33042	0.0978394	-3.37717	0.00073235	0.00490378	NA
ENSMUSG00000039988	926.743	-0.32998	0.100231	-3.2922	0.000994083	0.00632798	Ankrd13c
ENSMUSG00000020453	777.549	-0.329773	0.0991388	-3.32638	0.000879823	0.00572164	Patz1
ENSMUSG00000114977	360.315	-0.329696	0.133847	-2.46324	0.0137689	0.055102	NA
ENSMUSG00000025439	1329.05	-0.329631	0.0977752	-3.37131	0.000748105	0.00498884	Clns1a
ENSMUSG00000079111	716.143	-0.329547	0.0977974	-3.36969	0.000752514	0.00500916	Kdelr2
ENSMUSG00000027540	3106.75	-0.329086	0.069429	-4.73989	2.13834e-06	2.78382e-05	Ptpn1
ENSMUSG00000071054	2146.69	-0.329068	0.0751131	-4.38097	1.18152e-05	0.00012837	Safb
ENSMUSG00000014859	2242.55	-0.328461	0.0828768	-3.96324	7.39393e-05	0.000660827	E2f4
ENSMUSG00000039183	782.276	-0.328404	0.0941203	-3.48919	0.000484487	0.00343815	Nubp2
ENSMUSG00000054414	333.189	-0.328262	0.143478	-2.28789	0.0221439	0.0794533	Slc30a7
ENSMUSG00000042496	233.615	-0.327914	0.148049	-2.2149	0.0267671	0.091788	Prdm10
ENSMUSG00000026558	3833.23	-0.327629	0.0708442	-4.62463	3.7526e-06	4.5573e-05	Uck2
ENSMUSG00000108129	386.43	-0.327365	0.128497	-2.54764	0.0108453	0.0455455	4930417O13Rik
ENSMUSG00000020038	485.084	-0.327293	0.117101	-2.79496	0.00519055	0.0250109	Cry1
ENSMUSG00000002984	2193.97	-0.326849	0.0794381	-4.11451	3.87995e-05	0.000374282	Tomm40
ENSMUSG00000017776	711.418	-0.326469	0.0985285	-3.31345	0.000921532	0.00594703	Crk
ENSMUSG00000031584	638.203	-0.326406	0.0990551	-3.2952	0.000983516	0.00627701	Gsr
ENSMUSG00000028381	946.183	-0.326396	0.0923771	-3.5333	0.000410405	0.00298153	Ugcg
ENSMUSG00000092381	857.981	-0.32601	0.0903193	-3.60953	0.000306752	0.00231417	NA
ENSMUSG00000020063	288.733	-0.324842	0.137439	-2.36353	0.0181017	0.0682193	Sirt1
ENSMUSG00000027115	237.599	-0.324738	0.151885	-2.13805	0.0325128	0.106095	Kif18a
ENSMUSG00000037070	1818.27	-0.324686	0.0734305	-4.42167	9.79411e-06	0.000109235	Rbmxl1
ENSMUSG00000031278	2519.71	-0.324587	0.069212	-4.68975	2.73541e-06	3.43057e-05	Acsl4
ENSMUSG00000028180	1529.38	-0.324558	0.0762291	-4.25766	2.06573e-05	0.000212659	Zranb2
ENSMUSG00000059248	3310.78	-0.324369	0.0662927	-4.89298	9.93184e-07	1.3719e-05	Septin9
ENSMUSG00000028044	1243.64	-0.323982	0.0829233	-3.90701	9.34443e-05	0.000811008	Cks1b
ENSMUSG00000003039	742.424	-0.323866	0.100387	-3.22616	0.00125463	0.00767757	Fam32a
ENSMUSG00000022228	189.723	-0.323832	0.164083	-1.97359	0.0484286	0.144276	Zscan26
ENSMUSG00000086993	456.221	-0.323435	0.127515	-2.53645	0.0111981	0.0467335	Rsf1os2
ENSMUSG00000017499	1060.33	-0.323235	0.0864533	-3.73883	0.000184876	0.00148699	Cdc6
ENSMUSG00000014907	789.063	-0.323193	0.0999587	-3.23327	0.00122384	0.00751414	Naf1
ENSMUSG00000033712	925.141	-0.322061	0.0879834	-3.66047	0.000251753	0.00195026	Ccar2
ENSMUSG00000058454	605.016	-0.321903	0.128857	-2.49814	0.0124848	0.0509613	Dhcr7
ENSMUSG00000036391	292.61	-0.321654	0.135512	-2.37362	0.0176147	0.0668204	Sec24a
ENSMUSG00000091337	417.982	-0.321593	0.126275	-2.54676	0.0108727	0.0456343	Eid1
ENSMUSG00000035047	567.318	-0.321481	0.103269	-3.11306	0.00185161	0.0106154	Kri1
ENSMUSG00000040774	809.075	-0.321454	0.0929201	-3.45947	0.000541246	0.00377359	Cept1
ENSMUSG00000018669	347.259	-0.321382	0.148024	-2.17115	0.02992	0.099708	Cdk5rap3
ENSMUSG00000037326	276.366	-0.320783	0.133844	-2.39668	0.0165442	0.0636458	Capn15
ENSMUSG00000020827	1290.98	-0.320648	0.0828911	-3.8683	0.000109595	0.000933552	Mink1
ENSMUSG00000028149	1670.7	-0.32039	0.076945	-4.16388	3.12882e-05	0.000308293	Rap1gds1
ENSMUSG00000021576	755.152	-0.32002	0.0938157	-3.41116	0.000646878	0.00439549	Pdcd6
ENSMUSG00000044452	460.846	-0.319933	0.118869	-2.69148	0.0071136	0.0322094	Zfp507
ENSMUSG00000029610	975.87	-0.319862	0.0893047	-3.58169	0.000341377	0.00254149	Aimp2
ENSMUSG00000030521	831.102	-0.319565	0.0906343	-3.52587	0.00042209	0.00305535	Mphosph10
ENSMUSG00000005846	2687.52	-0.319551	0.0736159	-4.34079	1.4197e-05	0.000151452	Rsl1d1
ENSMUSG00000028879	327.463	-0.319351	0.126603	-2.52246	0.0116538	0.0482657	Stx12
ENSMUSG00000025269	304.459	-0.318944	0.129897	-2.45537	0.0140739	0.0561392	Apex2
ENSMUSG00000031774	513.009	-0.318446	0.104481	-3.04789	0.00230458	0.0127934	Psme3ip1
ENSMUSG00000029504	372.084	-0.3183	0.12769	-2.49276	0.0126754	0.0515532	Ddx51
ENSMUSG00000044763	399.906	-0.317731	0.121735	-2.61004	0.00905329	0.0392639	Trmt10c
ENSMUSG00000017765	464.93	-0.317601	0.113046	-2.80949	0.00496202	0.0242249	Slc12a4
ENSMUSG00000000826	1754.22	-0.31753	0.0848826	-3.74081	0.000183427	0.00147695	Dnajc5
ENSMUSG00000055692	208.542	-0.31739	0.153576	-2.06666	0.0387664	0.121261	Tmem191
ENSMUSG00000029036	1053.63	-0.317216	0.0891693	-3.55745	0.000374467	0.00275164	Atad3a
ENSMUSG00000072582	375.716	-0.317089	0.130271	-2.43408	0.0149298	0.0588514	Ptrh2
ENSMUSG00000020544	187.624	-0.317022	0.159821	-1.9836	0.0473002	0.141545	Cox11
ENSMUSG00000046962	294.356	-0.316972	0.137359	-2.30762	0.0210205	0.0762409	Zbtb21
ENSMUSG00000029012	264.405	-0.31682	0.149862	-2.11408	0.0345085	0.110914	Orc5
ENSMUSG00000041057	1963.65	-0.316663	0.0803147	-3.94278	8.05417e-05	0.000711621	Wdr43
ENSMUSG00000063884	861.743	-0.316627	0.0907408	-3.48935	0.000484195	0.00343774	Ptcd3
ENSMUSG00000020189	1965.04	-0.316371	0.0992462	-3.18774	0.0014339	0.00859228	Osbpl8
ENSMUSG00000041459	4895.93	-0.316282	0.0623279	-5.07448	3.88555e-07	5.83865e-06	Tardbp
ENSMUSG00000020134	1428.41	-0.316275	0.0861005	-3.67332	0.000239415	0.00186945	Peli1
ENSMUSG00000033323	529.988	-0.315747	0.109434	-2.88527	0.00391078	0.0199762	Ctdp1
ENSMUSG00000029249	467.388	-0.315626	0.113012	-2.79285	0.00522462	0.0251585	Rest
ENSMUSG00000035529	675.224	-0.315608	0.0978327	-3.226	0.00125534	0.0076787	Prdm4
ENSMUSG00000036693	1062.15	-0.315538	0.0841565	-3.74942	0.000177247	0.00143364	Nop14
ENSMUSG00000037885	449.606	-0.315386	0.112077	-2.81401	0.00489281	0.0239611	Stk35
ENSMUSG00000032120	286.246	-0.315231	0.141138	-2.23349	0.0255165	0.0887408	C2cd2l
ENSMUSG00000030059	492.094	-0.315057	0.112146	-2.80935	0.00496409	0.0242249	Tmf1
ENSMUSG00000026623	1194.7	-0.315018	0.0933813	-3.37346	0.00074231	0.00495468	Lpgat1
ENSMUSG00000023353	757.05	-0.314924	0.0995148	-3.16459	0.00155302	0.00917672	Agap3
ENSMUSG00000028467	218.741	-0.314877	0.153565	-2.05044	0.0403212	0.124982	Gba2
ENSMUSG00000020893	931.821	-0.314628	0.0901768	-3.48902	0.000484802	0.00343872	Per1
ENSMUSG00000043505	455.166	-0.314354	0.109745	-2.86442	0.0041778	0.0210985	Gimap5
ENSMUSG00000003200	634.305	-0.314214	0.113151	-2.77695	0.00548716	0.0261553	Sh3gl1
ENSMUSG00000052301	396.379	-0.313539	0.135604	-2.31218	0.020768	0.0755483	Doc2a
ENSMUSG00000027589	283.121	-0.313249	0.139473	-2.24595	0.0247072	0.0865398	Pcmtd2
ENSMUSG00000021901	1102.89	-0.312871	0.0861176	-3.63307	0.000280067	0.00214252	Bap1
ENSMUSG00000042729	634.176	-0.312764	0.105537	-2.96355	0.00304117	0.0162038	Wdr74
ENSMUSG00000022369	391.026	-0.312694	0.125431	-2.49295	0.0126685	0.0515393	Mtbp
ENSMUSG00000018428	549.513	-0.31235	0.111309	-2.80615	0.00501373	0.024382	Akap1
ENSMUSG00000020070	221.252	-0.31233	0.156871	-1.991	0.0464812	0.139633	Rufy2
ENSMUSG00000021282	3610.52	-0.312238	0.0752434	-4.14971	3.32902e-05	0.00032627	Eif5
ENSMUSG00000024953	1191.88	-0.312155	0.0923355	-3.38066	0.000723113	0.00485297	Prdx5
ENSMUSG00000021224	259.914	-0.311871	0.142158	-2.19383	0.0282474	0.0954842	Numb
ENSMUSG00000026492	229.449	-0.311381	0.146636	-2.12349	0.0337126	0.109023	Tfb2m
ENSMUSG00000030123	498.121	-0.31118	0.122295	-2.5445	0.0109435	0.045879	Plxnd1
ENSMUSG00000039682	1672.31	-0.311162	0.0898172	-3.4644	0.000531422	0.00371919	Lap3
ENSMUSG00000020841	1208.37	-0.310728	0.131041	-2.37123	0.0177289	0.0671843	Cpd
ENSMUSG00000028010	2207.92	-0.310413	0.0732611	-4.23707	2.26452e-05	0.000230701	Gar1
ENSMUSG00000049091	947.061	-0.310363	0.0907889	-3.41851	0.000629651	0.00429828	Sephs2
ENSMUSG00000030374	575.654	-0.310236	0.107684	-2.88099	0.0039643	0.0202104	Strn4
ENSMUSG00000072437	247.711	-0.309658	0.144748	-2.13929	0.0324119	0.105841	Nanos1
ENSMUSG00000066839	390.399	-0.309623	0.119609	-2.58862	0.00963618	0.0412927	Ecsit
ENSMUSG00000020532	2110.62	-0.309551	0.0971521	-3.18625	0.00144128	0.00862948	Acaca
ENSMUSG00000036078	989.209	-0.309542	0.088058	-3.5152	0.00043942	0.00317188	Sigmar1
ENSMUSG00000030002	1501.15	-0.309119	0.080252	-3.85185	0.000117227	0.000989966	Dusp11
ENSMUSG00000010663	476.12	-0.309023	0.110249	-2.80296	0.00506363	0.0245382	Fads1
ENSMUSG00000015697	923.378	-0.308644	0.0882342	-3.49801	0.000468739	0.00335064	Setdb1
ENSMUSG00000029439	586.484	-0.307939	0.0996185	-3.09118	0.00199364	0.0112889	Sfswap
ENSMUSG00000037029	547.593	-0.307539	0.112107	-2.74328	0.00608294	0.0283094	Zfp146
ENSMUSG00000028282	781.628	-0.307448	0.0963761	-3.19008	0.00142231	0.00853679	Casp8ap2
ENSMUSG00000104559	285.36	-0.307105	0.137755	-2.22936	0.0257901	0.0894175	NA
ENSMUSG00000055322	828.31	-0.307072	0.115117	-2.66748	0.00764215	0.0342025	Tns1
ENSMUSG00000024691	1366.99	-0.307031	0.0901874	-3.40437	0.000663175	0.00449377	Fam111a
ENSMUSG00000025509	576.05	-0.306995	0.113696	-2.70015	0.00693091	0.0315277	Pnpla2
ENSMUSG00000050555	403.983	-0.306959	0.118288	-2.59501	0.0094588	0.0407105	Hyls1
ENSMUSG00000019139	1940.57	-0.306764	0.0802783	-3.82126	0.000132773	0.00110916	Isyna1
ENSMUSG00000037761	234.477	-0.306686	0.143777	-2.13307	0.0329194	0.107108	Actr5
ENSMUSG00000085767	344.299	-0.306676	0.126934	-2.41603	0.0156909	0.0609611	NA
ENSMUSG00000109865	1269.84	-0.306596	0.0855249	-3.58488	0.00033724	0.00252475	Hspa14
ENSMUSG00000021428	533.859	-0.305552	0.1106	-2.76268	0.00573297	0.0270054	Riok1
ENSMUSG00000018697	412.153	-0.305537	0.116964	-2.61223	0.00899547	0.0391012	Aatf
ENSMUSG00000048039	963.07	-0.305468	0.0909833	-3.3574	0.000786789	0.00520789	Isg20l2
ENSMUSG00000056211	1139.29	-0.305113	0.0892645	-3.41808	0.000630649	0.0043031	R3hdm1
ENSMUSG00000016028	647.58	-0.304629	0.124577	-2.44531	0.0144729	0.057472	Celsr1
ENSMUSG00000017615	430.293	-0.304601	0.123656	-2.46329	0.0137667	0.055102	Tnfaip1
ENSMUSG00000034154	505.269	-0.304471	0.118418	-2.57116	0.0101359	0.0430704	Ino80
ENSMUSG00000031691	1649.62	-0.303827	0.0822771	-3.69272	0.000221866	0.00174726	Tnpo2
ENSMUSG00000028792	2732.38	-0.30382	0.0772528	-3.9328	8.3961e-05	0.000736085	Ak2
ENSMUSG00000035439	378.686	-0.303807	0.132517	-2.29259	0.0218716	0.0786104	Haus8
ENSMUSG00000000282	342.641	-0.303513	0.13145	-2.30896	0.0209456	0.0760441	Mnt
ENSMUSG00000020485	784.418	-0.303509	0.0989752	-3.06651	0.00216571	0.0121186	Supt4a
ENSMUSG00000031400	1186.52	-0.302563	0.0943491	-3.20685	0.00134199	0.00811091	G6pdx
ENSMUSG00000052798	1562.89	-0.302501	0.0751912	-4.02309	5.74393e-05	0.000530106	Nup107
ENSMUSG00000037519	869.981	-0.302261	0.0881106	-3.43047	0.000602531	0.00414198	Ppfia1
ENSMUSG00000021532	247.145	-0.301931	0.143403	-2.10548	0.0352495	0.112701	Fastkd3
ENSMUSG00000026520	761.695	-0.301856	0.0939932	-3.21146	0.00132062	0.00801471	Pycr2
ENSMUSG00000033186	372.202	-0.301823	0.119037	-2.53552	0.0112279	0.0468179	Mzt1
[truncated: 3,169 more rows]

## Sheet: p0.05 DN (2-fold, 728)
ems	baseMean	log2FoldChange	lfcSE	stat	pvalue	padj	SYMBOL
ENSMUSG00000037161	55.8594	-7.34928	1.05159	-6.98872	2.77402e-12	9.01544e-11	Mgarp
ENSMUSG00000035186	28.4993	-6.37369	1.0805	-5.89886	3.66028e-09	7.91859e-08	Ubd
ENSMUSG00000097558	49.2052	-6.15938	0.785577	-7.84058	4.48462e-15	1.95187e-13	NA
ENSMUSG00000040680	10.5624	-5.8284	1.31313	-4.43857	9.05597e-06	0.00010193	Kremen2
ENSMUSG00000039095	4.66224	-5.63554	1.46167	-3.85556	0.000115466	NA	En2
ENSMUSG00000015879	4.50965	-5.5871	1.4828	-3.76793	0.000164607	NA	Fam184b
ENSMUSG00000073421	357.441	-5.41887	0.241261	-22.4606	1.00713e-111	5.29141e-109	H2-Ab1
ENSMUSG00000062168	3.88146	-5.36964	1.5075	-3.56195	0.000368106	NA	Ppef1
ENSMUSG00000025515	7.2305	-5.27271	1.37318	-3.83977	0.00012315	0.00103701	Muc2
ENSMUSG00000050370	91.3999	-5.22526	0.435767	-11.991	3.96283e-33	5.20511e-31	Ch25h
ENSMUSG00000113619	3.47042	-5.21379	1.5861	-3.28717	0.00101198	NA	NA
ENSMUSG00000045667	43.4027	-5.14932	0.620285	-8.30154	1.0277e-16	5.14234e-15	Smtnl2
ENSMUSG00000037820	531.027	-5.12805	0.202795	-25.2868	4.46048e-141	2.98264e-138	Tgm2
ENSMUSG00000031637	152.877	-5.06952	0.324788	-15.6087	6.35485e-55	1.58451e-52	Lrp2bp
ENSMUSG00000109881	773.413	-5.04135	0.158918	-31.7229	7.50154e-221	1.22617e-217	NA
ENSMUSG00000092283	182.885	-5.02856	0.313029	-16.0642	4.54429e-58	1.17283e-55	NA
ENSMUSG00000078566	1142.51	-4.97496	0.133224	-37.3428	3.31539e-305	8.12879e-302	Bnip3
ENSMUSG00000112705	2.76809	-4.88039	1.66876	-2.92455	0.0034495	NA	NA
ENSMUSG00000035105	4952.41	-4.86445	0.184536	-26.3604	3.89954e-153	3.37448e-150	Egln3
ENSMUSG00000045725	9.48065	-4.74678	1.1916	-3.98355	6.78935e-05	0.000611998	Prr15
ENSMUSG00000120549	5.01162	-4.72619	1.43146	-3.30165	0.000961179	NA	NA
ENSMUSG00000038496	18.4398	-4.70508	0.836444	-5.62509	1.85407e-08	3.53765e-07	Slc19a3
ENSMUSG00000087086	2.45049	-4.70371	1.68772	-2.78701	0.00531964	NA	NA
ENSMUSG00000031760	2.43077	-4.69395	1.6893	-2.77863	0.00545888	NA	Mt3
ENSMUSG00000025348	27.0431	-4.67107	0.698101	-6.69111	2.21489e-11	6.32684e-10	Itga7
ENSMUSG00000028527	1466.1	-4.63557	0.117216	-39.5474	0	0	Ak4
ENSMUSG00000003153	4996.33	-4.62292	0.0900289	-51.3493	0	0	Slc2a3
ENSMUSG00000114755	2.29533	-4.60865	1.73805	-2.65162	0.00801075	NA	Galr3
ENSMUSG00000057457	47.4641	-4.60766	0.515103	-8.94512	3.71556e-19	2.24936e-17	Phex
ENSMUSG00000117745	2.24861	-4.58377	1.71724	-2.66926	0.00760182	NA	NA
ENSMUSG00000072594	4.54085	-4.57852	1.47511	-3.10386	0.00191016	NA	NA
ENSMUSG00000020836	2.11803	-4.49399	1.74818	-2.57067	0.0101501	NA	Coro6
ENSMUSG00000034161	2.10574	-4.48699	1.7414	-2.57667	0.00997585	NA	Scx
ENSMUSG00000112501	2.07131	-4.46698	1.80253	-2.47818	0.0132055	NA	NA
ENSMUSG00000006567	58.8103	-4.45576	0.465247	-9.57719	9.97183e-22	7.33478e-20	Atp7b
ENSMUSG00000024924	116.758	-4.44919	0.327662	-13.5786	5.36518e-42	9.50929e-40	Vldlr
ENSMUSG00000065434	1.98002	-4.3941	1.82585	-2.4066	0.0161019	NA	Mir7-1
ENSMUSG00000118144	1.98002	-4.3941	1.82585	-2.4066	0.0161019	NA	NA
ENSMUSG00000113520	7.4733	-4.38675	1.23029	-3.56562	0.000363001	0.00267943	Gm4257
ENSMUSG00000094690	1.96044	-4.38203	1.82835	-2.39671	0.0165429	NA	1600014C23Rik
ENSMUSG00000083458	1.94816	-4.37433	1.81019	-2.4165	0.0156704	NA	NA
ENSMUSG00000038550	91.6702	-4.36432	0.35231	-12.3877	3.04569e-35	4.2269e-33	Ciart
ENSMUSG00000017390	122.703	-4.33601	0.311472	-13.9211	4.71892e-44	8.57038e-42	Aldoc
ENSMUSG00000025014	28.7773	-4.33174	0.622038	-6.96379	3.31245e-12	1.05783e-10	Dntt
ENSMUSG00000052821	14.1464	-4.30531	0.871707	-4.93894	7.85474e-07	1.10364e-05	Cysltr1
ENSMUSG00000112481	6.96884	-4.27911	1.22786	-3.48502	0.000492108	0.00348551	Gm29684
ENSMUSG00000049154	1.81744	-4.27011	1.86765	-2.28636	0.0222334	NA	Fam183b
ENSMUSG00000116289	1.80029	-4.25842	1.8362	-2.31914	0.0203872	NA	NA
ENSMUSG00000038973	1.79543	-4.25533	1.86371	-2.28325	0.0224155	NA	Cldnd2
ENSMUSG00000065642	1.77815	-4.24351	1.84005	-2.30619	0.0210999	NA	Snora69
ENSMUSG00000103253	1.77329	-4.24029	1.82731	-2.32051	0.0203132	NA	NA
ENSMUSG00000050914	191.472	-4.23415	0.257518	-16.4421	9.55083e-61	2.86739e-58	Ankrd37
ENSMUSG00000102593	1.75857	-4.23031	1.84355	-2.29465	0.021753	NA	NA
ENSMUSG00000109684	1.74871	-4.22351	1.85355	-2.2786	0.0226906	NA	NA
ENSMUSG00000027670	3.55607	-4.2101	1.52154	-2.767	0.00565756	NA	Ocstamp
ENSMUSG00000025161	4372.25	-4.17553	0.0912208	-45.7739	0	0	Slc16a3
ENSMUSG00000115862	3.38079	-4.13826	1.5371	-2.69225	0.00709713	NA	NA
ENSMUSG00000120260	1.65242	-4.13272	1.91997	-2.15249	0.0313589	NA	NA
ENSMUSG00000098488	1.64756	-4.12913	1.91319	-2.15824	0.0309093	NA	Pla2g4b
ENSMUSG00000022468	1.63771	-4.12166	1.88808	-2.18299	0.0290363	NA	Endou
ENSMUSG00000045094	1.63771	-4.12166	1.88808	-2.18299	0.0290363	NA	Arhgef37
ENSMUSG00000040775	1.62542	-4.1126	1.8907	-2.17518	0.0296168	NA	Gm9772
ENSMUSG00000096959	1.62056	-4.10904	1.87805	-2.18793	0.0286744	NA	4930509G22Rik
ENSMUSG00000024600	1.60827	-4.09995	1.88069	-2.18002	0.0292559	NA	Slc27a6
ENSMUSG00000117861	1.59113	-4.087	1.92581	-2.12223	0.0338187	NA	NA
ENSMUSG00000120341	1.59113	-4.087	1.92581	-2.12223	0.0338187	NA	NA
ENSMUSG00000026890	3.28461	-4.08626	1.57306	-2.59765	0.00938645	NA	Lhx6
ENSMUSG00000086255	1.57884	-4.0776	1.93658	-2.10556	0.0352423	NA	NA
ENSMUSG00000035148	1.57641	-4.07491	2.0527	-1.98515	0.0471278	NA	Gpr33
ENSMUSG00000057914	20.9737	-4.06171	0.684418	-5.93455	2.94645e-09	6.51807e-08	Cacnb2
ENSMUSG00000034842	3.2089	-4.05604	1.56217	-2.59641	0.00942029	NA	Art3
ENSMUSG00000112762	11.4811	-3.99414	0.934144	-4.27572	1.9052e-05	0.000197237	4930459C07Rik
ENSMUSG00000024186	8.55367	-3.99327	1.05989	-3.76764	0.000164795	0.00134908	Rgs11
ENSMUSG00000063129	3.04833	-3.98188	1.57331	-2.53089	0.0113774	NA	Aldoart2
ENSMUSG00000031214	1.48498	-3.97882	1.9722	-2.01745	0.0436484	NA	Ophn1
ENSMUSG00000087016	1.48498	-3.97882	1.9722	-2.01745	0.0436484	NA	NA
ENSMUSG00000113010	1.46783	-3.96468	1.94391	-2.03954	0.0413961	NA	Gm34084
ENSMUSG00000016982	1.46297	-3.96088	1.99441	-1.98599	0.0470348	NA	Pom121l2
ENSMUSG00000113977	1.45555	-3.9546	1.93838	-2.04016	0.0413341	NA	NA
ENSMUSG00000026805	1.44083	-3.94249	1.95122	-2.02053	0.0433285	NA	Barhl1
ENSMUSG00000034059	1.42611	-3.93005	1.98856	-1.97633	0.048117	NA	Ypel4
ENSMUSG00000106123	1.42611	-3.93005	1.98856	-1.97633	0.048117	NA	NA
ENSMUSG00000111656	1.42611	-3.93005	1.98856	-1.97633	0.048117	NA	NA
ENSMUSG00000035860	10.9507	-3.90912	0.925065	-4.22578	2.38114e-05	0.000240418	Cdhr3
ENSMUSG00000020399	2.87103	-3.89194	1.60844	-2.41969	0.0155335	NA	Havcr2
ENSMUSG00000054978	13.1383	-3.85828	0.818957	-4.71121	2.46256e-06	3.13923e-05	Kbtbd13
ENSMUSG00000021367	20.8681	-3.84739	0.659189	-5.83655	5.32933e-09	1.11681e-07	Edn1
ENSMUSG00000009248	5.27214	-3.84248	1.34284	-2.86145	0.00421706	NA	Ascl2
ENSMUSG00000020646	85.9607	-3.83727	0.346335	-11.0797	1.57448e-28	1.60849e-26	Mboat2
ENSMUSG00000117062	2.76746	-3.82989	1.61037	-2.37827	0.0173941	NA	NA
ENSMUSG00000106333	2.73314	-3.81099	1.61882	-2.35418	0.0185635	NA	4930428O21Rik
ENSMUSG00000055493	2.72615	-3.80647	1.61839	-2.35201	0.0186722	NA	Epm2a
ENSMUSG00000117627	4.99324	-3.77181	1.32413	-2.84851	0.00439241	NA	NA
ENSMUSG00000044313	7.38983	-3.75347	1.07657	-3.48651	0.000489366	0.00346776	Mab21l3
ENSMUSG00000031765	599.018	-3.74974	0.144039	-26.0329	2.10289e-149	1.62819e-146	Mt1
ENSMUSG00000071537	2.60741	-3.73451	1.63419	-2.28523	0.0222991	NA	Klrg2
ENSMUSG00000118550	2.54844	-3.70943	1.64925	-2.24917	0.0245018	NA	NA
ENSMUSG00000114708	16.4713	-3.69039	0.717866	-5.14078	2.73598e-07	4.22783e-06	NA
ENSMUSG00000041481	58.7838	-3.68181	0.398845	-9.23118	2.67674e-20	1.82304e-18	Serpina3g
ENSMUSG00000018830	6.93323	-3.6645	1.08449	-3.37902	0.000727448	0.00487762	Myh11
ENSMUSG00000067780	2.46012	-3.64219	1.83661	-1.98311	0.0473556	NA	Pi15
ENSMUSG00000018914	59.2667	-3.63622	0.389464	-9.33647	9.95967e-21	6.97699e-19	Il3
ENSMUSG00000120051	2.42028	-3.62603	1.66167	-2.18216	0.0290978	NA	NA
ENSMUSG00000041566	2.41283	-3.61771	1.7908	-2.02016	0.0433667	NA	Tssk1
ENSMUSG00000060621	2.40598	-3.61324	1.66713	-2.16734	0.0302091	NA	Nkpd1
ENSMUSG00000053318	2.40355	-3.6119	1.67908	-2.15112	0.0314668	NA	Slamf8
ENSMUSG00000069376	4.29392	-3.55076	1.37827	-2.57624	0.00998807	NA	Gm5507
ENSMUSG00000118217	2.31226	-3.54356	1.76726	-2.00511	0.0449512	NA	Gm6951
ENSMUSG00000105719	2.28724	-3.53064	1.69681	-2.08075	0.0374569	NA	NA
ENSMUSG00000064919	2.29011	-3.53063	1.69637	-2.08128	0.0374079	NA	Gm22572
ENSMUSG00000097604	23.0475	-3.50522	0.59224	-5.91858	3.24726e-09	7.10869e-08	NA
ENSMUSG00000041075	149.706	-3.49321	0.244205	-14.3044	2.05467e-46	3.97715e-44	Fzd7
ENSMUSG00000047261	26.6703	-3.46864	0.554246	-6.25831	3.89174e-10	9.65452e-09	Gap43
ENSMUSG00000035273	24.2333	-3.44265	0.564177	-6.10207	1.04702e-09	2.44875e-08	Hpse
ENSMUSG00000043050	4.0253	-3.43467	1.40523	-2.44421	0.0145169	NA	Tnp2
ENSMUSG00000038451	73.5776	-3.42656	0.339016	-10.1074	5.12458e-24	4.25919e-22	Spsb2
ENSMUSG00000036832	33.987	-3.42605	0.471624	-7.26436	3.74798e-13	1.34479e-11	Lpar3
ENSMUSG00000120171	2.13198	-3.42398	1.72625	-1.98348	0.0473141	NA	NA
ENSMUSG00000031762	241.039	-3.42385	0.191762	-17.8547	2.65825e-71	9.31084e-69	Mt2
ENSMUSG00000018906	215.514	-3.40723	0.201783	-16.8856	5.74177e-64	1.87705e-61	P4ha2
ENSMUSG00000028654	2.09269	-3.40042	1.71783	-1.97949	0.0477606	NA	Mycl
ENSMUSG00000031104	3.86277	-3.39268	1.39294	-2.43563	0.0148659	NA	Rab33a
ENSMUSG00000006221	13.3441	-3.34333	0.757667	-4.41267	1.02105e-05	0.000113022	Hspb7
ENSMUSG00000022218	14.7305	-3.29378	0.71376	-4.61469	3.93691e-06	4.73943e-05	Tgm1
ENSMUSG00000118101	9.02056	-3.27424	0.911592	-3.59178	0.000328427	0.00246002	NA
ENSMUSG00000055170	447.765	-3.26869	0.878751	-3.7197	0.000199463	0.00158955	Ifng
ENSMUSG00000001663	78.6828	-3.24792	0.322697	-10.0649	7.89471e-24	6.45217e-22	Gstt1
ENSMUSG00000026628	814.92	-3.20717	0.115809	-27.6935	8.37044e-169	8.79554e-166	Atf3
ENSMUSG00000111394	106.05	-3.15135	0.288642	-10.9178	9.47207e-28	9.35192e-26	NA
ENSMUSG00000084020	6.63252	-3.12907	1.01453	-3.08426	0.00204056	0.0115147	NA
ENSMUSG00000052117	137.405	-3.1246	0.232882	-13.4171	4.79988e-41	8.21058e-39	D630039A03Rik
ENSMUSG00000051606	3.30883	-3.10968	1.45285	-2.1404	0.0323226	NA	NA
ENSMUSG00000081957	3.28712	-3.09609	1.45195	-2.13237	0.0329765	NA	NA
ENSMUSG00000023456	13380.7	-3.09261	0.0718664	-43.0328	0	0	Tpi1
ENSMUSG00000032327	14.3535	-3.07345	0.707405	-4.34469	1.39473e-05	0.000149004	Stra6
ENSMUSG00000022805	3.19552	-3.06826	1.49242	-2.0559	0.0397919	NA	Cfap91
ENSMUSG00000046794	121.352	-3.06669	0.247036	-12.414	2.19487e-35	3.10468e-33	Ppp1r3b
ENSMUSG00000116678	19.1276	-3.06534	0.605202	-5.06499	4.08423e-07	6.11222e-06	NA
ENSMUSG00000067889	26.9053	-3.04899	0.508327	-5.99808	1.99665e-09	4.53983e-08	Sptbn2
ENSMUSG00000037060	50.3097	-3.04666	0.365961	-8.3251	8.42579e-17	4.28899e-15	Cavin3
ENSMUSG00000066363	326.491	-3.04021	0.84991	-3.57709	0.00034744	0.0025801	Serpina3f
ENSMUSG00000110588	231.434	-3.0357	0.186529	-16.2747	1.49369e-59	4.14598e-57	NA
ENSMUSG00000024922	6.17368	-3.02801	1.04323	-2.90254	0.0037015	0.0191129	Ovol1
ENSMUSG00000054161	3.09469	-3.01931	1.43954	-2.0974	0.0359578	NA	Fam83e
ENSMUSG00000031803	47.1552	-2.98746	0.374341	-7.98059	1.45638e-15	6.57202e-14	B3gnt3
ENSMUSG00000043953	3.04809	-2.98647	1.45792	-2.04844	0.0405165	NA	Ccrl2
ENSMUSG00000035370	4.54702	-2.98409	1.17294	-2.54412	0.0109555	NA	NA
ENSMUSG00000070443	6.06317	-2.97292	1.05889	-2.80759	0.00499133	0.0243057	Gm10291
ENSMUSG00000080994	4.42588	-2.95075	1.23825	-2.38299	0.0171724	NA	Gm13464
ENSMUSG00000091412	51.7802	-2.94873	0.36104	-8.1673	3.15358e-16	1.51115e-14	NA
ENSMUSG00000055446	8.90546	-2.94728	0.870835	-3.38444	0.000713247	0.0047999	NA
ENSMUSG00000111088	2.94653	-2.94371	1.49377	-1.97066	0.0487632	NA	NA
ENSMUSG00000027718	2.92438	-2.93333	1.4623	-2.00597	0.0448597	NA	Il21
ENSMUSG00000005125	445.37	-2.92909	0.149253	-19.6251	9.44656e-86	3.65706e-83	Ndrg1
ENSMUSG00000003452	8.74402	-2.92737	0.846427	-3.4585	0.000543183	0.00378351	Bicd1
ENSMUSG00000092981	5.8883	-2.92542	1.08585	-2.69414	0.00705709	0.0319929	Mir5125
ENSMUSG00000050473	23.3398	-2.92509	0.526163	-5.55929	2.70868e-08	5.05678e-07	Slc35d3
ENSMUSG00000026630	20.5075	-2.92359	0.557928	-5.24009	1.60497e-07	2.60892e-06	Batf3
ENSMUSG00000115154	5.84175	-2.92256	1.03027	-2.83668	0.00455852	0.0226785	NA
ENSMUSG00000105742	2.92237	-2.91405	1.4573	-1.99963	0.0455405	NA	NA
ENSMUSG00000004328	17.1075	-2.87648	0.619034	-4.64672	3.37252e-06	4.14479e-05	Hif3a
ENSMUSG00000119956	22.5612	-2.8697	0.549752	-5.21999	1.78929e-07	2.88622e-06	NA
ENSMUSG00000067279	4.25838	-2.86835	1.25015	-2.29441	0.0217668	NA	Ppp1r3c
ENSMUSG00000026787	4.27398	-2.86618	1.22033	-2.3487	0.0188389	NA	Gad2
ENSMUSG00000032092	45.0537	-2.86576	0.395961	-7.2375	4.57045e-13	1.60851e-11	Mpzl2
ENSMUSG00000020014	115.632	-2.86538	0.240857	-11.8966	1.23276e-32	1.5908e-30	Cfap54
ENSMUSG00000002799	142.689	-2.83328	0.222575	-12.7295	4.05373e-37	5.96345e-35	Jag2
ENSMUSG00000106755	35.9813	-2.83231	0.415829	-6.81124	9.67606e-12	2.88731e-10	NA
ENSMUSG00000020277	4625.92	-2.80162	0.0722778	-38.7618	0	0	Pfkl
ENSMUSG00000086894	4.05727	-2.79401	1.25398	-2.2281	0.0258736	NA	Gm15708
ENSMUSG00000105600	5.28056	-2.76091	1.08942	-2.5343	0.0112674	NA	NA
ENSMUSG00000073433	46.0647	-2.74946	0.367583	-7.47984	7.44133e-14	2.88837e-12	Arhgdig
ENSMUSG00000106535	3.95083	-2.74913	1.23111	-2.23305	0.0255457	NA	NA
ENSMUSG00000049109	653.322	-2.74792	0.128841	-21.328	6.2439e-101	2.87044e-98	Themis
ENSMUSG00000023959	7.86004	-2.7373	0.875483	-3.12662	0.00176831	0.0102234	Clic5
ENSMUSG00000021675	24.4528	-2.73291	0.540833	-5.05315	4.34587e-07	6.45778e-06	F2rl2
ENSMUSG00000090126	95.6519	-2.72522	0.264368	-10.3084	6.4541e-25	5.58508e-23	NA
ENSMUSG00000092021	3.88907	-2.7215	1.29104	-2.10799	0.0350317	NA	Gbp11
ENSMUSG00000025938	6.43761	-2.72068	0.962119	-2.8278	0.00468697	0.0231765	Slco5a1
ENSMUSG00000043421	287.341	-2.69048	0.185882	-14.4742	1.76443e-47	3.55569e-45	Hilpda
ENSMUSG00000045065	5.03673	-2.68236	1.09383	-2.45225	0.0141965	NA	NA
ENSMUSG00000003541	81.6872	-2.67901	0.294757	-9.08888	1.0006e-19	6.36697e-18	Ier3
ENSMUSG00000118361	3.76911	-2.66867	1.25524	-2.12601	0.033502	NA	NA
ENSMUSG00000018916	34.4808	-2.6542	0.45142	-5.87967	4.11091e-09	8.77731e-08	Csf2
ENSMUSG00000054383	3.75679	-2.6538	1.26301	-2.10116	0.0356265	NA	Pnma1
ENSMUSG00000055541	6.18371	-2.64383	0.963112	-2.74508	0.00604952	0.0282287	Lair1
ENSMUSG00000042826	4.85669	-2.62577	1.08413	-2.422	0.0154354	NA	Fgf11
ENSMUSG00000107742	4.87879	-2.61591	1.10666	-2.36379	0.0180892	NA	NA
ENSMUSG00000024810	25.2933	-2.60342	1.04144	-2.49982	0.0124258	0.0508066	Il33
ENSMUSG00000039114	4343.28	-2.60034	0.274286	-9.48039	2.53336e-21	1.83588e-19	Nrn1
ENSMUSG00000109735	27.3298	-2.58901	0.470734	-5.49995	3.79902e-08	6.84894e-07	NA
ENSMUSG00000118051	184.444	-2.58187	0.213059	-12.1181	8.46843e-34	1.14293e-31	Gm8714
ENSMUSG00000003824	303.604	-2.57718	0.188982	-13.6371	2.40826e-42	4.32047e-40	Syce2
ENSMUSG00000023951	286.349	-2.57356	0.158095	-16.2786	1.40139e-59	3.96459e-57	Vegfa
ENSMUSG00000038264	850.461	-2.57207	0.423256	-6.07686	1.22562e-09	2.85738e-08	Sema7a
ENSMUSG00000005705	4.76822	-2.57059	1.11002	-2.31581	0.0205685	NA	Agrp
ENSMUSG00000056671	600.044	-2.56205	0.124051	-20.6532	9.13614e-95	3.84005e-92	Prelid2
ENSMUSG00000037818	133.904	-2.54953	0.216189	-11.7931	4.23707e-32	5.15137e-30	Abhd18
ENSMUSG00000046314	28.8931	-2.54241	0.469196	-5.41865	6.00494e-08	1.0504e-06	Stxbp6
ENSMUSG00000116398	14.9794	-2.53461	0.632108	-4.00978	6.0776e-05	0.000557057	NA
ENSMUSG00000110774	6.9688	-2.53313	0.927953	-2.72981	0.00633712	0.0292977	NA
ENSMUSG00000002944	20.7143	-2.52811	0.546653	-4.6247	3.75135e-06	4.5573e-05	Cd36
ENSMUSG00000100985	4.6488	-2.52628	1.20441	-2.09752	0.0359479	NA	Gm10640
ENSMUSG00000021573	43.4092	-2.51389	0.362435	-6.93612	4.03023e-12	1.26415e-10	Tppp
ENSMUSG00000110692	6.84542	-2.5124	0.895584	-2.80533	0.00502659	0.0243973	NA
ENSMUSG00000085888	10.2408	-2.50977	0.772731	-3.24793	0.00116249	0.0072158	Gm12224
ENSMUSG00000034829	3.40921	-2.5072	1.2596	-1.99047	0.0465388	NA	Nxnl1
ENSMUSG00000091479	155.141	-2.50266	0.207512	-12.0603	1.7118e-33	2.26868e-31	NA
ENSMUSG00000051331	22.4899	-2.50159	0.523114	-4.78212	1.73459e-06	2.31034e-05	Cacna1c
ENSMUSG00000060128	5.5773	-2.49137	1.06232	-2.34521	0.0190163	NA	Gm2710
ENSMUSG00000067206	65.3413	-2.48616	0.320352	-7.76072	8.44497e-15	3.56994e-13	Lrrc66
ENSMUSG00000079019	13.4129	-2.47788	0.744262	-3.32931	0.000870602	0.00566939	Insl3
ENSMUSG00000027716	8.88057	-2.4733	0.800909	-3.08812	0.00201427	0.0113881	Trpc3
ENSMUSG00000026211	5.452	-2.45955	1.05522	-2.33085	0.0197612	NA	Obsl1
ENSMUSG00000041842	4.41321	-2.45273	1.10885	-2.21195	0.0269701	NA	Fhdc1
ENSMUSG00000082632	11.048	-2.45219	0.720009	-3.40578	0.000659757	0.00447679	NA
ENSMUSG00000025791	1334.38	-2.44789	0.092341	-26.5092	7.59301e-155	6.9813e-152	Pgm1
ENSMUSG00000049804	111.856	-2.44721	0.237664	-10.2969	7.2754e-25	6.22258e-23	Armcx4
ENSMUSG00000063524	36242.7	-2.44455	0.0750412	-32.5761	8.95388e-233	1.64651e-229	Eno1
ENSMUSG00000111229	19.792	-2.44417	0.551102	-4.43506	9.20454e-06	0.000103365	NA
ENSMUSG00000049303	16.285	-2.43731	0.595457	-4.09317	4.2551e-05	0.000406472	Syt12
ENSMUSG00000085585	17.4159	-2.43595	0.589066	-4.13528	3.54516e-05	0.000344396	NA
ENSMUSG00000092257	7.65751	-2.43527	0.852442	-2.85681	0.00427917	0.0215364	Gm2308
ENSMUSG00000006235	9.72646	-2.43461	0.779613	-3.12284	0.00179114	0.0103331	Epor
ENSMUSG00000061878	14.0574	-2.42903	0.633865	-3.8321	0.000127055	0.00106501	Sphk1
ENSMUSG00000027358	13.9959	-2.41666	0.691167	-3.49649	0.000471414	0.0033616	Bmp2
ENSMUSG00000064125	40.975	-2.41273	0.407225	-5.9248	3.12673e-09	6.86527e-08	Prr36
ENSMUSG00000031216	9.62163	-2.40929	0.764961	-3.14956	0.00163519	0.00957231	Stard8
ENSMUSG00000077711	6.45353	-2.40716	0.956668	-2.51619	0.0118631	0.0488981	NA
ENSMUSG00000020641	5.3706	-2.39995	1.04544	-2.29562	0.0216973	NA	Rsad2
ENSMUSG00000114859	7.39071	-2.38892	0.882477	-2.70706	0.00678829	0.0310474	NA
ENSMUSG00000046691	4.25559	-2.38114	1.1541	-2.06321	0.0390929	NA	Chtf8
ENSMUSG00000090619	8.43013	-2.37371	0.856419	-2.77167	0.00557702	0.0264571	Vmn2r60
ENSMUSG00000028645	3325.63	-2.36336	0.0696837	-33.9155	3.93347e-252	8.26646e-249	Slc2a1
ENSMUSG00000085498	5.20851	-2.35912	1.01755	-2.31842	0.0204266	NA	Gm14023
ENSMUSG00000032089	216.177	-2.35895	0.471113	-5.00719	5.523e-07	8.02061e-06	Il10ra
ENSMUSG00000018341	432.504	-2.35327	0.564107	-4.17167	3.02381e-05	0.000298545	Il12rb2
ENSMUSG00000021453	273.097	-2.34977	0.157216	-14.9462	1.64948e-50	3.6766e-48	Gadd45g
ENSMUSG00000052713	234.115	-2.34852	0.166322	-14.1203	2.8459e-45	5.29951e-43	Zfp608
ENSMUSG00000031438	83.5807	-2.33914	0.269859	-8.66802	4.39681e-18	2.43164e-16	Rnf128
ENSMUSG00000070490	8.2424	-2.33704	0.835104	-2.7985	0.00513399	0.0248033	Gm10293
ENSMUSG00000000056	210.56	-2.33595	0.175999	-13.2726	3.34004e-40	5.39949e-38	Narf
ENSMUSG00000018459	21.5436	-2.33488	0.518872	-4.49991	6.79813e-06	7.82083e-05	Slc13a3
ENSMUSG00000118097	15.4575	-2.33376	0.627533	-3.71894	0.000200059	0.00159343	NA
ENSMUSG00000030109	4.06065	-2.33355	1.16592	-2.00147	0.045342	NA	Slc6a12
ENSMUSG00000085505	569.595	-2.33179	0.115304	-20.223	6.1463e-91	2.51162e-88	NA
ENSMUSG00000021200	46.2064	-2.33132	0.367635	-6.34139	2.27701e-10	5.85615e-09	Asb2
ENSMUSG00000114687	39.9644	-2.33125	0.393075	-5.9308	3.01459e-09	6.64882e-08	NA
ENSMUSG00000022197	8.18681	-2.31953	0.820474	-2.82706	0.00469781	0.0232223	Pdzd2
ENSMUSG00000120847	4.06846	-2.31468	1.13644	-2.03678	0.0416724	NA	NA
ENSMUSG00000061718	10.2275	-2.31275	0.767053	-3.01511	0.00256885	0.0140326	Ppp1r1b
ENSMUSG00000059434	5.08519	-2.30779	1.01846	-2.26596	0.0234538	NA	Gckr
ENSMUSG00000032231	1054.99	-2.30531	0.106581	-21.6297	9.43189e-104	4.62508e-101	Anxa2
ENSMUSG00000082330	4.98195	-2.29424	1.09255	-2.0999	0.0357379	NA	NA
ENSMUSG00000020303	155.276	-2.28049	0.552456	-4.12792	3.66064e-05	0.000354754	Stc2
ENSMUSG00000000530	67.7127	-2.27626	0.297572	-7.64945	2.01841e-14	8.22514e-13	Acvrl1
ENSMUSG00000020102	5.9065	-2.26518	0.952541	-2.37804	0.0174051	0.0662069	Slc16a7
ENSMUSG00000112120	11.7347	-2.25313	0.680005	-3.3134	0.000921706	0.00594703	NA
ENSMUSG00000037411	108.59	-2.23481	0.227147	-9.83861	7.67668e-23	5.97522e-21	Serpine1
ENSMUSG00000024665	295.436	-2.2331	0.188521	-11.8454	2.27362e-32	2.83451e-30	Fads2
ENSMUSG00000049493	11.4866	-2.22394	0.701542	-3.17007	0.001524	0.00903651	Pls1
ENSMUSG00000037280	1270.36	-2.21922	0.0861957	-25.7463	3.54974e-146	2.48668e-143	Galnt6
ENSMUSG00000019944	13.3954	-2.21799	0.641582	-3.45707	0.000546089	0.00379835	Rhobtb1
ENSMUSG00000032041	21.034	-2.21287	0.515124	-4.2958	1.74067e-05	0.000181353	Tirap
ENSMUSG00000036661	31.6985	-2.21138	0.424201	-5.21305	1.85763e-07	2.99317e-06	Dennd3
ENSMUSG00000071343	15.2673	-2.20235	0.607593	-3.62471	0.000289282	0.00220241	Gm10327
ENSMUSG00000022754	17.217	-2.2009	0.562168	-3.91503	9.03923e-05	0.000786841	Tmem45a
ENSMUSG00000020333	30.0066	-2.17255	0.435558	-4.98797	6.10179e-07	8.76595e-06	Acsl6
ENSMUSG00000021420	2207.2	-2.17107	0.117427	-18.4887	2.54509e-76	9.6002e-74	Fars2
ENSMUSG00000097148	9.35688	-2.16844	0.760388	-2.85175	0.0043479	0.0218077	NA
ENSMUSG00000038151	14.0228	-2.16566	0.622115	-3.48112	0.000499321	0.00352641	Prdm1
ENSMUSG00000096948	12.0694	-2.16475	0.668393	-3.23873	0.00120062	0.00739666	Gm4221
ENSMUSG00000017314	253.504	-2.16006	0.16114	-13.4048	5.66593e-41	9.52303e-39	Mpp2
ENSMUSG00000022885	1616.4	-2.15519	0.262922	-8.19706	2.46339e-16	1.19207e-14	St6gal1
ENSMUSG00000055313	23.2029	-2.15459	0.486373	-4.42991	9.42709e-06	0.000105622	Pgbd1
ENSMUSG00000044628	7.28452	-2.14511	0.880945	-2.43501	0.0148916	0.0587477	Rnf208
ENSMUSG00000038517	514.191	-2.13776	0.706042	-3.0278	0.00246337	0.0135674	Tbkbp1
ENSMUSG00000090062	406.048	-2.11605	0.127518	-16.5941	7.68303e-62	2.40479e-59	NA
ENSMUSG00000064193	302.515	-2.11449	0.170115	-12.4298	1.80125e-35	2.57264e-33	NA
ENSMUSG00000006403	13.6357	-2.11223	0.677846	-3.1161	0.00183261	0.010531	Adamts4
ENSMUSG00000023266	8.02954	-2.10718	0.856389	-2.46053	0.013873	0.0555034	Frs3
ENSMUSG00000054074	6.31827	-2.10021	0.905837	-2.31853	0.0204207	0.0747032	Skida1
ENSMUSG00000112907	35.1364	-2.09897	0.405616	-5.17477	2.28192e-07	3.60573e-06	NA
ENSMUSG00000104156	6.28673	-2.09632	0.924513	-2.26749	0.0233606	0.0828011	NA
ENSMUSG00000028978	8.95644	-2.09113	0.747271	-2.79835	0.00513638	0.0248067	Nos3
ENSMUSG00000109695	6.275	-2.09102	0.947932	-2.20587	0.0273928	0.0933031	Gm31166
ENSMUSG00000030695	21572.6	-2.08891	0.0753737	-27.714	4.7383e-169	5.36194e-166	Aldoa
ENSMUSG00000058966	3909.25	-2.08312	0.0770607	-27.0321	6.19555e-161	6.07618e-158	Tlcd3b
ENSMUSG00000062785	19.6438	-2.08274	0.527917	-3.9452	7.97335e-05	0.000705752	Kcnc3
ENSMUSG00000039676	88.9384	-2.07598	0.25986	-7.98884	1.36218e-15	6.18489e-14	Capsl
ENSMUSG00000073198	17.7622	-2.07589	0.572788	-3.62419	0.000289864	0.00220406	Bnip3l-ps
ENSMUSG00000006494	1325.23	-2.07478	0.0838568	-24.7419	3.78804e-135	2.32191e-132	Pdk1
ENSMUSG00000020401	557.347	-2.07203	0.375848	-5.51296	3.52852e-08	6.40841e-07	Garin3
ENSMUSG00000041216	6.20516	-2.06846	0.908152	-2.27766	0.0227466	0.080984	Clvs1
ENSMUSG00000085396	10.5844	-2.06511	0.726195	-2.84374	0.00445877	0.0222575	Firre
ENSMUSG00000105558	59.6909	-2.05562	0.302705	-6.79085	1.11475e-11	3.30627e-10	NA
ENSMUSG00000100794	14.8921	-2.05475	0.612649	-3.35388	0.000796878	0.00525925	NA
ENSMUSG00000020828	20.1017	-2.05471	0.513154	-4.00408	6.22591e-05	0.00056886	Pld2
ENSMUSG00000032392	60.2565	-2.05218	0.304406	-6.74159	1.56662e-11	4.57274e-10	Parp16
ENSMUSG00000005447	160.121	-2.05067	0.194344	-10.5517	4.98694e-26	4.52857e-24	Pafah1b3
ENSMUSG00000041957	23.499	-2.04715	0.488041	-4.19463	2.7332e-05	0.000270762	Pkp2
ENSMUSG00000062127	21.8376	-2.04572	0.553892	-3.69335	0.000221321	0.00174389	Cttnbp2nl
ENSMUSG00000078300	7.88313	-2.04417	0.80546	-2.53789	0.0111522	0.0465816	Gm2606
ENSMUSG00000009418	40.73	-2.03547	0.356703	-5.70634	1.15431e-08	2.26113e-07	Nav1
ENSMUSG00000104913	406.08	-2.0287	0.140839	-14.4044	4.85378e-47	9.52053e-45	NA
ENSMUSG00000061086	13.8706	-2.01428	0.691963	-2.91097	0.00360306	0.0186933	Myl4
ENSMUSG00000079018	65.7377	-2.00766	0.664828	-3.01981	0.0025293	0.0138624	Ly6c1
ENSMUSG00000021831	2338.37	-2.00155	0.0764159	-26.1929	3.20484e-151	2.61925e-148	Ero1a
ENSMUSG00000085213	10.1365	-1.99881	0.717967	-2.78399	0.00536945	0.0257045	NA
ENSMUSG00000030247	73.2134	-1.99598	0.276703	-7.21343	5.4561e-13	1.89303e-11	Kcnj8
ENSMUSG00000005640	5.86603	-1.99583	0.961214	-2.07637	0.0378601	0.11911	Insrr
ENSMUSG00000038143	24.6528	-1.99229	0.528448	-3.77008	0.000163196	0.00133748	Stox2
ENSMUSG00000028545	21.9078	-1.99022	0.499407	-3.98517	6.7432e-05	0.000608958	Bend5
ENSMUSG00000000628	2515.3	-1.98153	0.0762326	-25.9932	5.9132e-149	4.34945e-146	Hk2
ENSMUSG00000024968	18.45	-1.96164	0.59174	-3.31504	0.000916291	0.00592508	Rcor2
ENSMUSG00000114241	11.6331	-1.95998	0.656907	-2.98365	0.00284836	0.0152984	Gm30108
ENSMUSG00000024936	18.3645	-1.95965	0.623165	-3.14467	0.00166275	0.00968741	Kcnk7
ENSMUSG00000025203	8246.11	-1.95963	0.188941	-10.3717	3.33648e-25	2.9391e-23	Scd2
ENSMUSG00000053846	239.455	-1.95905	0.169083	-11.5863	4.83412e-31	5.55584e-29	Lipg
ENSMUSG00000111336	8.2773	-1.95758	0.850662	-2.30124	0.0213781	0.0772711	NA
ENSMUSG00000055069	8.16444	-1.95588	0.8888	-2.20059	0.0277652	0.0942441	Rab39
ENSMUSG00000020961	28.1054	-1.95577	0.462649	-4.22733	2.36476e-05	0.000238928	Ston2
ENSMUSG00000001247	11.5818	-1.94785	0.656288	-2.96799	0.00299759	0.0160063	Lsr
ENSMUSG00000031609	539.032	-1.94304	0.114002	-17.044	3.87268e-65	1.32491e-62	Sap30
ENSMUSG00000019916	1868.35	-1.94201	0.0779814	-24.9035	6.81808e-137	4.3609e-134	P4ha1
ENSMUSG00000050222	18.9337	-1.94188	0.550485	-3.52759	0.00041936	0.00303903	Il17d
ENSMUSG00000083836	62.6604	-1.94038	0.298859	-6.49262	8.43573e-11	2.2687e-09	NA
ENSMUSG00000020614	26.3871	-1.93825	0.440009	-4.40502	1.05776e-05	0.000116647	Fam20a
ENSMUSG00000004952	37.7981	-1.93811	0.383023	-5.06002	4.19211e-07	6.24823e-06	Rasa4
ENSMUSG00000038295	91.2879	-1.93633	0.241182	-8.02851	9.86629e-16	4.50755e-14	Atg9b
ENSMUSG00000046031	223.169	-1.93504	0.165741	-11.6751	1.70891e-31	2.0274e-29	Calhm6
ENSMUSG00000022639	152.098	-1.93441	0.220749	-8.76296	1.90195e-18	1.07614e-16	NA
ENSMUSG00000033316	35.0035	-1.93066	0.410494	-4.70326	2.56039e-06	3.23869e-05	Galnt9
ENSMUSG00000096917	370.957	-1.92864	0.144793	-13.32	1.77071e-40	2.89433e-38	2500002B13Rik
ENSMUSG00000032294	34308.7	-1.92851	0.0665934	-28.9595	2.12771e-184	2.84552e-181	Pkm
ENSMUSG00000064247	246.678	-1.92391	0.165608	-11.6172	3.36921e-31	3.93368e-29	Plcxd1
ENSMUSG00000002228	68.8784	-1.91105	0.288551	-6.62292	3.52177e-11	9.81228e-10	Ppm1j
ENSMUSG00000098156	20.9661	-1.90963	0.494167	-3.86435	0.000111384	0.0009477	NA
ENSMUSG00000070601	8.08602	-1.90959	0.829145	-2.30309	0.021274	0.0770084	Vmn2r84
ENSMUSG00000017009	107.4	-1.90836	0.237109	-8.04845	8.38508e-16	3.85478e-14	Sdc4
ENSMUSG00000031342	250.991	-1.90698	0.348776	-5.46765	4.56045e-08	8.1123e-07	Gpm6b
ENSMUSG00000038059	67.6772	-1.9051	0.279833	-6.80798	9.89782e-12	2.94751e-10	Smim3
ENSMUSG00000027078	155.7	-1.9018	0.189775	-10.0214	1.22813e-23	9.8727e-22	Ube2l6
ENSMUSG00000059040	191.824	-1.8987	0.216732	-8.76059	1.94239e-18	1.09481e-16	Eno1b
ENSMUSG00000062070	27493	-1.89619	0.0648364	-29.2458	5.08186e-188	7.47592e-185	Pgk1
ENSMUSG00000022051	1623.03	-1.88703	0.0830284	-22.7276	2.39144e-114	1.30298e-111	Bnip3l
ENSMUSG00000024066	268.467	-1.88406	0.166885	-11.2896	1.47752e-29	1.58655e-27	Xdh
ENSMUSG00000111013	6.34928	-1.88187	0.887245	-2.12103	0.0339194	0.109427	NA
ENSMUSG00000028207	42.8119	-1.88166	0.359716	-5.23097	1.68624e-07	2.73196e-06	Asph
ENSMUSG00000004151	36.8273	-1.88158	0.42901	-4.38587	1.15523e-05	0.000126073	Etv1
ENSMUSG00000059343	24.6076	-1.87996	0.455638	-4.12599	3.69139e-05	0.000357264	Aldoart1
ENSMUSG00000081373	7.91937	-1.87783	0.789471	-2.37859	0.0173788	0.0661474	NA
ENSMUSG00000033460	8.71809	-1.87657	0.764644	-2.45417	0.014121	0.0562964	Armcx1
ENSMUSG00000098006	11.0964	-1.87261	0.665229	-2.81499	0.00487787	0.0239194	Gm8565
ENSMUSG00000028128	40.46	-1.87167	0.366929	-5.1009	3.3805e-07	5.12158e-06	F3
ENSMUSG00000112546	76.6459	-1.87085	0.27076	-6.90963	4.85914e-12	1.49859e-10	NA
ENSMUSG00000044005	196.677	-1.86457	0.173225	-10.7639	5.09832e-27	4.8388e-25	Gls2
ENSMUSG00000021214	188.126	-1.86436	0.205339	-9.07945	1.09127e-19	6.86055e-18	Akr1c18
ENSMUSG00000024892	489.814	-1.85961	0.124267	-14.9647	1.24872e-50	2.82614e-48	Pcx
ENSMUSG00000001670	54.6612	-1.84997	0.685937	-2.69701	0.00699662	0.0317775	Tat
ENSMUSG00000097277	10.8467	-1.83048	0.686689	-2.66566	0.00768372	0.0343572	2900076A07Rik
ENSMUSG00000086241	178.733	-1.8169	0.186828	-9.72498	2.35962e-22	1.7893e-20	4930483K19Rik
ENSMUSG00000075511	41.2842	-1.80969	0.379307	-4.77105	1.83265e-06	2.41795e-05	NA
ENSMUSG00000087396	8.41329	-1.80957	0.778461	-2.32455	0.0200959	0.0738227	4933407K13Rik
ENSMUSG00000006930	6.91203	-1.80746	0.847574	-2.13251	0.0329652	0.107219	Hap1
ENSMUSG00000026199	146.422	-1.80603	0.196521	-9.19	3.92823e-20	2.61485e-18	Ankzf1
ENSMUSG00000024548	144.196	-1.80445	0.214318	-8.41951	3.78058e-17	1.96524e-15	Setbp1
ENSMUSG00000027333	317.653	-1.79906	0.161566	-11.1352	8.45967e-29	8.7641e-27	Smox
ENSMUSG00000038412	1151.97	-1.78782	0.097916	-18.2587	1.76433e-74	6.48876e-72	Higd1a
ENSMUSG00000090024	34.8587	-1.78769	0.379758	-4.70745	2.5084e-06	3.17838e-05	NA
ENSMUSG00000055194	34.7829	-1.78442	0.376207	-4.7432	2.10371e-06	2.74358e-05	Actbl2
ENSMUSG00000087185	10.5372	-1.78438	0.677919	-2.63214	0.00848481	0.0372042	Gm13872
ENSMUSG00000011752	4555.11	-1.78394	0.0630217	-28.3067	2.85661e-176	3.50197e-173	Pgam1
ENSMUSG00000030638	32.5183	-1.77926	0.403403	-4.41062	1.03075e-05	0.000113839	Sh3gl3
ENSMUSG00000082424	112.153	-1.77006	0.241377	-7.33316	2.24783e-13	8.26695e-12	Gm13292
ENSMUSG00000026950	15.6605	-1.76714	0.609116	-2.90116	0.00371782	0.019177	Neb
ENSMUSG00000018909	507.999	-1.75867	0.131026	-13.4223	4.47779e-41	7.74973e-39	Arrb1
ENSMUSG00000111856	101.921	-1.75825	0.239653	-7.33663	2.19038e-13	8.09615e-12	NA
ENSMUSG00000037661	20.9533	-1.75813	0.500324	-3.51397	0.000441458	0.00318129	Gpr160
ENSMUSG00000103622	28.1619	-1.75397	0.437242	-4.01144	6.03495e-05	0.000553492	B430319G15Rik
ENSMUSG00000032011	1333.46	-1.7506	0.116966	-14.9668	1.21015e-50	2.78165e-48	Thy1
ENSMUSG00000056978	15.0373	-1.7505	0.646965	-2.70571	0.00681581	0.0311196	Hamp2
ENSMUSG00000040703	16.2907	-1.75034	0.604066	-2.89759	0.00376039	0.0193423	Cyp2s1
ENSMUSG00000012819	212.763	-1.7475	0.197645	-8.84162	9.43383e-19	5.52913e-17	Cdh23
ENSMUSG00000041115	96.2203	-1.74646	0.240863	-7.25084	4.1418e-13	1.46819e-11	Iqsec2
ENSMUSG00000036427	12898.9	-1.74525	0.0753955	-23.1479	1.52606e-118	8.63457e-116	Gpi1
ENSMUSG00000098019	18.4878	-1.73863	0.512647	-3.39148	0.000695174	0.004689	Gm2546
ENSMUSG00000063229	37702.7	-1.73734	0.0738929	-23.5116	3.10254e-122	1.82566e-119	Ldha
ENSMUSG00000078965	15.4074	-1.7373	0.577852	-3.00647	0.002643	0.0143685	Gm12033
ENSMUSG00000089726	61.17	-1.73106	0.296479	-5.83873	5.26005e-09	1.10427e-07	NA
ENSMUSG00000063275	36.4857	-1.7295	0.38108	-4.53841	5.66787e-06	6.59131e-05	Hacd1
ENSMUSG00000032114	206.312	-1.71962	0.178432	-9.6374	5.55799e-22	4.12947e-20	Slc37a4
ENSMUSG00000015766	11.6994	-1.71863	0.649691	-2.6453	0.0081618	0.0361216	Eps8
ENSMUSG00000021338	107.08	-1.71173	0.221577	-7.72522	1.11663e-14	4.69335e-13	Carmil1
ENSMUSG00000042766	39.7041	-1.70024	0.354613	-4.79463	1.62977e-06	2.1796e-05	Trim46
ENSMUSG00000046618	17.353	-1.69819	0.52434	-3.23872	0.00120068	0.00739666	Olfml2a
ENSMUSG00000095123	19.5564	-1.69638	0.504934	-3.35961	0.000780537	0.00517229	NA
ENSMUSG00000031024	47.6498	-1.69556	0.318964	-5.31582	1.06175e-07	1.7815e-06	Dennd2b
ENSMUSG00000023571	91.6147	-1.69529	0.237078	-7.15077	8.6293e-13	2.9116e-11	C1qtnf12
ENSMUSG00000082314	105.403	-1.68794	0.233785	-7.22003	5.19767e-13	1.81622e-11	Gm13296
ENSMUSG00000029217	57.9354	-1.68236	0.296415	-5.67569	1.38133e-08	2.68178e-07	Tec
ENSMUSG00000111079	70.7095	-1.68189	0.272335	-6.1758	6.58298e-10	1.58758e-08	Gm47112
ENSMUSG00000114737	11.3951	-1.68031	0.642341	-2.61592	0.00889876	0.0387307	NA
ENSMUSG00000031987	2205.94	-1.67387	0.0777174	-21.5379	6.87911e-103	3.26447e-100	Egln1
ENSMUSG00000090958	55.0353	-1.67118	0.323719	-5.16243	2.43763e-07	3.83839e-06	Lrrc32
ENSMUSG00000049285	11.3383	-1.67117	0.669583	-2.49584	0.0125658	0.0512206	Mblac1
ENSMUSG00000083761	13.5585	-1.66698	0.632835	-2.63414	0.00843509	0.0370635	NA
ENSMUSG00000067818	7.80842	-1.66302	0.78961	-2.10613	0.0351929	0.112562	Myl9
ENSMUSG00000003955	2134.51	-1.66182	0.0788042	-21.088	1.02585e-98	4.43863e-96	Fam162a
ENSMUSG00000082016	55.8121	-1.66113	0.322807	-5.1459	2.66239e-07	4.12962e-06	NA
ENSMUSG00000117359	38.7924	-1.65691	0.361167	-4.58765	4.48267e-06	5.34944e-05	NA
ENSMUSG00000005089	45.0429	-1.64891	0.345352	-4.77459	1.80074e-06	2.38441e-05	Slc1a2
ENSMUSG00000015437	843.456	-1.64836	0.389322	-4.23392	2.29651e-05	0.000233476	Gzmb
ENSMUSG00000096617	44.2281	-1.6458	0.390669	-4.21276	2.52269e-05	0.000252032	NA
ENSMUSG00000120697	39.1998	-1.64568	0.366127	-4.49484	6.96225e-06	7.99545e-05	NA
ENSMUSG00000035637	413.312	-1.63852	0.138305	-11.8472	2.22563e-32	2.79839e-30	Grhpr
ENSMUSG00000038936	21.6475	-1.63403	0.494648	-3.30342	0.000955123	0.00611703	Sccpdh
ENSMUSG00000047963	35.5153	-1.63001	0.420798	-3.87361	0.000107233	0.00091751	Stbd1
ENSMUSG00000057037	9.01628	-1.6208	0.743383	-2.1803	0.0292356	0.0980847	Cfhr1
ENSMUSG00000026072	15.2419	-1.61797	0.6194	-2.61216	0.00899717	0.0391012	Il1r1
ENSMUSG00000033847	8.99837	-1.61698	0.716971	-2.2553	0.0241147	0.0848686	Pla2g4c
ENSMUSG00000022912	600.375	-1.61696	0.294987	-5.48147	4.21797e-08	7.54873e-07	Pros1
ENSMUSG00000024201	457.348	-1.61602	0.121231	-13.3301	1.54729e-40	2.55754e-38	Kdm4b
ENSMUSG00000092274	82.6793	-1.6151	0.273991	-5.89471	3.75336e-09	8.10802e-08	Neat1
ENSMUSG00000045031	111.306	-1.61464	0.212023	-7.61538	2.62908e-14	1.06546e-12	Cetn4
ENSMUSG00000025545	81.734	-1.61398	0.267389	-6.03607	1.57913e-09	3.64686e-08	Clybl
ENSMUSG00000036019	42.6609	-1.6108	0.344311	-4.67833	2.8922e-06	3.60875e-05	Tmtc2
ENSMUSG00000078922	576.888	-1.60256	0.122337	-13.0995	3.31219e-39	5.12901e-37	Tgtp1
ENSMUSG00000080982	22.6691	-1.60162	0.483021	-3.31584	0.000913682	0.00591081	NA
ENSMUSG00000027360	85.6622	-1.60077	0.246453	-6.49523	8.29046e-11	2.23372e-09	Hdc
ENSMUSG00000085148	10.8803	-1.59986	0.67979	-2.35346	0.0185996	0.0695524	Mir22hg
ENSMUSG00000057666	46286.6	-1.58973	0.0719202	-22.1041	2.88911e-108	1.46558e-105	Gapdh
ENSMUSG00000079227	66.7858	-1.5872	0.696974	-2.27727	0.0227698	0.0810274	Ccr5
ENSMUSG00000056749	204.993	-1.58347	0.175364	-9.02959	1.72317e-19	1.06511e-17	Nfil3
ENSMUSG00000071068	592.182	-1.57962	0.116596	-13.5478	8.16543e-42	1.43002e-39	Treml2
ENSMUSG00000037071	462.021	-1.57102	0.640344	-2.45339	0.0141515	0.0563876	Scd1
ENSMUSG00000004558	361.519	-1.57094	0.152081	-10.3296	5.17745e-25	4.50683e-23	Ndrg2
ENSMUSG00000024402	2272.97	-1.56344	0.259681	-6.02061	1.73756e-09	3.96915e-08	Lta
ENSMUSG00000001348	301.155	-1.56343	0.141728	-11.0312	2.70137e-28	2.72191e-26	Acp5
ENSMUSG00000110317	8.04995	-1.56297	0.769049	-2.03234	0.0421188	0.129274	NA
ENSMUSG00000103039	9.41923	-1.55848	0.726759	-2.14443	0.0319986	0.10484	NA
ENSMUSG00000103175	30.904	-1.55697	0.415198	-3.74994	0.000176876	0.00143205	NA
ENSMUSG00000030032	20.7274	-1.55581	0.471436	-3.30014	0.000966356	0.00618089	Wdr54
ENSMUSG00000014776	22.0303	-1.55027	0.495895	-3.1262	0.00177081	0.0102319	Nol3
ENSMUSG00000021796	225.685	-1.54803	0.165804	-9.33651	9.95633e-21	6.97699e-19	Bmpr1a
ENSMUSG00000022574	8.71304	-1.54788	0.727128	-2.12877	0.0332736	0.107888	Naprt
ENSMUSG00000034201	101.227	-1.54585	0.248171	-6.22898	4.69473e-10	1.15492e-08	Gas2l1
ENSMUSG00000086049	8.65575	-1.54469	0.728117	-2.12149	0.0338806	0.109374	NA
ENSMUSG00000033105	1270.27	-1.54325	0.100933	-15.2898	8.93709e-53	2.1553e-50	Lss
ENSMUSG00000032845	51.9544	-1.54209	0.324682	-4.74955	2.03865e-06	2.66583e-05	Alpk2
ENSMUSG00000026358	1084.49	-1.54146	0.12946	-11.9068	1.09036e-32	1.4195e-30	Rgs1
ENSMUSG00000036570	9.94262	-1.54069	0.692606	-2.22449	0.0261156	0.0902694	Fxyd1
ENSMUSG00000043773	8.56027	-1.53807	0.767661	-2.00358	0.0451155	0.136562	1700048O20Rik
ENSMUSG00000115505	44.5284	-1.53588	0.33232	-4.62167	3.80658e-06	4.60894e-05	NA
ENSMUSG00000104101	14.597	-1.53013	0.566069	-2.70309	0.0068699	0.0312792	NA
ENSMUSG00000084215	30.3908	-1.52769	0.396328	-3.8546	0.000115918	0.000981167	NA
ENSMUSG00000030208	82.6776	-1.52541	0.274813	-5.55072	2.84489e-08	5.28424e-07	Emp1
ENSMUSG00000024486	109.87	-1.52295	0.275753	-5.52289	3.33477e-08	6.09413e-07	Hbegf
ENSMUSG00000014837	32.8368	-1.52295	0.380958	-3.99768	6.39669e-05	0.000581234	Matcap1
ENSMUSG00000040328	31.56	-1.52273	0.40436	-3.76578	0.000166029	0.00135767	Or2v1
ENSMUSG00000032374	221.965	-1.52193	0.172915	-8.80159	1.34892e-18	7.72138e-17	Plod2
ENSMUSG00000007033	11.726	-1.51625	0.642501	-2.35992	0.0182789	0.0687024	Hspa1l
ENSMUSG00000104360	8.47108	-1.5116	0.736069	-2.05362	0.040013	0.124236	NA
ENSMUSG00000098482	15.6629	-1.51085	0.609464	-2.47899	0.0131755	0.0533073	Mir6363
ENSMUSG00000022178	151.811	-1.50587	0.731677	-2.0581	0.0395803	0.123251	Ajuba
ENSMUSG00000097503	12.2963	-1.49926	0.625507	-2.39687	0.0165358	0.0636301	3110045C21Rik
ENSMUSG00000028549	480.299	-1.4975	0.116095	-12.8989	4.56611e-38	6.92495e-36	Itgb3bp
ENSMUSG00000006651	24.0296	-1.49586	0.436994	-3.42306	0.000619212	0.00424475	Aplp1
ENSMUSG00000019734	27.8568	-1.49541	0.415146	-3.60212	0.000315628	0.00237747	Tmc4
ENSMUSG00000104350	25.2175	-1.49386	0.450199	-3.31822	0.000905919	0.00586593	NA
ENSMUSG00000050953	55.8034	-1.49214	0.296692	-5.02926	4.92374e-07	7.23608e-06	Gja1
ENSMUSG00000094808	43.4537	-1.48632	0.376089	-3.95205	7.74853e-05	0.000688753	1810009J06Rik
ENSMUSG00000030598	95.1567	-1.48559	0.228659	-6.49695	8.19638e-11	2.21242e-09	Fbxo17
ENSMUSG00000082292	621.99	-1.48502	0.130519	-11.3778	5.39415e-30	5.87803e-28	NA
ENSMUSG00000026773	1273.15	-1.48239	0.0877872	-16.8861	5.69037e-64	1.87705e-61	Pfkfb3
ENSMUSG00000097989	10.9616	-1.48147	0.640005	-2.31479	0.0206247	0.0752137	Gm4335
ENSMUSG00000032446	46.2658	-1.47557	0.345988	-4.26481	2.00074e-05	0.000206401	Eomes
ENSMUSG00000033565	39.0398	-1.47156	0.35575	-4.13649	3.52652e-05	0.000342886	Rbfox2
ENSMUSG00000046410	24.8315	-1.47081	0.464988	-3.16311	0.00156096	0.0092074	Kcnk6
ENSMUSG00000020702	41.3685	-1.46966	0.426582	-3.4452	0.000570633	0.00394112	Ccl1
ENSMUSG00000020766	1908.98	-1.46535	0.10164	-14.417	4.04335e-47	8.03807e-45	Galk1
ENSMUSG00000040734	118.756	-1.46495	0.210142	-6.97122	3.14199e-12	1.00701e-10	Ppp1r13l
ENSMUSG00000025969	40.4391	-1.46004	0.369265	-3.95391	7.6883e-05	0.000684226	Nrp2
ENSMUSG00000050538	17.7899	-1.45914	0.520208	-2.80491	0.00503303	0.0244198	NA
ENSMUSG00000037010	20.3189	-1.45452	0.494405	-2.94195	0.00326152	0.0171726	Apln
ENSMUSG00000032310	41.168	-1.45412	0.395326	-3.67828	0.00023481	0.00184033	Cyp1a2
ENSMUSG00000034799	262.715	-1.45361	0.147296	-9.86861	5.69476e-23	4.47998e-21	Unc13a
ENSMUSG00000041220	370.967	-1.45209	0.12894	-11.2617	2.02746e-29	2.1613e-27	Elovl6
ENSMUSG00000021196	7849.17	-1.44946	0.236571	-6.12696	8.95712e-10	2.11506e-08	Pfkp
ENSMUSG00000027199	18.9311	-1.44292	0.513111	-2.8121	0.00492198	0.0240796	Gatm
ENSMUSG00000023243	305.516	-1.43515	0.148476	-9.66592	4.20841e-22	3.15867e-20	Kcnk5
ENSMUSG00000053113	164.658	-1.43225	0.186119	-7.69536	1.411e-14	5.91374e-13	Socs3
ENSMUSG00000037405	520.218	-1.42998	0.133951	-10.6754	1.32631e-26	1.23539e-24	Icam1
ENSMUSG00000029275	519.223	-1.42732	0.127413	-11.2023	3.97146e-29	4.17315e-27	Gfi1
ENSMUSG00000078921	600.851	-1.42201	0.127898	-11.1183	1.02166e-28	1.05102e-26	Tgtp2
ENSMUSG00000022146	22.4689	-1.42116	0.482272	-2.94681	0.00321073	0.0169842	Osmr
ENSMUSG00000103313	9.91036	-1.42103	0.724873	-1.96039	0.0499503	0.147613	NA
ENSMUSG00000098123	38.179	-1.42	0.390047	-3.6406	0.000272007	0.00208846	NA
ENSMUSG00000020027	1330.95	-1.41788	0.107358	-13.2071	7.98669e-40	1.24992e-37	Socs2
ENSMUSG00000033578	34.3218	-1.4174	0.390485	-3.62985	0.000283591	0.00216498	Tmem35a
ENSMUSG00000015647	22.3662	-1.41472	0.457361	-3.09322	0.00197998	0.0112288	Lama5
ENSMUSG00000046157	877.836	-1.41323	0.0945731	-14.9433	1.72356e-50	3.78437e-48	Tmem229b
ENSMUSG00000032064	15.5577	-1.41273	0.545418	-2.59017	0.00959272	0.0411784	Dixdc1
ENSMUSG00000066632	61.069	-1.41118	0.302327	-4.66772	3.04562e-06	3.78094e-05	NA
ENSMUSG00000090030	62.1433	-1.4091	0.274869	-5.12644	2.95267e-07	4.52938e-06	NA
ENSMUSG00000093483	14.8948	-1.4084	0.548319	-2.56857	0.0102119	0.0433232	AA465934
ENSMUSG00000047344	196.735	-1.4077	0.199157	-7.06831	1.56826e-12	5.18443e-11	Lancl3
ENSMUSG00000046223	17.4024	-1.40764	0.509811	-2.7611	0.00576063	0.0271183	Plaur
ENSMUSG00000038179	465.753	-1.40405	0.130232	-10.7812	4.22308e-27	4.03414e-25	Slamf7
ENSMUSG00000057329	1684.73	-1.40103	0.113793	-12.3121	7.7984e-35	1.07217e-32	Bcl2
ENSMUSG00000019889	33.3095	-1.39981	0.373697	-3.74583	0.000179799	0.00145251	Ptprk
ENSMUSG00000007817	1763.37	-1.39762	0.0883677	-15.816	2.41335e-56	6.12118e-54	Zmiz1
ENSMUSG00000053470	828.358	-1.39046	0.0978055	-14.2166	7.22736e-46	1.3808e-43	Kdm3a
ENSMUSG00000020572	3183.54	-1.38844	0.0687674	-20.1904	1.18925e-90	4.7284e-88	Nampt
ENSMUSG00000022707	217.322	-1.38541	0.161523	-8.57715	9.72556e-18	5.29899e-16	Gbe1
ENSMUSG00000037012	4955.27	-1.38345	0.0654604	-21.1342	3.85769e-99	1.71971e-96	Hk1
ENSMUSG00000046532	139.037	-1.38083	0.202013	-6.83537	8.17956e-12	2.46577e-10	Ar
ENSMUSG00000024014	2085.21	-1.37614	0.093793	-14.6722	9.72068e-49	2.0141e-46	Pim1
ENSMUSG00000078650	15.9453	-1.37595	0.597528	-2.30273	0.021294	0.0770618	G6pc
ENSMUSG00000097125	692.597	-1.37484	0.120493	-11.4101	3.72139e-30	4.1162e-28	NA
ENSMUSG00000056962	1066.31	-1.3747	0.0892189	-15.4081	1.44323e-53	3.53856e-51	Jmjd6
ENSMUSG00000022865	16.4225	-1.3719	0.544057	-2.52161	0.011682	0.0483416	Cxadr
ENSMUSG00000044197	161.65	-1.37181	0.178813	-7.67177	1.69639e-14	7.02976e-13	Gpr146
ENSMUSG00000025986	876.21	-1.36425	0.090827	-15.0203	5.40293e-51	1.26163e-48	Slc39a10
ENSMUSG00000055320	129.882	-1.36242	0.217228	-6.27182	3.56856e-10	8.92807e-09	Tead1
ENSMUSG00000110569	18.3063	-1.36214	0.515398	-2.6429	0.00822001	0.0363137	NA
ENSMUSG00000020131	42.3809	-1.36098	0.332069	-4.09849	4.15852e-05	0.000398762	Pcsk4
ENSMUSG00000120539	10.9994	-1.35989	0.660299	-2.05951	0.0394456	0.122968	NA
ENSMUSG00000001444	1543.67	-1.35767	0.368052	-3.68879	0.000225324	0.00177164	Tbx21
ENSMUSG00000053931	1840.14	-1.35751	0.0748316	-18.1408	1.51729e-73	5.44411e-71	Cnn3
ENSMUSG00000089781	13.3262	-1.35575	0.647774	-2.09294	0.0363543	0.115559	Gm15756
ENSMUSG00000110790	107.497	-1.35139	0.217454	-6.21461	5.14532e-10	1.25527e-08	NA
ENSMUSG00000073555	93.3025	-1.35105	0.270703	-4.99088	6.01036e-07	8.65151e-06	Gm4951
ENSMUSG00000102602	19.8791	-1.35043	0.483723	-2.79173	0.00524269	0.0252208	NA
ENSMUSG00000042622	166.25	-1.35038	0.194191	-6.95388	3.55374e-12	1.12914e-10	Maff
ENSMUSG00000061099	13.3126	-1.3503	0.582092	-2.31975	0.0203547	0.0745392	Gapdhs
ENSMUSG00000026872	80.7023	-1.35015	0.2571	-5.25145	1.5091e-07	2.46945e-06	Zeb2
ENSMUSG00000020812	42.658	-1.34503	0.335639	-4.00738	6.13967e-05	0.000562395	Snhg16
ENSMUSG00000030352	31.0536	-1.34095	0.423388	-3.1672	0.00153915	0.00911164	Tspan9
ENSMUSG00000069094	1821.8	-1.34089	0.0816179	-16.4289	1.18848e-60	3.49676e-58	Pde7a
ENSMUSG00000034379	385.005	-1.33979	0.168193	-7.96576	1.64209e-15	7.36485e-14	Wdr5b
ENSMUSG00000045039	34.6793	-1.33595	0.387274	-3.44963	0.000561352	0.00388432	Megf8
ENSMUSG00000028655	150.942	-1.33544	0.193602	-6.89782	5.2805e-12	1.61836e-10	Mfsd2a
ENSMUSG00000106574	12.5942	-1.32807	0.625716	-2.12247	0.033798	0.109189	Gm2451
ENSMUSG00000052504	25.6859	-1.32742	0.45891	-2.89256	0.00382115	0.0196069	Epha3
ENSMUSG00000025025	268.695	-1.32738	0.147402	-9.00519	2.15286e-19	1.31961e-17	Mxi1
ENSMUSG00000003123	168.772	-1.3253	0.194412	-6.81695	9.29925e-12	2.78051e-10	Lipe
ENSMUSG00000105813	537.351	-1.3175	0.106194	-12.4066	2.40732e-35	3.37276e-33	NA
ENSMUSG00000025790	632.63	-1.31623	0.132499	-9.93393	2.96355e-23	2.35658e-21	Slco3a1
ENSMUSG00000103435	18.3885	-1.316	0.513816	-2.56122	0.0104304	0.0440799	NA
ENSMUSG00000034522	466.861	-1.31337	0.143128	-9.17622	4.46502e-20	2.95878e-18	Zfp395
ENSMUSG00000052146	34.8226	-1.31244	0.369291	-3.55395	0.000379492	0.00278162	Rps10
ENSMUSG00000032688	2953.36	-1.30976	0.088846	-14.7419	3.46774e-49	7.2877e-47	Malt1
ENSMUSG00000033434	261.89	-1.30331	0.150569	-8.65593	4.88916e-18	2.68375e-16	Gtpbp6
ENSMUSG00000071266	17.7268	-1.30098	0.513581	-2.53316	0.011304	0.0470553	Zfp946
ENSMUSG00000054006	253.92	-1.29994	0.163161	-7.96722	1.62278e-15	7.30054e-14	NA
ENSMUSG00000028278	306.252	-1.29823	0.142827	-9.08958	9.94192e-20	6.35894e-18	Rragd
ENSMUSG00000004319	1326.37	-1.29361	0.097658	-13.2463	4.73931e-40	7.57825e-38	Clcn3
ENSMUSG00000067377	71.6925	-1.29161	0.262984	-4.91139	9.04353e-07	1.2538e-05	Tspan6
ENSMUSG00000053714	93.6166	-1.29081	0.228591	-5.6468	1.63463e-08	3.1434e-07	4732471J01Rik
ENSMUSG00000093661	170.107	-1.28759	0.176182	-7.3083	2.70547e-13	9.87597e-12	Eif4e3
ENSMUSG00000083672	21.6255	-1.28684	0.472129	-2.7256	0.00641842	0.0296363	Kpna2-ps
ENSMUSG00000033863	258.806	-1.2866	0.165403	-7.77862	7.33213e-15	3.11743e-13	Klf9
ENSMUSG00000002769	67.7925	-1.28404	0.311928	-4.11648	3.847e-05	0.000371347	Gnmt
ENSMUSG00000022906	754.318	-1.28025	0.110329	-11.6039	3.93769e-31	4.56121e-29	Parp9
ENSMUSG00000103219	84.5835	-1.27964	0.240866	-5.31268	1.08022e-07	1.80581e-06	NA
ENSMUSG00000031983	120.613	-1.2794	0.203399	-6.29013	3.17204e-10	7.96312e-09	2310022B05Rik
ENSMUSG00000005268	15.2235	-1.27736	0.619593	-2.0616	0.0392454	0.122447	Prlr
ENSMUSG00000043192	129.2	-1.27698	0.230468	-5.54082	3.0106e-08	5.56394e-07	Gpi-ps
ENSMUSG00000048852	72.2965	-1.26731	0.26559	-4.77166	1.82715e-06	2.41285e-05	Gm12185
ENSMUSG00000003865	281.278	-1.26463	0.173258	-7.2991	2.897e-13	1.0549e-11	Gys1
ENSMUSG00000022347	17.3743	-1.26362	0.570007	-2.21685	0.0266335	0.0915435	A1bg
ENSMUSG00000047139	204.841	-1.26315	0.18761	-6.73287	1.66349e-11	4.82674e-10	Cd24a
ENSMUSG00000052852	32.2714	-1.26284	0.386287	-3.26918	0.00107861	0.00676652	Reep1
ENSMUSG00000028885	16.8125	-1.26265	0.52266	-2.41582	0.0157	0.0609723	Smpdl3b
ENSMUSG00000028456	37.5706	-1.26209	0.349194	-3.6143	0.000301162	0.00227784	Unc13b
ENSMUSG00000015083	30.105	-1.26112	0.396865	-3.1777	0.00148447	0.0088449	C8g
ENSMUSG00000024873	24.8084	-1.25992	0.452106	-2.78678	0.00532354	0.0255429	Cnih2
ENSMUSG00000002043	235.633	-1.25825	0.164356	-7.65565	1.92337e-14	7.85962e-13	Trappc6a
ENSMUSG00000081221	29.9871	-1.2579	0.409261	-3.07359	0.00211499	0.011889	Gm14760
ENSMUSG00000030718	1145.15	-1.25705	0.0847758	-14.8279	9.66494e-50	2.06059e-47	Ppme1
ENSMUSG00000053522	102.485	-1.25619	0.215004	-5.84265	5.13768e-09	1.08281e-07	Lgals7
ENSMUSG00000038205	26.0105	-1.25568	0.428912	-2.92759	0.00341606	0.0178838	Prkab2
ENSMUSG00000042215	116.813	-1.25518	0.20383	-6.158	7.36706e-10	1.7567e-08	Bag2
ENSMUSG00000005547	51.5581	-1.25423	0.355937	-3.52375	0.000425493	0.0030774	Cyp2a5
ENSMUSG00000026200	45.4337	-1.25401	0.334048	-3.75397	0.000174053	0.00141542	Glb1l
ENSMUSG00000026077	80.6153	-1.25362	0.261801	-4.78843	1.68091e-06	2.24595e-05	Npas2
ENSMUSG00000051444	92.6331	-1.25343	0.226897	-5.52421	3.30968e-08	6.06336e-07	Bbs12
ENSMUSG00000036995	37.3773	-1.25235	0.375129	-3.33846	0.000842453	0.00551059	Asap3
ENSMUSG00000034855	18.4403	-1.2497	0.568328	-2.19891	0.027884	0.0945819	Cxcl10
ENSMUSG00000121096	17.1822	-1.24886	0.520673	-2.39854	0.0164604	0.0634065	NA
ENSMUSG00000004936	1113.39	-1.24796	0.087944	-14.1904	1.05104e-45	1.98228e-43	Map2k1
ENSMUSG00000090942	25.7215	-1.2447	0.437539	-2.84477	0.00444435	0.0222082	F830016B08Rik
ENSMUSG00000022246	21.5895	-1.23124	0.457447	-2.69153	0.00711242	0.0322094	Rai14
ENSMUSG00000045441	243.984	-1.22964	0.189132	-6.50149	7.95303e-11	2.15464e-09	Gprin3
ENSMUSG00000020723	22.3077	-1.22876	0.469707	-2.61602	0.00889613	0.0387307	Cacng4
ENSMUSG00000005696	365.524	-1.22794	0.139353	-8.81173	1.23226e-18	7.08115e-17	Sh2d1a
ENSMUSG00000028793	1423.95	-1.22749	0.0847409	-14.4852	1.5038e-47	3.07255e-45	Rnf19b
ENSMUSG00000099835	15.8826	-1.22554	0.526331	-2.32845	0.019888	0.0732896	NA
ENSMUSG00000026839	25.6178	-1.2253	0.516543	-2.37211	0.017687	0.0670428	Upp2
ENSMUSG00000117216	34.6116	-1.22439	0.358539	-3.41493	0.000637979	0.00434103	NA
ENSMUSG00000033307	8418.97	-1.22344	0.0756611	-16.17	8.21517e-59	2.19733e-56	Mif
ENSMUSG00000022667	19.721	-1.21975	0.524255	-2.32663	0.0199848	0.0735544	Cd200r1
ENSMUSG00000030584	14.6868	-1.21418	0.560778	-2.16516	0.0303751	0.100687	Dpf1
ENSMUSG00000004451	202.986	-1.21113	0.179329	-6.75367	1.44147e-11	4.24109e-10	Ralb
ENSMUSG00000020108	1690.01	-1.21102	0.106187	-11.4047	3.96265e-30	4.35034e-28	Ddit4
ENSMUSG00000046546	18.5626	-1.21043	0.496216	-2.43932	0.0147151	0.0581919	Fam43a
ENSMUSG00000081600	26.3863	-1.20923	0.510915	-2.36679	0.0179432	0.0678391	Gm12286
ENSMUSG00000083773	32.665	-1.20912	0.368242	-3.28348	0.00102533	0.00647645	Gm13394
ENSMUSG00000097061	28.2417	-1.20789	0.405692	-2.97736	0.00290746	0.0155873	9330151L19Rik
ENSMUSG00000059326	43.8837	-1.20751	0.341288	-3.5381	0.000403016	0.00293649	Csf2ra
ENSMUSG00000034640	193.112	-1.20586	0.17293	-6.97311	3.10015e-12	9.97949e-11	Tiparp
ENSMUSG00000053110	25.2473	-1.2054	0.418849	-2.87788	0.00400356	0.0203864	Yap1
ENSMUSG00000024462	48.4388	-1.20254	0.347298	-3.46255	0.00053508	0.00373946	Gabbr1
ENSMUSG00000071176	89.7417	-1.20118	0.234137	-5.13026	2.89348e-07	4.45717e-06	Arhgef10
ENSMUSG00000087108	148.129	-1.19783	0.203569	-5.88417	4.00058e-09	8.59396e-08	NA
ENSMUSG00000116815	30.268	-1.19706	0.396563	-3.0186	0.00253946	0.0138981	NA
ENSMUSG00000029016	93.0697	-1.19382	0.242767	-4.91754	8.76387e-07	1.21857e-05	Clcn6
ENSMUSG00000026170	19.6166	-1.19309	0.497456	-2.39839	0.0164673	0.0634164	Cyp27a1
ENSMUSG00000110899	81.5921	-1.19193	0.255673	-4.66193	3.13262e-06	3.87913e-05	NA
ENSMUSG00000069939	17.351	-1.18908	0.51865	-2.29263	0.0218691	0.0786104	NA
ENSMUSG00000022768	109.075	-1.18871	0.227342	-5.2287	1.70704e-07	2.76262e-06	Ccdc116
ENSMUSG00000085385	124.557	-1.18841	0.209595	-5.67004	1.42764e-08	2.76343e-07	Snhg17
ENSMUSG00000054072	2962.54	-1.18632	0.198571	-5.9743	2.31081e-09	5.18205e-08	Iigp1
ENSMUSG00000002910	27.8254	-1.18598	0.410122	-2.89177	0.00383073	0.0196492	Arrdc2
ENSMUSG00000090610	29.5181	-1.18528	0.406343	-2.91694	0.0035348	0.0183942	Gm3571
ENSMUSG00000035133	219.208	-1.18408	0.166324	-7.11913	1.08614e-12	3.63968e-11	Arhgap5
ENSMUSG00000110750	17.2043	-1.17966	0.555785	-2.1225	0.0337955	0.109189	NA
ENSMUSG00000074580	21.7184	-1.1781	0.461841	-2.55089	0.0107449	0.0452013	4931440P22Rik
ENSMUSG00000028967	233.939	-1.1775	0.173307	-6.79433	1.08813e-11	3.23384e-10	Errfi1
ENSMUSG00000036676	38.7224	-1.17429	0.377785	-3.10834	0.00188141	0.0107569	Tmtc3
ENSMUSG00000070407	677.585	-1.17334	0.110842	-10.5857	3.47158e-26	3.21198e-24	Hs3st3b1
ENSMUSG00000036402	615.922	-1.17331	0.265527	-4.41882	9.9241e-06	0.000110206	Gng12
ENSMUSG00000019487	209.518	-1.16715	0.168884	-6.91095	4.81404e-12	1.4878e-10	Trip10
ENSMUSG00000035356	409.722	-1.16644	0.134676	-8.66106	4.67391e-18	2.5752e-16	Nfkbiz
ENSMUSG00000101970	101.952	-1.16459	0.228358	-5.09985	3.39931e-07	5.14478e-06	Chaserr
ENSMUSG00000022686	151.021	-1.16072	0.185376	-6.26146	3.8138e-10	9.49321e-09	B3gnt5
ENSMUSG00000048721	150.409	-1.15885	0.211132	-5.48874	4.04803e-08	7.27113e-07	Fndc9
ENSMUSG00000039410	82.1789	-1.15607	0.577728	-2.00106	0.0453856	0.137182	Prdm16
ENSMUSG00000023175	4531.63	-1.15499	0.0689411	-16.7533	5.36093e-63	1.71445e-60	Bsg
ENSMUSG00000052125	70.4134	-1.14409	0.276232	-4.14176	3.44656e-05	0.000336669	F730043M19Rik
ENSMUSG00000046879	1857.33	-1.14321	0.207434	-5.51121	3.56373e-08	6.46437e-07	Irgm1
ENSMUSG00000022656	14.7037	-1.14111	0.579198	-1.97016	0.0488205	0.14518	Nectin3
ENSMUSG00000049232	695.991	-1.14041	0.245785	-4.63986	3.48639e-06	4.27047e-05	Tigd2
ENSMUSG00000121395	20.0621	-1.13787	0.492014	-2.31267	0.0207407	0.0755205	NA
ENSMUSG00000028716	71.8829	-1.13361	0.330478	-3.43022	0.000603095	0.00414392	Pdzk1ip1
ENSMUSG00000069008	28.1559	-1.13319	0.459299	-2.46722	0.0136167	0.054655	NA
ENSMUSG00000037003	16.8479	-1.1329	0.538415	-2.10414	0.0353662	0.112955	Tns2
ENSMUSG00000120198	55.2698	-1.13228	0.308383	-3.67168	0.000240965	0.00187955	NA
ENSMUSG00000045414	568.937	-1.12976	0.117564	-9.60971	7.27534e-22	5.37827e-20	Dipk2a
ENSMUSG00000031955	23.3217	-1.12896	0.474186	-2.38084	0.017273	0.0658129	Bcar1
ENSMUSG00000087366	58.9663	-1.12832	0.286067	-3.94427	8.00434e-05	0.000707644	Junos
ENSMUSG00000075289	14.0348	-1.1277	0.569005	-1.98188	0.0474926	0.14195	Carns1
ENSMUSG00000102976	54.1123	-1.12669	0.297188	-3.79118	0.000149936	0.001235	Zc3h11a
ENSMUSG00000024378	2412.88	-1.12614	0.0758673	-14.8436	7.65487e-50	1.65604e-47	Stard4
ENSMUSG00000010067	248.084	-1.12587	0.154981	-7.26453	3.74324e-13	1.34479e-11	Rassf1
ENSMUSG00000046805	36.6857	-1.12398	0.445952	-2.5204	0.011722	0.0484797	Mpeg1
ENSMUSG00000042351	1047.78	-1.12341	0.0977949	-11.4874	1.52681e-30	1.72776e-28	Grap2
ENSMUSG00000039959	36.6411	-1.1195	0.354603	-3.15705	0.00159372	0.00936682	Hip1
ENSMUSG00000023832	646.192	-1.11931	0.121555	-9.20828	3.31403e-20	2.22615e-18	Acat2
ENSMUSG00000106990	116.324	-1.11807	0.215844	-5.18	2.21891e-07	3.52129e-06	NA
ENSMUSG00000035863	21.4421	-1.11748	0.47196	-2.36773	0.0178974	0.0676835	Palm
ENSMUSG00000024533	101.079	-1.1119	0.223162	-4.98249	6.27711e-07	8.99149e-06	Spire1
ENSMUSG00000079694	26.2125	-1.11145	0.435022	-2.55493	0.0106208	0.0447558	Gm14862
ENSMUSG00000042207	986.303	-1.11026	0.0885352	-12.5403	4.49436e-36	6.54619e-34	Kdm5b
ENSMUSG00000018500	45.0864	-1.10904	0.316306	-3.50624	0.000454491	0.00325988	Adora2b
ENSMUSG00000029385	378.449	-1.10852	0.151127	-7.335	2.21722e-13	8.17483e-12	Ccng2
ENSMUSG00000098871	1258.47	-1.10818	0.114619	-9.66836	4.10901e-22	3.09988e-20	Mir6381
ENSMUSG00000027002	238.431	-1.10426	0.160281	-6.88954	5.59749e-12	1.7084e-10	Nckap1
ENSMUSG00000023755	35.7914	-1.10254	0.372992	-2.95592	0.00311735	0.0165617	Rhebl1
ENSMUSG00000114235	56.0642	-1.09953	0.285977	-3.8448	0.00012065	0.00101713	NA
ENSMUSG00000021067	597.425	-1.0982	0.1099	-9.99275	1.63968e-23	1.31094e-21	Sav1
ENSMUSG00000042035	65.4669	-1.09357	0.264336	-4.13704	3.51818e-05	0.000342301	Igsf3
ENSMUSG00000035171	255.701	-1.09275	0.151726	-7.20213	5.928e-13	2.04711e-11	1110059E24Rik
ENSMUSG00000035171	255.701	-1.09275	0.151726	-7.20213	5.928e-13	2.04711e-11	Gm54192
ENSMUSG00000032579	177.988	-1.09117	0.168357	-6.48127	9.09509e-11	2.43269e-09	Hemk1
ENSMUSG00000034731	255.721	-1.09039	0.169368	-6.43801	1.21051e-10	3.18566e-09	Dgkh
ENSMUSG00000074682	42.9864	-1.08938	0.324478	-3.35734	0.000786972	0.00520789	Zcchc3
ENSMUSG00000053442	192.99	-1.08889	0.200972	-5.41811	6.02328e-08	1.05236e-06	NA
ENSMUSG00000025347	26.5187	-1.08864	0.447513	-2.43265	0.0149888	0.0589414	Mettl7b
ENSMUSG00000037225	502.262	-1.08722	0.118968	-9.13873	6.31889e-20	4.13143e-18	Fgf2
ENSMUSG00000062309	21.7322	-1.08617	0.460974	-2.35624	0.0184609	0.0691918	Rpp25
ENSMUSG00000025656	286.995	-1.08058	0.147364	-7.33276	2.25455e-13	8.27101e-12	Arhgef9
ENSMUSG00000120024	874.8	-1.07654	0.249971	-4.30664	1.65753e-05	0.000174047	NA
ENSMUSG00000041180	119.943	-1.07599	0.20876	-5.15417	2.54758e-07	3.9785e-06	Hectd2
ENSMUSG00000021066	267.774	-1.07258	0.147051	-7.29393	3.01045e-13	1.0935e-11	Atl1
ENSMUSG00000087541	39.9661	-1.07052	0.33657	-3.18067	0.00146933	0.00877244	NA
ENSMUSG00000120356	125.957	-1.06978	0.217173	-4.9259	8.39723e-07	1.16981e-05	NA
ENSMUSG00000052151	55.8225	-1.06578	0.297381	-3.5839	0.000338501	0.00253033	Plpp2
ENSMUSG00000096655	46.2713	-1.06493	0.356108	-2.99047	0.00278547	0.0150374	1700065D16Rik
ENSMUSG00000121075	95.6308	-1.06347	0.220864	-4.81506	1.47152e-06	1.97694e-05	NA
ENSMUSG00000036206	52.3726	-1.06179	0.29754	-3.56855	0.000358959	0.00265359	Sh3bp4
ENSMUSG00000002227	372.668	-1.06106	0.133738	-7.93391	2.12345e-15	9.43747e-14	Mov10
ENSMUSG00000067931	124.556	-1.06038	0.218695	-4.84868	1.24284e-06	1.69447e-05	Zfp948
ENSMUSG00000044330	88.4073	-1.06026	0.318473	-3.3292	0.000870969	0.00566939	NA
ENSMUSG00000068606	81.8252	-1.05872	0.270639	-3.91194	9.15593e-05	0.000796528	Gm4841
ENSMUSG00000039438	19.3241	-1.05313	0.518689	-2.03038	0.0423182	0.129696	Ttc36
ENSMUSG00000031381	258.277	-1.05233	0.142341	-7.39302	1.43527e-13	5.40007e-12	Piga
ENSMUSG00000103072	28.7511	-1.04484	0.400103	-2.61142	0.00901667	0.0391396	NA
ENSMUSG00000057335	524.721	-1.04464	0.111562	-9.36371	7.69833e-21	5.44471e-19	Cep170
ENSMUSG00000041168	2419.62	-1.04423	0.0745464	-14.0077	1.39771e-44	2.57021e-42	Lonp1
ENSMUSG00000000982	1360.11	-1.04354	0.309649	-3.37007	0.000751498	0.00500783	Ccl3
ENSMUSG00000042870	53.4864	-1.04089	0.319764	-3.25518	0.00113322	0.00705192	Tom1
ENSMUSG00000116262	118.238	-1.03996	0.206367	-5.03935	4.67117e-07	6.88057e-06	NA
ENSMUSG00000046808	95.6757	-1.03986	0.236398	-4.39878	1.0886e-05	0.000119779	Atp10d
ENSMUSG00000028270	11201.6	-1.03887	0.0907755	-11.4444	2.50864e-30	2.79581e-28	Gbp2
ENSMUSG00000116858	23.3564	-1.03618	0.438483	-2.36311	0.0181221	0.0682525	NA
ENSMUSG00000042650	3592.4	-1.03556	0.063879	-16.2113	4.19608e-59	1.14312e-56	Alkbh5
ENSMUSG00000043445	1228.88	-1.03524	0.0950278	-10.894	1.23079e-27	1.20708e-25	Pgp
ENSMUSG00000073598	40.1346	-1.03267	0.356966	-2.8929	0.00381699	0.0195924	Smim33
ENSMUSG00000027075	25.9202	-1.03239	0.409995	-2.51806	0.0118004	0.0487219	Slc43a1
ENSMUSG00000035373	22.799	-1.03066	0.438417	-2.35088	0.0187292	0.0699605	Ccl7
ENSMUSG00000059743	1991.91	-1.02672	0.111668	-9.19434	3.77293e-20	2.52289e-18	Fdps
ENSMUSG00000029304	256.167	-1.02663	0.422694	-2.42878	0.0151496	0.0593992	Spp1
ENSMUSG00000050394	66.6318	-1.02627	0.300086	-3.41991	0.000626416	0.00428216	Armcx6
ENSMUSG00000020475	26.2397	-1.02315	0.42615	-2.4009	0.0163546	0.0631145	Pgam2
ENSMUSG00000004885	319.96	-1.02203	0.156146	-6.54531	5.93738e-11	1.62653e-09	Crabp2
ENSMUSG00000027997	219.688	-1.02084	0.182738	-5.58637	2.3187e-08	4.38436e-07	Casp6
ENSMUSG00000067071	161.071	-1.01412	0.17797	-5.69827	1.21026e-08	2.36442e-07	Hes6
ENSMUSG00000055413	40.4433	-1.0141	0.352856	-2.87398	0.0040533	0.020604	H2-Q5
ENSMUSG00000019189	1366.41	-1.01399	0.0828114	-12.2446	1.79625e-34	2.44673e-32	Rnf145
ENSMUSG00000085563	19.4641	-1.00874	0.484074	-2.08386	0.0371733	0.117477	NA
ENSMUSG00000105504	1989.19	-1.00681	0.096335	-10.4511	1.44772e-25	1.29075e-23	Gbp5
ENSMUSG00000053835	174.366	-1.00649	0.173745	-5.79293	6.91708e-09	1.42917e-07	H2-T24
ENSMUSG00000052684	257.591	-1.00176	0.14671	-6.82813	8.60269e-12	2.57748e-10	Jun
ENSMUSG00000021091	35.6574	-1.00116	0.411703	-2.43175	0.015026	0.0590248	Serpina3n
ENSMUSG00000000532	215.391	-1.00095	0.162125	-6.17393	6.66127e-10	1.60383e-08	Acvr1b
ENSMUSG00000087579	43.8021	-1.00052	0.343309	-2.91434	0.0035644	0.0185155	Hectd2os

## Sheet: DN gene list excluded NA (583)
Mgarp
Ubd
Kremen2
En2
Fam184b
H2-Ab1
Ppef1
Muc2
Ch25h
Smtnl2
Tgm2
Lrp2bp
Bnip3
Egln3
Prr15
Slc19a3
Mt3
Itga7
Ak4
Slc2a3
Galr3
Phex
Coro6
Scx
Atp7b
Vldlr
Mir7-1
Gm4257
1600014C23Rik
Ciart
Aldoc
Dntt
Cysltr1
Gm29684
Fam183b
Cldnd2
Snora69
Ankrd37
Ocstamp
Slc16a3
Pla2g4b
Endou
Arhgef37
Gm9772
4930509G22Rik
Slc27a6
Lhx6
Gpr33
Cacnb2
Art3
4930459C07Rik
Rgs11
Aldoart2
Ophn1
Gm34084
Pom121l2
Barhl1
Ypel4
Cdhr3
Havcr2
Kbtbd13
Edn1
Ascl2
Mboat2
4930428O21Rik
Epm2a
Mab21l3
Mt1
Klrg2
Serpina3g
Myh11
Pi15
Il3
Tssk1
Nkpd1
Slamf8
Gm5507
Gm6951
Gm22572
Fzd7
Gap43
Hpse
Tnp2
Spsb2
Lpar3
Mt2
P4ha2
Mycl
Rab33a
Hspb7
Tgm1
Ifng
Gstt1
Atf3
D630039A03Rik
Tpi1
Stra6
Cfap91
Ppp1r3b
Sptbn2
Cavin3
Serpina3f
Ovol1
Fam83e
B3gnt3
Ccrl2
Gm10291
Gm13464
Il21
Ndrg1
Bicd1
Mir5125
Slc35d3
Batf3
Hif3a
Ppp1r3c
Gad2
Mpzl2
Cfap54
Jag2
Pfkl
Gm15708
Arhgdig
Themis
Clic5
F2rl2
Gbp11
Slco5a1
Hilpda
Ier3
Csf2
Pnma1
Lair1
Fgf11
Il33
Nrn1
Gm8714
Syce2
Vegfa
Sema7a
Agrp
Prelid2
Abhd18
Stxbp6
Cd36
Gm10640
Tppp
Gm12224
Nxnl1
Cacna1c
Gm2710
Lrrc66
Insl3
Trpc3
Obsl1
Fhdc1
Pgm1
Armcx4
Eno1
Syt12
Gm2308
Epor
Sphk1
Bmp2
Prr36
Stard8
Rsad2
Chtf8
Vmn2r60
Slc2a1
Gm14023
Il10ra
Il12rb2
Gadd45g
Zfp608
Rnf128
Gm10293
Narf
Slc13a3
Slc6a12
Asb2
Pdzd2
Ppp1r1b
Gckr
Anxa2
Stc2
Acvrl1
Slc16a7
Serpine1
Fads2
Pls1
Galnt6
Rhobtb1
Tirap
Dennd3
Gm10327
Tmem45a
Acsl6
Fars2
Prdm1
Gm4221
Mpp2
St6gal1
Pgbd1
Rnf208
Tbkbp1
Adamts4
Frs3
Skida1
Nos3
Gm31166
Aldoa
Tlcd3b
Kcnc3
Capsl
Bnip3l-ps
Pdk1
Garin3
Clvs1
Firre
Pld2
Parp16
Pafah1b3
Pkp2
Cttnbp2nl
Gm2606
Nav1
Myl4
Ly6c1
Ero1a
Kcnj8
Insrr
Stox2
Bend5
Hk2
Rcor2
Gm30108
Kcnk7
Scd2
Lipg
Rab39
Ston2
Lsr
Sap30
P4ha1
Il17d
Fam20a
Rasa4
Atg9b
Calhm6
Galnt9
2500002B13Rik
Pkm
Plcxd1
Ppm1j
Vmn2r84
Sdc4
Gpm6b
Smim3
Ube2l6
Eno1b
Pgk1
Bnip3l
Xdh
Asph
Etv1
Aldoart1
Armcx1
Gm8565
F3
Gls2
Akr1c18
Pcx
Tat
2900076A07Rik
4930483K19Rik
4933407K13Rik
Hap1
Ankzf1
Setbp1
Smox
Higd1a
Actbl2
Gm13872
Pgam1
Sh3gl3
Gm13292
Neb
Arrb1
Gpr160
B430319G15Rik
Thy1
Hamp2
Cyp2s1
Cdh23
Iqsec2
Gpi1
Gm2546
Ldha
Gm12033
Hacd1
Slc37a4
Eps8
Carmil1
Trim46
Olfml2a
Dennd2b
C1qtnf12
Gm13296
Tec
Gm47112
Egln1
Lrrc32
Mblac1
Myl9
Fam162a
Slc1a2
Gzmb
Grhpr
Sccpdh
Stbd1
Cfhr1
Il1r1
Pla2g4c
Pros1
Kdm4b
Neat1
Cetn4
Clybl
Tmtc2
Tgtp1
Hdc
Mir22hg
Gapdh
Ccr5
Nfil3
Treml2
Scd1
Ndrg2
Lta
Acp5
Wdr54
Nol3
Bmpr1a
Naprt
Gas2l1
Lss
Alpk2
Rgs1
Fxyd1
1700048O20Rik
Emp1
Hbegf
Matcap1
Or2v1
Plod2
Hspa1l
Mir6363
Ajuba
3110045C21Rik
Itgb3bp
Aplp1
Tmc4
Gja1
1810009J06Rik
Fbxo17
Pfkfb3
Gm4335
Eomes
Rbfox2
Kcnk6
Ccl1
Galk1
Ppp1r13l
Nrp2
Apln
Cyp1a2
Unc13a
Elovl6
Pfkp
Gatm
Kcnk5
Socs3
Icam1
Gfi1
Tgtp2
Osmr
Socs2
Tmem35a
Lama5
Tmem229b
Dixdc1
AA465934
Lancl3
Plaur
Slamf7
Bcl2
Ptprk
Zmiz1
Kdm3a
Nampt
Gbe1
Hk1
Ar
Pim1
G6pc
Jmjd6
Cxadr
Gpr146
Slc39a10
Tead1
Pcsk4
Tbx21
Cnn3
Gm15756
Gm4951
Maff
Gapdhs
Zeb2
Snhg16
Tspan9
Pde7a
Wdr5b
Megf8
Mfsd2a
Gm2451
Epha3
Mxi1
Lipe
Slco3a1
Zfp395
Rps10
Malt1
Gtpbp6
Zfp946
Rragd
Clcn3
Tspan6
4732471J01Rik
Eif4e3
Kpna2-ps
Klf9
Gnmt
Parp9
2310022B05Rik
Prlr
Gpi-ps
Gm12185
Gys1
A1bg
Cd24a
Reep1
Smpdl3b
Unc13b
C8g
Cnih2
Trappc6a
Gm14760
Ppme1
Lgals7
Prkab2
Bag2
Cyp2a5
Glb1l
Npas2
Bbs12
Asap3
Cxcl10
Map2k1
F830016B08Rik
Rai14
Gprin3
Cacng4
Sh2d1a
Rnf19b
Upp2
Mif
Cd200r1
Dpf1
Ralb
Ddit4
Fam43a
Gm12286
Gm13394
9330151L19Rik
Csf2ra
Tiparp
Yap1
Gabbr1
Arhgef10
Clcn6
Cyp27a1
Ccdc116
Snhg17
Iigp1
Arrdc2
Gm3571
Arhgap5
4931440P22Rik
Errfi1
Tmtc3
Hs3st3b1
Gng12
Trip10
Nfkbiz
Chaserr
B3gnt5
Fndc9
Prdm16
Bsg
F730043M19Rik
Irgm1
Nectin3
Tigd2
Pdzk1ip1
Tns2
Dipk2a
Bcar1
Junos
Carns1
Zc3h11a
Stard4
Rassf1
Mpeg1
Grap2
Hip1
Acat2
Palm
Spire1
Gm14862
Kdm5b
Adora2b
Ccng2
Mir6381
Nckap1
Rhebl1
Sav1
Igsf3
1110059E24Rik
Gm54192
Hemk1
Dgkh
Zcchc3
Mettl7b
Fgf2
Rpp25
Arhgef9
Hectd2
Atl1
Plpp2
1700065D16Rik
Sh3bp4
Mov10
Zfp948
Gm4841
Ttc36
Piga
Cep170
Lonp1
Ccl3
Tom1
Atp10d
Gbp2
Alkbh5
Pgp
Smim33
Slc43a1
Ccl7
Fdps
Spp1
Armcx6
Pgam2
Crabp2
Casp6
Hes6
H2-Q5
Rnf145
Gbp5
H2-T24
Jun
Serpina3n
Acvr1b
Hectd2os

## Sheet: All DN in KO by fold change 
ems	baseMean	log2FoldChange	lfcSE	stat	pvalue	padj	SYMBOL	Note
ENSMUSG00000037161	55.8594	-7.34928	1.05159	-6.98872	2.77402e-12	9.01544e-11	Mgarp
ENSMUSG00000035186	28.4993	-6.37369	1.0805	-5.89886	3.66028e-09	7.91859e-08	Ubd
ENSMUSG00000040680	10.5624	-5.8284	1.31313	-4.43857	9.05597e-06	0.00010193	Kremen2
ENSMUSG00000039095	4.66224	-5.63554	1.46167	-3.85556	0.000115466	NA	En2
ENSMUSG00000015879	4.50965	-5.5871	1.4828	-3.76793	0.000164607	NA	Fam184b
ENSMUSG00000073421	357.441	-5.41887	0.241261	-22.4606	1.00713e-111	5.29141e-109	H2-Ab1
ENSMUSG00000062168	3.88146	-5.36964	1.5075	-3.56195	0.000368106	NA	Ppef1
ENSMUSG00000025515	7.2305	-5.27271	1.37318	-3.83977	0.00012315	0.00103701	Muc2
ENSMUSG00000050370	91.3999	-5.22526	0.435767	-11.991	3.96283e-33	5.20511e-31	Ch25h
ENSMUSG00000045667	43.4027	-5.14932	0.620285	-8.30154	1.0277e-16	5.14234e-15	Smtnl2
ENSMUSG00000037820	531.027	-5.12805	0.202795	-25.2868	4.46048e-141	2.98264e-138	Tgm2	Tissue transglutaminase
ENSMUSG00000031637	152.877	-5.06952	0.324788	-15.6087	6.35485e-55	1.58451e-52	Lrp2bp
ENSMUSG00000078566	1142.51	-4.97496	0.133224	-37.3428	3.31539e-305	8.12879e-302	Bnip3	pro-apoptotic factor
ENSMUSG00000035105	4952.41	-4.86445	0.184536	-26.3604	3.89954e-153	3.37448e-150	Egln3	PHD3
ENSMUSG00000045725	9.48065	-4.74678	1.1916	-3.98355	6.78935e-05	0.000611998	Prr15
ENSMUSG00000038496	18.4398	-4.70508	0.836444	-5.62509	1.85407e-08	3.53765e-07	Slc19a3
ENSMUSG00000031760	2.43077	-4.69395	1.6893	-2.77863	0.00545888	NA	Mt3
ENSMUSG00000025348	27.0431	-4.67107	0.698101	-6.69111	2.21489e-11	6.32684e-10	Itga7
ENSMUSG00000028527	1466.1	-4.63557	0.117216	-39.5474	0	0	Ak4
ENSMUSG00000003153	4996.33	-4.62292	0.0900289	-51.3493	0	0	Slc2a3	Glut3
ENSMUSG00000114755	2.29533	-4.60865	1.73805	-2.65162	0.00801075	NA	Galr3
[truncated: 562 more rows]

## Sheet: Enriched down pathways in KO
Term	Overlap	P-value	Adjusted P-value	Old P-value	Old Adjusted P-value	Odds Ratio	Combined Score	Genes
[truncated: 278 more rows]

[truncated: 3 more sheets: P0.05 up (2-fold, 511), UP gene list excluded NA (399), Enriched up pathways in KO]
